# Supplementary material for: Prebiotic Catalytic Peptide Ligation Yields Proteinogenic Peptides by Intramolecular Amide Catalyzed Hydrolysis Facilitating Regioselective Lysine Ligation in Neutral Water
Source: PubMed Central journal article supplement (PMC9204760; doi:10.1021/jacs.2c03486), 2022-05-31
Supplement: ja2c03486_si_001.pdf [file ja2c03486_si_001.pdf]

Prebiotic catalytic peptide ligation yields  
proteinogenic peptides by intramolecular amide  
catalyzed hydrolysis facilitating regioselective lysine  
ligation in neutral water.

Jyoti Singh<sup>‡</sup><sup>1</sup>, Daniel Whitaker<sup>‡</sup><sup>1</sup>, Benjamin Thoma<sup>1</sup>, Saidul Islam<sup>1,2</sup>, Callum S. Foden<sup>1</sup>, Abil E. Aliev<sup>1</sup>, Tom D. Sheppard<sup>1</sup>, and Matthew W. Powner<sup>\*1</sup>

<sup>1</sup>Department of Chemistry, University College London, 20 Gordon Street, London, WC1H 0AJ, UK

<sup>2</sup>Department of Chemistry, King's College London, 7 Trinity Street, London, SE1 1DB, UK

Contents

|                                                                                                                                   |    |
|-----------------------------------------------------------------------------------------------------------------------------------|----|
| General.....                                                                                                                      | 4  |
| Catalyst screening for the coupling of N-acetylglycine nitrile <b>1</b> with alanine <b>2<sub>A</sub></b> .....                   | 5  |
| Coupling of <b>1</b> with L-alanine <b>2<sub>A</sub></b> catalyzed by <b>6a</b> at room temperature.....                          | 6  |
| Coupling of <b>1</b> with L-alanine <b>2<sub>A</sub></b> catalyzed by <b>6b</b> at room temperature.....                          | 10 |
| Coupling of <b>1</b> with L-alanine <b>2<sub>A</sub></b> catalyzed by <b>6c</b> at room temperature.....                          | 12 |
| Coupling of <b>1</b> with L-alanine <b>2<sub>A</sub></b> catalyzed by <b>6d</b> at room temperature.....                          | 14 |
| Coupling of <b>1</b> with L-alanine <b>2<sub>A</sub></b> catalyzed by <b>6e</b> at room temperature.....                          | 15 |
| Coupling of <b>1</b> with L-alanine <b>2<sub>A</sub></b> catalyzed by <b>6f</b> at room temperature.....                          | 16 |
| Coupling of <b>1</b> with L-alanine <b>2<sub>A</sub></b> catalyzed by <b>6g</b> at room temperature.....                          | 18 |
| Coupling of <b>1</b> with L-alanine <b>2<sub>A</sub></b> catalyzed by <b>6h</b> at room temperature.....                          | 22 |
| Coupling of N-acetylglycine nitrile <b>1</b> with $\alpha$ -amino acids <b>2</b> at pH 8.5 and room temperature.....              | 25 |
| Coupling of <b>1</b> with L-alanine <b>2<sub>A</sub></b> at pH 8.5 and room temperature.....                                      | 26 |
| Coupling of <b>1</b> with L-aspartic acid <b>2<sub>D</sub></b> at pH 8.5 and room temperature.....                                | 28 |
| Coupling of <b>1</b> with L-arginine <b>2<sub>R</sub></b> at pH 8.5 and room temperature.....                                     | 30 |
| Coupling of <b>1</b> with L-asparagine <b>2<sub>N</sub></b> at pH 8.5 and room temperature.....                                   | 32 |
| Coupling of <b>1</b> with L-glutamic acid <b>2<sub>E</sub></b> at pH 8.5 and room temperature.....                                | 34 |
| Coupling of <b>1</b> with L-glutamine <b>2<sub>Q</sub></b> at pH 8.5 and room temperature.....                                    | 36 |
| Coupling of <b>1</b> with glycine <b>2<sub>G</sub></b> at pH 8.5 and room temperature.....                                        | 38 |
| Coupling of <b>1</b> with L-histidine <b>2<sub>H</sub></b> at pH 8.5 and room temperature.....                                    | 40 |
| Coupling of <b>1</b> with L-isoleucine <b>2<sub>I</sub></b> at pH 8.5 and room temperature.....                                   | 42 |
| Coupling of <b>1</b> with L-leucine <b>2<sub>L</sub></b> at pH 8.5 and room temperature.....                                      | 44 |
| Coupling of <b>1</b> with L-lysine <b>2<sub>K</sub></b> at pH 8.5 and room temperature.....                                       | 46 |
| Coupling of <b>1</b> with DL-methionine <b>2<sub>M</sub></b> at pH 8.5 and room temperature.....                                  | 48 |
| Coupling of <b>1</b> with L-phenylalanine <b>2<sub>F</sub></b> at pH 8.5 and room temperature.....                                | 50 |
| Coupling of <b>1</b> with L-proline <b>2<sub>P</sub></b> at pH 8.5 and room temperature.....                                      | 52 |
| Coupling of <b>1</b> with L-serine <b>2<sub>S</sub></b> at pH 8.5 and room temperature.....                                       | 54 |
| Coupling of <b>1</b> with L-tryptophan <b>2<sub>W</sub></b> at pH 8.5 and room temperature.....                                   | 56 |
| Coupling of <b>1</b> with L-threonine <b>2<sub>T</sub></b> at pH 8.5 and room temperature.....                                    | 58 |
| Coupling of <b>1</b> with L-valine <b>2<sub>V</sub></b> at pH 8.5 and room temperature.....                                       | 60 |
| Competitive coupling of <b>1</b> with glycine <b>2<sub>G</sub></b> and ammonium chloride.....                                     | 61 |
| Coupling of N-acetylglycine nitrile <b>1</b> with $\alpha$ -amino amides <b>2'</b> at pH 8.5 and room temperature.....            | 63 |
| Coupling of N-acetylglycine nitrile <b>1</b> with L-alaninamide <b>2<sub>A</sub>'</b> at pH 8.5 and room temperature..            | 64 |
| Coupling of N-acetylglycine nitrile <b>1</b> with L-aspartic acid amide <b>2<sub>D</sub>'</b> at pH 8.5 and room temperature..... | 66 |

|                                                                                                                                   |     |
|-----------------------------------------------------------------------------------------------------------------------------------|-----|
| Coupling of N-acetylglycine nitrile <b>1</b> with L-arginine amide <b>2<sub>R</sub>'</b> at pH 8.5 and room temperature .....     | 69  |
| Coupling of N-acetylglycine nitrile <b>1</b> with L-asparagine amide <b>2<sub>N</sub>'</b> at pH 8.5 and room temperature.....    | 72  |
| Coupling of N-acetylglycine nitrile <b>1</b> with L-glutamic acid amide <b>2<sub>E</sub>'</b> at pH 8.5 and room temperature..... | 75  |
| Coupling of N-acetylglycine nitrile <b>1</b> with L-glutamine amide <b>2<sub>Q</sub>'</b> at pH 8.5 and room temperature.....     | 78  |
| Coupling of N-acetylglycine nitrile <b>1</b> with glycnamide <b>2<sub>G</sub>'</b> at pH 8.5 and room temperature .....           | 80  |
| Coupling of N-acetylglycine nitrile <b>1</b> with L-histidine amide <b>2<sub>H</sub>'</b> at pH 8.5 and room temperature .....    | 83  |
| Coupling of N-acetylglycine nitrile <b>1</b> with L-isoleucinamide <b>2<sub>I</sub>'</b> at pH 8.5 and room temperature .....     | 86  |
| Coupling of N-acetylglycine nitrile <b>1</b> with L-leucinamide <b>2<sub>L</sub>'</b> at pH 8.5 and room temperature... ..        | 88  |
| Coupling of N-acetylglycine nitrile <b>1</b> with DL-methionine amide <b>2<sub>M</sub>'</b> at pH 8.5 and room temperature.....   | 91  |
| Coupling of N-acetylglycine nitrile <b>1</b> with L-phenylalaninamide <b>2<sub>F</sub>'</b> at pH 8.5 and room temperature.....   | 94  |
| Coupling of N-acetylglycine nitrile <b>1</b> with L-prolinamide <b>2<sub>P</sub>'</b> at pH 8.5 and room temperature .. ..        | 96  |
| Coupling of N-acetylglycine nitrile <b>1</b> with L-serinamide <b>2<sub>S</sub>'</b> at pH 8.5 and room temperature .....         | 98  |
| Coupling of N-acetylglycine nitrile <b>1</b> with L-tryptophan amide <b>2<sub>W</sub>'</b> at pH 8.5 and room temperature.....    | 101 |
| Coupling of N-acetylglycine nitrile <b>1</b> with L-tyrosinamide <b>2<sub>Y</sub>'</b> at pH 8.5 and room temperature .....       | 104 |
| Coupling of N-acetylglycine nitrile <b>1</b> with L-threoninamide <b>2<sub>T</sub>'</b> at pH 8.5 and room temperature .....      | 106 |
| Coupling of N-acetylglycine nitrile <b>1</b> with L-valinamide <b>2<sub>V</sub>'</b> at pH 8.5 and room temperature .. ..         | 109 |
| Coupling of <b>1</b> with peptide fragments catalyzed by <b>6b</b> .....                                                          | 112 |
| Coupling of <b>1</b> with L-alanyl-glycyl-L-alanine <b>2<sub>AGA</sub></b> .....                                                  | 112 |
| Coupling of <b>1</b> with L-alanyl-glycine <b>2<sub>AG</sub></b> .....                                                            | 117 |
| Preparative synthesis of amidines <b>3'</b> .....                                                                                 | 119 |
| Isolation of <b>3<sub>A</sub></b> .....                                                                                           | 128 |
| Hydrolysis of authentic amidines <b>3'</b> .....                                                                                  | 130 |
| Hydrolysis of <b>3<sub>A</sub>'</b> at pH 7 in phosphate buffer (100 mM).....                                                     | 130 |
| Hydrolysis of <b>3<sub>A</sub>'</b> at pH 7.....                                                                                  | 131 |
| Hydrolysis of <b>3<sub>A</sub>'</b> at pH 9.....                                                                                  | 132 |
| Hydrolysis of <b>3<sub>A</sub>'</b> at pH 10.....                                                                                 | 133 |
| Hydrolysis of <b>3<sub>G</sub>'</b> at pH 9.....                                                                                  | 134 |

|                                                                                                                            |     |
|----------------------------------------------------------------------------------------------------------------------------|-----|
| Hydrolysis of <b>3<sub>G</sub>'</b> at pH 9 in the presence of 3-mercaptopropionic acid <b>6b</b> .....                    | 135 |
| Hydrolysis of <b>3<sub>G</sub>'</b> at pH 9 in the presence of L-alanine ( <b>2<sub>A</sub></b> ).....                     | 136 |
| Hydrolysis of <b>3<sub>G</sub>'</b> at pH 9 in the presence of L-alaninamide ( <b>2<sub>A</sub>'</b> ).....                | 137 |
| Hydrolysis of <b>3<sub>A</sub></b> .....                                                                                   | 138 |
| Hydrolysis of <b>3<sub>A</sub></b> at pH 7.....                                                                            | 138 |
| Hydrolysis of <b>3<sub>A</sub></b> at pH 9.....                                                                            | 139 |
| $\alpha$ -selective ligation of lysine-peptides .....                                                                      | 140 |
| Coupling of N-acetylglycine nitrile <b>1</b> with L-lysineamide <b>2<sub>K</sub>'</b> at pH 8.5 and room temperature...    | 140 |
| Coupling of N-acetylglycine nitrile <b>1</b> with L-lysineamide <b>2<sub>K</sub>'</b> at pH 9.0, 80 °C.....                | 142 |
| Coupling of N-acetylglycine nitrile <b>1</b> with L-lysineamide <b>2<sub>K</sub>'</b> at pH 7.0, 80°C .....                | 144 |
| Coupling of N-acetylglycine nitrile <b>1</b> with L-lysylglycine <b>2<sub>KG</sub></b> at pH 7.0, 80 °C.....               | 145 |
| Coupling of N-acetylglycine nitrile <b>1</b> with L-lysyl-L-lysine <b>2<sub>KK</sub></b> at pH 7.0, 80 °C .....            | 147 |
| Coupling of N-acetylglycine nitrile <b>1</b> with O-methyl serinamide <b>2<sub>MeS</sub>'</b> catalyzed by <b>6b</b> ..... | 149 |

## General

$^1\text{H}$ ,  $^{13}\text{C}$  and  $^{19}\text{F}$  NMR spectra were recorded on Bruker NMR spectrometers AVANCE Neo 700, AVANCE III 600 and AVANCE III 400, equipped with a Bruker room temperature 5 mm multinuclear gradient probe (700 MHz), 5 mm DCH cryoprobe (600 MHz) and a gradient probe (400 MHz). Unless otherwise stated  $^{13}\text{C}$  NMR spectra were acquired with broadband  $^1\text{H}$ -decoupling. All chemical shifts ( $\delta$ ) are reported in parts per million (ppm) relative to residual solvent peaks, and  $^1\text{H}$  and  $^{13}\text{C}$  chemical shifts relative to TMS were calibrated using the residual solvent peak (residual solvent peaks: ( $\delta\text{H/ppm}$ )  $\text{D}_2\text{O}$  – 4.75;  $\text{CDCl}_3$  – 7.26;  $\text{CD}_3\text{OD}$  – 3.31). Nuclear assignments were made using 2D NMR homo- and heteronuclear correlation spectroscopy ( $^1\text{H}$ - $^1\text{H}$  COSY;  $^1\text{H}$ - $^{13}\text{C}$  HSQC;  $^1\text{H}$ - $^{13}\text{C}$  HMBC). Where noted, solvent suppression pulse sequence with presaturation and spoil gradients was used to obtain  $^1\text{H}$  NMR spectra (noesygppr1d, Bruker) and  $^1\text{H}$ - $^{13}\text{C}$  HMBC NMR spectra (hmbcglpndprqf, Bruker). Coupling constants are reported in Hertz (Hz). Spin multiplicities are indicated by symbols: s (singlet); d (doublet); t (triplet); q (quartet); qn (quintet); spt (septet); oct (octet), m (multiplet); obs. (obscured/coincidental signals), or a combination of these. Spectra were recorded at 298 K. Reagents and solvents were obtained and used without further purification, unless specified, from the following commercial sources: Alfa Aesar, Acros Organics, Apollo Scientific, BDH, Sigma Aldrich, Fluorochem, MerckMillipore, Fisher Scientific, VWR International, Carbosynth, Manchester Organics, Lancaster, Molekula, Honeywell, TCI and Santa Cruz Biotechnology. Deionized water was obtained from an Elga Option 3 purification system. Infrared spectra (IR) were recorded on a Shimadzu IR Tracer 100 FT-IR spectrometer as a solid or neat oil/liquid. Absorption maxima are reported in wavenumber ( $\text{cm}^{-1}$ ). Mass spectra and accurate mass measurements were recorded on a Waters LCT Premier QTOF connected to a Waters Autosampler Manager 2777C, Thermo Finnigan MAT900, and an Agilent LC connected to an Agilent 6510 QTOF mass spectrometer at the Department of Chemistry, University College London. Solution pH values were measured using a Mettler Toledo Seven Compact pH meter with a Mettler Toledo InLab semi-micro pH probe, or a Corning 430 pH meter with a Fisherbrand FB68801 semi-micro pH probe. The readings for  $\text{D}_2\text{O}$  solutions are reported as pD, and corrected as measured pH + 0.4.<sup>1</sup> The readings for  $\text{H}_2\text{O}$  and  $\text{H}_2\text{O}/\text{D}_2\text{O}$  (9:1) solutions are reported uncorrected.

## Catalyst screening for the coupling of N-acetylglycine nitrile **1** with alanine **2<sub>A</sub>**

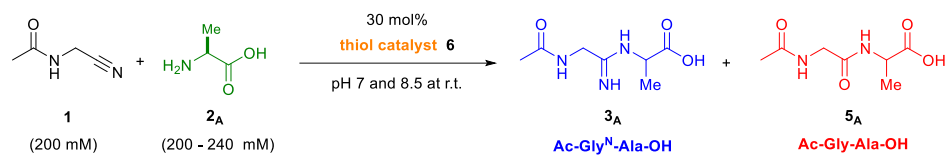

### Thiol-Catalyst

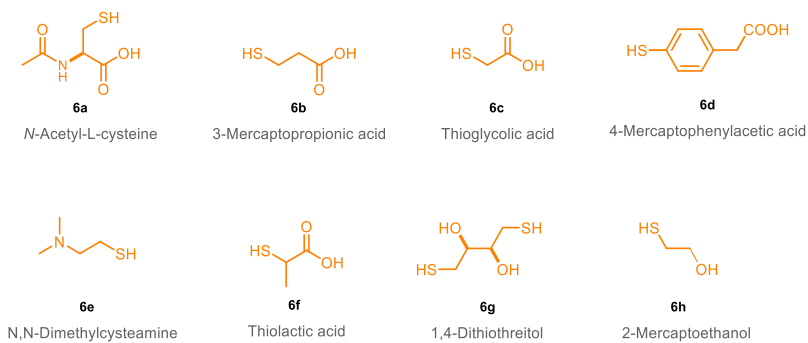

**Figure S1:** Formation of Ac-Gly<sup>N</sup>-Ala-OH **3<sub>A</sub>** by thiol-catalyzed (Catalyst-SH; 30 mol%) coupling of N-acetyl glycine nitrile, **1** (200 mM) and L-Ala, **2<sub>A</sub>** (200 - 240 mM).

*Coupling of 1 with L-alanine 2<sub>A</sub> catalyzed by 6a at room temperature*

N-Acetylglycine nitrile (**1**, 200 mM), L-alanine (**2<sub>A</sub>**, 200 mM), and L-N-acetyl cysteine (**6a**, 30 mol%, 60 mM) were dissolved in H<sub>2</sub>O/D<sub>2</sub>O (9:1, 0.8 mL) along with methyl sulfonyl methane (MSM; 14 mM) as internal standard. The pH of the solution was adjusted to the desired value with 4 M HCl/NaOH, the solution volume was increased to 1 mL and NMR spectra were obtained periodically.

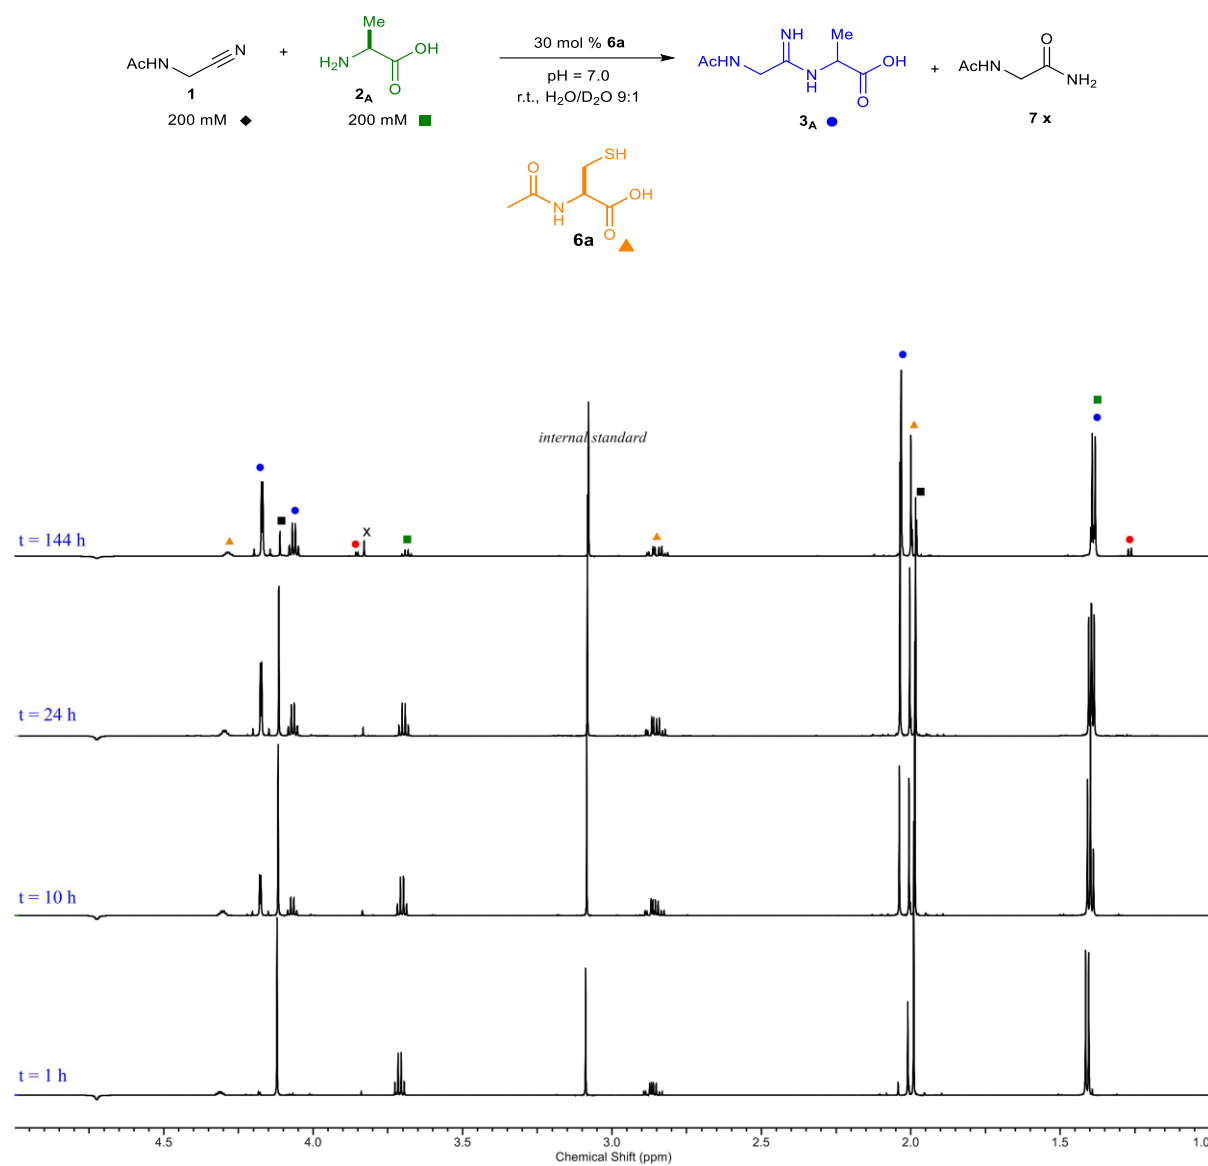

**Figure S2:** <sup>1</sup>H NMR (700 MHz, H<sub>2</sub>O/D<sub>2</sub>O 9:1, noesygppr1d, 1.0-5.0 ppm) spectrum to show the reaction of N-acetyl glycine nitrile (**1**, 200 mM) with L-alanine (**2<sub>A</sub>**, 200 mM) and L-N-acetyl cysteine (**6a**, 60 mM), with MSM (14 mM) as an internal standard, at pH 7, room temperature.

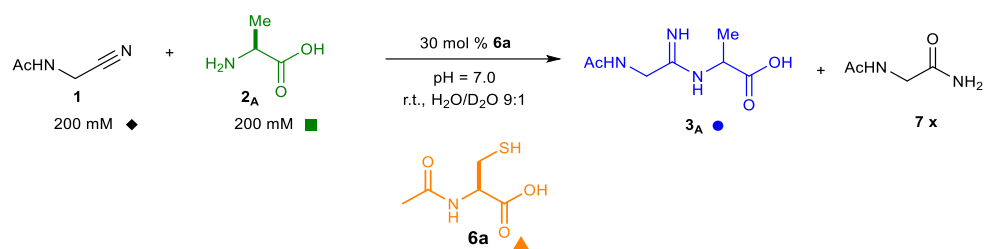

| Entry | time / h | 1 / % | 2A / % | 3A / % | 7 / % |
|-------|----------|-------|--------|--------|-------|
| 1     | 1        | 91    | 92     | 1      | 2     |
| 2     | 7        | 88    | 89     | 6      | 3     |
| 3     | 12       | 83    | 84     | 11     | 3     |
| 4     | 25       | 69    | 72     | 25     | 4     |
| 5     | 37       | 58    | 60     | 37     | 4     |
| 6     | 49       | 47    | 50     | 46     | 4     |
| 7     | 61       | 40    | 42     | 54     | 4     |
| 8     | 73       | 34    | 36     | 61     | 5     |
| 9     | 97       | 25    | 27     | 69     | 5     |
| 10    | 121      | 19    | 22     | 74     | 5     |
| 11    | 145      | 16    | 18     | 77     | 6     |

**Table S1.** Yields over time for the reaction between N-acetyl glycine nitrile (1, 200 mM) with L-alanine (2A, 200 mM) and L-N-acetyl cysteine (6a, 60 mM) at pH 7.0, room temperature.

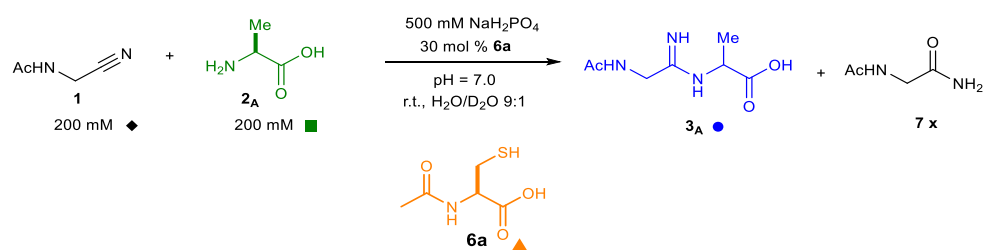

| Entry | time / h | 1 / % | 2A / % | 3A / % | 7 / % |
|-------|----------|-------|--------|--------|-------|
| 1     | 1        | 96    | 107    | 0      | 3     |
| 2     | 7        | 90    | 104    | 6      | 6     |
| 3     | 12       | 83    | 100    | 10     | 9     |
| 4     | 25       | 69    | 93     | 18     | 16    |
| 5     | 37       | 57    | 86     | 23     | 21    |
| 6     | 49       | 48    | 81     | 28     | 26    |
| 7     | 61       | 41    | 78     | 32     | 29    |
| 8     | 73       | 34    | 74     | 35     | 33    |
| 9     | 97       | 25    | 70     | 39     | 38    |
| 10    | 121      | 18    | 66     | 43     | 42    |
| 11    | 145      | 13    | 64     | 45     | 45    |

**Table S2.** Yields over time for the reaction between N-acetyl glycine nitrile (1, 200 mM) with L-alanine (2A, 200 mM) and L-N-acetyl cysteine (6a, 60 mM) in phosphate buffer (500 mM) at pH 7.0, room temperature.



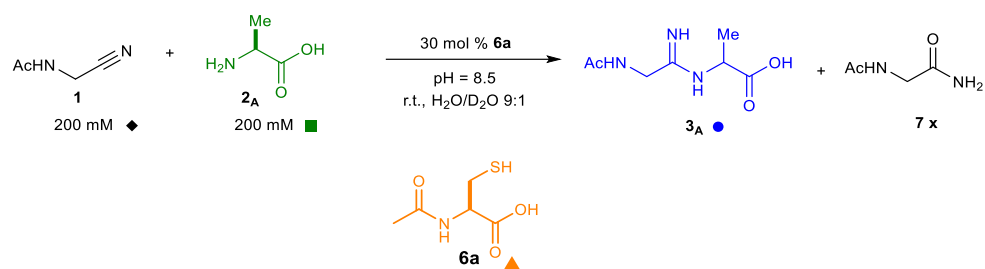

| Entry | time / h | <b>1</b> / % | <b>2A</b> / % | <b>3A</b> / % | <b>7</b> / % |
|-------|----------|--------------|---------------|---------------|--------------|
| 1     | 1        | 84           | 96            | 5             | 2            |
| 2     | 7        | 67           | 77            | 22            | 2            |
| 3     | 12       | 56           | 65            | 35            | 3            |
| 4     | 25       | 39           | 45            | 53            | 2            |
| 5     | 37       | 30           | 36            | 63            | 3            |
| 6     | 49       | 24           | 30            | 69            | 3            |
| 7     | 61       | 20           | 25            | 71            | 4            |
| 8     | 73       | 17           | 22            | 75            | 4            |
| 9     | 97       | 13           | 19            | 77            | 5            |
| 10    | 121      | 11           | 17            | 79            | 6            |
| 11    | 145      | 9            | 16            | 81            | 7            |

**Table S3.** Yields over time for the reaction between N-acetyl glycine nitrile (**1**, 200 mM) with L-alanine (**2A**, 200 mM) and L-N-acetyl cysteine (**6a**, 60 mM) at pH 8.5, room temperature.

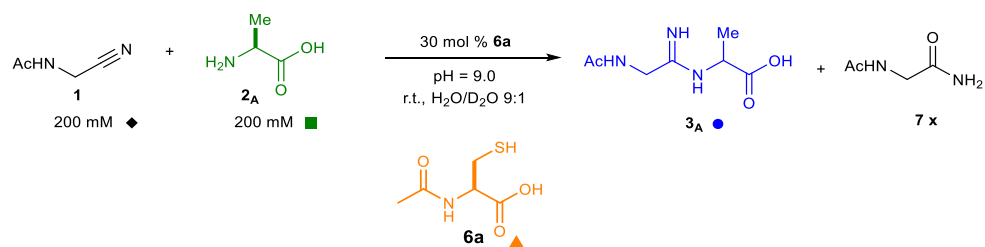

| Entry | time / h | <b>1</b> / % | <b>2A</b> / % | <b>3A</b> / % | <b>7</b> / % |
|-------|----------|--------------|---------------|---------------|--------------|
| 1     | 1        | 84           | 96            | 5             | 2            |
| 2     | 7        | 67           | 77            | 22            | 2            |
| 3     | 12       | 56           | 65            | 35            | 3            |
| 4     | 25       | 39           | 45            | 53            | 2            |
| 5     | 37       | 30           | 36            | 63            | 3            |
| 6     | 49       | 24           | 30            | 69            | 3            |
| 7     | 61       | 20           | 25            | 71            | 4            |
| 8     | 73       | 17           | 22            | 75            | 4            |
| 9     | 97       | 13           | 19            | 77            | 5            |
| 10    | 121      | 11           | 17            | 79            | 6            |
| 11    | 145      | 9            | 16            | 81            | 7            |

**Table S4.** Yields over time for the reaction between N-acetyl glycine nitrile (**1**, 200 mM) with L-alanine (**2A**, 200 mM) and L-N-acetyl cysteine (**6a**, 60 mM) at pH 9.0, room temperature.

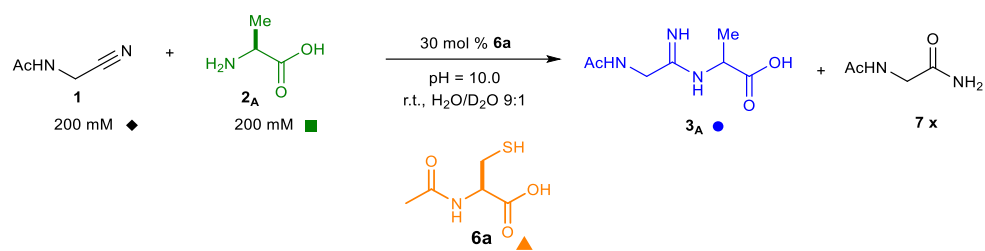

| Entry | time / h | 1 / % | 2A / % | 3A / % | 7 / % |
|-------|----------|-------|--------|--------|-------|
| 1     | 2        | 84    | 95     | 2      | 2     |
| 2     | 7        | 76    | 86     | 9      | 2     |
| 3     | 12       | 71    | 82     | 14     | 3     |
| 4     | 25       | 61    | 73     | 21     | 5     |
| 5     | 37       | 55    | 69     | 26     | 7     |
| 6     | 49       | 49    | 66     | 28     | 10    |
| 7     | 61       | 43    | 61     | 28     | 12    |
| 8     | 73       | 39    | 60     | 29     | 14    |
| 9     | 97       | 33    | 56     | 27     | 20    |
| 10    | 121      | 28    | 55     | 27     | 24    |

**Table S5.** Yields over time for the reaction between N-acetyl glycine nitrile (1, 200 mM) with L-alanine (2A, 200 mM) and L-N-acetyl cysteine (6a, 60 mM) at pH 10.0, room temperature.

Coupling of **1** with L-alanine **2<sub>A</sub>** catalyzed by **6b** at room temperature

N-Acetylglycine nitrile (**1**, 200 mM), L-alanine (**2<sub>A</sub>**, 220 mM), and 3-mercaptopropionic acid (**6b**, 30 mol%, 60 mM) and MSM (100 mM) as internal standard were dissolved in H<sub>2</sub>O/D<sub>2</sub>O (9:1, 0.8 mL). The pH of the solution was adjusted to the desired value with 4 M HCl/NaOH, the solution volume was increased to 1 mL and NMR spectra were obtained periodically.

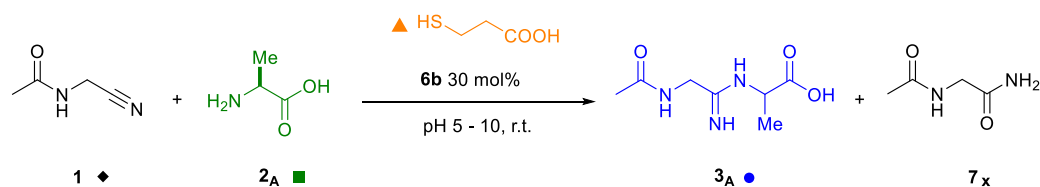

| Entry | Time /h | pH = 5<br>3 <sub>A</sub> / % | pH = 7<br>3 <sub>A</sub> / % | pH = 7,<br>1 M Pi,<br>3 <sub>A</sub> / % | pH = 8.5<br>1 M borate,<br>3 <sub>A</sub> / % | pH = 9<br>1 M borate,<br>3 <sub>A</sub> / % | pH = 10<br>3 <sub>A</sub> / % |
|-------|---------|------------------------------|------------------------------|------------------------------------------|-----------------------------------------------|---------------------------------------------|-------------------------------|
| 1     | 1       | 0                            | 0                            | 0                                        | 25                                            | 32                                          | 17                            |
| 2     | 6       | 0                            | 4                            | 3                                        | 57                                            | 61                                          | 32                            |
| 3     | 12      | 0                            | 7                            | 6                                        | 73                                            | 78                                          | 38                            |
| 4     | 24      | 0                            | 14                           | 11                                       | 87                                            | 88                                          | 43                            |
| 5     | 36      | 0                            | 21                           | 16                                       | 91                                            | 91                                          | 41                            |
| 6     | 48      | 0                            | 29                           | 20                                       | 93                                            | 90                                          | 38                            |
| 7     | 60      | 0                            | 38                           | 24                                       | 94                                            | 90                                          | 34                            |
| 8     | 72      | 0                            | 44                           | 27                                       | 94                                            | 89                                          | 30                            |
| 9     | 96      | 0                            | 59                           | 33                                       | 93                                            | 87                                          | 25                            |
| 10    | 108     | 0                            | 64                           | 35                                       | 92                                            | -                                           | 20                            |
| 11    | 120     | 0                            | 71                           | 36                                       | 92                                            | -                                           | -                             |
| 12    | 144     | -                            | 82                           | 39.5                                     | 91                                            | -                                           | -                             |
| 13    | 192     | -                            | 88                           | 45.3                                     | 90                                            | -                                           | -                             |
| 14    | 230     | -                            | 94                           | 50                                       | -                                             | -                                           | -                             |

Table S6: Coupling of N-acetyl glycine nitrile (**1**) with L-alanine (**2<sub>A</sub>**) catalyzed by 3-mercaptopropionic acid (**6b**) at various pH at room temperature

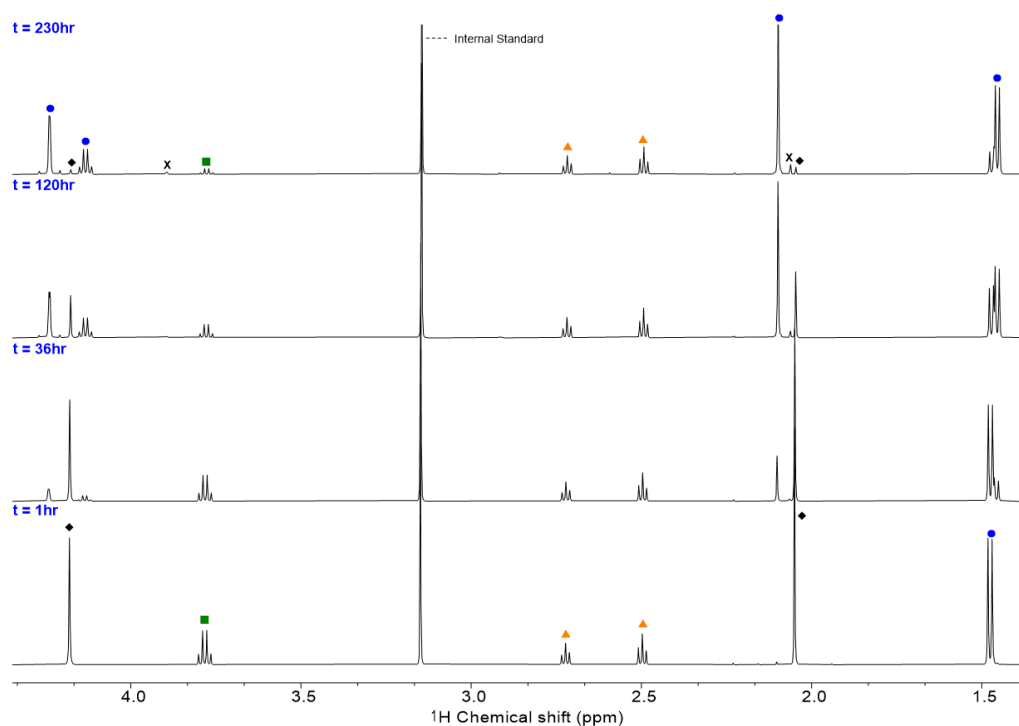

Figure S3: <sup>1</sup>H NMR (600 MHz, H<sub>2</sub>O/D<sub>2</sub>O 9:1, noesygppr1d, 1.4-4.5 ppm) spectrum to show the reaction of N-acetyl glycine nitrile (**1**, 200 mM) with L-alanine (**2<sub>A</sub>**, 220 mM) and 3-mercaptopropionic acid (**6b**, 60 mM), with MSM (100 mM) as an internal standard, at pH 7, room temperature.

| Entry | Time / h | 3 <sub>A</sub> / % |
|-------|----------|--------------------|
| 1     | 1        | 25                 |
| 2     | 6        | 52                 |
| 3     | 12       | 72                 |
| 4     | 24       | 86                 |
| 5     | 36       | 90                 |
| 6     | 48       | 92                 |
| 7     | 60       | 92                 |

**Table S7:** Coupling of N-acetyl glycine nitrile (**1**) with L-alanine (**2<sub>A</sub>**) catalyzed by 3-mercaptopropanoic acid (**6b**) at pH = 8.5, at room temperature

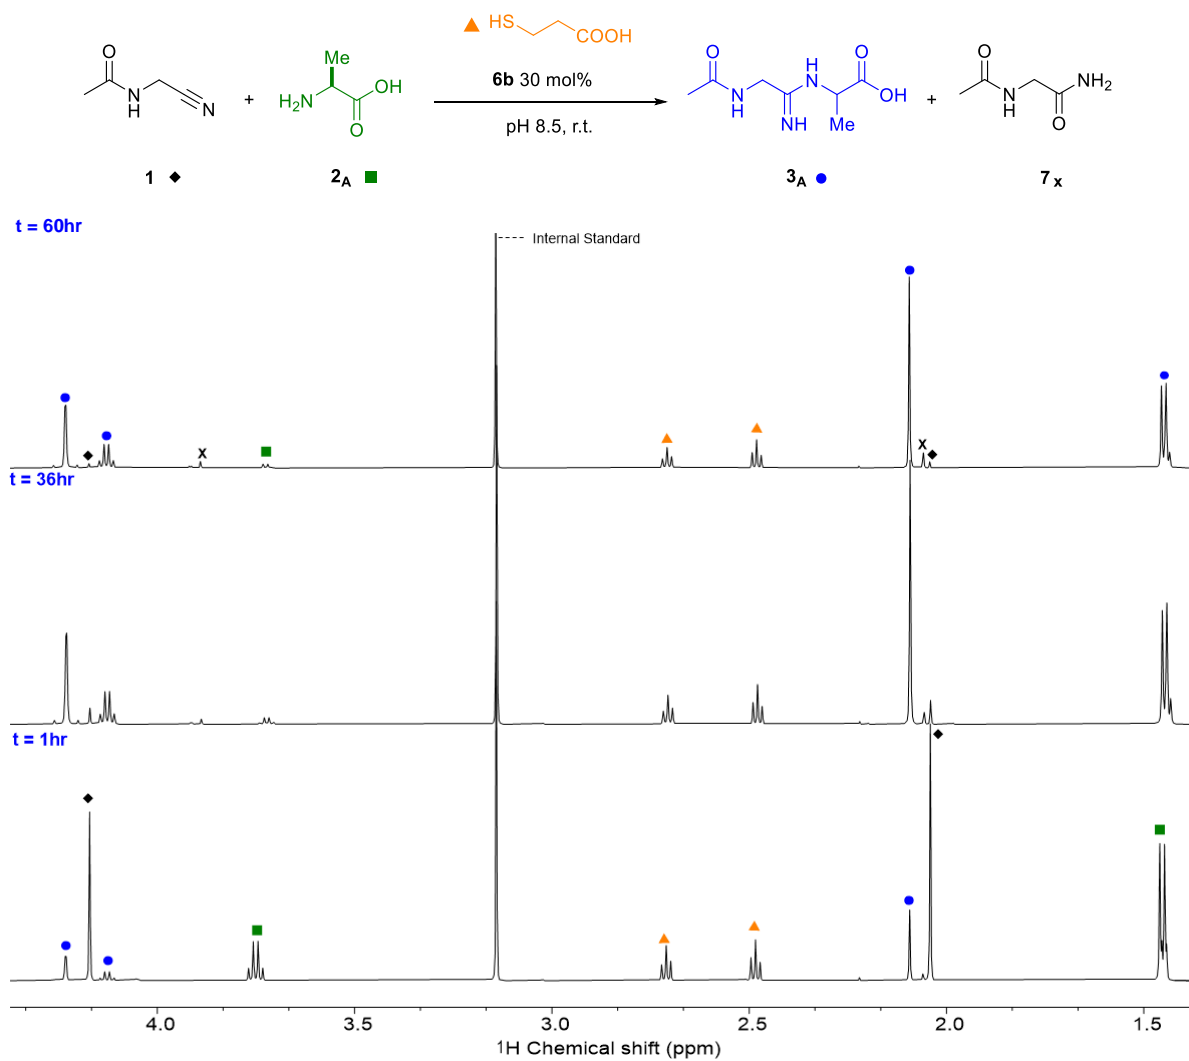

**Figure S4:** <sup>1</sup>H NMR (600 MHz, H<sub>2</sub>O/D<sub>2</sub>O 9:1, *noesygppr1d*, 1.4-4.5 ppm) spectrum to show the reaction of N-acetyl glycine nitrile (**1**, 200 mM) with L-alanine (**2<sub>A</sub>**, 220 mM) and 3-mercaptopropanoic acid (**6b**, 60 mM), with MSM (100 mM) as an internal standard, at pH 8.5, room temperature.

Coupling of **1** with L-alanine **2<sub>A</sub>** catalyzed by **6c** at room temperature

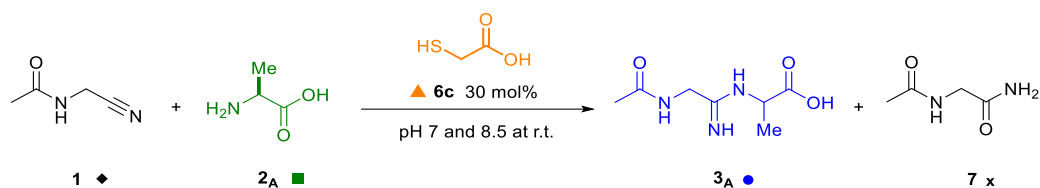

N-Acetylglycine nitrile (**1**, 200 mM), L-alanine (**2<sub>A</sub>**, 220 mM), and thioglycolic acid (**6c**, 30 mol%, 60 mM) and MSM (4 mM) as internal standard were dissolved in H<sub>2</sub>O/D<sub>2</sub>O (9:1, 0.8 mL). The pH of the solution was adjusted to the desired value with 4 M HCl/NaOH, the solution volume was increased to 1 mL and NMR spectra were obtained periodically.

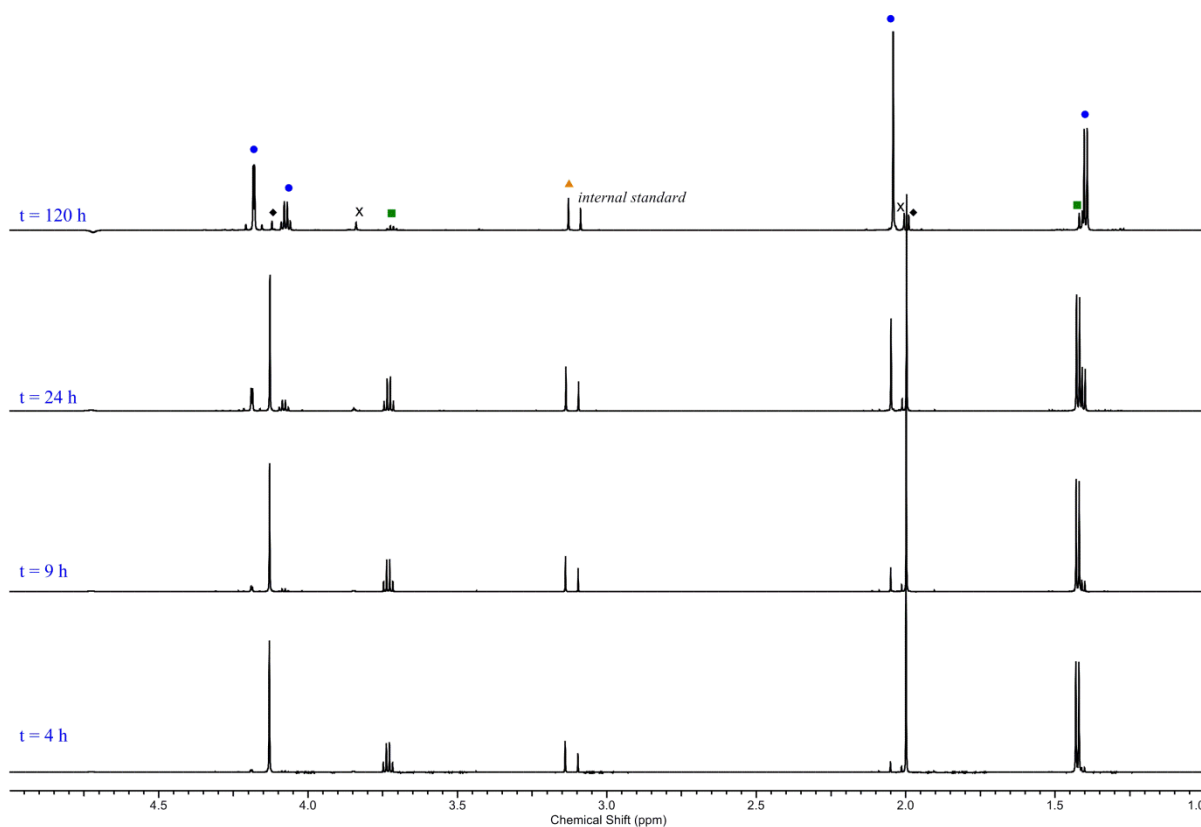

**Figure S5:** <sup>1</sup>H NMR (700 MHz, H<sub>2</sub>O/D<sub>2</sub>O 9:1, *noesygppr1d*, 1.0-5.0 ppm) spectrum to show the reaction of N-acetyl glycine nitrile (**1**, 200 mM) with L-alanine (**2<sub>A</sub>**, 200 mM) and thioglycolic acid (**6c**, 60 mM), with MSM (4 mM) as an internal standard, at pH 7.0, room temperature.

| Entry | time / h | <b>1</b> / % | <b>2<sub>A</sub></b> / % | <b>3<sub>A</sub></b> / % | <b>7</b> / % |
|-------|----------|--------------|--------------------------|--------------------------|--------------|
| 1     | 4        | 92           | 92                       | 5                        | 3            |
| 2     | 9        | 88           | 88                       | 11                       | 3            |
| 3     | 15       | 81           | 82                       | 18                       | 3            |
| 4     | 26       | 67           | 70                       | 33                       | 4            |
| 5     | 36       | 57           | 61                       | 44                       | 4            |
| 6     | 48       | 43           | 48                       | 59                       | 5            |
| 7     | 74       | 20           | 26                       | 82                       | 6            |
| 8     | 120      | 8            | 14                       | 90                       | 7            |

**Table S8.** Yields over time for the reaction between N-acetyl glycine nitrile (**1**, 200 mM) with L-alanine (**2<sub>A</sub>**, 200 mM) and thioglycolic acid (**6c**, 60 mM) at pH 7.0, room temperature.

*N*-Acetylglycine nitrile (**1**, 200 mM), L-alanine (**2<sub>A</sub>**, 220 mM), and thioglycolic acid (**6c**, 30 mol%, 60 mM) and MSM (100 mM) as internal standard were dissolved in H<sub>2</sub>O/D<sub>2</sub>O (9:1, 0.8 mL). The pH of the solution was adjusted to the desired value with 4 M HCl/NaOH, the solution volume was increased to 1 mL and NMR spectra were obtained periodically.

| Entry | Time / h | pH = 5.3<br>3 <sub>A</sub> / % | pH = 8.5,<br>3 <sub>A</sub> / % | pH = 8.5<br>1 M borate,<br>3 <sub>A</sub> / % | pH = 9.5,<br>3 <sub>A</sub> / % | pH = 10<br>3 <sub>A</sub> / % |
|-------|----------|--------------------------------|---------------------------------|-----------------------------------------------|---------------------------------|-------------------------------|
| 1     | 1        | 0                              | 21                              | 23.5                                          | -                               | 12                            |
| 2     | 12       | 0                              | 71                              | 74                                            | 65                              | 42.3                          |
| 3     | 20       | 0                              | 80                              | -                                             | -                               | -                             |
| 4     | 24       | 0                              | 83                              | 85                                            | 68                              | 47                            |
| 5     | 30       | 0                              | 84.5                            | 88                                            | -                               | -                             |
| 6     | 36       | 0                              | 85                              | 89                                            | 67.3                            | -                             |
| 7     | 48       | 0                              | 87                              | 92                                            | 62                              | 43.3                          |
| 8     | 60       | 0                              | 88.5                            | 93                                            | 58                              | -                             |
| 9     | 72       | 0                              | 87                              | 93                                            | 56                              | 36.5                          |
| 10    | 96       | 0                              | 86                              | 91                                            | 50                              | 28                            |
| 11    | 120      | 0                              | 84.8                            | 90                                            | 46                              | 24.6                          |

**Table S9.** Yields over time for the reaction between *N*-acetyl glycine nitrile (**1**, 200 mM) with L-alanine (**2<sub>A</sub>**, 200 mM) and thioglycolic acid (**6c**, 60 mM) at various pH, room temperature.

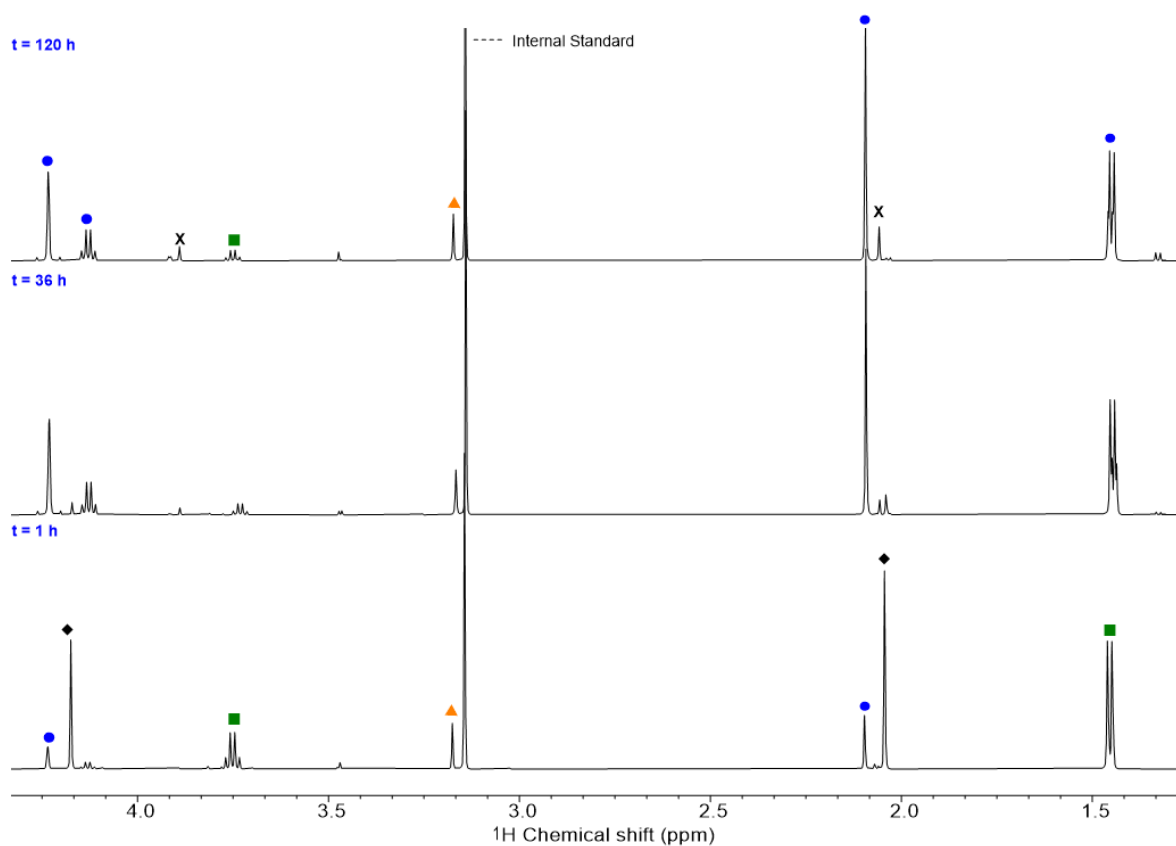

**Figure S6:** <sup>1</sup>H NMR (700 MHz, H<sub>2</sub>O/D<sub>2</sub>O 9:1, *noesygppr1d*, 1.3-4.5 ppm) spectrum to show the reaction of *N*-acetyl glycine nitrile (**1**, 200 mM) with L-alanine (**2<sub>A</sub>**, 200 mM) and thioglycolic acid (**6c**, 60 mM), with MSM (100 mM) as an internal standard, at pH 8.5, room temperature.

Coupling of **1** with L-alanine **2<sub>A</sub>** catalyzed by **6d** at room temperature

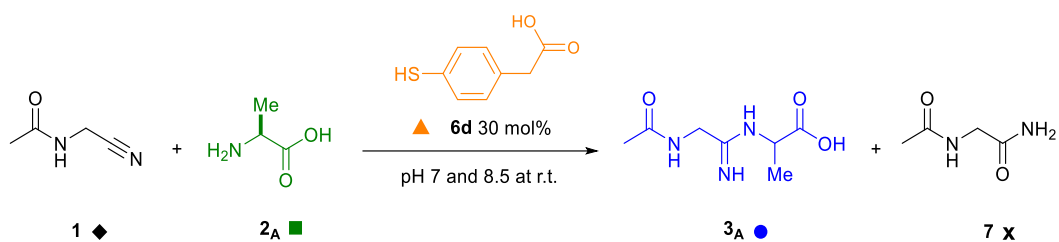

N-Acetylglycine nitrile (**1**, 200 mM), L-alanine (**2<sub>A</sub>**, 220 mM), and 4-mercaptophenylacetic acid (**6d**, 30 mol%, 60 mM) and MSM (100 mM) as an internal standard were dissolved in H<sub>2</sub>O/D<sub>2</sub>O (9:1, 0.8 mL). The pH of the solution was adjusted to the desired value with 4 M HCl/NaOH, the solution volume was increased to 1 mL and NMR spectra were obtained periodically.

| Entry | Time / h | pH = 7<br><b>3<sub>A</sub></b> / % | pH = 8.5<br><b>3<sub>A</sub></b> / % |
|-------|----------|------------------------------------|--------------------------------------|
| 1     | 1        | 0                                  | 0                                    |
| 2     | 12       | 7                                  | 2                                    |
| 3     | 24       | 12                                 | 3                                    |
| 4     | 36       | 17                                 | 4                                    |
| 5     | 48       | 21                                 | 7                                    |
| 7     | 72       | 30                                 | 9                                    |
| 8     | 96       | 36                                 | 12                                   |
| 9     | 120      | 43                                 | 13                                   |
| 10    | 144      | 48                                 | 16                                   |
| 11    | 168      | 50                                 | 18                                   |

**Table S10:** Coupling of N-acetyl glycine nitrile (**1**) with L-alanine (**2<sub>A</sub>**) catalyzed by 4-mercaptophenylacetic acid (**6d**) at pH = 7 and pH = 8.5 at room temperature

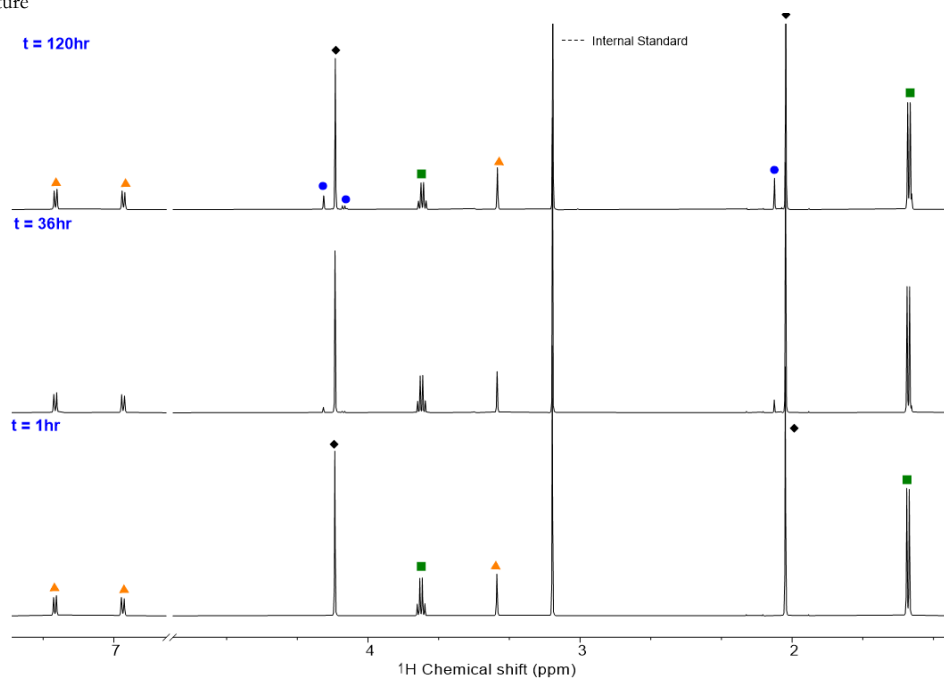

**Figure S7:** <sup>1</sup>H NMR (600 MHz, H<sub>2</sub>O/D<sub>2</sub>O 9:1, noesygppr1d, 1.1-7.5 ppm) spectrum to show the reaction of N-acetyl glycine nitrile (**1**, 200 mM) with L-alanine (**2<sub>A</sub>**, 220 mM) and 4-mercaptophenylacetic acid (**6d**, 60 mM), with MSM (100 mM) as an internal standard, at pH 8.5, room temperature.

Coupling of **1** with L-alanine **2<sub>A</sub>** catalyzed by **6e** at room temperature

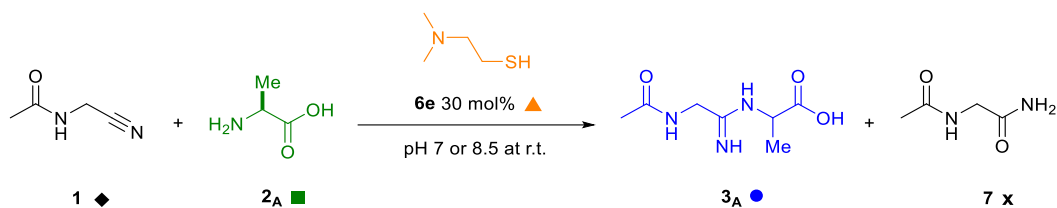

*N*-Acetylglycine nitrile (**1**, 200 mM), L-alanine (**2<sub>A</sub>**, 220 mM), and *N,N*-dimethyl cysteamine (**6e**, 30 mol%, 60 mM) and MSM (100 mM) as an internal standard were dissolved in H<sub>2</sub>O/D<sub>2</sub>O (9:1, 0.8 mL). The pH of the solution was adjusted to the desired value with 4 M HCl/NaOH, the solution volume was increased to 1 mL and NMR spectra were obtained periodically.

| Entry | Time //h | pH = 7                  | pH = 8.5                |
|-------|----------|-------------------------|-------------------------|
|       |          | <b>3<sub>A</sub></b> /% | <b>3<sub>A</sub></b> /% |
| 1     | 1        | 2                       | 10                      |
| 2     | 12       | 12                      | 19.3                    |
| 3     | 24       | 22                      | 32                      |
| 4     | 36       | 28                      | 41                      |
| 5     | 48       | 35                      | 50                      |
| 7     | 72       | 41                      | 57                      |
| 8     | 96       | 48                      | 61                      |
| 9     | 120      | 52                      | 65                      |

**Table S11:** Coupling of *N*-acetyl glycine nitrile (**1**) with L-alanine (**2<sub>A</sub>**) catalyzed by *N,N*-dimethyl cysteamine (**6e**) at pH = 7 and pH = 8.5 at room temperature

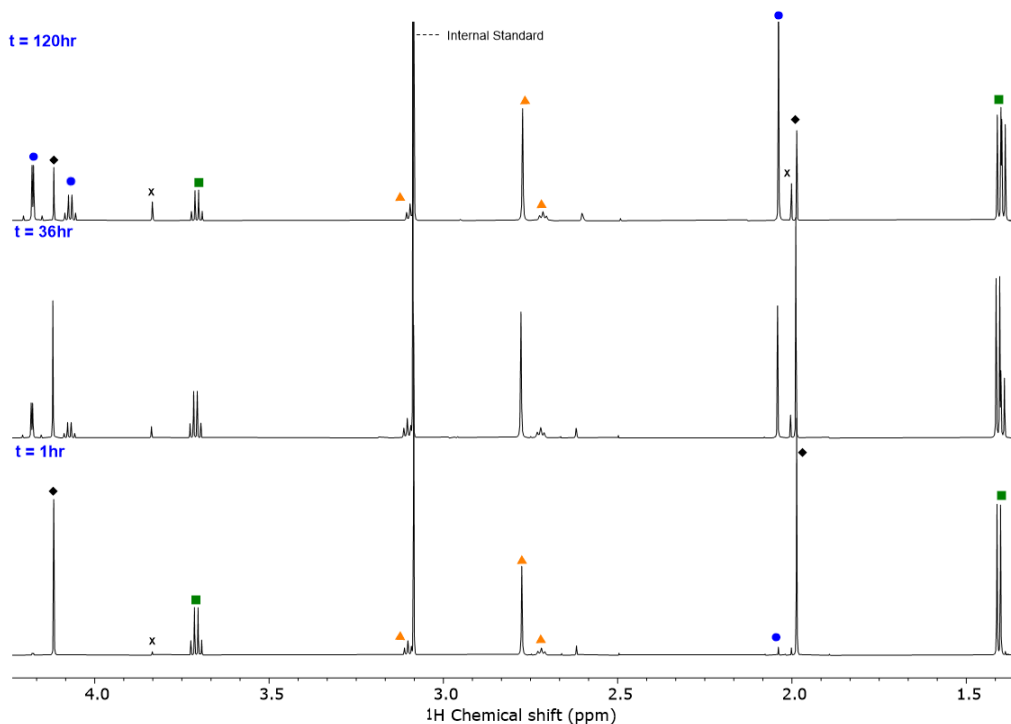

**Figure S8:** <sup>1</sup>H NMR (600 MHz, H<sub>2</sub>O/D<sub>2</sub>O 9:1, noesygppr1d, 1.4-4.2 ppm) spectrum to show the reaction of *N*-acetyl glycine nitrile (**1**, 200 mM) with L-alanine (**2<sub>A</sub>**, 220 mM) and *N,N*-dimethyl cysteamine (**6e**, 60 mM), with MSM (100 mM) as an internal standard, at pH 8.5, room temperature.



Coupling of **1** with L-alanine **2<sub>A</sub>** catalyzed by **6f** at room temperature

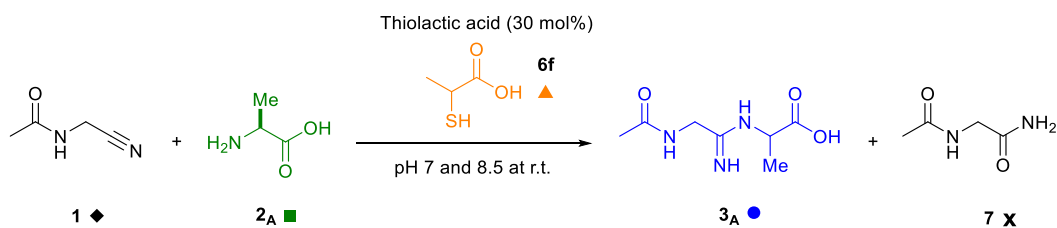

N-Acetylglycine nitrile (**1**, 200 mM), L-alanine (**2<sub>A</sub>**, 220 mM), and thiolactic acid (**6f**, 30 mol%, 60 mM) and MSM (100 mM) as an internal standard were dissolved in H<sub>2</sub>O/D<sub>2</sub>O (9:1, 0.8 mL). The pH of the solution was adjusted to the desired value with 4 M HCl/NaOH, the solution volume was increased to 1 mL and NMR spectra were obtained periodically.

| Entry | Time //h | <b>3<sub>A</sub></b> /% |
|-------|----------|-------------------------|
| 1     | 1        | 1                       |
| 2     | 12       | 4.3                     |
| 3     | 24       | 8.3                     |
| 4     | 36       | 11                      |
| 5     | 48       | 14                      |
| 7     | 72       | 20                      |
| 8     | 96       | 25                      |
| 9     | 120      | 29                      |

**Table S12.** Coupling of N-acetyl glycine nitrile (**1**) with L-alanine (**2<sub>A</sub>**) catalyzed by 2-mercaptopropionic acid (**6f**) at pH = 7, at room temperature

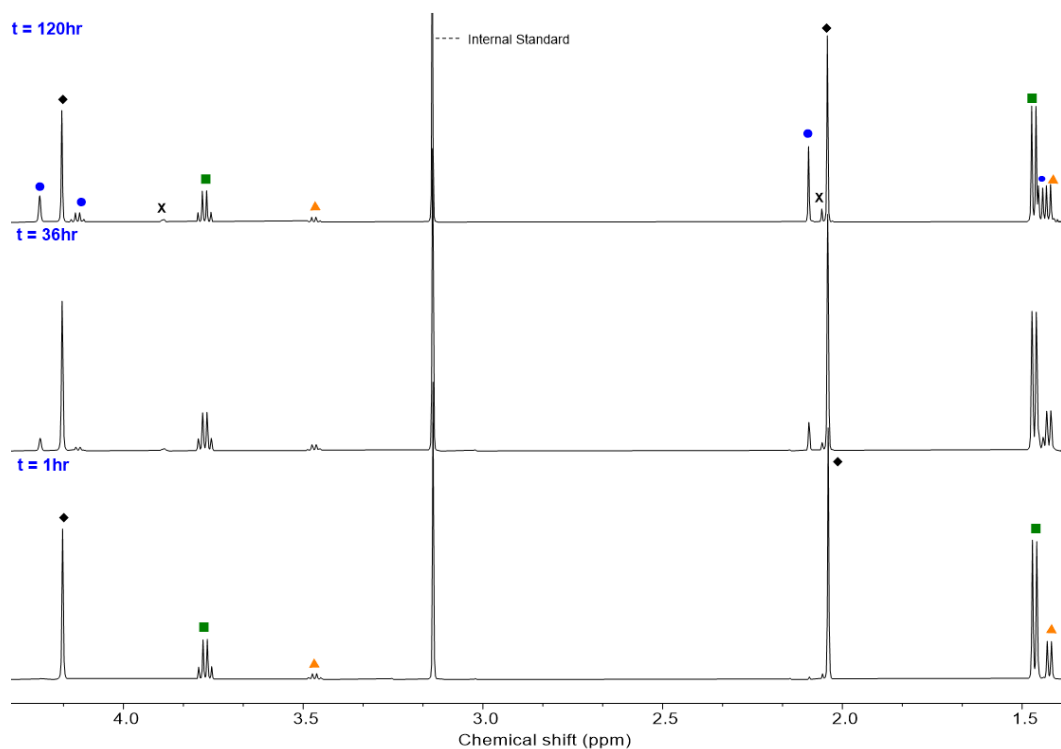

**Figure S9:** <sup>1</sup>H NMR (600 MHz, H<sub>2</sub>O/D<sub>2</sub>O 9:1, noesygppr1d, 1.4-4.3 ppm) spectrum to show the reaction of N-acetyl glycine nitrile (**1**, 200 mM) with L-alanine (**2<sub>A</sub>**, 220 mM) and 2-mercaptopropionic acid (**6f**, 60 mM), with MSM (100 mM) as an internal standard at pH 7, room temperature.

| Entry | Time /h | 3 <sub>A</sub> /% |
|-------|---------|-------------------|
| 1     | 1       | 8                 |
| 2     | 12      | 34                |
| 3     | 24      | 49                |
| 4     | 36      | 60                |
| 5     | 48      | 67                |
| 7     | 72      | 73                |
| 8     | 96      | 77                |
| 9     | 120     | 79                |

**Table S13:** Coupling of N-acetyl glycine nitrile (**1**) with L-alanine (**2<sub>A</sub>**) catalyzed by 2-mercaptopropionic acid (**6f**) at pH = 8.5, at room temperature

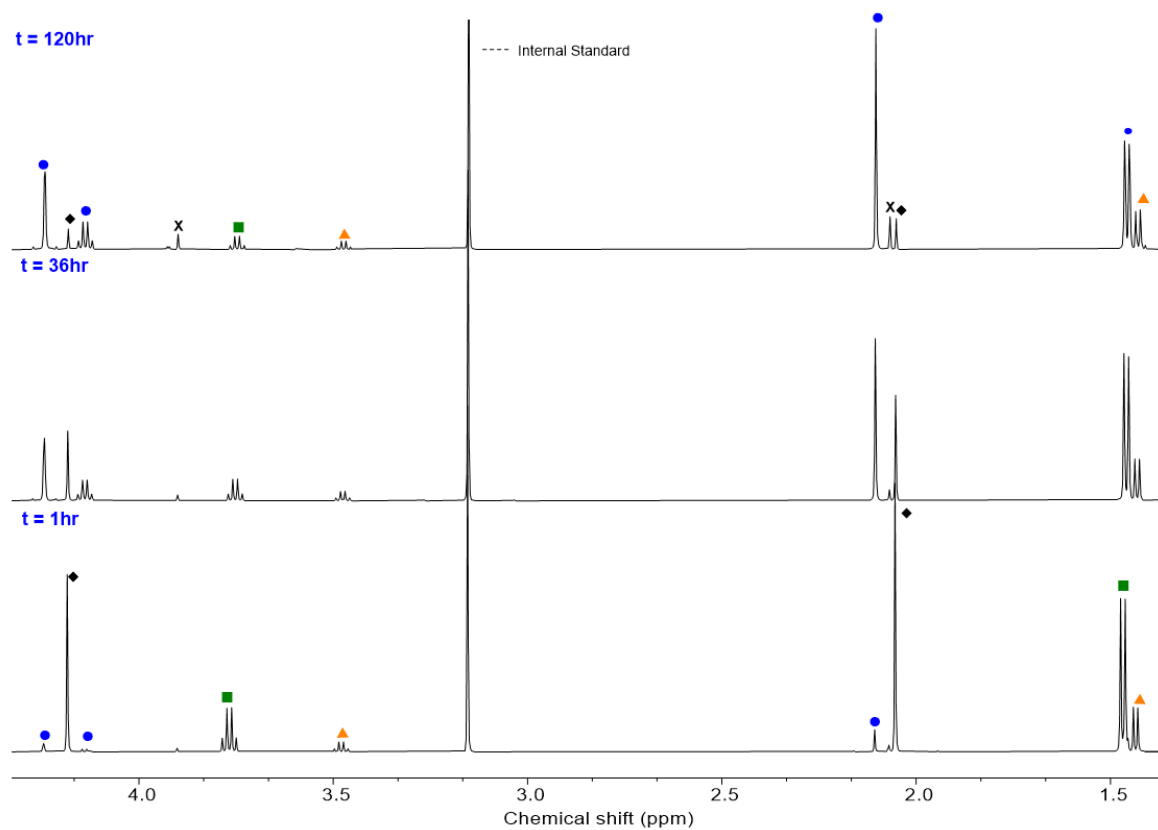

**Figure S10:** <sup>1</sup>H NMR (600 MHz, H<sub>2</sub>O/D<sub>2</sub>O 9:1, noesygppr1d, 1.4-4.3 ppm) spectrum to show the reaction of N-acetyl glycine nitrile (**1**, 200 mM) with L-alanine (**2<sub>A</sub>**, 220 mM) and 2-mercaptopropionic acid (**6f**, 60 mM), with MSM (100 mM) as an internal standard, at pH 8.5, room temperature.

Coupling of **1** with L-alanine **2<sub>A</sub>** catalyzed by **6g** at room temperature

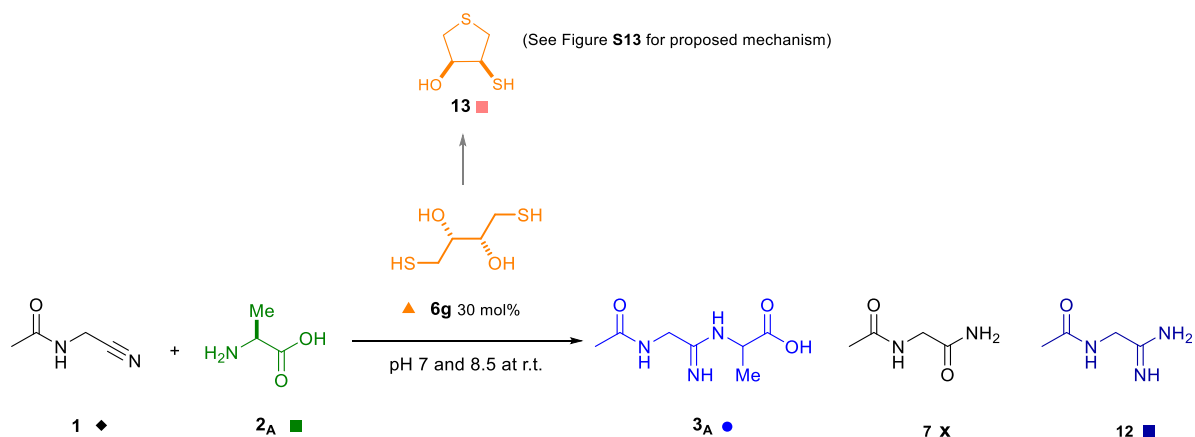

N-Acetylglycine nitrile (**1**, 200 mM), L-alanine (**2<sub>A</sub>**, 220 mM), and dithiothreitol (**6g**, 30 mol%, 60 mM) and MSM (100 mM) as internal standard were dissolved in H<sub>2</sub>O/D<sub>2</sub>O (9:1, 0.8 mL). The pH of the solution was adjusted to the desired value with 4 M HCl/NaOH, the solution volume was increased to 1 mL and NMR spectra were obtained periodically.

<sup>1</sup>H NMR (600 MHz, H<sub>2</sub>O/D<sub>2</sub>O 9:1) *cis*-4-Hydroxy-3-mercaptopentahydrothiophene, **13** (■): 2.77 (1H, t, *J* = 10.3 Hz, -SCHHCHSH), 2.87 (1H, dd, *J* = 11.7, 2.8 Hz, -SCHHCHOH), 3.09 (1H, dd, *J* = 11.7, 2.8 Hz, -SCHHCHOH), 3.16 (1H, dd, *J* = 10.3, 6.6 Hz, -SCHHCHSH), 3.38 (1H, ddd, *J* = 10.0, 6.8, 3.3 Hz, -SCHHCHSH), 4.41 – 4.34 (1H, m, -SCHHCHOH). The data is consistent with literature characterisation of **15**.<sup>2</sup>

| Entry | Time /h | <b>3<sub>A</sub></b> / % | <b>7</b> / % | <b>12</b> / % |
|-------|---------|--------------------------|--------------|---------------|
| 1     | 6       | 35                       | 10           | 5             |
| 2     | 12      | 50                       | 15           | 8             |
| 3     | 24      | 58                       | 19           | 9             |
| 4     | 36      | 60                       | 20           | 9.5           |
| 5     | 72      | 65                       | 22           | 9.5           |
| 7     | 96      | 68                       | 23           | 7.6           |
| 8     | 120     | 68                       | 23           | 7.6           |

**Table S14.** Coupling of N-acetyl glycine nitrile (**1**) with L-alanine (**2<sub>A</sub>**) catalyzed by dithiothreitol (**6g**) at pH = 7, at room temperature

| Entry | Time /h | <b>3<sub>A</sub></b> / % | <b>7</b> / % | <b>10</b> / % |
|-------|---------|--------------------------|--------------|---------------|
| 1     | 1       | 12                       | 4.5          | 0             |
| 2     | 12      | 50                       | 17           | 6             |
| 3     | 24      | 61                       | 21           | 7             |
| 4     | 36      | 65                       | 23           | 6             |
| 5     | 72      | 68                       | 24           | 6             |
| 7     | 96      | 68                       | 24           | 6.3           |
| 8     | 120     | 69                       | 25           | 6             |

**Table S15.** Coupling of N-acetyl glycine nitrile (**1**) with alanine (**2<sub>A</sub>**) catalyzed by dithiothreitol (**6g**) at pH = 8.5, at room temperature

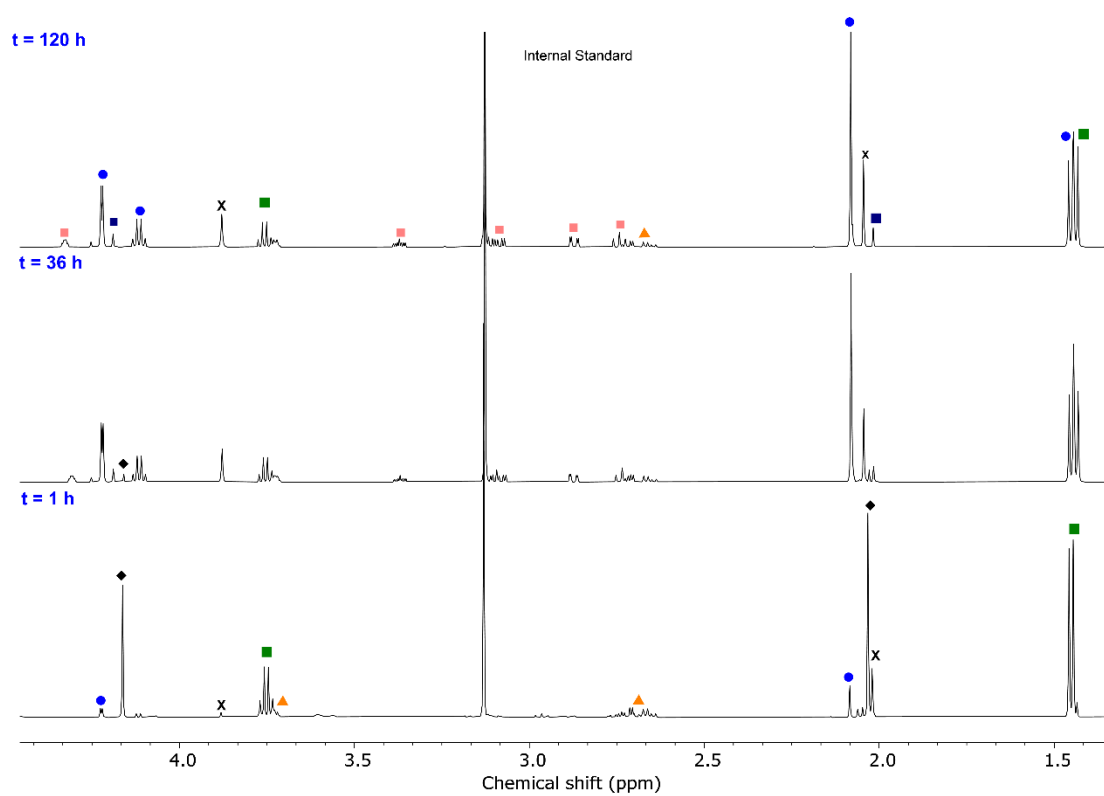

**Figure S11:** <sup>1</sup>H NMR (600 MHz, H<sub>2</sub>O/D<sub>2</sub>O 9:1, noesygppr1d, 1.4-4.3 ppm) spectrum to show the reaction of N-acetyl glycine nitrile (**1**, 200 mM) with L-alanine (**2a**, 240 mM) and dithiothreitol (**6g**, 60 mM), with MSM (100 mM) as an internal standard, at pH 8.5, room temperature.

### Thiol-Catalyst

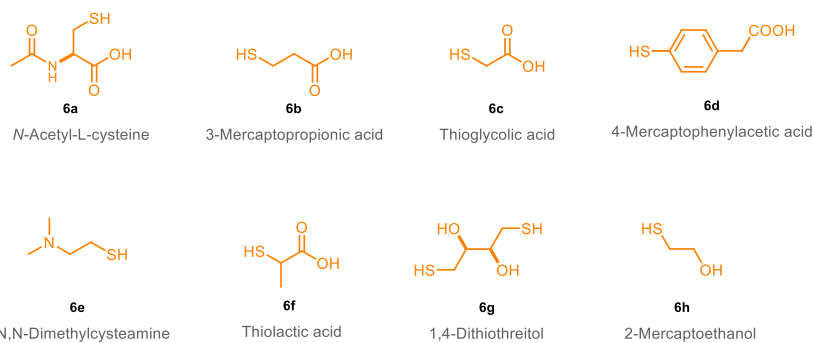

| Entry | thiol catalyst | pH  | Time to max yield / h | <b>3<sub>A</sub></b> / % | <b>7</b> / % |
|-------|----------------|-----|-----------------------|--------------------------|--------------|
| 1     | <b>6a</b>      | 7   | 196                   | 84                       | 5            |
| 2     | <b>6b</b>      | 7   | 196                   | 88                       | 4            |
| 3     | <b>6c</b>      | 7   | 120                   | 92                       | 4            |
| 4     | <b>6d</b>      | 7   | 168                   | 50                       | 3            |
| 5     | <b>6e</b>      | 7   | 120                   | 52                       | 23           |
| 6     | <b>6f</b>      | 7   | 120                   | 29                       | 5            |
| 7     | <b>6g</b>      | 7   | 36                    | 70                       | 19           |
| 8     | <b>6a</b>      | 8.5 | 120                   | 84                       | 7            |
| 9     | <b>6b</b>      | 8.5 | 48                    | 92                       | 4            |
| 10    | <b>6c</b>      | 8.5 | 48                    | 87                       | 4            |
| 11    | <b>6d</b>      | 8.5 | 168                   | 18                       | 2            |
| 12    | <b>6e</b>      | 8.5 | 120                   | 65                       | 11           |
| 13    | <b>6f</b>      | 8.5 | 96                    | 78                       | 7            |
| 14    | <b>6g</b>      | 8.5 | 48                    | 70                       | 23           |

**Table S16.** Comparison of final yields for coupling of **1** and **2<sub>A</sub>** catalyzed by different thiols.

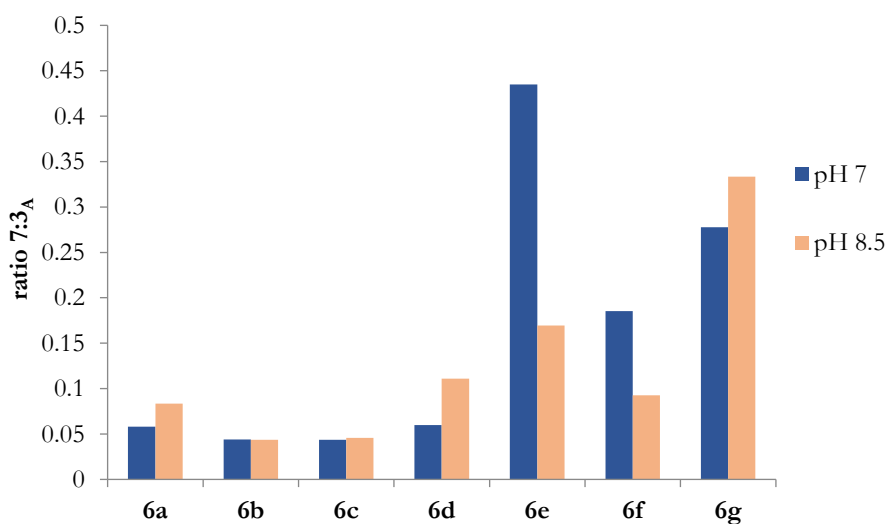

**Figure S12:** The effect of different thiol catalysts on selectivity in the reaction between **1** and **2<sub>A</sub>**. Ratios of hydration:ligation are taken at the point of maximum yield for each reaction (see Table S16).

With **6g** as catalyst, despite showing fast and relatively high yielding formation of **3<sub>A</sub>**, an unusually high yield of the hydration product **7** was observed, alongside disappearance of the <sup>1</sup>H NMR signals for **6g** at 2.7 ppm. The product

derived from **6g** is consistent with literature data for substituted tetrahydrothiophene **13**. We propose that formation of this species occurs alongside hydration, via a mechanism such as the one shown in figure **S12** which proceeds through thioimide formation, S-to-O acyl transfer, substitution of the resulting isoamide via formation of a 3-membered thiirane formation adjacent thiol, and finally nucleophilic attack by the second thiol to form a more stable 5-membered ring.

To probe this mechanism further we investigated a simpler thiol, 2-mercaptoethanol **6h**. This thiol has the same 1,2 thiol-alcohol substitution pattern which should allow it to form a thiirane via this mechanism, but lacks the second thiol so thiirane should be visible by NMR.

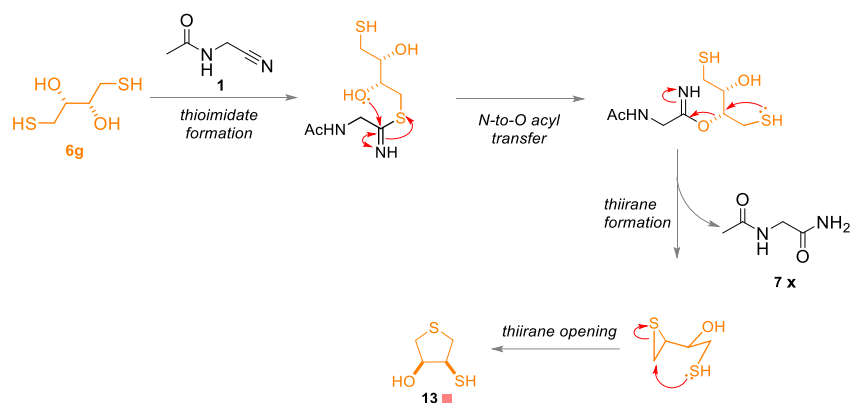

**Figure S13.** Proposed mechanism for dithiothreitol **6g**-mediated hydration N-acetyl Glycine nitrile **1** leading to formation of **13** and **7**

Coupling of **1** with L-alanine **2<sub>A</sub>** catalyzed by **6h** at room temperature

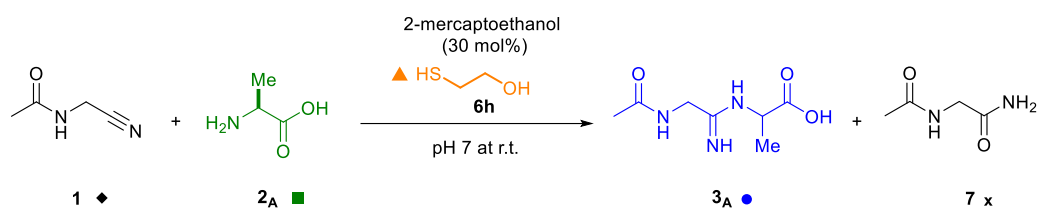

N-Acetylglycine nitrile (**1**, 200 mM), L-alanine (**2<sub>A</sub>**, 220 mM), and 2-mercaptoethanol (**6h**, 30 mol%, 60 mM) were dissolved in H<sub>2</sub>O/D<sub>2</sub>O (9:1, 0.8 mL) along with MSM (14 mM) as internal standard. The pH of the solution was adjusted to the desired value with 4 M HCl/NaOH, the solution volume was increased to 1 mL and NMR spectra were obtained periodically.

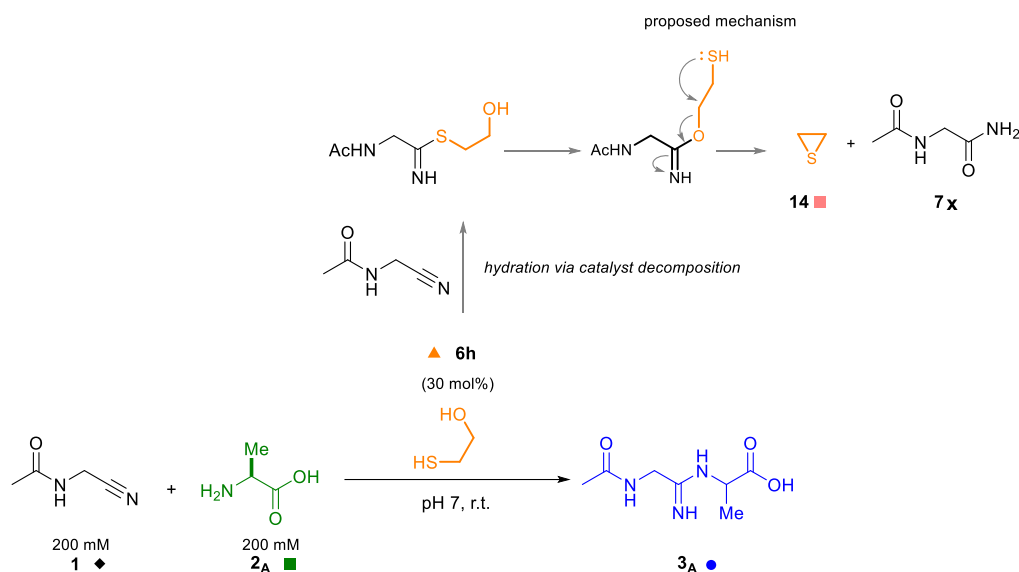

| Entry          | time / h  | <b>1</b> / % | <b>3<sub>A</sub></b> / % | <b>7</b> / % |
|----------------|-----------|--------------|--------------------------|--------------|
| 1              | 1         | 89           | 0                        | 5            |
| 2              | 5         | 82           | 1                        | 12           |
| 3              | 8         | 77           | 1                        | 17           |
| 4              | 16        | 67           | 2                        | 26           |
| 5 <sup>a</sup> | <b>24</b> | <b>62</b>    | <b>3</b>                 | <b>30</b>    |
| 6              | 36        | 58           | 6                        | 31           |
| 7              | 48        | 57           | 7                        | 31           |
| 8              | 72        | 53           | 10                       | 31           |
| 9              | 120       | 52           | 12                       | 32           |

**Table S17.** Yields over time for the reaction between N-acetyl glycine nitrile (**1**, 200 mM) with L-alanine (**2<sub>A</sub>**, 200 mM) and 2-mercaptoethanol (**6h**, 60 mM) at pH 7.0, room temperature. <sup>a</sup> At this time **6h** was no longer visible by <sup>1</sup>H NMR (see Figure S14)

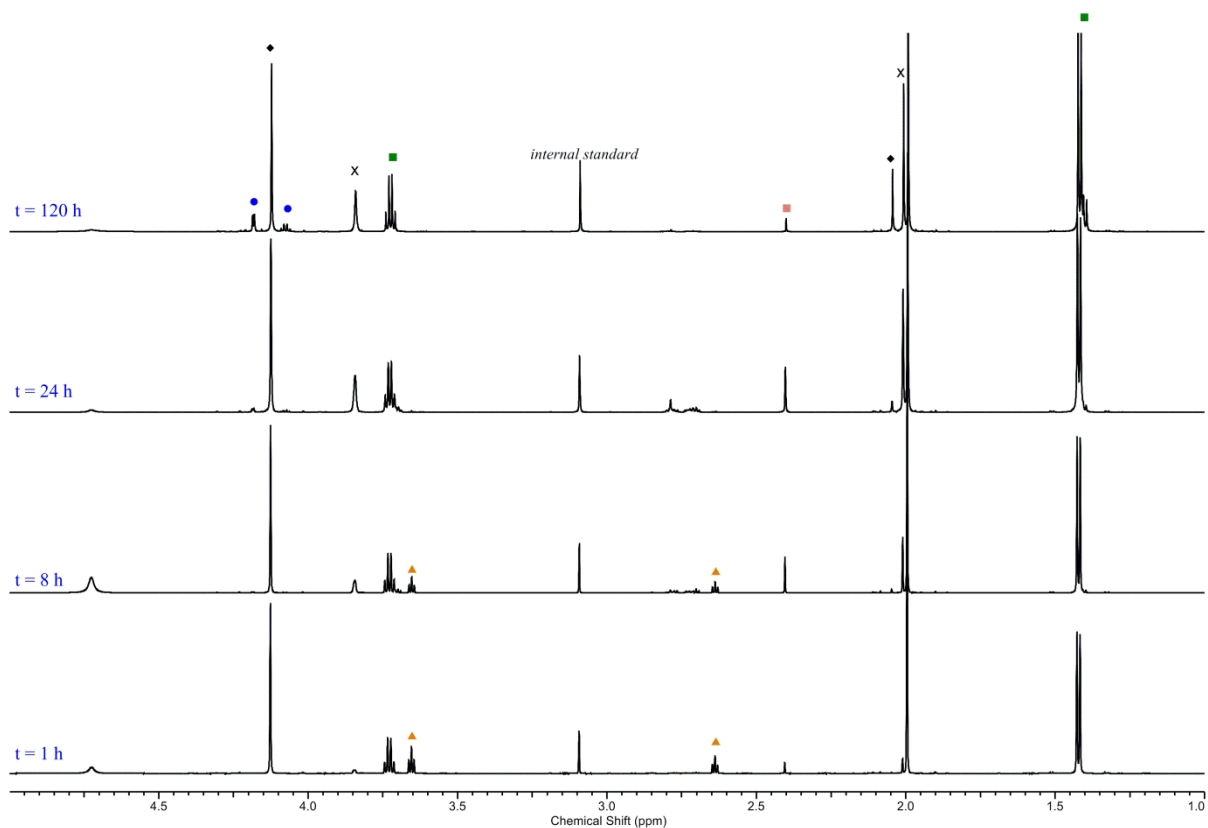

**Figure S14:**  $^1\text{H}$  NMR (700 MHz,  $\text{H}_2\text{O}/\text{D}_2\text{O}$  9:1, noesygppr1d, 1.0-5.0 ppm) spectrum to show the reaction of N-acetyl glycine nitrile (**1**, 200 mM) with L-alanine (**2<sub>A</sub>**, 220 mM) and 2-mercaptoethanol (**6h**, 60 mM) with MSM (7 mM) as an internal standard, at pH 7.0, room temperature.

**6h** is not an effective catalyst for the coupling between **1** and **2<sub>A</sub>** at pH 7. Instead, **6h** promotes hydration of **1** to yield **7**. **6h** is completely consumed (>99% by NMR spectroscopy) after 24 h. The formation of thiirane **14** (2.4 ppm) is observed, alongside further thiol-derived signals at 2.6-2.8 and 3.7-3.8 ppm. After full consumption of **6h** (24 h), ligation between **1** and **2<sub>A</sub>** occurs, suggesting that the thiol-derived products of **6h** degradation are competent catalysts (see Table S6, entries 5-9).

To further demonstrate that hydration of **1** is linked to decomposition of **6h** via formation of thiirane **14** we investigated the reaction between **6h** and **1**.



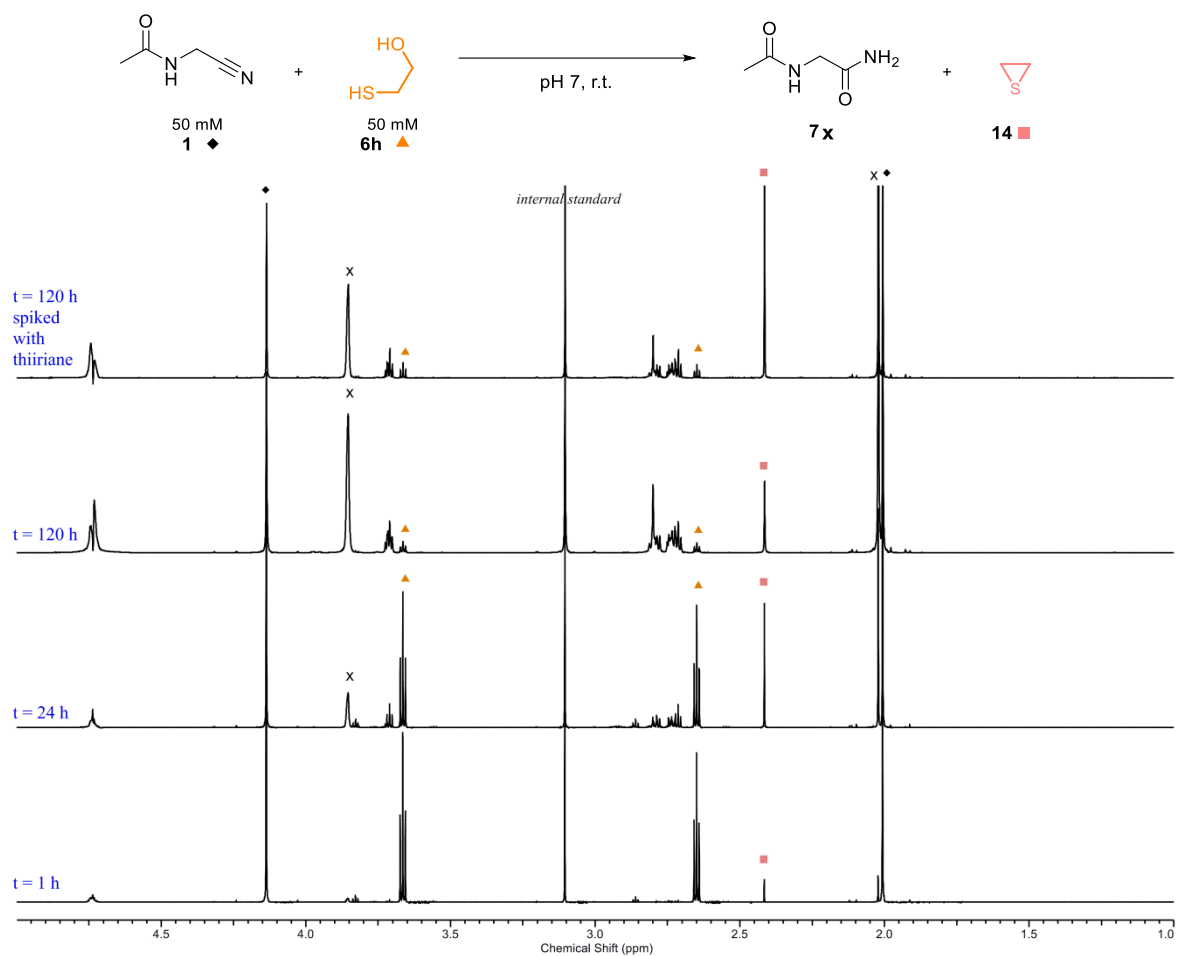

**Figure S15:** <sup>1</sup>H NMR (700 MHz, H<sub>2</sub>O/D<sub>2</sub>O 9:1, noesygppr1d, 1.0-5.0 ppm) spectrum to show the reaction of N-acetyl glycine nitrile (**1**, 50 mM) with 2-mercaptoethanol (**6h**, 50 mM) with MSM (7 mM) as an internal standard, at pH 7.0, room temperature. Formation of thiirane **14** was confirmed by spiking with an authentic sample (10 mM).

**6h** and **1** react to form the hydration product **7** and thiirane **14**, alongside further thiol-derived products that seem to derive from the addition of **6h** to **14**.

Coupling of *N*-acetyl glycine nitrile **1** with  $\alpha$ -amino acids **2** at pH 8.5 and room temperature

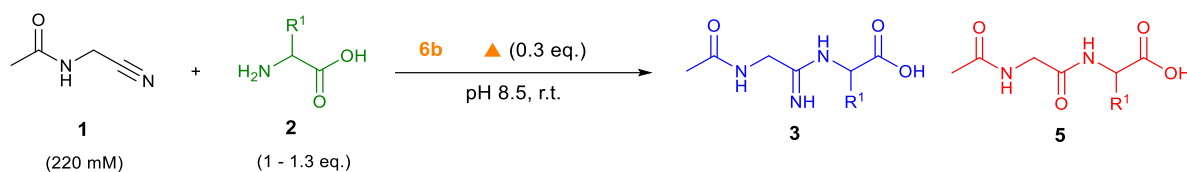

| Amino acid<br><b>2</b>                      | Yield /%          |                  | HRMS-ESI for amidines <b>3</b>                                                    |             |          |
|---------------------------------------------|-------------------|------------------|-----------------------------------------------------------------------------------|-------------|----------|
|                                             | <b>3</b> ●        | <b>5</b> ▼       | Formula                                                                           | Theoretical | Found    |
| Gly, <b>2<sub>G</sub></b>                   | >95%              | ----             | C <sub>6</sub> H <sub>12</sub> N <sub>3</sub> O <sub>5</sub> [M+H] <sup>+</sup>   | 174.0874    | 174.0874 |
| L-Ala, <b>2<sub>A</sub></b>                 | 87%               | ----             | C <sub>7</sub> H <sub>14</sub> N <sub>3</sub> O <sub>5</sub> [M+H] <sup>+</sup>   | 188.1030    | 188.1027 |
| L-Arg <sup>[a]</sup> , <b>2<sub>R</sub></b> | 91%               | ----             | C <sub>10</sub> H <sub>21</sub> N <sub>6</sub> O <sub>3</sub> [M+H] <sup>+</sup>  | 273.1670    | 273.1669 |
| L-Asn <sup>[a]</sup> , <b>2<sub>N</sub></b> | 40% <sup>b</sup>  | 53%              | C <sub>8</sub> H <sub>14</sub> N <sub>3</sub> O <sub>5</sub> [M+H] <sup>+</sup>   | 232.0928    | 232.0933 |
| L-Asp, <b>2<sub>D</sub></b>                 | 91%               | ----             | C <sub>8</sub> H <sub>14</sub> N <sub>3</sub> O <sub>5</sub> [M+H] <sup>+</sup>   | 232.0928    | 232.0931 |
| L-Gln <sup>[a]</sup> , <b>2<sub>Q</sub></b> | 90%               | ----             | C <sub>9</sub> H <sub>17</sub> N <sub>4</sub> O <sub>4</sub> [M+H] <sup>+</sup>   | 245.1245    | 245.1244 |
| L-Glu, <b>2<sub>E</sub></b>                 | 90%               | ----             | C <sub>9</sub> H <sub>16</sub> N <sub>3</sub> O <sub>5</sub> [M+H] <sup>+</sup>   | 246.1084    | 246.1086 |
| L-His, <b>2<sub>H</sub></b>                 | 93%               | ----             | C <sub>10</sub> H <sub>16</sub> N <sub>5</sub> O <sub>3</sub> [M+H] <sup>+</sup>  | 254.1248    | 254.1249 |
| L-Ile <sup>[a]</sup> , <b>2<sub>I</sub></b> | 86%               | ----             | C <sub>10</sub> H <sub>20</sub> N <sub>3</sub> O <sub>3</sub> [M+H] <sup>+</sup>  | 230.1499    | 230.1498 |
| L-Leu, <b>2<sub>L</sub></b>                 | 84%               | ----             | C <sub>10</sub> H <sub>20</sub> N <sub>3</sub> O <sub>3</sub> [M+H] <sup>+</sup>  | 230.1499    | 230.1498 |
| L-Lys <sup>[a]</sup> , <b>2<sub>K</sub></b> | >90% <sup>c</sup> | ----             | C <sub>10</sub> H <sub>21</sub> N <sub>4</sub> O <sub>3</sub> [M+H] <sup>+</sup>  | 245.1068    | 245.1067 |
| DL-Met, <b>2<sub>M</sub></b>                | 89%               | ----             | C <sub>9</sub> H <sub>18</sub> N <sub>3</sub> O <sub>3</sub> S [M+H] <sup>+</sup> | 248.1063    | 248.1064 |
| L-Phe, <b>2<sub>F</sub></b>                 | 86%               | ----             | C <sub>13</sub> H <sub>18</sub> N <sub>3</sub> O <sub>3</sub> [M+H] <sup>+</sup>  | 264.1343    | 264.1343 |
| L-Pro, <b>2<sub>P</sub></b>                 | 83%               | ----             | C <sub>9</sub> H <sub>16</sub> N <sub>3</sub> O <sub>3</sub> [M+H] <sup>+</sup>   | 214.1187    | 214.1196 |
| L-Ser, <b>2<sub>S</sub></b>                 | ----              | 95% <sup>d</sup> | C <sub>7</sub> H <sub>12</sub> N <sub>2</sub> O <sub>5</sub> [M+Na] <sup>+</sup>  | 227.0638    | 227.0643 |
| L-Thr <sup>[a]</sup> , <b>2<sub>T</sub></b> | ----              | 93% <sup>e</sup> | C <sub>8</sub> H <sub>15</sub> N <sub>2</sub> O <sub>5</sub> [M+H] <sup>+</sup>   | 219.0976    | 219.0979 |
| L-Trp <sup>[a]</sup> , <b>2<sub>W</sub></b> | 83% <sup>f</sup>  | ----             | C <sub>15</sub> H <sub>19</sub> N <sub>4</sub> O <sub>3</sub> [M+H] <sup>+</sup>  | 303.1452    | 303.1451 |
| L-Val <sup>[a]</sup> , <b>2<sub>V</sub></b> | 93%               | ----             | C <sub>9</sub> H <sub>16</sub> N <sub>3</sub> O <sub>3</sub> [M+H] <sup>+</sup>   | 216.1343    | 216.1339 |

**Table S18:** Yields and ESI-HRMS data for 3-mercaptopropanoic acid (**6b**, 60 mM) ▲ catalyzed formation of amidine **3** ● and peptide **5** ▼ from the coupling of *N*-acetyl glycine nitrile (**1**, 200 mM) with amino acid ■ (**2**, 1.0 - 1.3 equiv.) at pH 8.5, room temperature, after 24 h, unless stated otherwise.

<sup>a</sup> Valine **2<sub>V</sub>**, isoleucine **2<sub>I</sub>**, arginine **2<sub>R</sub>**, lysine **2<sub>K</sub>**, glutamine **2<sub>Q</sub>**, tryptophan **2<sub>W</sub>**, threonine **2<sub>T</sub>**, and asparagine **2<sub>N</sub>** were poorly soluble in water, therefore each was dissolved with NaOH (1 equiv.) and then adjusted to pH 9 with HCl. An aliquot of pH 9 amino acid solution was used in each ligation reaction. The ligation reaction pH was adjusted to the desired pH at  $t = 0$ .

<sup>b</sup> The reaction progress was monitored for 5 days to ensure that all in situ formed intermediates were hydrolysed to **5<sub>N</sub>** and **3<sub>D</sub>**. **8** is observed to form from **3<sub>N</sub>**, and was detected in the first NMR acquired ( $t = 12$  h). **Figure S22** depicts the progression of the reaction.

<sup>c</sup> Combined yield for the  $N^2$ ,  $N^6$ , and  $N^2,N^6$ -bis-acyl coupling products reported: ( $N^2$ -(Ac-Gly<sup>N</sup>)-Lys-OH, plus  $N^2,N^6$ -bis(Ac-Gly<sup>N</sup>)-Lys-OH (62%) and  $N^6$ -(Ac-Gly<sup>N</sup>)-Lys-OH plus  $N^2,N^6$ -bis(Ac-Gly<sup>N</sup>)-Lys-OH (32%). **Figure S37**

<sup>d</sup> An intermediate oxazole, 2-(acetamidomethyl)-4,5-dihydrooxazole-4-carboxylic acid, **9<sub>S</sub>** (55% at 24 h) was observed, after complete consumption of **1**, the reaction mixture was heated at 60 °C for 12 h, and complete conversion of **9<sub>S</sub>** to **5<sub>S</sub>** was observed. **Figure S45**.

<sup>e</sup> An intermediate oxazole, (2-(acetamidomethyl)-5-methyl-4,5-dihydrooxazole-4-carboxylic acid **9<sub>T</sub>** (67% at 24 h) was observed. The reaction mixture was incubated at 60 °C for 12 h and hydrolysis of **9<sub>T</sub>** to **5<sub>T</sub>** was observed. **Figure S49**.

<sup>f</sup> L-Tryptophan **2<sub>W</sub>** exhibits low solubility in water, therefore after dissolving all the substrates reaction mixture was heated for 10 mins (temperature approx. ~60 °C). Afterwards reaction progress was followed by NMR at room temperature. No further attempts were made to optimise **2<sub>W</sub>** coupling.

Coupling of **1** with L-alanine **2<sub>A</sub>** at pH 8.5 and room temperature

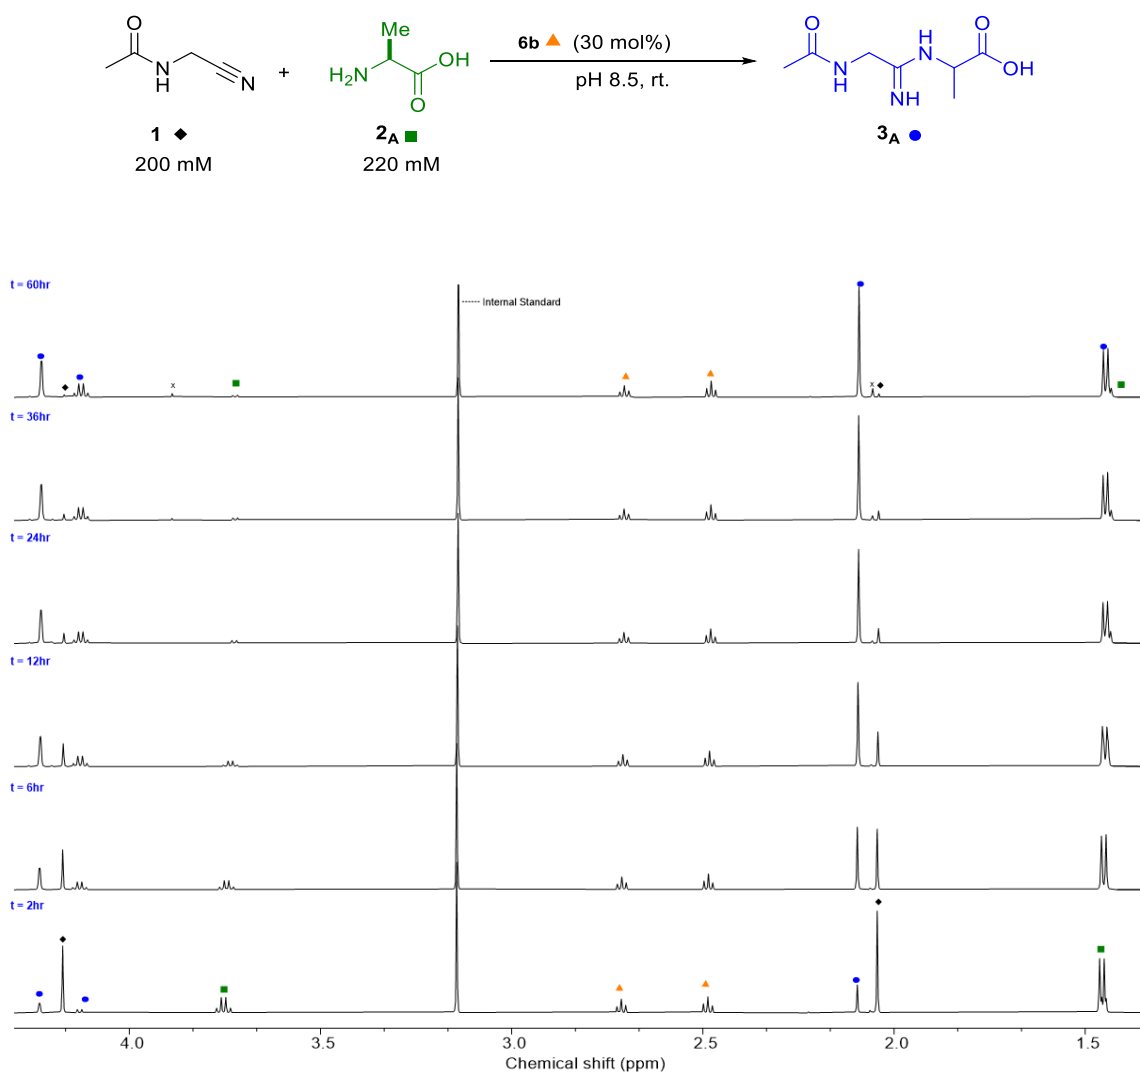

**Figure S16:** <sup>1</sup>H NMR (600 MHz, H<sub>2</sub>O/D<sub>2</sub>O 9:1, noesygppr1d, 1.4-4.3 ppm) spectrum to show the reaction of N-acetyl glycine nitrile (**1**, 200 mM) with L-alanine (**2<sub>A</sub>**, 220 mM) and 3-mercaptopropanoic acid (**6b**, 60 mM), with MSM (100 mM) as an internal standard, at pH 8.5, room temperature.

<sup>1</sup>H NMR (600 MHz, H<sub>2</sub>O/D<sub>2</sub>O 9:1) (2-acetamido-1-iminoethyl)-L-alanine, **3<sub>A</sub>** (●): δ<sub>H</sub> 4.26 (1H, AB, *J* = 17.2 Hz, AcNHCHH), 4.22 (1H, AB, *J* = 17.2 Hz, AcNHCHH), 4.11 (1H, q, *J* = 7.1 Hz, CH(CH<sub>3</sub>)), 2.10 (3H, s, H<sub>3</sub>C(CO)), 1.46 (3H, d, *J* = 7.2 Hz, CH(CH<sub>3</sub>)); L-alanine, **2<sub>A</sub>** (■): δ<sub>H</sub> 3.78 (1H, q, *J* = 7.2 Hz, CH(CH<sub>3</sub>)), 1.47 (3H, d, *J* = 7.2 Hz, CH(CH<sub>3</sub>)); N-acetylglycinamide, **7** (✕) (partial assignment): δ<sub>H</sub> 3.89 (2H, d, CH<sub>2</sub>).

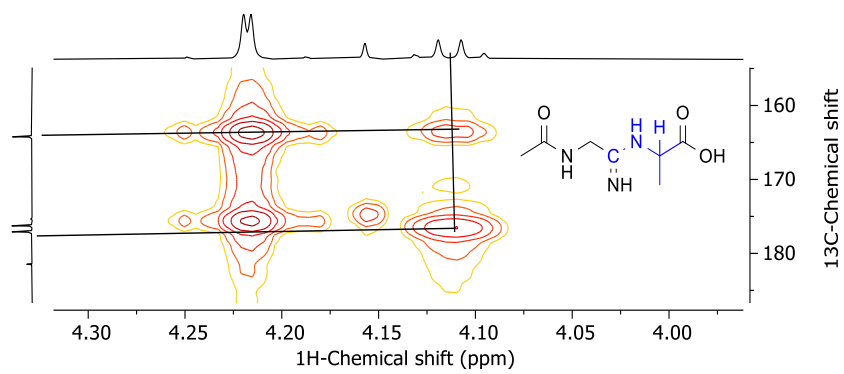

**Figure S17:**  $^1\text{H}$ - $^{13}\text{C}$  HMBC ( $^1\text{H}$ : 600 MHz [3.5-4.5 ppm],  $^{13}\text{C}$ : 176 MHz [150-185 ppm],  $\text{H}_2\text{O}/\text{D}_2\text{O}$  9:1) spectrum showing the diagnostic  $^2\text{J}_{\text{CH}}$  and  $^3\text{J}_{\text{CH}}$  coupling of **Ala- $\alpha\text{H}$ -COOH** in **3a** at 4.11 ppm with two resonances at 177.5 and 164.5 ppm, which is characteristic of amidine bond formation of **2a**.

Coupling of **1** with L-aspartic acid **2<sub>D</sub>** at pH 8.5 and room temperature

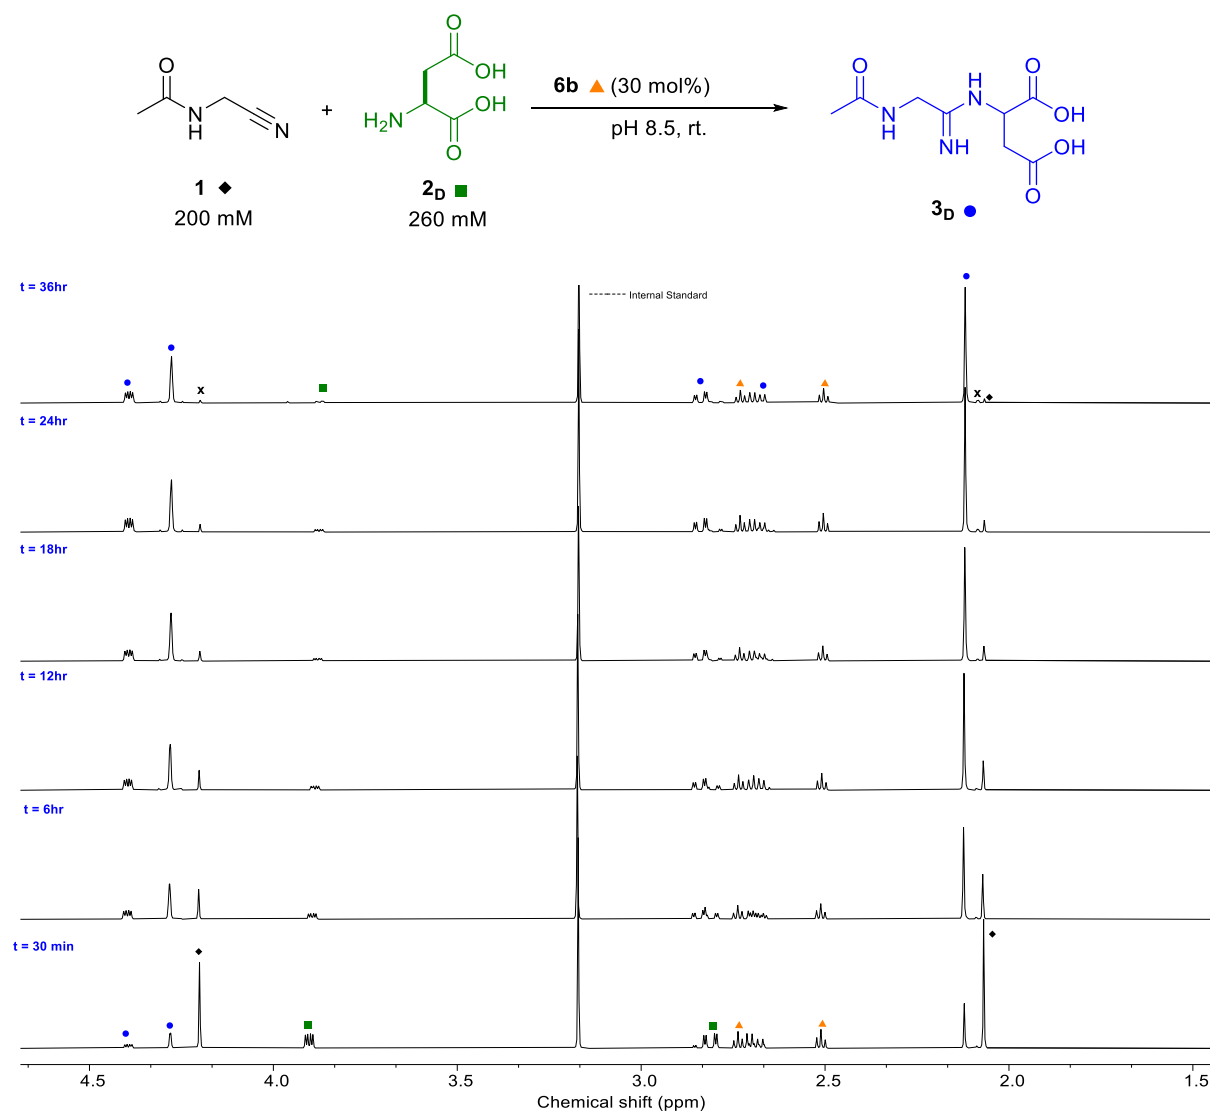

**Figure S18:**  $^1\text{H}$  NMR (600 MHz,  $\text{H}_2\text{O}/\text{D}_2\text{O}$  9:1, noesygppr1d, 1.0-5.0 ppm) spectrum to show the reaction of *N*-acetyl glycine nitrile (**1**, 200 mM) with L-aspartic acid (**2<sub>D</sub>**, 260 mM) and 3-mercaptopropanoic acid (**6b**, 60 mM) with MSM (100 mM) as an internal standard at pH 8.5 and room temperature.

$^1\text{H}$  NMR (600 MHz,  $\text{H}_2\text{O}/\text{D}_2\text{O}$  9:1, noesygppr1d) (*2*-acetamido-1-iminoethyl)aspartic acid, **3<sub>D</sub>** (●):  $\delta_{\text{H}}$  4.38 (1H, dd,  $J = 8.3, 3.7$  Hz, Asp- $\alpha$ H-COOH), 4.26 (1H, AB,  $J = 17.3$  Hz, AcNHCHH), 4.23 (1H, AB,  $J = 17.3$  Hz, AcNHCHH), 2.84 (1H, ABX,  $J = 16.6, 3.7$  Hz, CH(CHHCOOH)COOH), 2.66 (1H, ABX,  $J = 16.6, 8.3$  Hz, CH(CHHCOOH)COOH), 2.10 (3H, s,  $\text{H}_3\text{C}(\text{CO})$ ); L-aspartic acid, **2<sub>D</sub>** (■):  $\delta_{\text{H}}$  3.87 (1H, dd,  $J = 9.0, 3.8$  Hz,  $\alpha$ H-COOH), 2.78 (1H, ABX,  $J = 17.2, 3.8$  Hz, CH(CHHCOOH)COOH), 2.62 (1H, dd,  $J = 17.1, 9.0$  Hz, CH(CHHCOOH)COOH); *N*-acetyl glycine, **7** (×):  $\delta_{\text{H}}$  3.94 (2H, s,  $\text{CH}_2$ ).

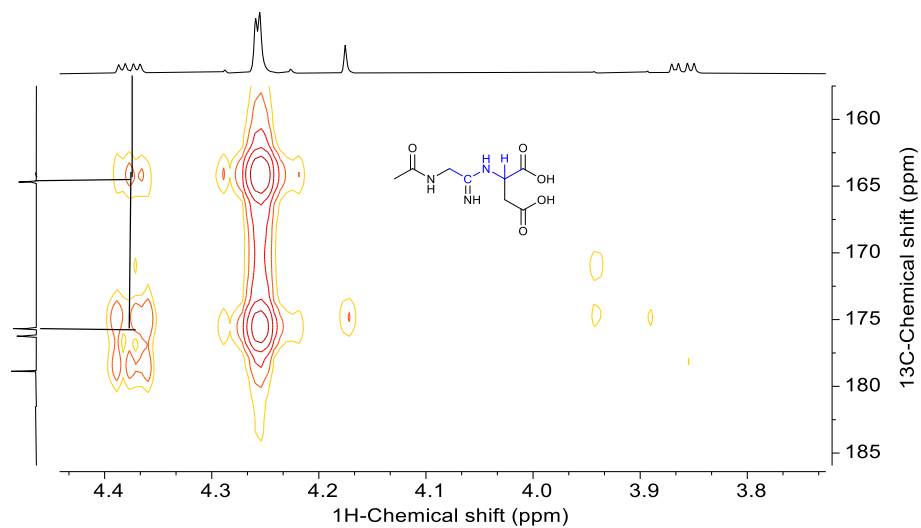

**Figure S19:**  $^1\text{H}$ - $^{13}\text{C}$  HMBC ( $^1\text{H}$ : 600 MHz [3.5-5.0 ppm],  $^{13}\text{C}$ : 176 MHz [160-185 ppm],  $\text{H}_2\text{O}/\text{D}_2\text{O}$  9:1) spectrum showing the diagnostic  $^2\text{J}_{\text{CH}}$  and  $^3\text{J}_{\text{CH}}$  coupling of the Asp- $\alpha\text{H}$ -COOH in **3d** at 4.37 ppm with two resonances at 175.6 and 165.4 ppm, which is characteristic of amidine bond formation of **2d**.

Coupling of **1** with L-arginine **2<sub>R</sub>** at pH 8.5 and room temperature

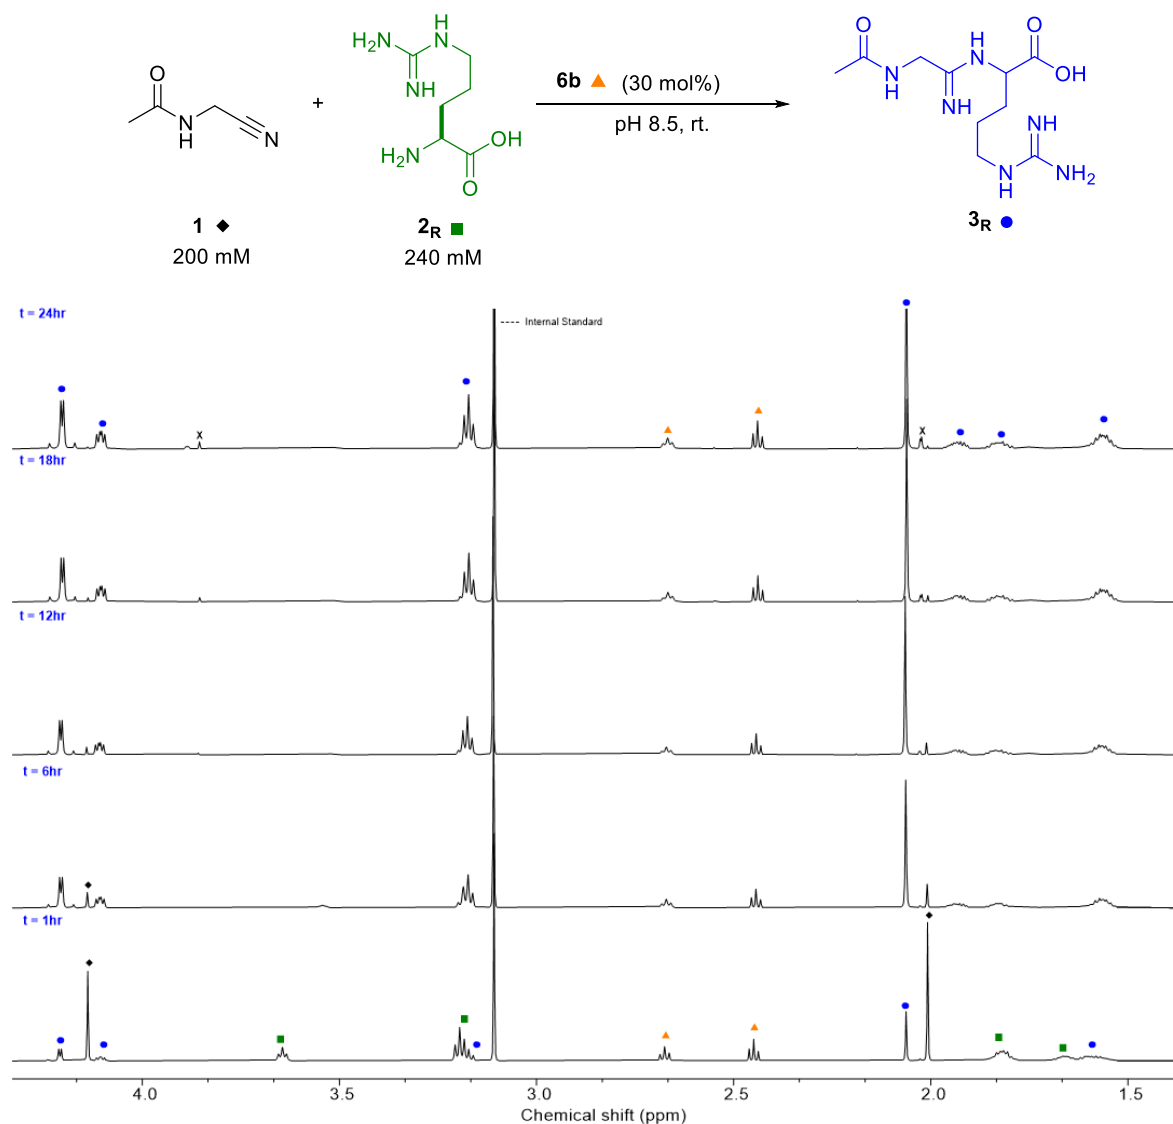

**Figure S20:**  $^1\text{H}$  NMR (600 MHz,  $\text{H}_2\text{O}/\text{D}_2\text{O}$  9:1, noesygppr1d, 1.0-5.0 ppm) spectrum to show the reaction of N-acetyl glycine nitrile (**1**, 200 mM) with L-arginine (**2<sub>R</sub>**, 240 mM) 3-mercaptopropanoic acid (**6b**, 60 mM) with (100 mM) as an internal standard, at pH 8.5 and room temperature.  $\times$  = N-acetylglycinamide, **7**.

$^1\text{H}$  NMR (600 MHz,  $\text{H}_2\text{O}/\text{D}_2\text{O}$  9:1, noesygppr1d) (*2-acetamido-1-iminoethyl*)arginine, **3<sub>R</sub>** (●) (partial assignment):  $\delta_{\text{H}}$  4.21 (1H, AB,  $J = 17.1$  Hz, AcNHCHH), 4.19 (1H, AB,  $J = 17.1$  Hz, AcNHCHH), 4.11 (1H, dd,  $J = 7.5, 4.7$  Hz, Arg- $\alpha$ -COOH), 3.17 (2H, t,  $J = 6.9$  Hz,  $\text{CH}_2$ (guanidyl)), 2.06 (3H, s,  $\text{H}_3\text{C}(\text{CO})$ ), 1.94 (1H, m, CHHCH<sub>2</sub>CH<sub>2</sub>(guanidyl)), 1.83 (1H, m, CHHCH<sub>2</sub>CH<sub>2</sub>(guanidyl)), 1.57 (2H, m, CH<sub>2</sub>CH<sub>2</sub>CH<sub>2</sub>(guanidyl)); L-arginine, **2<sub>R</sub>** (■) (partial assignment):  $\delta_{\text{H}}$  3.50 (1H, t,  $J = 5.6$  Hz,  $\alpha$ -H-COOH), 3.17 (2H, t,  $J = 7.0$  Hz,  $\text{CH}_2$ (guanidyl)); N-acetylglycinamide, **7** (×) (partial assignment):  $\delta_{\text{H}}$  3.88 (2H, s,  $\text{CH}_2$ ).

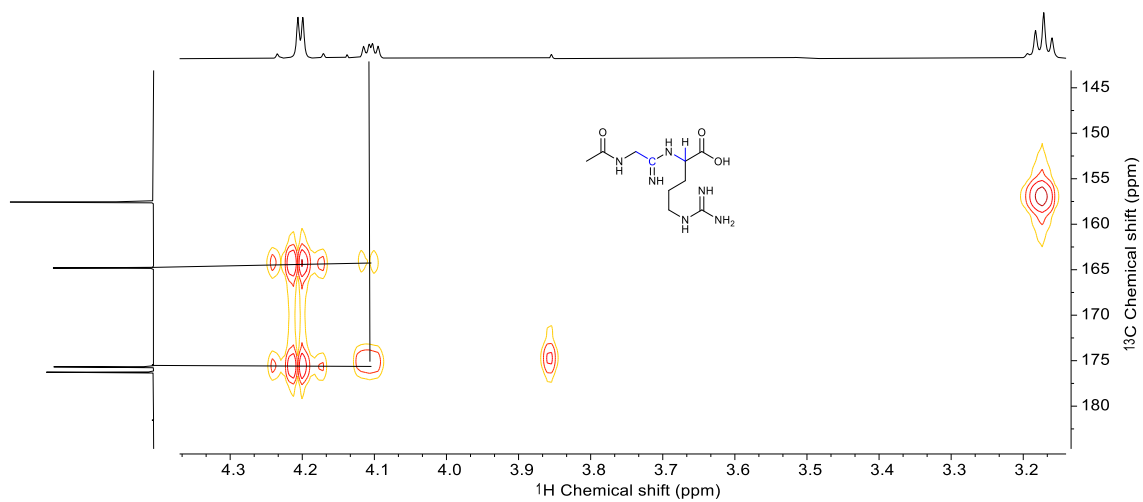

**Figure S21:**  $^1\text{H}$ - $^{13}\text{C}$  HMBC ( $^1\text{H}$ : 600 MHz [3.2-4.3 ppm],  $^{13}\text{C}$ : 176 MHz [145-185 ppm],  $\text{H}_2\text{O}/\text{D}_2\text{O}$  9:1) spectrum showing the diagnostic  $^2J_{\text{CH}}$  and  $^3J_{\text{CH}}$  coupling of Arg- $\alpha\text{H-COOH}$  in **3R** at 4.11 ppm with two resonances at 176.2 and 164.7 ppm, which is characteristic of amidine bond formation of **2R**.



Coupling of **1** with L-asparagine **2<sub>N</sub>** at pH 8.5 and room temperature

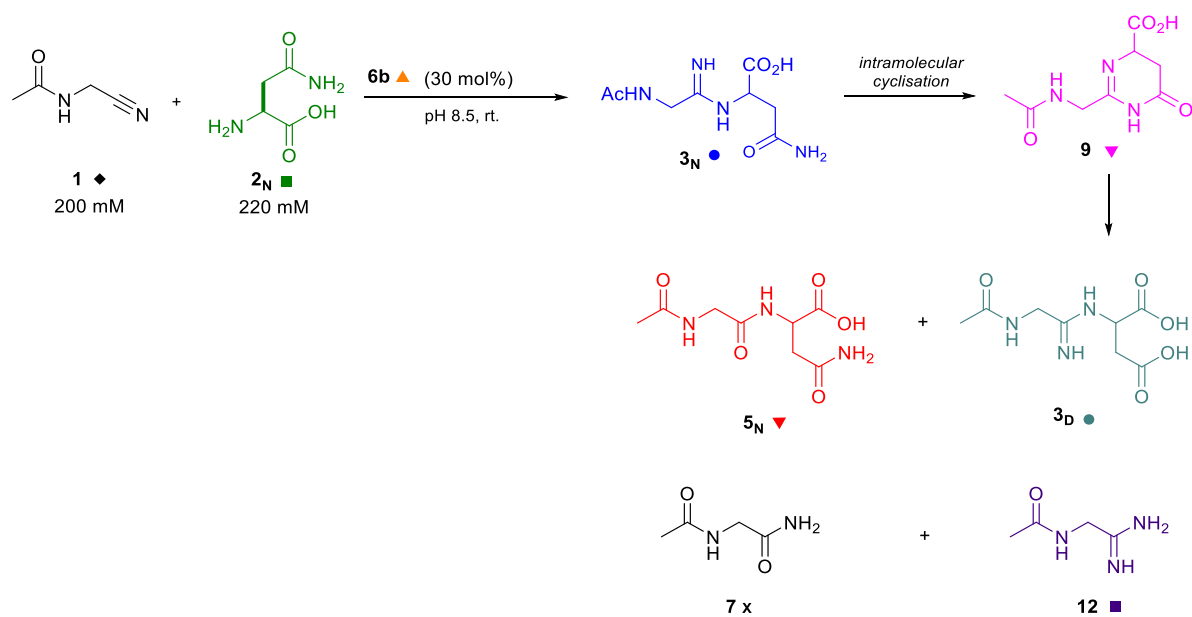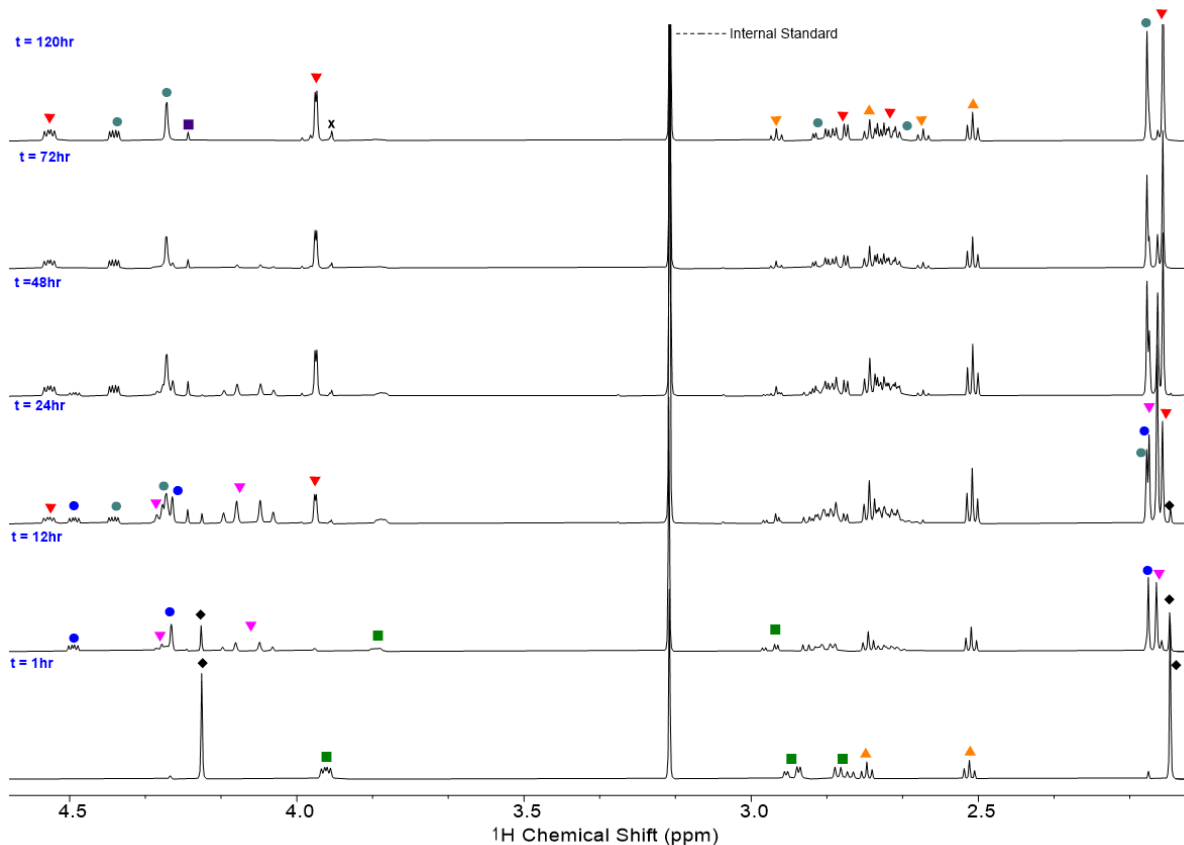

**Figure S22:** <sup>1</sup>H NMR (600 MHz, H<sub>2</sub>O/D<sub>2</sub>O 9:1, noesygppr1d, 1.0–5.0 ppm) spectrum to show the reaction of *N*-acetyl glycine nitrile (**1**, 200 mM) with L-asparagine (**2<sub>N</sub>**, 220 mM) and 3-mercaptopropanoic acid (MPA, 60 mM) with MSM (100 mM) as an internal standard at pH 8.5 and room temperature. **x** = **7** **■** = **12**.

Partial assignment for dihydropyrimidone **9** (▼): δ<sub>H</sub> 4.30 (1H, m, Asn-αH-COOH), 4.15 (1H, AB, *J* = 17.2 Hz, AcNHCHH), 4.07 (1H, AB, *J* = 17.2 Hz, AcNHCHH), 2.11 (3H, s, H<sub>3</sub>C(CO)).

$^1\text{H}$  NMR (600 MHz,  $\text{H}_2\text{O}/\text{D}_2\text{O}$  9:1, noesygppr1d) *N*-Acetylglycylasparagine, **5<sub>N</sub>** (▼):  $\delta_{\text{H}}$  4.54 (1H, dd,  $J = 8.5, 4.8$  Hz, Asn- $\alpha$ H-COOH), 3.94 (1H, AB,  $J = 17.1$  Hz, AcNHCHH), 3.91 (1H, AB,  $J = 17.1$  Hz, AcNHCHH), 2.80 (1H, ABX,  $J = 15.2, 4.8$  Hz, CH(CHHCONH<sub>2</sub>)COOH), 2.72 - 2.77 (1H, m, CH(CHHCONH<sub>2</sub>)COOH), 2.09 (3H, s,  $\text{H}_3\text{C}(\text{CO})$ ); (2-acetamido-1-iminoethyl)aspartic acid, **2<sub>N</sub>** (●):  $\delta_{\text{H}}$  4.40 (1H, dd,  $J = 8.1, 3.8$  Hz, Asp- $\alpha$ H-COOH), 4.29 (1H, AB,  $J = 17.2$  Hz, AcNHCHH), 4.24 (1H, AB,  $J = 17.2$  Hz, AcNHCHH), 2.85 (1H, ABX,  $J = 16.7, 3.8$  Hz, CH(CHHCOOH)COOH), 2.71-2.67 (1H, m, CH(CHHCOOH)COOH), 2.13 (3H, s,  $\text{H}_3\text{C}(\text{CO})$ ); *L*-asparagine, **2<sub>N</sub>** (■) (partial assignment):  $\delta_{\text{H}}$  3.82 (1H, dd,  $J = 8.3, 4.6$  Hz,  $\alpha$ H-COOH); *N*-acetylglycinamide, **7** (✕):  $\delta_{\text{H}}$  3.92 (2H, s,  $\text{CH}_2$ ). **12** (■) (partial assignment):  $\delta_{\text{H}}$  4.24 (2H, s,  $\text{CH}_2$ ). Dihydropyrimidone **9** (▼): HRMS (ESI)  $m/z$  for  $[\text{C}_8\text{H}_{12}\text{N}_3\text{O}_4]^+$ : calcd 214.0822, found 214.0822.

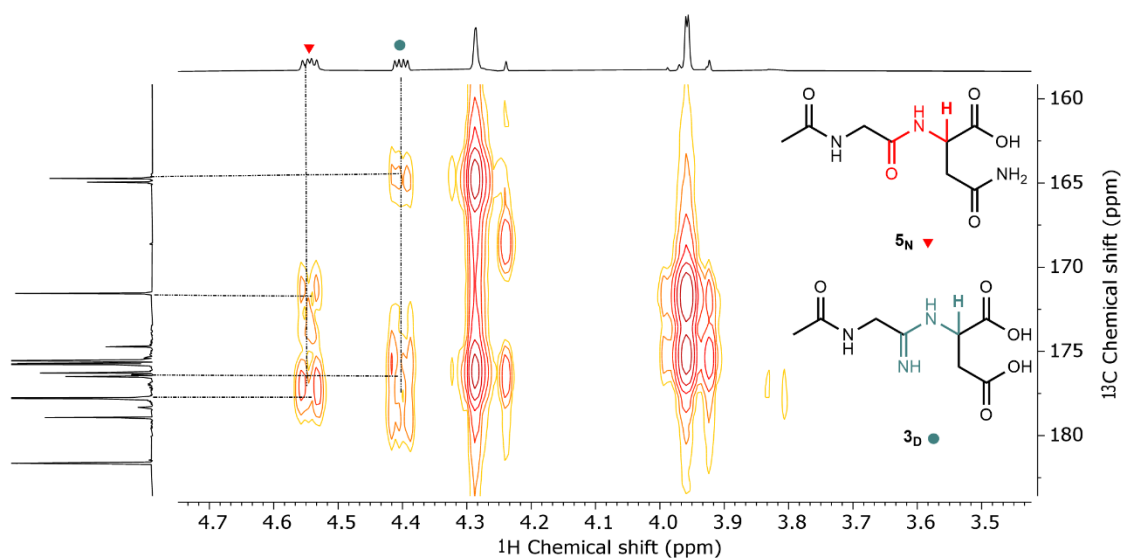

**Figure S23:**  $^1\text{H}$ - $^{13}\text{C}$  HMBC ( $^1\text{H}$ : 600 MHz [3.5-4.5 ppm],  $^{13}\text{C}$ : 176 MHz [150-185 ppm],  $\text{H}_2\text{O}/\text{D}_2\text{O}$  9:1) spectrum showing the diagnostic  $^2J_{\text{CH}}$  and  $^3J_{\text{CH}}$  coupling of the Asn- $\alpha$ H-COOH in **5<sub>N</sub>** at 4.54 ppm with two resonances at 177.9 and 171.5 ppm, which is characteristic of peptide bond formation of **2<sub>N</sub>** and the  $^2J_{\text{CH}}$  and  $^3J_{\text{CH}}$  coupling of Asp- $\alpha$ H-COOH in **3<sub>D</sub>** at 4.40 ppm with two resonances at 175.7 and 164.7 ppm, which is characteristic of peptide bond formation amidine of **2<sub>D</sub>**.

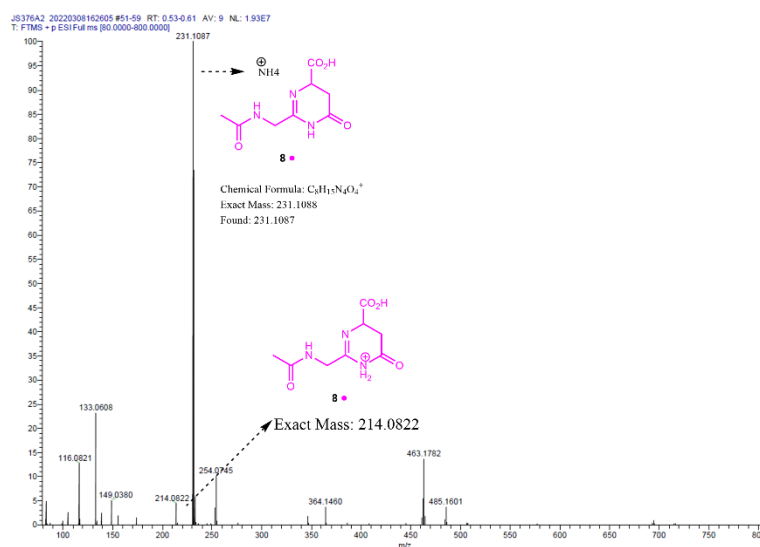

**Figure S24:** HRMS (ESI) spectra for dihydropyrimidone intermediate **9**.

Coupling of **1** with L-glutamic acid **2<sub>E</sub>** at pH 8.5 and room temperature

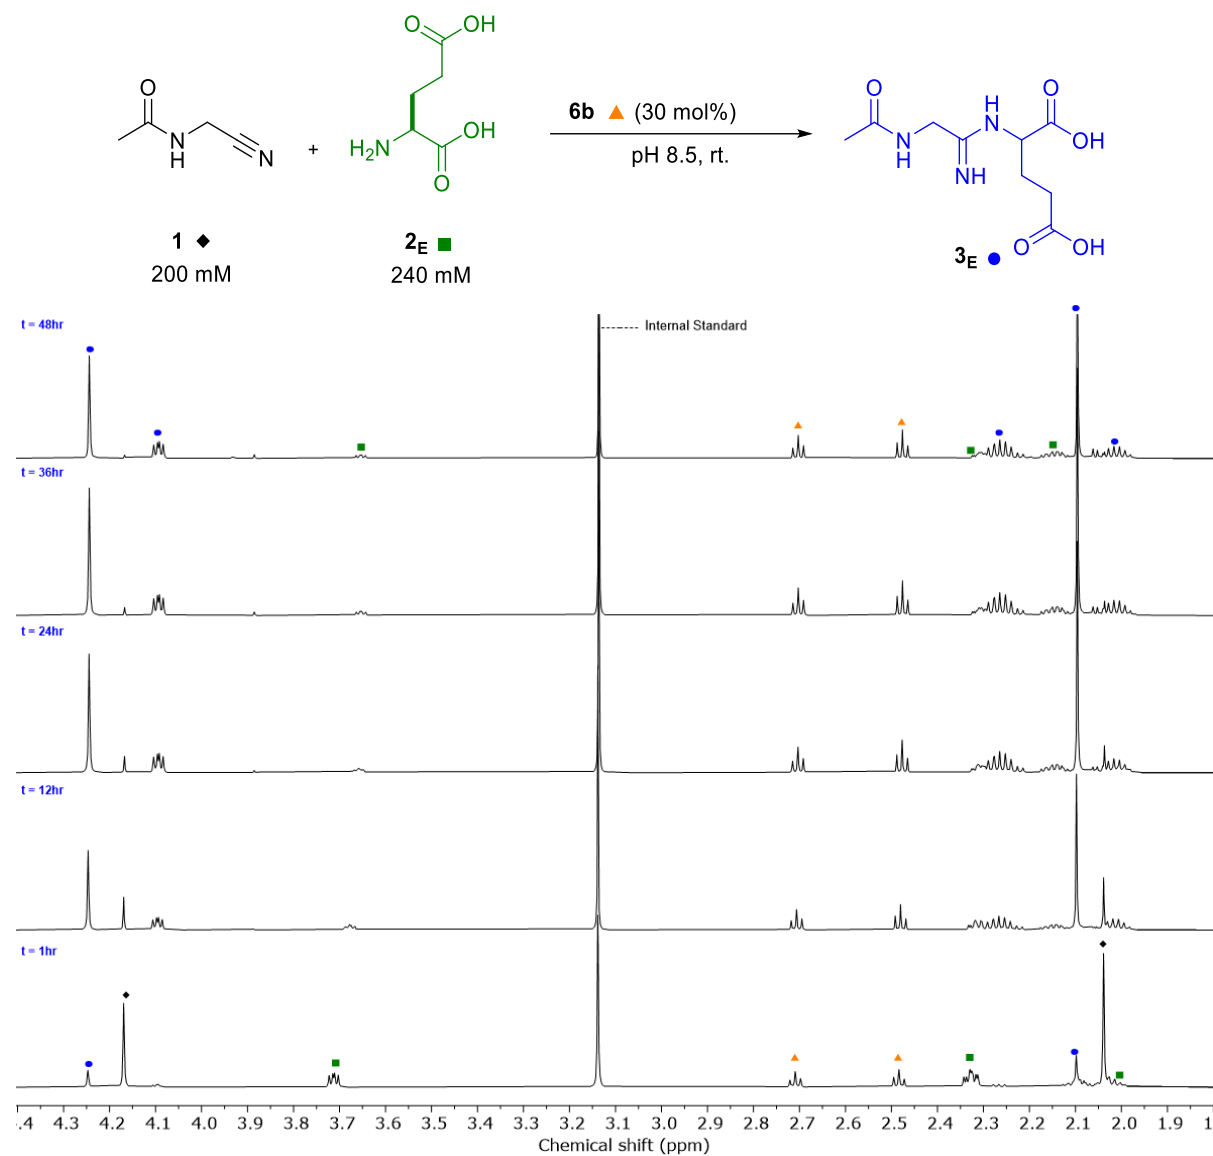

**Figure S25:** <sup>1</sup>H NMR (600 MHz, H<sub>2</sub>O/D<sub>2</sub>O 9:1, noesygppr1d, 1.8-4.4 ppm) spectrum to show the reaction of N-acetyl glycine nitrile (**1**, 200 mM) with L-glutamic acid (**2<sub>E</sub>**, 240 mM) and 3-mercaptopropanoic acid (**6b**, 60 mM) with MSM (100 mM) as an internal standard at pH 8.5 and room temperature.

<sup>1</sup>H NMR (600 MHz, H<sub>2</sub>O/D<sub>2</sub>O 9:1) (2-acetamido-1-iminoethyl)glutamic acid, **3<sub>E</sub>** (●): δ<sub>H</sub> 4.24 (2H, s, AcNHCH<sub>2</sub>), 4.09 (1H, dd, *J* = 7.5, 4.9 Hz, Glu-αH-COOH), 2.13-2.25 (3H, m, CH<sub>2</sub>CH<sub>2</sub>COOH), 2.10 (3H, s, H<sub>3</sub>C(CO)), 2.06-1.97 (1H, m, CH<sub>2</sub>CH<sub>2</sub>COOH); L-glutamic acid, **2<sub>E</sub>** (■): δ<sub>H</sub> 3.60 (1H, dd, *J* = 7.2, 5.2 Hz, αH-COOH), 2.31-2.22 (4H, m, CH<sub>2</sub>CH<sub>2</sub>COOH); N-acetylglucineamide, **7** (×) (partial assignment): δ<sub>H</sub> 3.93 (2H, d, *J* = 2.7 Hz, CH<sub>2</sub>).

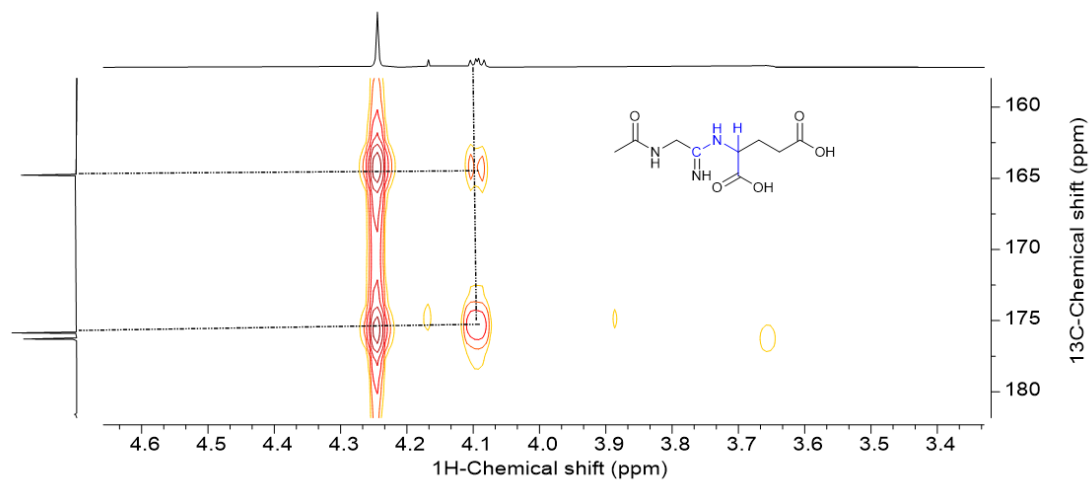

**Figure S26:**  $^1\text{H}$ - $^{13}\text{C}$  HMBC ( $^1\text{H}$ : 600 MHz [3.5-4.5 ppm],  $^{13}\text{C}$ : 176 MHz [150-185 ppm],  $\text{H}_2\text{O}/\text{D}_2\text{O}$  9:1) spectrum showing the diagnostic  $^2\text{J}_{\text{CH}}$  and  $^3\text{J}_{\text{CH}}$  coupling of the Glu- $\alpha$ -H-COOH in  $3_{\text{E}}$  at 4.09 ppm with two resonances at 175.8 and 164.9 ppm, which is characteristic of amidine bond formation of  $2_{\text{E}}$ .

Coupling of **1** with L-glutamine **2<sub>Q</sub>** at pH 8.5 and room temperature

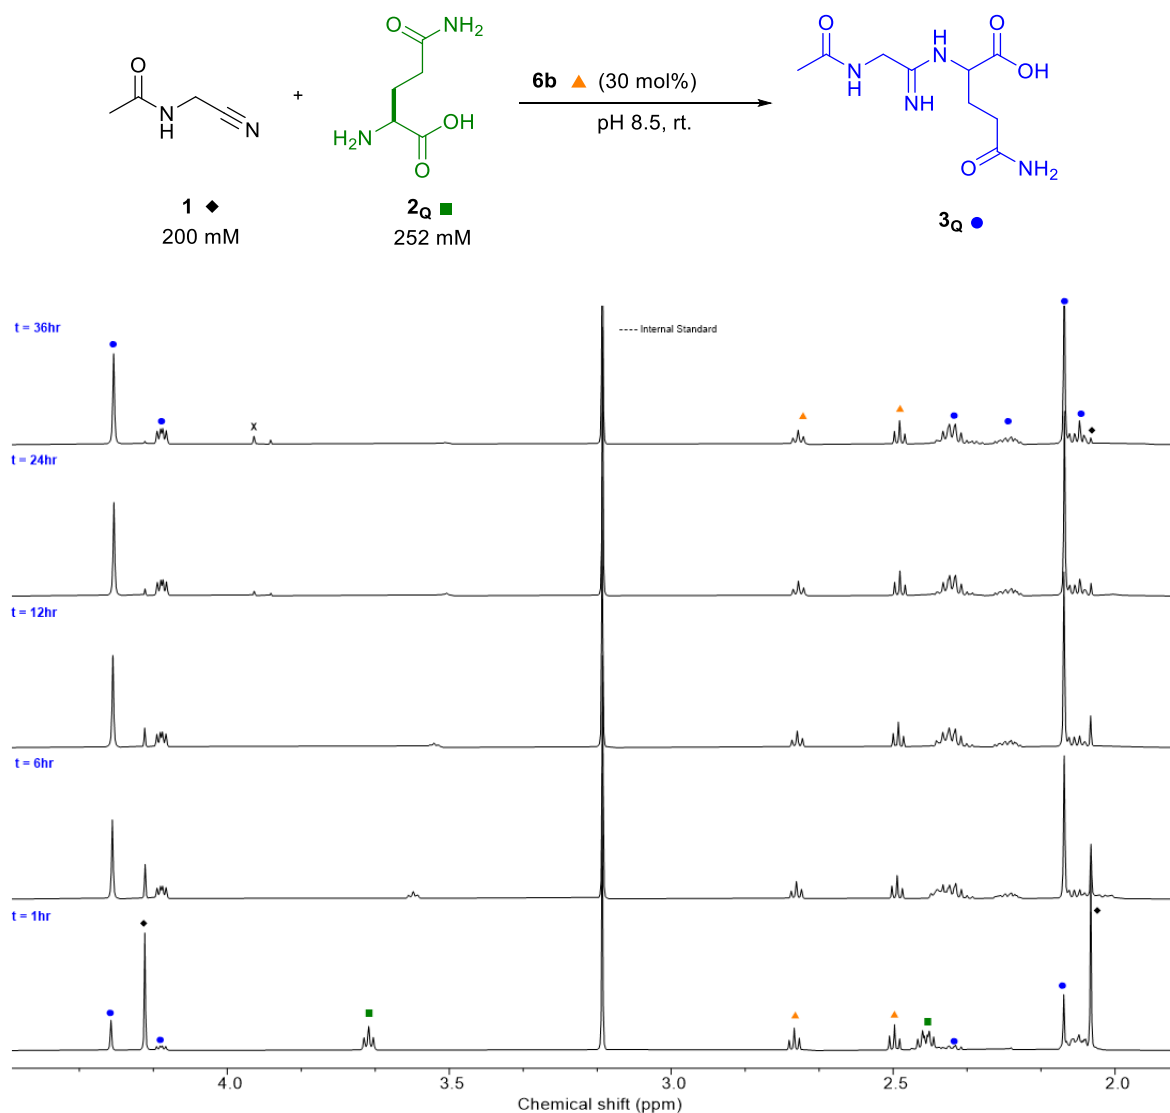

**Figure S27:** <sup>1</sup>H NMR (600 MHz, H<sub>2</sub>O/D<sub>2</sub>O 9:1, noesygppr1d, 1.8-4.5 ppm) spectrum to show the reaction of N-acetyl glycine nitrile (**1**, 200 mM) with L-glutamine (**2<sub>Q</sub>**, 250 mM) and 3-mercaptopropanoic acid (**6b**, 60 mM) with MSM (100 mM) as an internal standard at pH 8.5 and room temperature.

<sup>1</sup>H NMR (600 MHz, H<sub>2</sub>O/D<sub>2</sub>O 9:1, noesygppr1d) (2-acetamido-1-iminoethyl)glutamine, **3<sub>Q</sub>** (●): δ<sub>H</sub> 4.26 (2H, s, AcNHCH<sub>2</sub>), 4.15 (1H, dd, *J* = 7.7, 4.7 Hz, Gln-αH-COOH), 2.40 - 2.33 (2H, m, CH<sub>2</sub>CH<sub>2</sub>CONH<sub>2</sub>), 2.30 - 2.20 (1H, m, CHHCH<sub>2</sub>CONH<sub>2</sub>), 2.08 - 2.05 (1H, m, CHHCH<sub>2</sub>CONH<sub>2</sub>), 2.09 (3H, s, H<sub>3</sub>C(CO)); L-glutamine, **2<sub>Q</sub>** (■): δ<sub>H</sub> 3.44 (1H, t, *J* = 6.3 Hz, αH-COOH), 2.25-2.19 (2H, m, CH<sub>2</sub>CH<sub>2</sub>CONH<sub>2</sub>), 2.01-1.89 (2H, m, CH<sub>2</sub>CH<sub>2</sub>CONH<sub>2</sub>); N-acetylglycinamide, **7** (✕) (partial assignment): δ<sub>H</sub> 3.92 (2H, s, CH<sub>2</sub>).

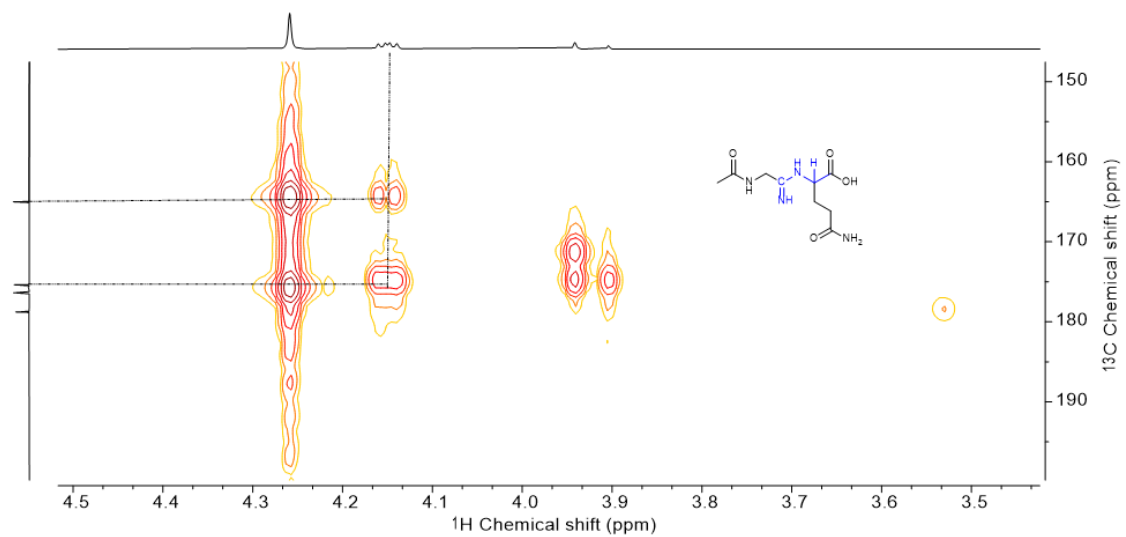

**Figure S28:**  $^1\text{H}$ - $^{13}\text{C}$  HMBC ( $^1\text{H}$ : 600 MHz [3.5-4.5 ppm],  $^{13}\text{C}$ : 176 MHz [150-200 ppm],  $\text{H}_2\text{O}/\text{D}_2\text{O}$  9:1) spectrum showing the diagnostic  $^2J_{\text{CH}}$  and  $^3J_{\text{CH}}$  coupling of the Gln- $\alpha$ H-COOH in **3Q** at 4.14 ppm with two resonances at 175.4 and 164.2 ppm, which is characteristic of amidine bond formation of **2Q**.

Coupling of **1** with glycine **2<sub>G</sub>** at pH 8.5 and room temperature

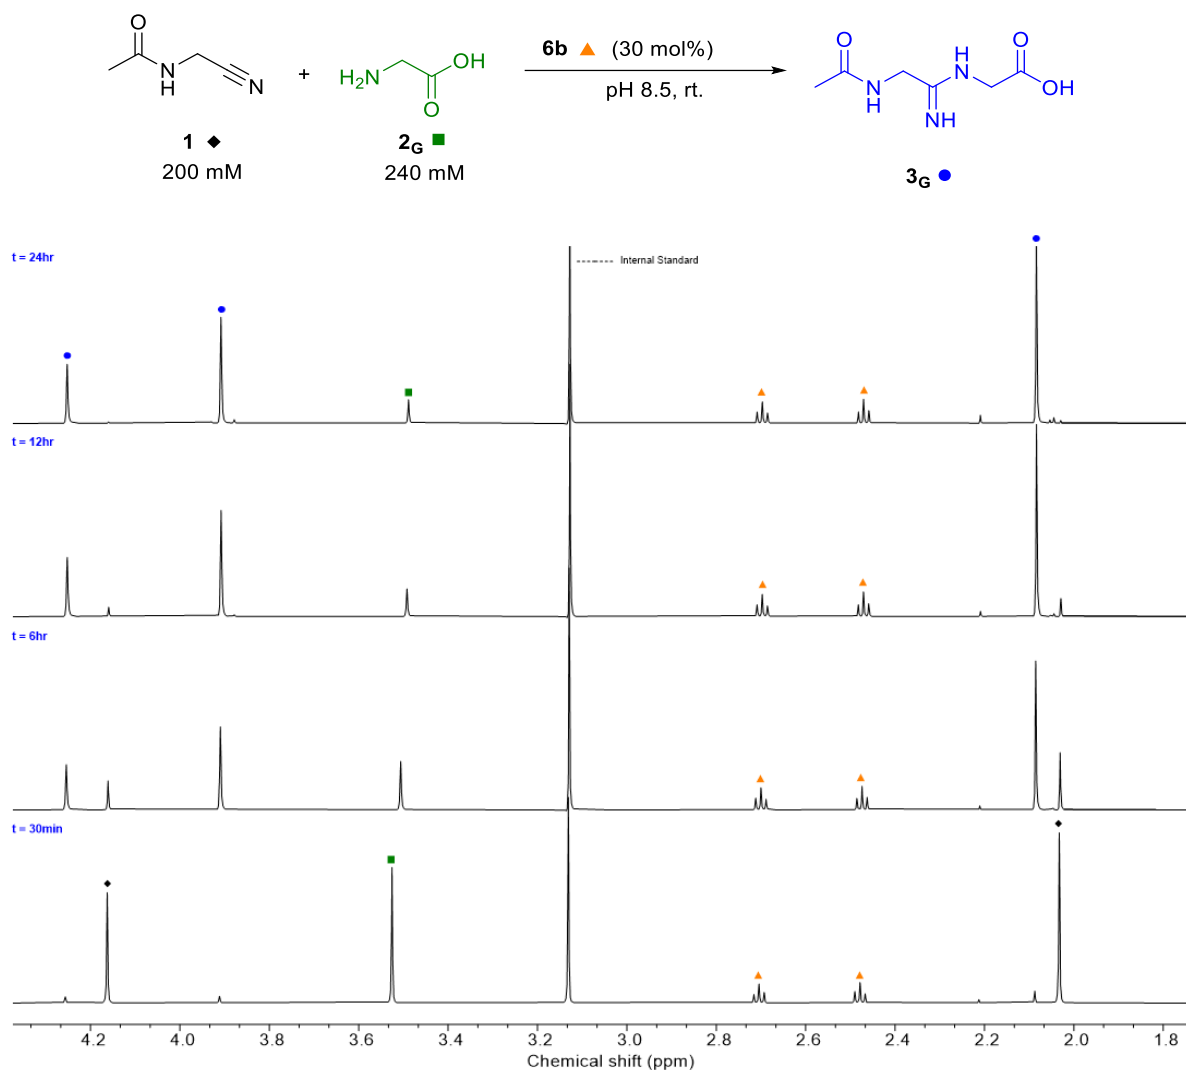

**Figure S29:** <sup>1</sup>H NMR (600 MHz, H<sub>2</sub>O/D<sub>2</sub>O 9:1, noesygppr1d, 1.7-4.3 ppm) spectrum to show the reaction of N-acetyl glycine nitrile (**1**, 200 mM) with glycine (**2<sub>G</sub>**, 240 mM) and 3-mercaptopropanoic acid (**6b**, 60 mM) with MSM (100 mM) as an internal standard at pH 8.5 and room temperature.

<sup>1</sup>H NMR (600 MHz, H<sub>2</sub>O/D<sub>2</sub>O) (2-acetamido-1-iminoethyl)glycine, **3<sub>G</sub>** (●): δ<sub>H</sub> 4.25 (2H, s, AcNHCH<sub>2</sub>), 3.91 (2H, s, CH<sub>2</sub>COOH), 2.08 (3H, s, H<sub>3</sub>C(CO)); glycine, **2<sub>G</sub>** (■): δ<sub>H</sub> 3.49 (2H, s, CH<sub>2</sub>).

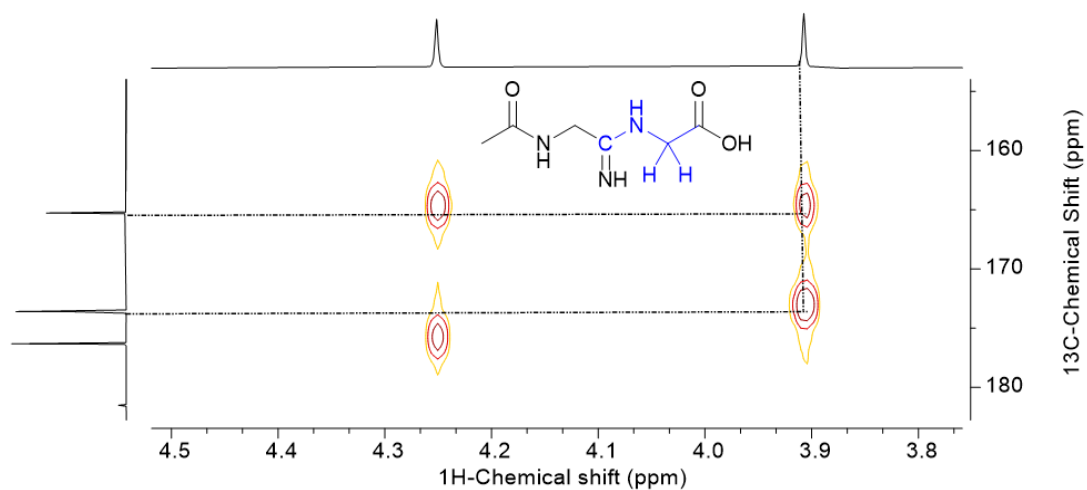

**Figure S30:**  $^1\text{H}$ - $^{13}\text{C}$  HMBC ( $^1\text{H}$ : 600 MHz [3.80–4.50 ppm],  $^{13}\text{C}$ : 176 MHz [150–185 ppm],  $\text{H}_2\text{O}/\text{D}_2\text{O}$  9:1) spectrum showing the diagnostic  $^2\text{J}_{\text{CH}}$  and  $^3\text{J}_{\text{CH}}$  coupling of Gly- $\alpha\text{H}$ -COOH in **3G** at 3.91 ppm with two resonances at 175.4 and 164.6 ppm, which is characteristic of amidine bond formation of **Gly**.



Coupling of **1** with L-histidine **2<sub>H</sub>** at pH 8.5 and room temperature

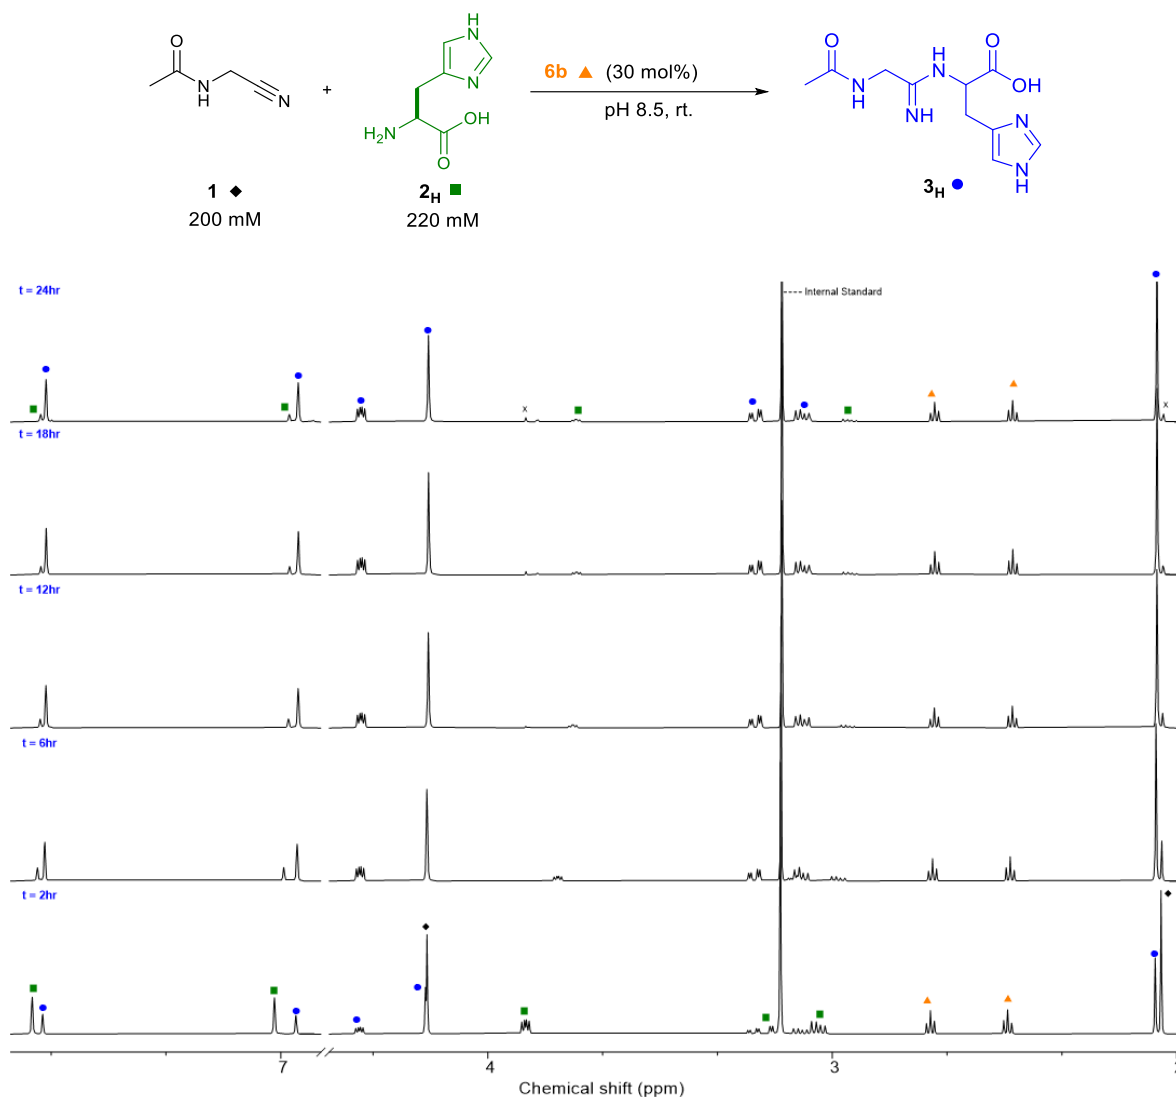

**Figure S31:** <sup>1</sup>H NMR (600 MHz, H<sub>2</sub>O/D<sub>2</sub>O 9:1, noesygppr1d, 2.0-5.0 ppm) spectrum to show the reaction of N-acetyl glycine nitrile (**1**, 200 mM) with L-histidine (**2<sub>H</sub>**, 220 mM) and 3-mercaptopropanoic acid (**6b**, 60 mM) with MSM (100 mM) as an internal standard at pH 8.5 and room temperature.

<sup>1</sup>H NMR (600 MHz, H<sub>2</sub>O/D<sub>2</sub>O 9:1, noesygppr1d) (2-acetamido-1-iminoethyl)histidine, **3<sub>H</sub>** (●): δ<sub>H</sub> 7.64 (1H, s, ArH), 6.91 (1H, s, ArH), 4.33 (1H, dd, *J* = 8.1, 4.5 Hz, His-αH-COOH), 4.17 (2H, s, AcNHCH<sub>2</sub>), 3.22 (1H, ABX, *J* = 15.1, 4.5 Hz, CH(CHHAr)), 3.09 (1H, ABX, *J* = 15.1, 8.1 Hz, CH(CHHAr)), 2.06 (3H, s, H<sub>3</sub>C(CO)); L-histidine, **2<sub>H</sub>** (■): δ<sub>H</sub> 7.70 (1H, s, ArH), 6.98 (1H, s, ArH), 3.74 (1H, ABX, *J* = 8.0, 4.9 Hz, αH-COOH), 2.91-2.87 (1H, m, CH(CHHAr)), 2.95 (1H, dd, *J* = 15.1, 8.0 Hz, CH(CHHAr)); N-acetyl glycine nitrile, **1** (×) (partial assignment): δ<sub>H</sub> 3.89 (2H, s, CH<sub>2</sub>).

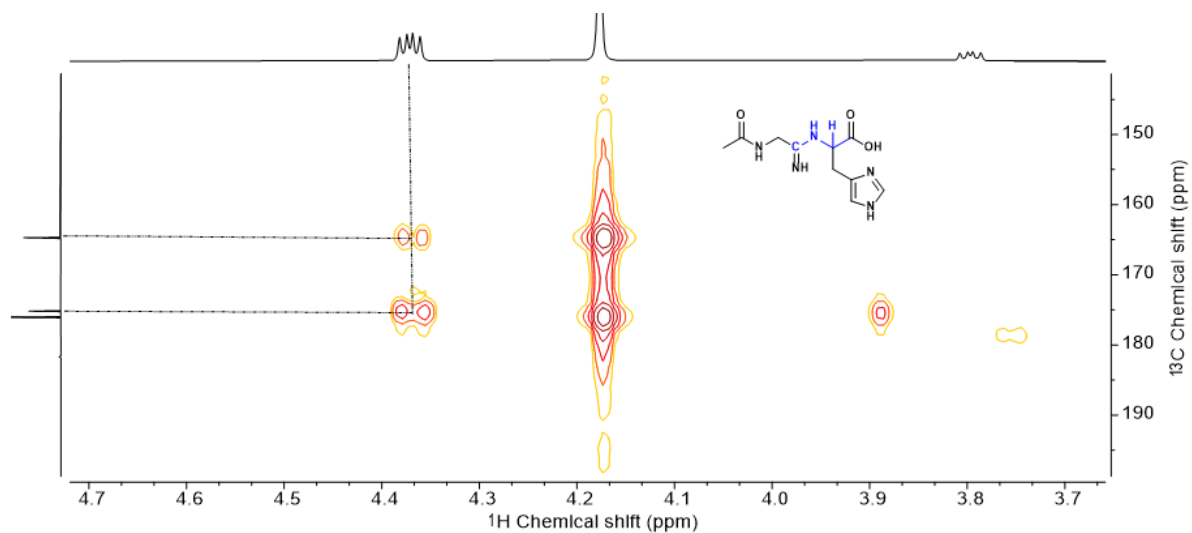

**Figure S32:**  $^1\text{H}$ - $^{13}\text{C}$  HMBC ( $^1\text{H}$ : 600 MHz [3.5–4.5 ppm],  $^{13}\text{C}$ : 176 MHz [110–185 ppm],  $\text{H}_2\text{O}/\text{D}_2\text{O}$  9:1) spectrum showing the diagnostic  $^2\text{J}_{\text{CH}}$  and  $^3\text{J}_{\text{CH}}$  coupling of the His- $\alpha\text{H}$ -COOH in **3<sub>H</sub>** at 4.33 ppm with two resonances at 175.2 and 164.7 ppm, which is characteristic of amidine bond formation of **2<sub>H</sub>**.

Coupling of **1** with *L*-isoleucine **2**<sub>1</sub> at pH 8.5 and room temperature

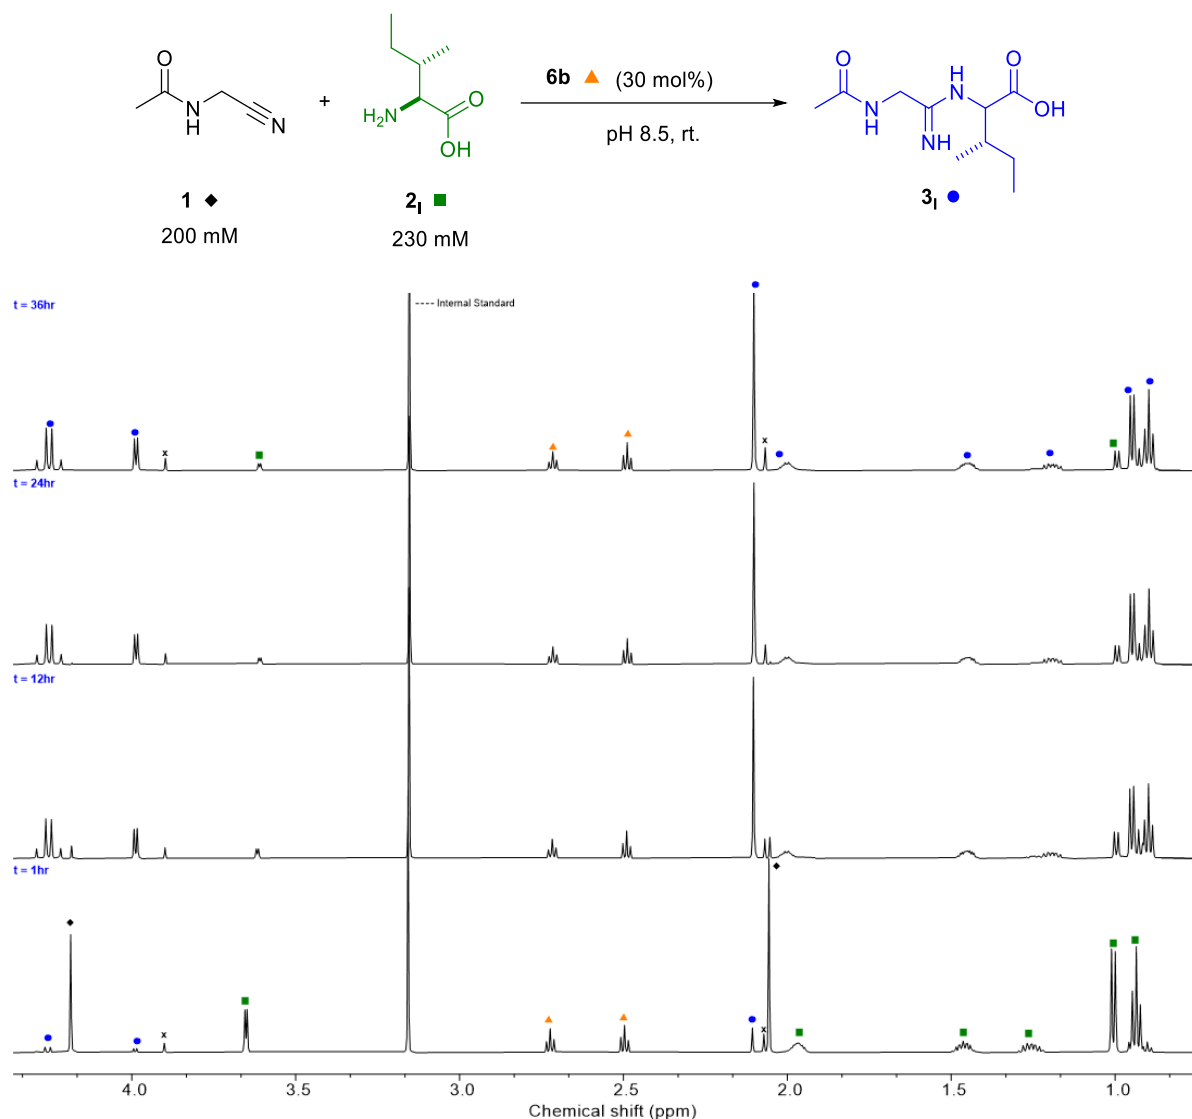

**Figure S33:** <sup>1</sup>H NMR (600 MHz, H<sub>2</sub>O/D<sub>2</sub>O 9:1, noesygppr1d, 0.5–4.2 ppm) spectrum to show the reaction of *N*-acetyl glycine nitrile (**1**, 200 mM) with *L*-isoleucine (**2**<sub>1</sub>, 230 mM) and 3-mercaptopropanoic acid (**6b**, 60 mM) with MSM (100 mM) as an internal standard at pH 8.5 and room temperature.

<sup>1</sup>H NMR (600 MHz, H<sub>2</sub>O/D<sub>2</sub>O 9:1, noesygppr1d) (*2*-acetamido-1-iminoethyl)isoleucine, **3**<sub>1</sub> (●) (partial assignment): δ<sub>H</sub> 4.28 (1H, AB, *J* = 17.1 Hz, AcNHCHH), 4.23 (1H, AB, *J* = 17.1 Hz, AcNHCHH), 3.99 (1H, d, *J* = 5.8 Hz, Ile-αH-COOH), 2.08 (3H, s, H<sub>3</sub>C(CO)), 2.04-1.97 (m, 1H, Ile-βCH(CH<sub>3</sub>)CH<sub>2</sub>CH<sub>3</sub>), 1.50-1.40 (m, 1H, Ile-CH(CH<sub>3</sub>)CHHCH<sub>3</sub>), 1.26-1.14 (m, 1H, Ile-CH(CH<sub>3</sub>)CHHCH<sub>3</sub>), 0.95 (3H, d, *J* = 6.9 Hz, Ile-βCH(CH<sub>3</sub>)CH<sub>2</sub>CH<sub>3</sub>), 0.90 (3H, t, *J* = 7.4 Hz, Ile-CH(CH<sub>3</sub>)CH<sub>2</sub>CH<sub>3</sub>); *L*-isoleucine, **2**<sub>1</sub> (■) (partial assignment): δ<sub>H</sub> 3.61 (1H, d, *J* = 4.1 Hz, αH-COOH); *N*-acetylglycinamide, **7** (✕) (partial assignment): δ<sub>H</sub> 3.90 (2H, s, CH<sub>2</sub>).

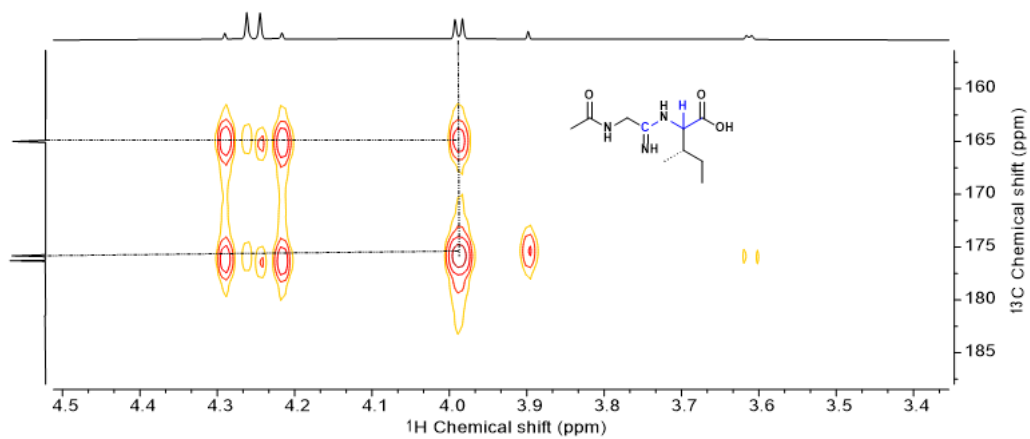

**Figure S34:**  $^1\text{H}$ - $^{13}\text{C}$  HMBC ( $^1\text{H}$ : 600 MHz [3.4–4.5 ppm],  $^{13}\text{C}$ : 176 MHz [150–185 ppm],  $\text{H}_2\text{O}/\text{D}_2\text{O}$  9:1) spectrum showing the diagnostic  $^2\text{J}_{\text{CH}}$  and  $^3\text{J}_{\text{CH}}$  coupling of the Ile- $\alpha$ H-COOH in **3i** at 4.25 ppm with two resonances at 175.7 and 164.7 ppm, which is characteristic of amidine bond formation of **2i**.

Coupling of **1** with *L*-leucine **2<sub>L</sub>** at pH 8.5 and room temperature

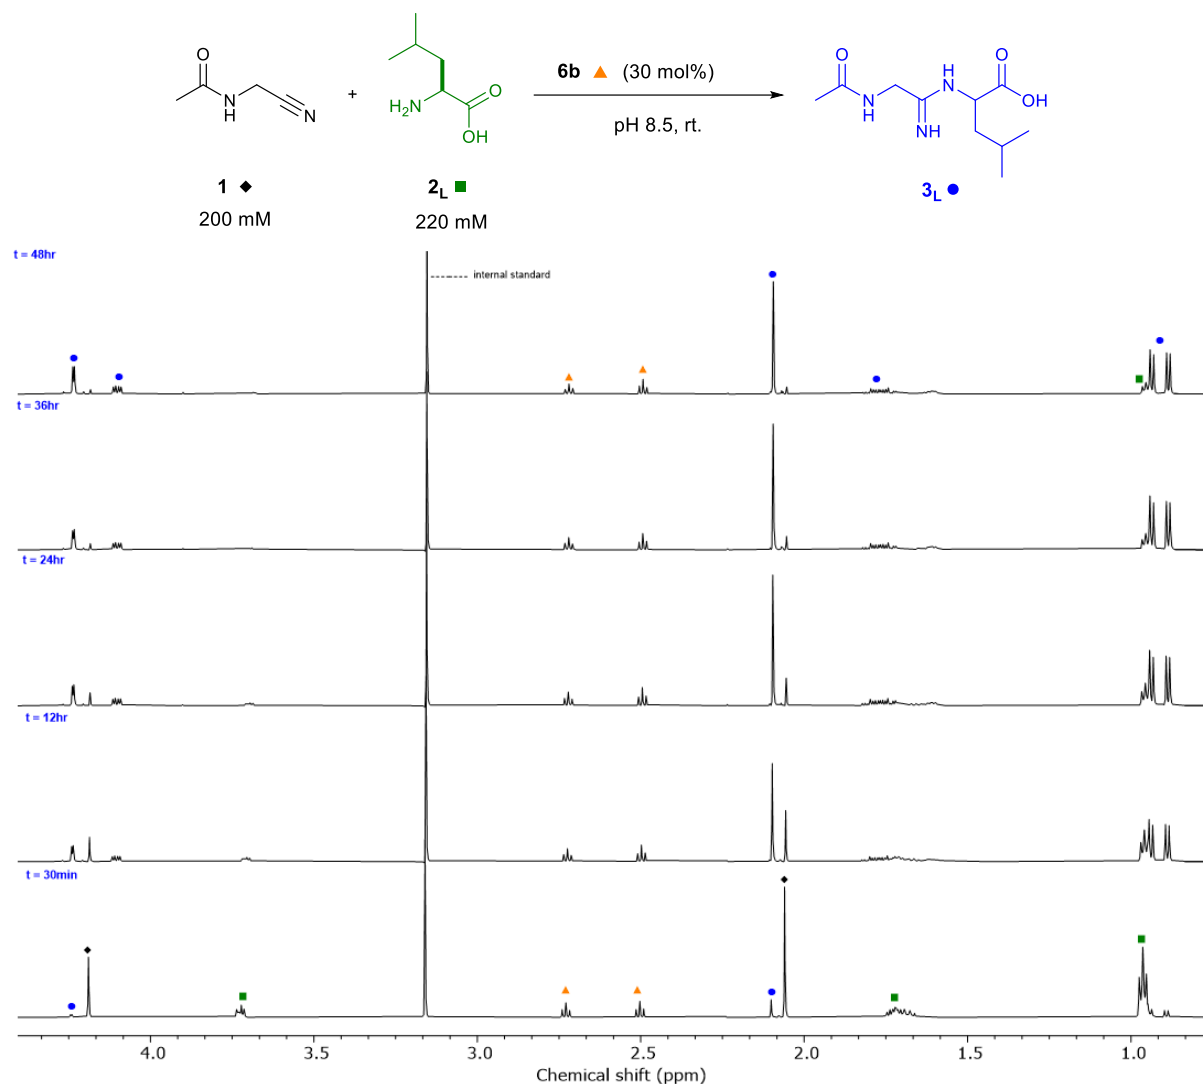

**Figure S35:**  $^1\text{H}$  NMR (600 MHz,  $\text{H}_2\text{O}/\text{D}_2\text{O}$  9:1, noesygppr1d, 0.5-5.0 ppm) spectrum to show the reaction of *N*-acetyl glycine nitrile (**1**, 200 mM) with *L*-leucine (**2<sub>L</sub>**, 220 mM) and 3-mercapto-propanoic acid (**6b**, 60 mM) with MSM (100 mM) as an internal standard at pH 8.5 and room temperature.  $\times = 7$ .

$^1\text{H}$  NMR (600 MHz,  $\text{H}_2\text{O}/\text{D}_2\text{O}$  9:1, noesygppr1d) (*2*-acetamido-1-iminoethyl)leucine, **3<sub>L</sub>** (●) (partial assignment):  $\delta_{\text{H}}$  4.24 (1H, AB,  $J = 17.1$  Hz, AcNHCHH), 4.20 (1H, AB,  $J = 17.1$  Hz, AcNHCHH), 4.10 (1H, dd,  $J = 9.8, 4.3$  Hz, Leu- $\alpha$ H-COOH), 2.07 (3H, s,  $\text{H}_3\text{C}(\text{CO})$ ), 1.69-1.84 (2H, m; Leu- $\text{CH}_2$ ), 1.58-1.68 (1H, m; Leu- $\text{CH}-(\text{CH}_3)_2$ ), 0.94 (3H, d,  $J = 6.7$  Hz, Leu- $(\text{CH}_3)$ ), 0.89 (3H, d,  $J = 6.5$  Hz, Leu- $(\text{CH}_3)$ ) *L*-leucine, **2<sub>L</sub>** (■) (partial assignment):  $\delta_{\text{H}}$  3.62 (1H, dd,  $J = 8.8, 4.9$  Hz,  $\alpha\text{H-COOH}$ ); *N*-Acetylglycinamide, **7** (×) (partial assignment):  $\delta_{\text{H}}$  3.89 (2H, s,  $\text{CH}_2$ ).

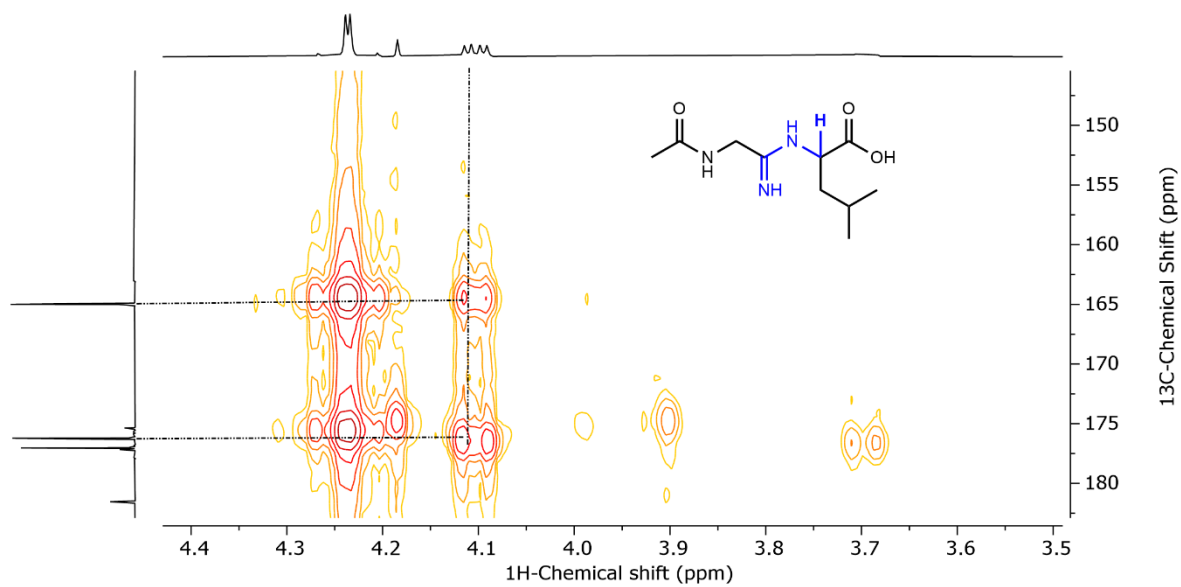

**Figure S36:**  $^1\text{H}$ - $^{13}\text{C}$  HMBC ( $^1\text{H}$ : 600 MHz [3.5-4.5 ppm],  $^{13}\text{C}$ : 176 MHz [150-185 ppm],  $\text{H}_2\text{O}/\text{D}_2\text{O}$  9:1) spectrum showing the diagnostic  $^2\text{J}_{\text{CH}}$  and  $^3\text{J}_{\text{CH}}$  coupling of the Leu- $\alpha\text{H}$ -COOH in **3L** at 4.08 ppm with two resonances at 175.6 and 164.6 ppm, which is characteristic of amidine bond formation of **2L**.

Coupling of **1** with L-lysine **2<sub>K</sub>** at pH 8.5 and room temperature

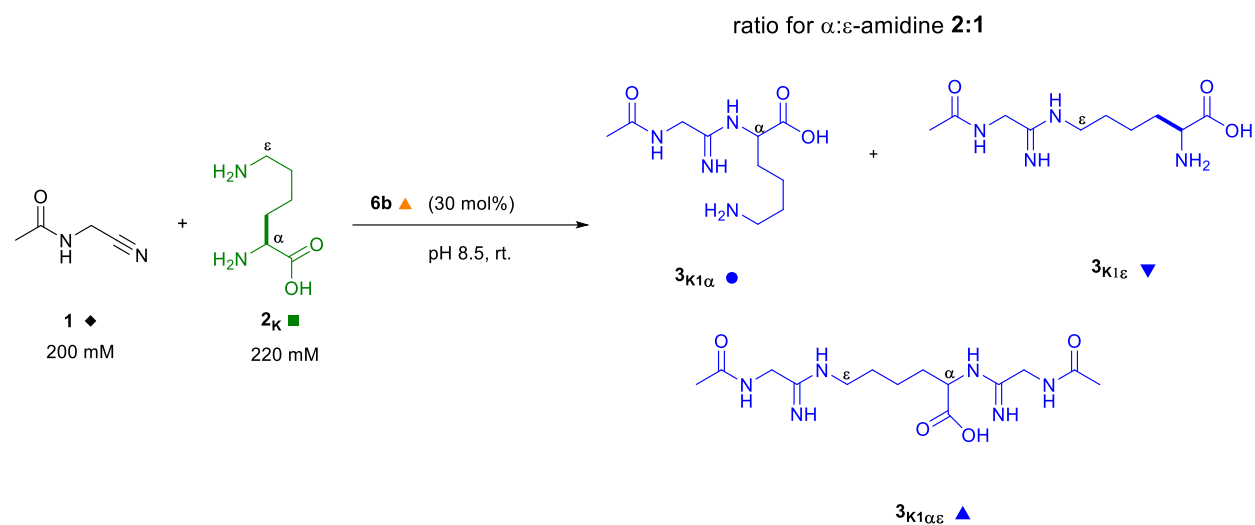

Combined yields:  $\text{3}_{\text{K1}\alpha} + \text{3}_{\text{K1}\alpha\epsilon} = 69\%$  (total  $\alpha$ -amidine and bis-NH)  $\blacktriangle$

$\text{3}_{\text{K1}\epsilon} + \text{3}_{\text{K1}\alpha\epsilon} = 36\%$  (Total  $\epsilon$ -amidine and bis-NH)  $\blacktriangledown$

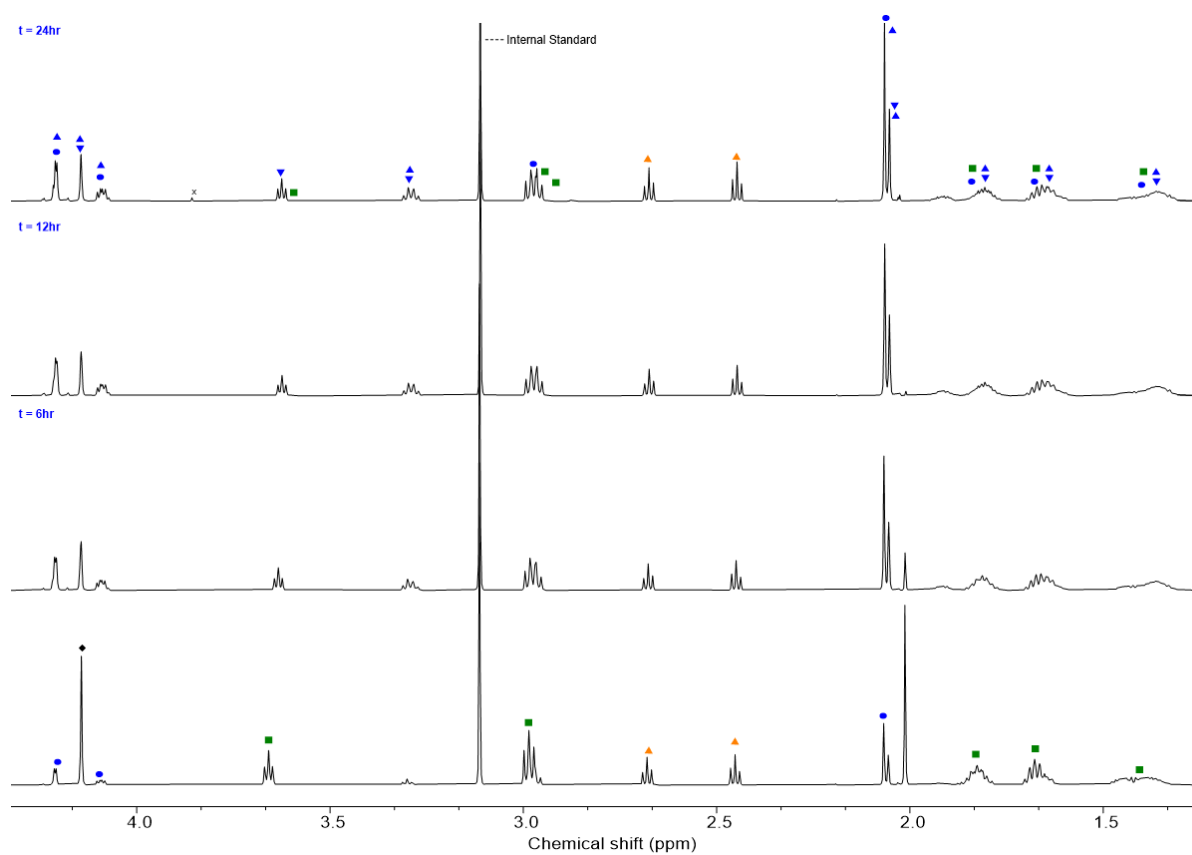

**Figure S37:**  $^1\text{H}$  NMR (600 MHz,  $\text{H}_2\text{O}/\text{D}_2\text{O}$  9:1, noesygppr1d, 0.5-5.0 ppm) spectrum to show the reaction of N-acetyl glycine nitrile (**1**, 200 mM) with L-lysine (**2<sub>K</sub>**, 250 mM) and 3-mercaptopropanoic acid (**6b**, 60 mM) with MSM (100 mM) as an internal standard at pH 8.5 and room temperature.

$^1\text{H}$  NMR (600 MHz,  $\text{H}_2\text{O}/\text{D}_2\text{O}$  9:1, noesygprr1d):

$N^2$ -(2-acetamido-1-iminoethyl)lysine,  $\mathfrak{3}_{K1\alpha}$  (●) (partial assignment):  $\delta_{\text{H}}$  4.21 – 4.17 (2H, m, dd, overlapped,  $N^2$ -AcNHCHH), 4.09 (1H, dd,  $J = 7.5, 4.7$  Hz, Lys- $\alpha$ H-COOH), 2.93 – 3.01 (2H, m,  $N^6$ - $\text{NH}_2\text{CH}_2\text{CH}_2$ ), 2.07 (3H, s,  $N^2$ - $\text{H}_3\text{C}(\text{CO})$ ).

$N^2, N^6$ -di(2-acetamido-1-iminoethyl)lysine,  $\mathfrak{3}_{K1\alpha\epsilon}$  (▲) (partial assignment):  $\delta_{\text{H}}$  4.25 – 4.14 (2H, m,  $N^2$ -AcNHCHH), 4.11–4.07 (1H, m, overlapped, Lys- $\alpha$ H-COOH), 3.37 – 3.23 (2H, m,  $N^6$ - $\text{CH}_2\text{CH}_2$ ), 2.07 (3H, s,  $N^2$ - $\text{H}_3\text{C}(\text{CO})$ ), 2.03 (3H, s,  $N^6$ - $\text{H}_3\text{C}(\text{CO})$ ).

$N^6$ -(2-acetamido-1-iminoethyl)lysine,  $\mathfrak{3}_{K1\epsilon}$  (▼) (partial assignment):  $\delta_{\text{H}}$  4.14 (2H, s,  $N^6$ -AcNHCH $_2$ ), 3.63 (1H, t,  $J = 6.1$  Hz, Lys- $\alpha$ H-COOH), 3.37–3.23 (2H, m,  $N^6$ - $\text{CH}_2\text{CH}_2$ ), 2.03 (3H, s,  $N^6$ - $\text{H}_3\text{C}(\text{CO})$ ); *L*-lysine, **Lys** (■) (partial assignment):  $\delta_{\text{H}}$  3.63 (1H, t,  $J = 6.1$  Hz, Lys- $\alpha$ H-COOH), 2.95 – 3.01 (2H, t,  $J = 7.9$  Hz,  $N^6$ - $\text{NH}_2\text{CH}_2\text{CH}_2$ ); *N*-Acetylglycinamide, **7** (✱) (partial assignment):  $\delta_{\text{H}}$  3.86 (2H, s,  $\text{CH}_2$ ).

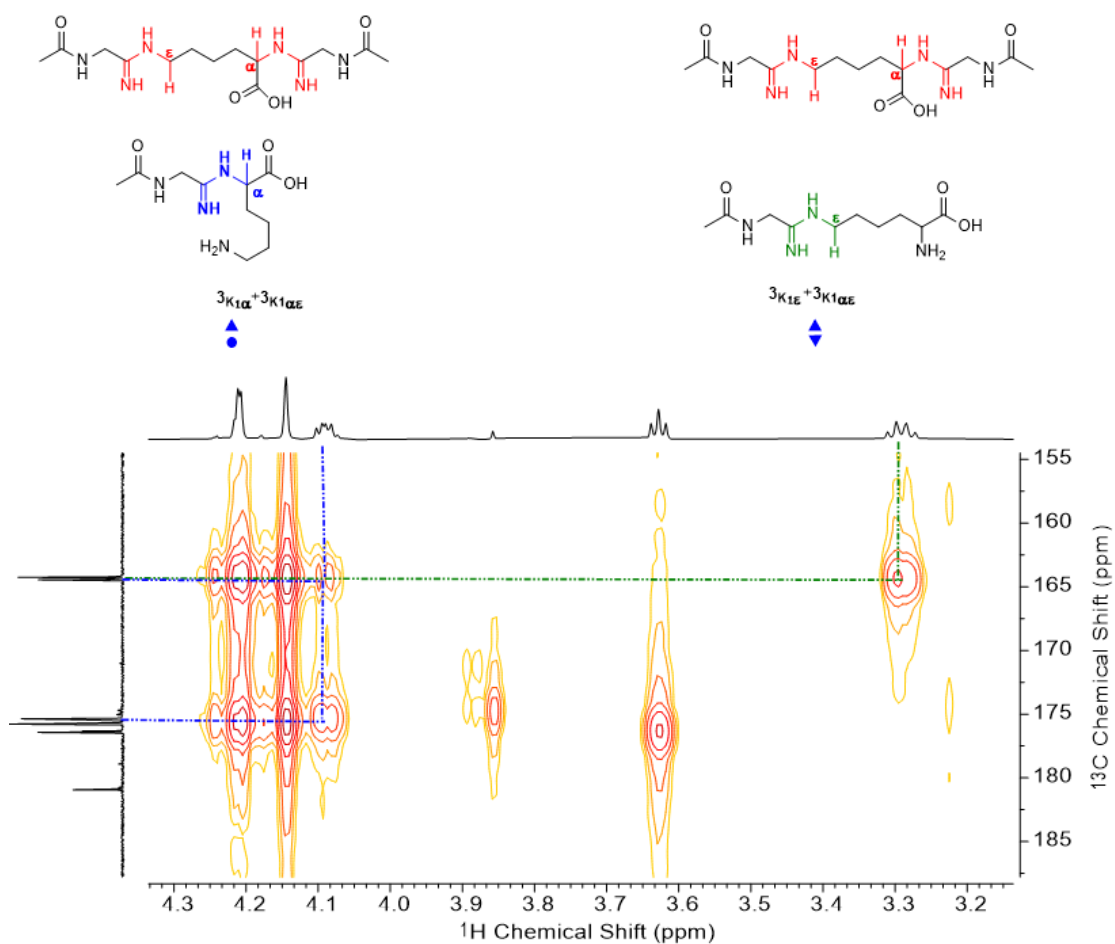

**Figure S38:**  $^1\text{H}$ - $^{13}\text{C}$  HMBC ( $^1\text{H}$ : 600 MHz [2.0–4.5 ppm],  $^{13}\text{C}$ : 176 MHz [150–185 ppm],  $\text{H}_2\text{O}/\text{D}_2\text{O}$  9:1) spectrum showing the diagnostic  $^2J_{\text{CH}}$  and  $^3J_{\text{CH}}$  coupling of the lysyl- $\alpha$ H-COOH and lysyl- $N^6$ - $\text{CH}_2$  in  $\mathfrak{3}_{K1\alpha\epsilon}$  (●),  $\mathfrak{3}_{K1\alpha\epsilon}$  (▲),  $\mathfrak{3}_{K2}$  (▼) which are characteristic of amidine bond formations of **2k**.



Coupling of **1** with DL-methionine **2<sub>M</sub>** at pH 8.5 and room temperature

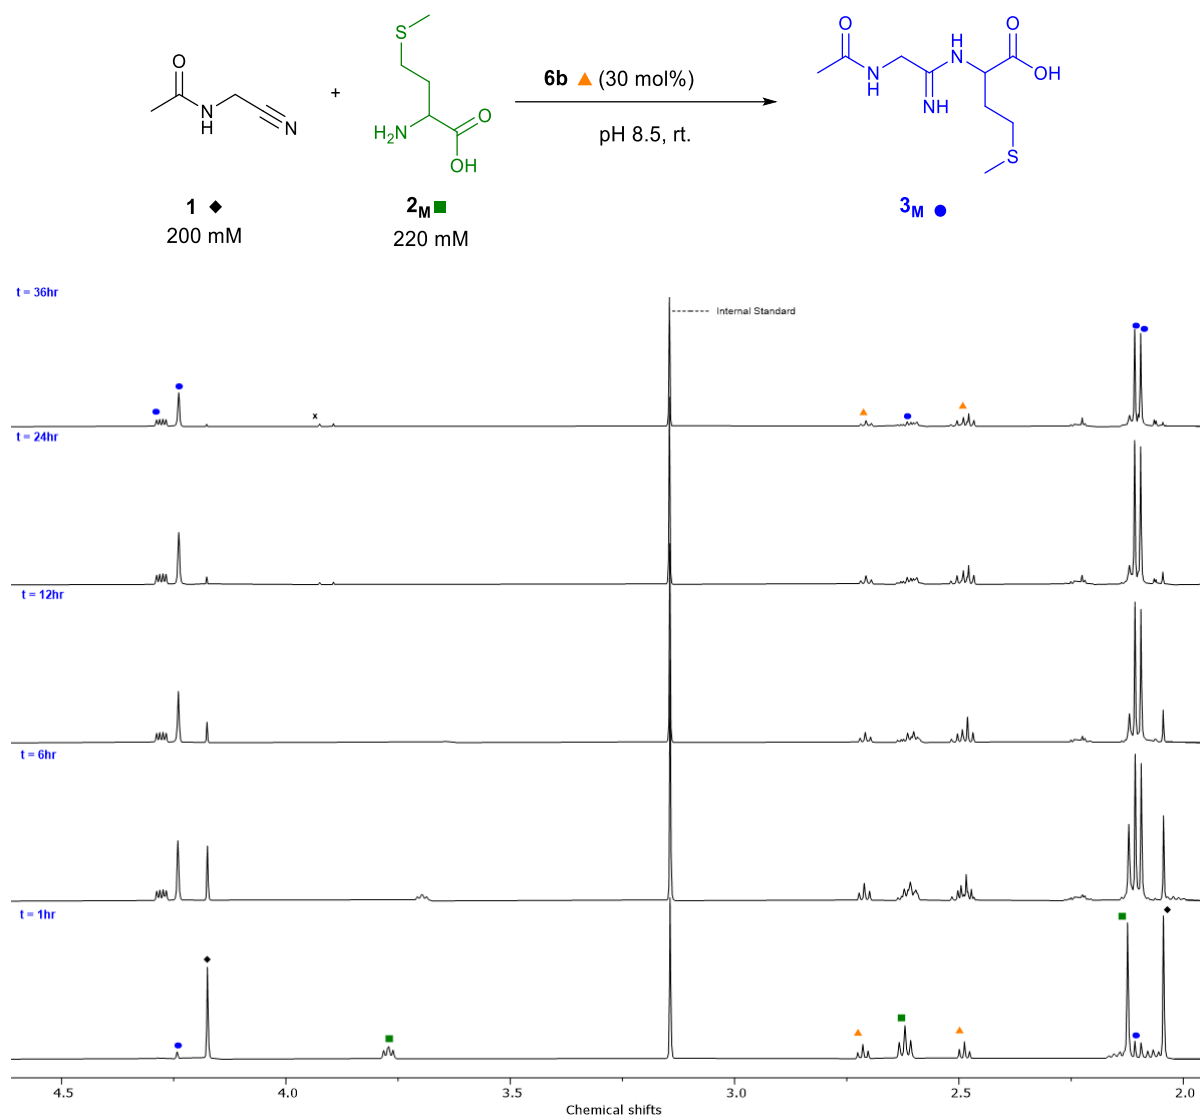

**Figure S39:** <sup>1</sup>H NMR (600 MHz, H<sub>2</sub>O/D<sub>2</sub>O 9:1, noesygppr1d, 1.9-4.6 ppm) spectrum to show the reaction of N-acetyl glycine nitrile (**1**, 200 mM) with DL-methionine (**2<sub>M</sub>**, 220 mM) and 3-mercaptopropanoic acid (**6b**, 60 mM) with MSM (100 mM) as an internal standard pH 8.5 and room temperature.

<sup>1</sup>H NMR (600 MHz, H<sub>2</sub>O/D<sub>2</sub>O 9:1, noesygppr1d) (*2-acetamido-1-iminoethyl*)methionine, **3<sub>M</sub>** (●) (partial assignment): δ<sub>H</sub> 4.28 (1H, dd, *J* = 8.5, 4.1 Hz, Met-αH-COOH), 4.24 (2H, s, AcNHCH<sub>2</sub>), 2.63-2.58 (2H, m, CH<sub>2</sub>SCH<sub>3</sub>), 2.10 (3H, s, CH<sub>2</sub>SCH<sub>3</sub>), 2.09 (3H, s, H<sub>3</sub>C(CO)); DL-methionine, **2<sub>M</sub>** (■) (partial assignment): δ<sub>H</sub> 3.56 (1H, br. t., *J* = 5.9 Hz, αH-COOH), 2.49 (2H, m, CH<sub>2</sub>SCH<sub>3</sub>), 2.11 (3H, s, SCH<sub>3</sub>); *N*-Acetylglycinamide, **7** (✕) (partial assignment): δ<sub>H</sub> 3.89 (2H, s, CH<sub>2</sub>).

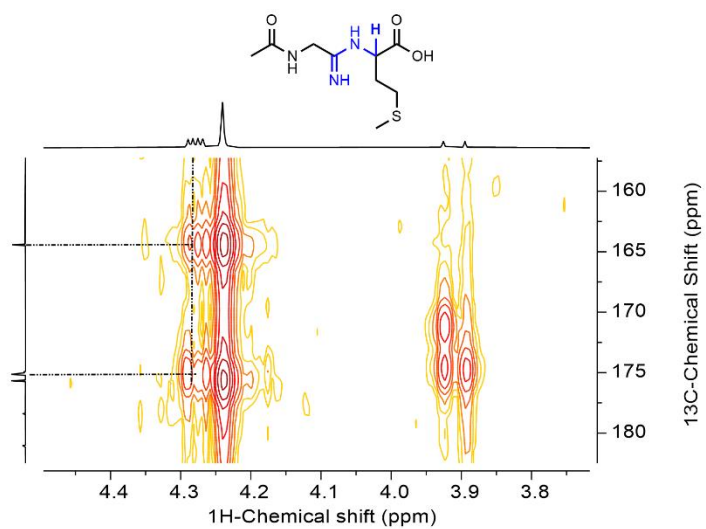

**Figure S40:**  $^1\text{H}$ - $^{13}\text{C}$  HMBC ( $^1\text{H}$ : 600 MHz [3.5-4.5 ppm],  $^{13}\text{C}$ : 176 MHz [150-185 ppm],  $\text{H}_2\text{O}/\text{D}_2\text{O}$  9:1) spectrum showing the diagnostic  $^2\text{J}_{\text{CH}}$  and  $^3\text{J}_{\text{CH}}$  coupling of the **Met**- $\alpha\text{H}$ -COOH in **3M** at 4.28 ppm with two resonances at 176.7 and 165.5 ppm, which is characteristic of amidine bond formation of **2M**.

Coupling of **1** with L-phenylalanine **2<sub>F</sub>** at pH 8.5 and room temperature

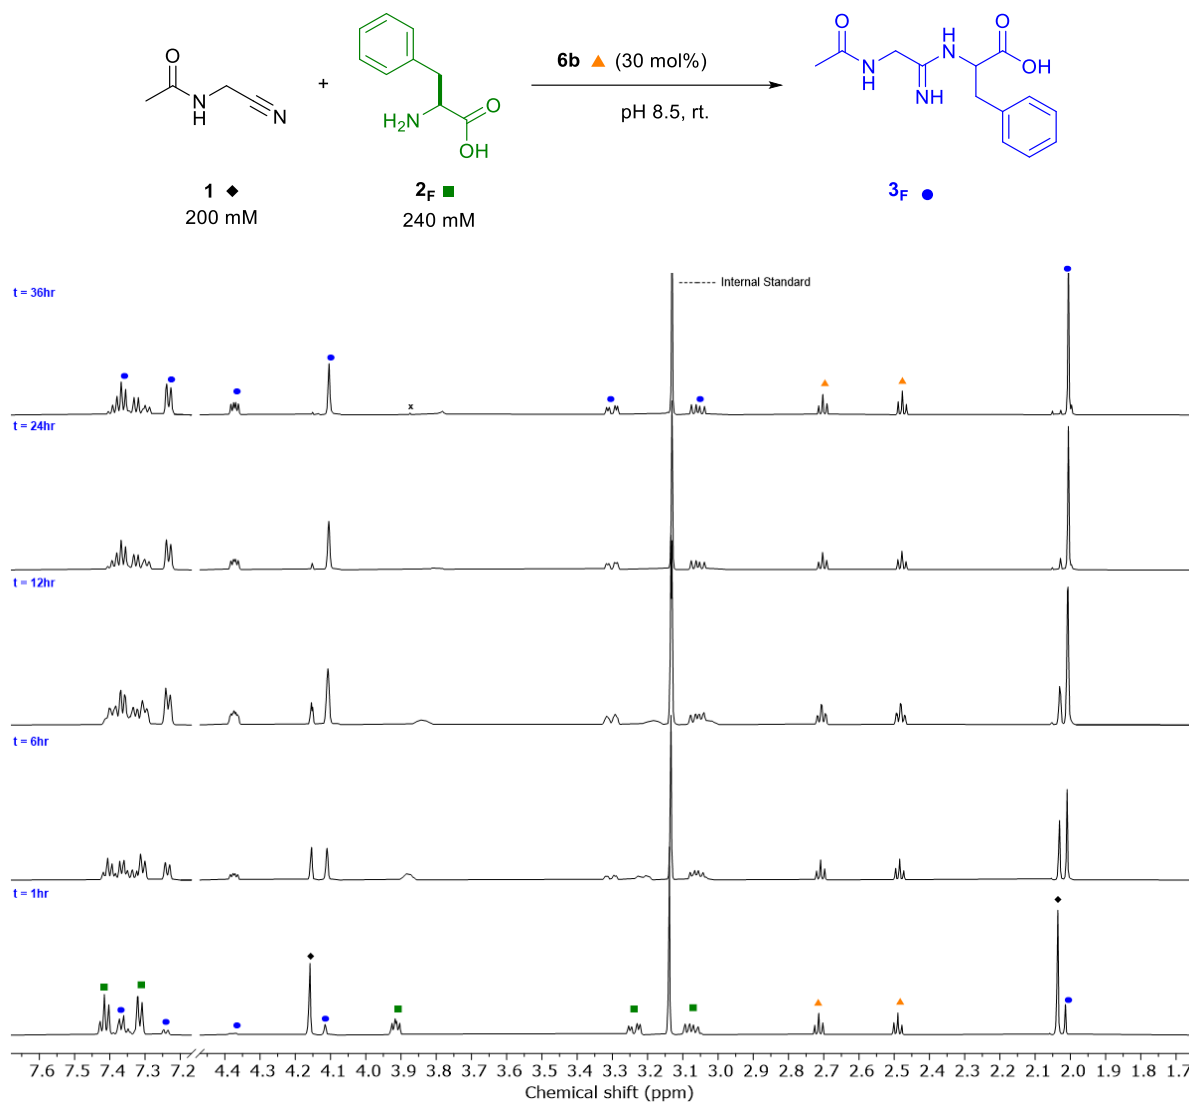

**Figure S41:** <sup>1</sup>H NMR (600 MHz, H<sub>2</sub>O/D<sub>2</sub>O 9:1, noesygppr1d, 1.6-7.7 ppm) spectrum to show the reaction of N-acetyl glycine nitrile (**1**, 200 mM) with L-phenylalanine (**2<sub>F</sub>**, 240 mM) and 3-mercaptopropanoic acid (**6b**, 60 mM) with MSM (100 mM) at pH 8.5 and room temperature.

<sup>1</sup>H NMR (600 MHz, H<sub>2</sub>O/D<sub>2</sub>O 9:1, noesygppr1d) (2-acetamido-1-iminoethyl)phenylalanine, **3<sub>F</sub>** (●) (partial assignment):  $\delta_{\text{H}}$  7.41-7.34 (2H, m, ArH), 7.33-7.27 (1H, m, ArH), 7.22 (2H, d,  $J = 8.5$  Hz, ArH), 4.37 (1H, ABX, ddd,  $J = 8.1, 4.4, 1.4$  Hz, Phe- $\alpha$ H-COOH), 4.10 (1H, AB,  $J = 17.3$  Hz, AcNHCHH), 4.08 (1H, AB,  $J = 17.3$  Hz, AcNHCHH), 3.30 (1H, ABX,  $J = 14.2, 4.4$  Hz, CHCHHPh), 3.06 (1H, ABX,  $J = 14.2, 8.1$  Hz, CHCHHPh), 2.00 (3H, s, H<sub>3</sub>C(CO)); **2<sub>F</sub>** (■) (partial assignment):  $\delta_{\text{H}}$  7.38-7.34 (3H, m, ArH), 7.28 (2H, d,  $J = 7.2$  Hz, ArH), 3.68 (1H, br. t,  $J = 6.2$  Hz,  $\alpha$ H-COOH); N-acetylglucynamide, **7** (✱) (partial assignment):  $\delta_{\text{H}}$  3.87 (2H, s, CH<sub>2</sub>).

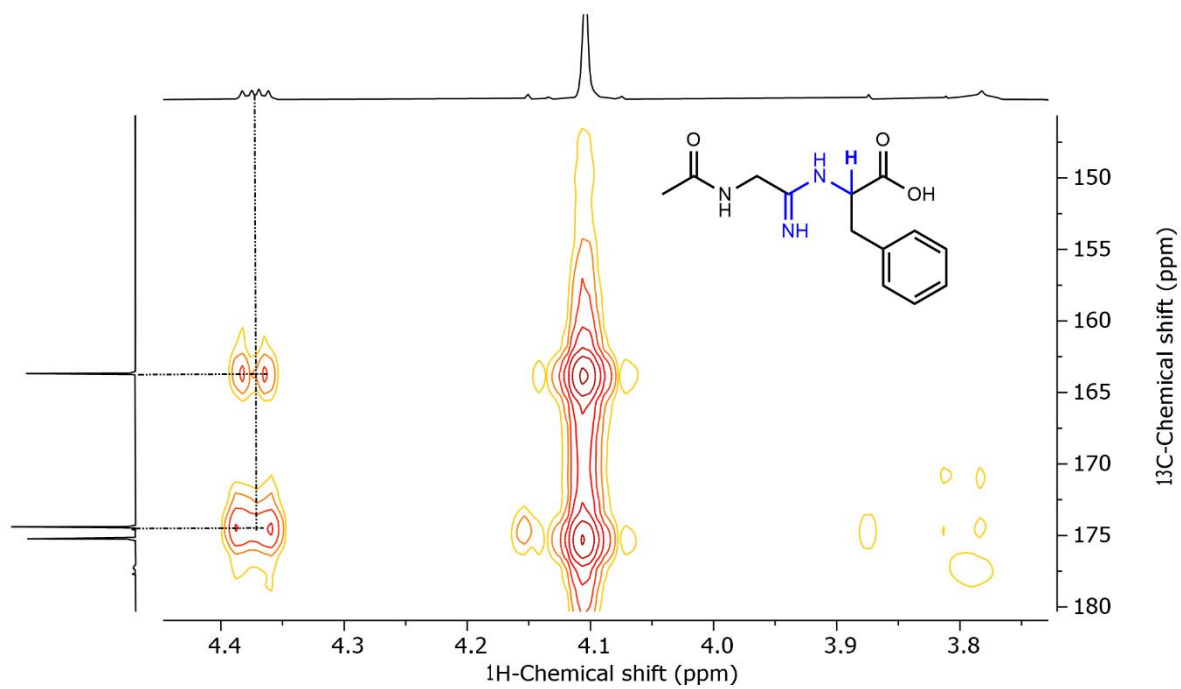

**Figure S42:**  $^1\text{H}$ - $^{13}\text{C}$  HMBC ( $^1\text{H}$ : 600 MHz [3.5-4.5 ppm],  $^{13}\text{C}$ : 176 MHz [150-185 ppm],  $\text{H}_2\text{O}/\text{D}_2\text{O}$  9:1) spectrum showing the diagnostic  $^2\text{J}_{\text{CH}}$  and  $^3\text{J}_{\text{CH}}$  coupling of the **Phe- $\alpha$ H-COOH** in **3F** at 4.37 ppm with two resonances at 175.5 and 164.6 ppm, which is characteristic of amidine bond formation of **2F**.

Coupling of **1** with *L*-proline **2P** at pH 8.5 and room temperature

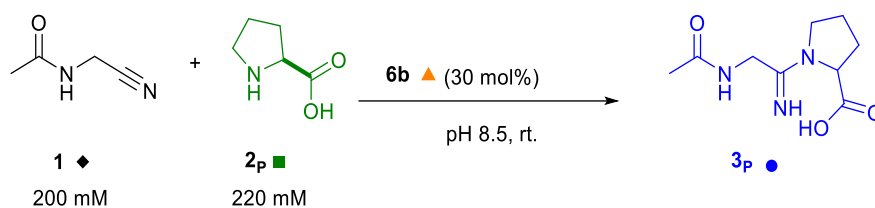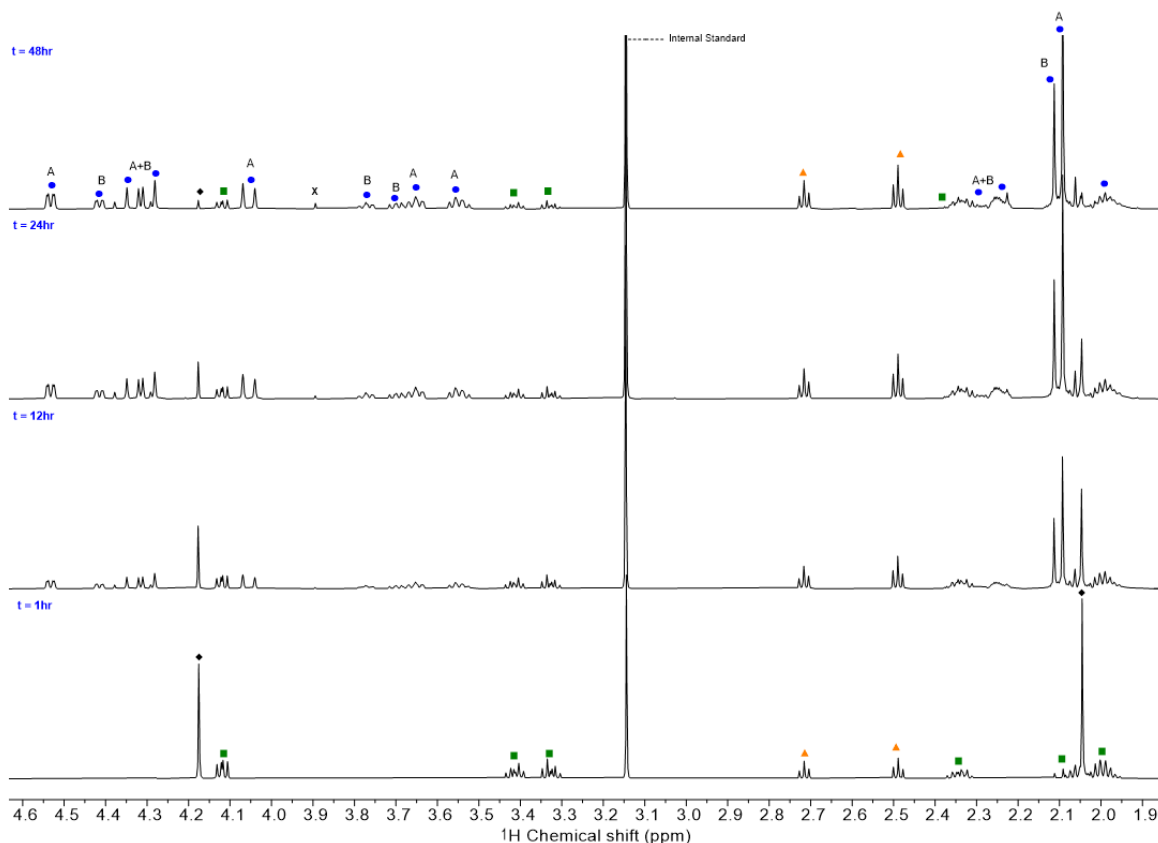

**Figure S43:** <sup>1</sup>H NMR (600 MHz, H<sub>2</sub>O/D<sub>2</sub>O 9:1, noesygppr1d, 1.8-4.6 ppm) spectrum to show the reaction of N-acetyl glycine nitrile (**1**, 200 mM) with *L*-proline (**2P**, 230 mM) and 3-mercaptopropanoic acid (**6b**, 60 mM) with MSM (100 mM) as an internal standard at pH 8.5 and room temperature.

<sup>1</sup>H NMR (600 MHz, H<sub>2</sub>O/D<sub>2</sub>O 9:1, noesygppr1d) (*2-acetamido-1-iminoethyl*)proline, mixture of rotamers [A:B, 63:37], **3P** (major rotamer: A, ●) (partial assignment): δ<sub>H</sub> 4.53 (1H, dd, *J* = 8.8, 2.5 Hz, Pro-αH-COOH), 4.29 (1H, AB, *J* = 17.3 Hz, AcNHCHH), 4.05 (1H, AB, *J* = 17.3 Hz, AcNHCHH), 3.67-3.63 (1H, m, NCHHCH<sub>2</sub>CH<sub>2</sub>), 3.56-3.52 (1H, m, NCHHCH<sub>2</sub>CH<sub>2</sub>), 2.08 (3H, s, H<sub>3</sub>C(CO)), (minor rotamer: B, ●) (partial assignment): δ<sub>H</sub> 4.40 (1H, dd, *J* = 8.5, 2.5 Hz, Pro-αH-COOH), 4.36 (1H, AB, *J* = 17.5 Hz, AcNHCHH), 4.29 (1H, AB, *J* = 17.5 Hz, AcNHCHH), 3.78-3.75 (1H, m, NCHHCH<sub>2</sub>CH<sub>2</sub>), 3.71-3.68 (1H, m, NCHHCH<sub>2</sub>CH<sub>2</sub>), 2.10 (3H, s, H<sub>3</sub>C(CO)); *L*-proline, **2P** (■) (partial assignment): δ<sub>H</sub> 4.10 (1H, dd, *J* = 8.9, 6.6 Hz, αH-COOH), 3.40 (1H, dt, *J* = 11.6, 7.0 Hz, HNCHHCH<sub>2</sub>CH<sub>2</sub>), 3.31 (1H, dt, *J* = 11.6, 7.0 Hz, HNCHHCH<sub>2</sub>CH<sub>2</sub>); *N*-acetyl glycine nitrile, **7** (✕) (partial assignment): δ<sub>H</sub> 3.89 (2H, s, CH<sub>2</sub>).

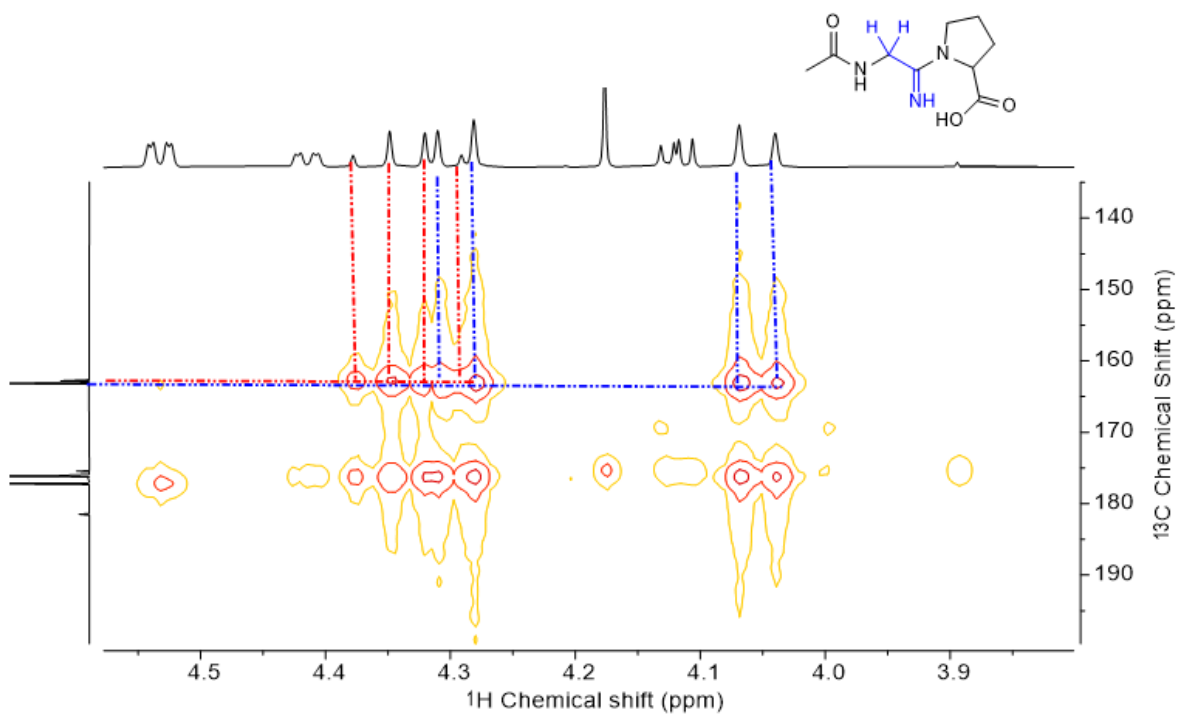

**Figure S44:**  $^1\text{H}$ - $^{13}\text{C}$  HMBC ( $^1\text{H}$ : 600 MHz [3.5-4.5 ppm],  $^{13}\text{C}$ : 176 MHz [150-180 ppm],  $\text{H}_2\text{O}/\text{D}_2\text{O}$  9:1) spectrum showing the diagnostic  $^2J_{\text{CH}}$  coupling of the Gly- $\text{CH}_2$  AB systems in both rotamers of **3p** at 4.37 and 4.34, 4.31 and 4.28, 4.30 and 4.29, and 4.06 and 4.03 ppm with two resonances at 163.2 and 162.7 ppm, which is characteristic of amidine bond formation of **2p**.

Coupling of **1** with L-serine **2s** at pH 8.5 and room temperature

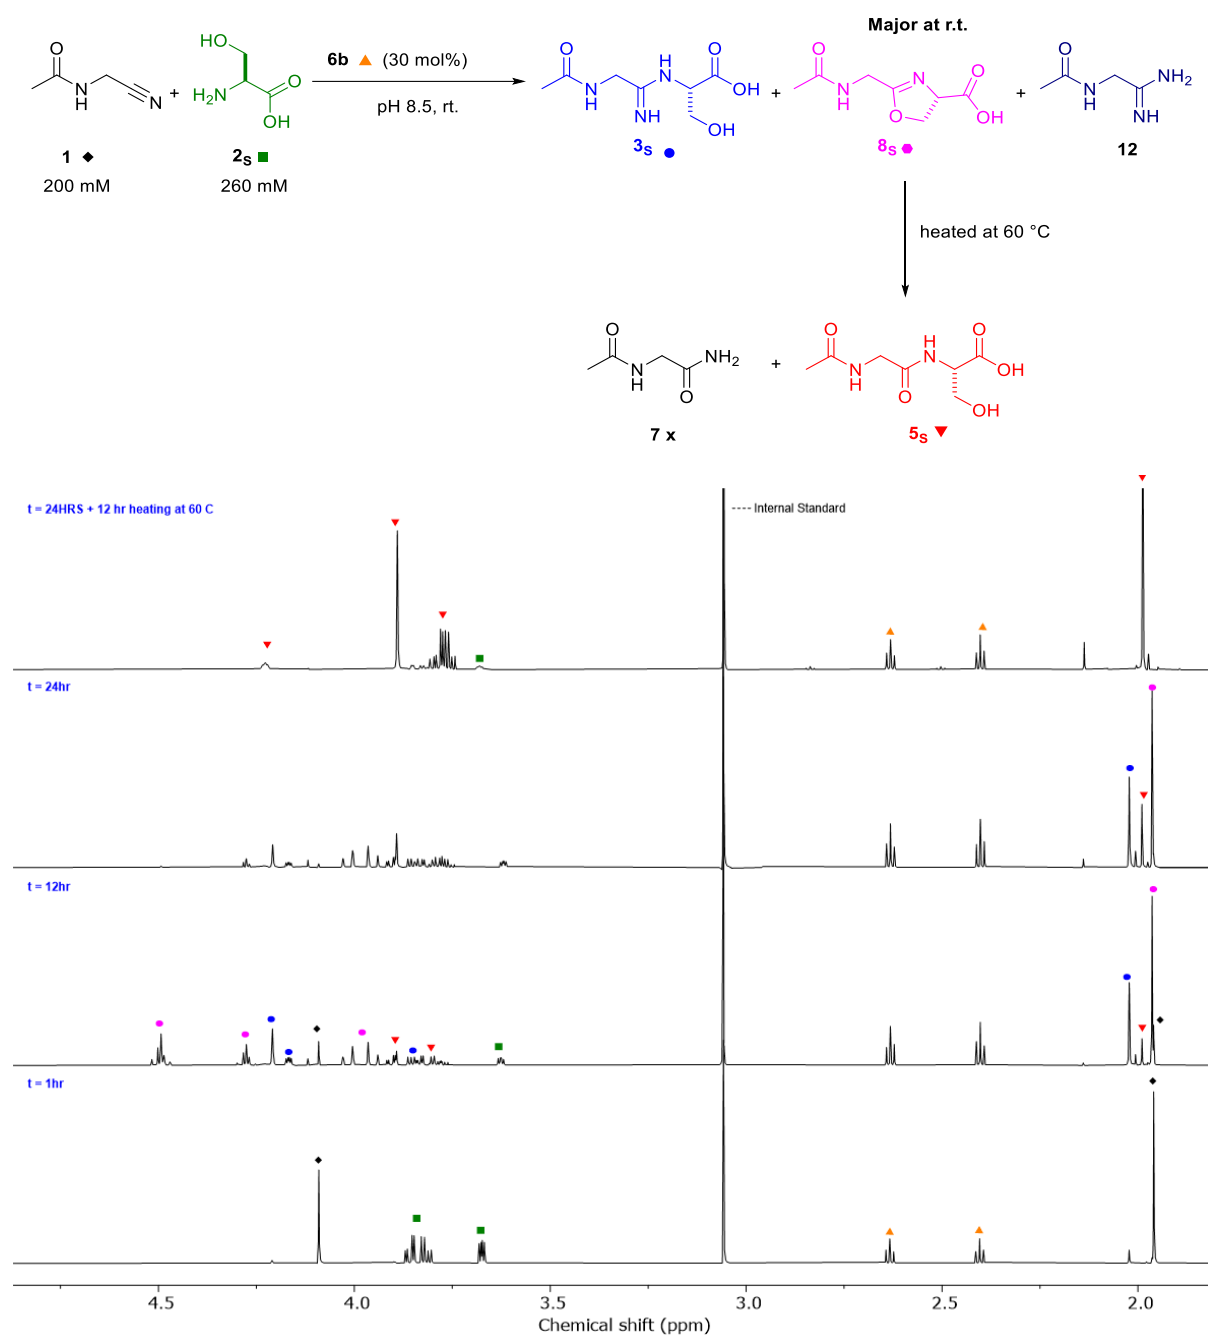

**Figure S45:** <sup>1</sup>H NMR (600 MHz, H<sub>2</sub>O/D<sub>2</sub>O 9:1, noesygppr1d, 1.8-5.0 ppm) spectrum to show the reaction of N-acetyl glycine nitrile (**1**, 200 mM) with L-serine (**2s**, 260 mM) and 3-mercaptopropanoic acid (**6b**, 60 mM) with MSM (100 mM) as an internal standard at pH 8.5 and room temperature.

After 24 h the following species were observed:

<sup>1</sup>H NMR (700 MHz, H<sub>2</sub>O/D<sub>2</sub>O 9:1, noesygppr1d): partial assignment for (2-acetamido-1-iminoethyl)serine, **3s** (●): δ<sub>H</sub> 4.24 (2H, s, br., AcNHCH<sub>2</sub>), 4.20 (1H, ABX, *J* = 5.8, 3.4 Hz, Ser-αH-COOH), 4.00-3.97 (1H, obs., CHCHHOH), 3.94 (1H, ABX, *J* = 11.9, 3.4 Hz, CHCHHOH), 2.02 (3H, s, H<sub>3</sub>C(CO)); partial assignment for 2-(acetamidomethyl)-4,5-dihydrooxazole-4-carboxylic acid **8s** (●): δ<sub>H</sub> 4.60-4.48 (2H, m, CHHCHCOOH), 4.31 (1H, dd, *J* = 5.5, 4.8 Hz,

CHHCHCOOH), 4.05 (1H, d,  $J = 17.3, 1.4$  Hz, AcNHCHH), 3.99 (1H, AB,  $J = 17.3$  Hz, 1.4 Hz, AcNHCHH), 2.00 (3H, s,  $H_3C(CO)$ ).

After complete consumption of **1** the reaction was heated at 60°C for 16 h, which resulted in the formation of **5s**.

$^1\text{H}$  NMR (700 MHz,  $\text{H}_2\text{O}/\text{D}_2\text{O}$  9:1, noesygppr1d): *N*-Acetylglycylserine, **5s** (▼):  $\delta_{\text{H}}$  4.27 (1H, t,  $J = 4.7$  Hz, Ser- $\alpha\text{H-COOH}$ ), 3.93 (2H, s, AcNHCH<sub>2</sub>), 3.89-3.61 (2H, m, CHCH<sub>2</sub>OH), 2.03 (3H, s,  $H_3C(CO)$ ); *L*-serine, **2s** (■):  $\delta_{\text{H}}$  3.92-3.86 (2H, m, CHCH<sub>2</sub>OH), 3.73-3.70 (1H, br. t,  $J = 4.4$  Hz,  $\alpha\text{H-COOH}$ ); *N*-acetylglucosylamine, **7** (✕): (partial assignment)  $\delta_{\text{H}}$  3.85 (2H, s, CH<sub>2</sub>).

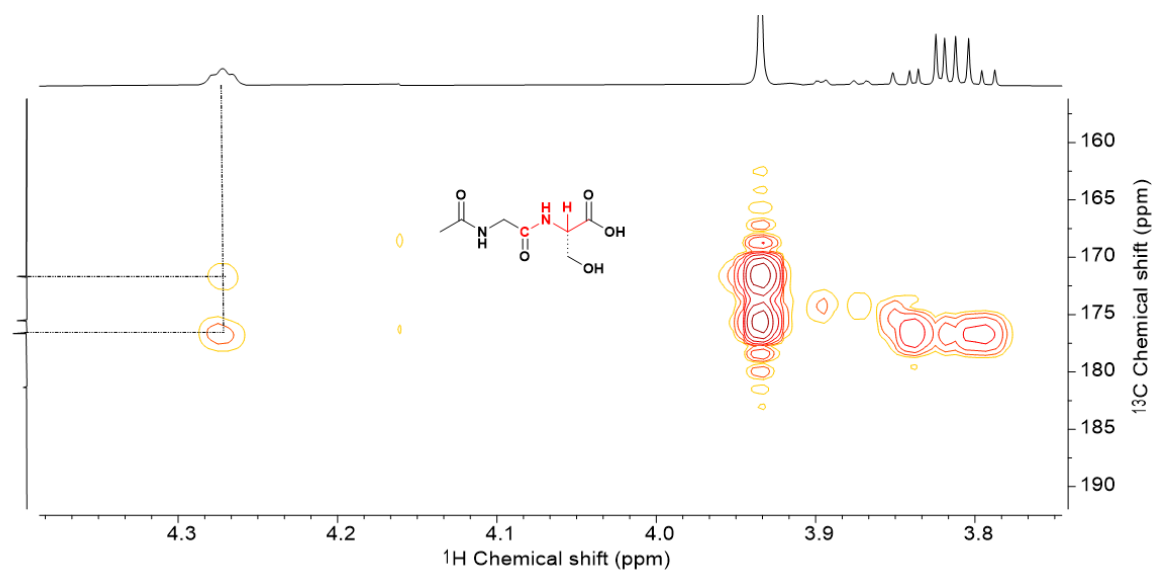

**Figure S46:**  $^1\text{H}$ - $^{13}\text{C}$  HMBC ( $^1\text{H}$ : 700 MHz [3.7–4.4 ppm],  $^{13}\text{C}$ : 176 MHz [150–185 ppm],  $\text{H}_2\text{O}/\text{D}_2\text{O}$  9:1) spectrum showing the diagnostic  $^2J_{\text{CH}}$  and  $^3J_{\text{CH}}$  coupling of the Ser- $\alpha\text{H-COOH}$  in **5s** at 4.27 ppm with two resonances at 176.6 and 171.7 ppm, which is characteristic of amide bond formation of **2s**.



Coupling of **1** with *L*-tryptophan **2<sub>w</sub>** at pH 8.5 and room temperature

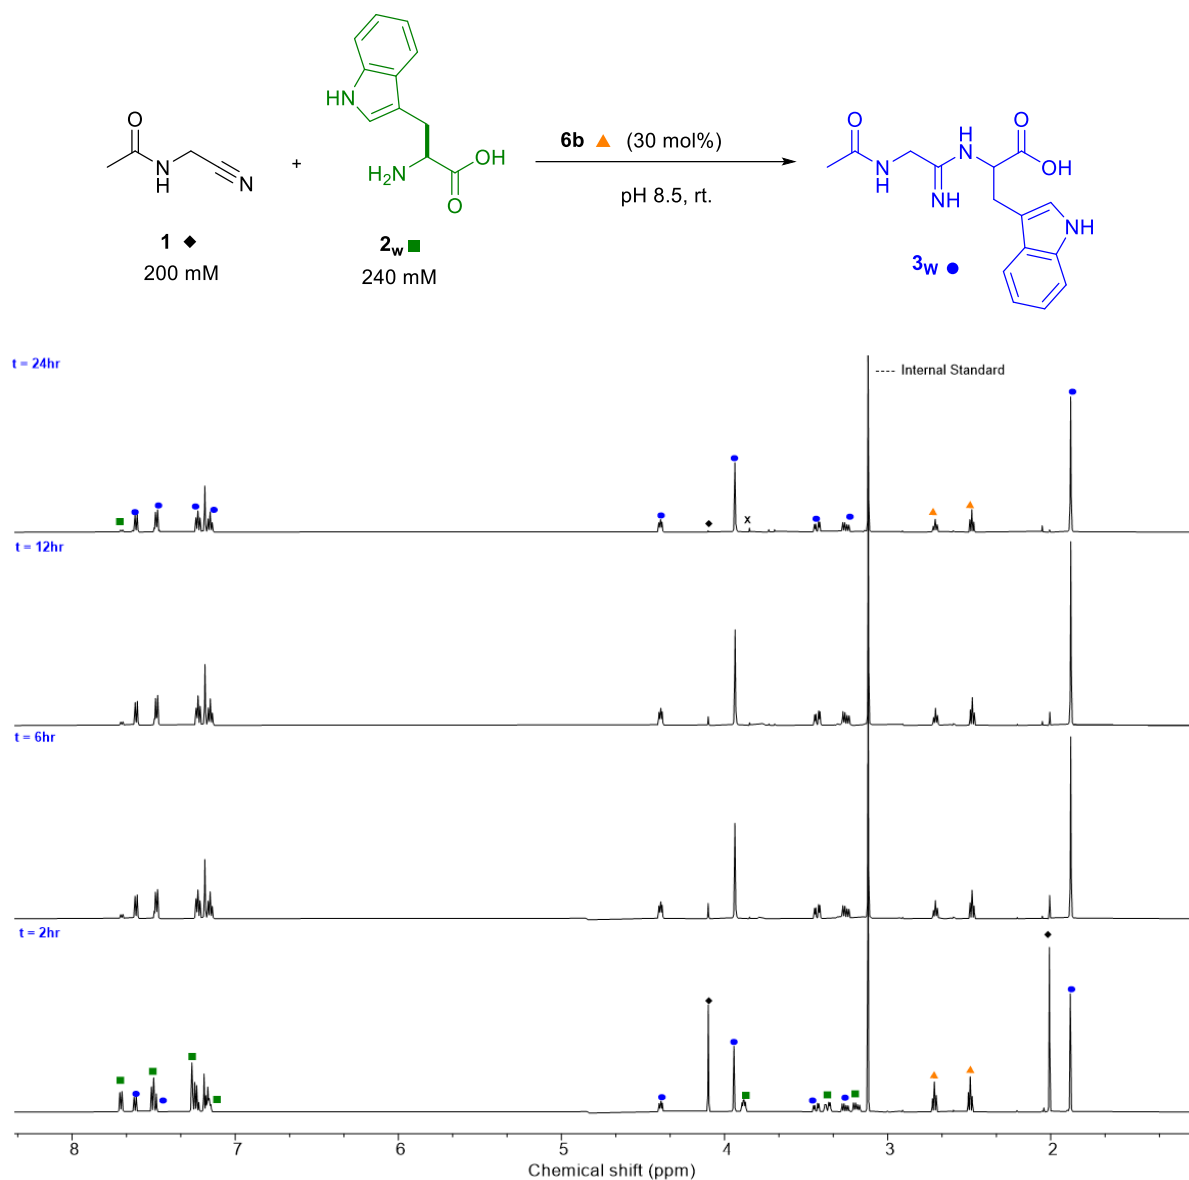

**Figure S47:** <sup>1</sup>H NMR (600 MHz, H<sub>2</sub>O/D<sub>2</sub>O 9:1, noesygppr1d, 1.0-8.0 ppm) spectrum to show the reaction of *N*-acetyl glycine nitrile (**1**, 200 mM) with *L*-tryptophan (**2<sub>w</sub>**, 238 mM) and 3-mercapto-propanoic acid (**6b** 60 mM) with MSM (100 mM) as an internal standard at pH 8.5 and room temperature.

<sup>1</sup>H NMR (600 MHz, H<sub>2</sub>O/D<sub>2</sub>O 9:1, noesygppr1d) (2-acetamido-1-iminoethyl)tryptophan, **3<sub>w</sub>** (●): δ<sub>H</sub> 7.65 (1H, d, *J* = 8.3 Hz, *ArH*), 7.48 (1H, d, *J* = 8.6 Hz, *ArH*), 7.21-7.25 (1H, m, *ArH*), 7.19 (1H, br, *ArH*), 7.15 (1H, t, *J* = 7.5 Hz, *ArH*), 4.39 (1H, ABX, *J* = 7.3, 4.7 Hz, Trp-αH-COOH), 3.94 (2H, s, AcNHCH<sub>2</sub>), 3.43 (1H, ABX, *J* = 15.1, 4.7 Hz, CHCHHAr), 3.26 (1H, ABX, *J* = 15.1, 7.3 Hz, CHCHHAr), 1.88 (3H, s, H<sub>3</sub>C(CO)); *L*-tryptophan, **2<sub>w</sub>** (■): δ<sub>H</sub> 7.67 (1H, d, *J* = 8.1 Hz, *ArH*), 7.46 (1H, d, *J* = 8.1 Hz, *ArH*), 7.22 (1H, s, *ArH*), 7.21-7.19 (1H, m, *ArH*), 7.14-7.11 (1H, m, *ArH*), 3.83 (1H, ABX, *J* = 7.7, 4.9 Hz, αH-COOH), 3.32 (1H, dd, *J* = 15.1, 4.9 Hz, CHCHHAr), 3.17 (1H, ABX, *J* = 15.1, 7.7 Hz, CHCHHAr); *N*-acetylglycinamide, **7** (×) (partial assignment): δ<sub>H</sub> 3.84 (2H, s, CH<sub>2</sub>).

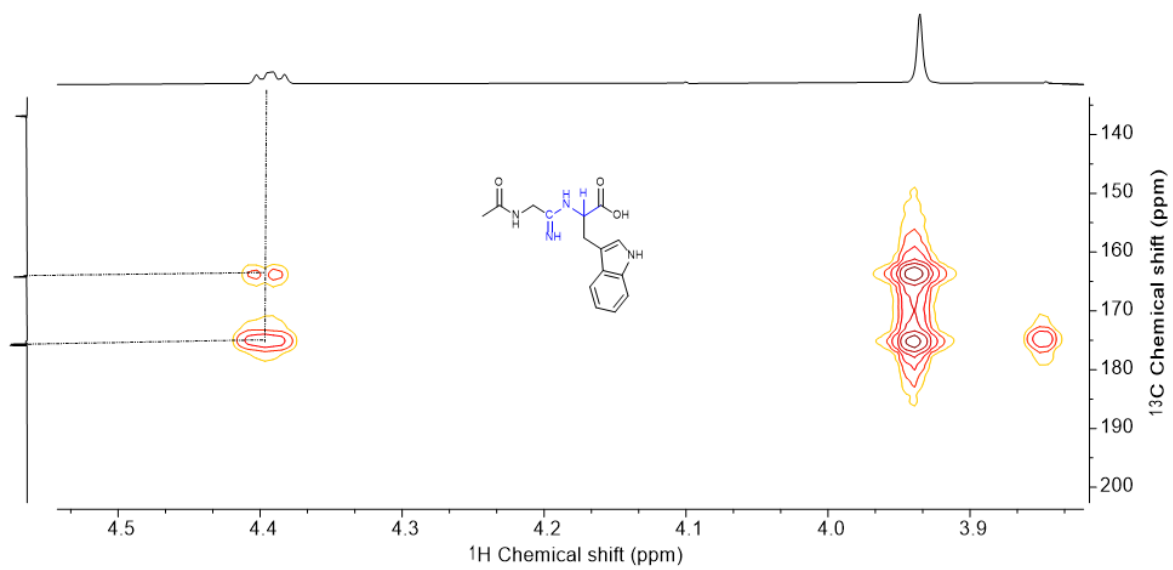

**Figure S48:**  $^1\text{H}$ - $^{13}\text{C}$  HMBC ( $^1\text{H}$ : 600 MHz [3.7–5.0 ppm],  $^{13}\text{C}$ : 176 MHz [140–200 ppm],  $\text{H}_2\text{O}/\text{D}_2\text{O}$  9:1) spectrum showing the diagnostic  $^2\text{J}_{\text{CH}}$  and  $^3\text{J}_{\text{CH}}$  coupling of the Trp- $\alpha$ H-COOH in **3w** at 4.39 ppm with two resonances at 175.7 and 164.2 ppm, which is characteristic of amidine bond formation of **2w**.

Coupling of **1** with L-threonine **2<sub>T</sub>** at pH 8.5 and room temperature

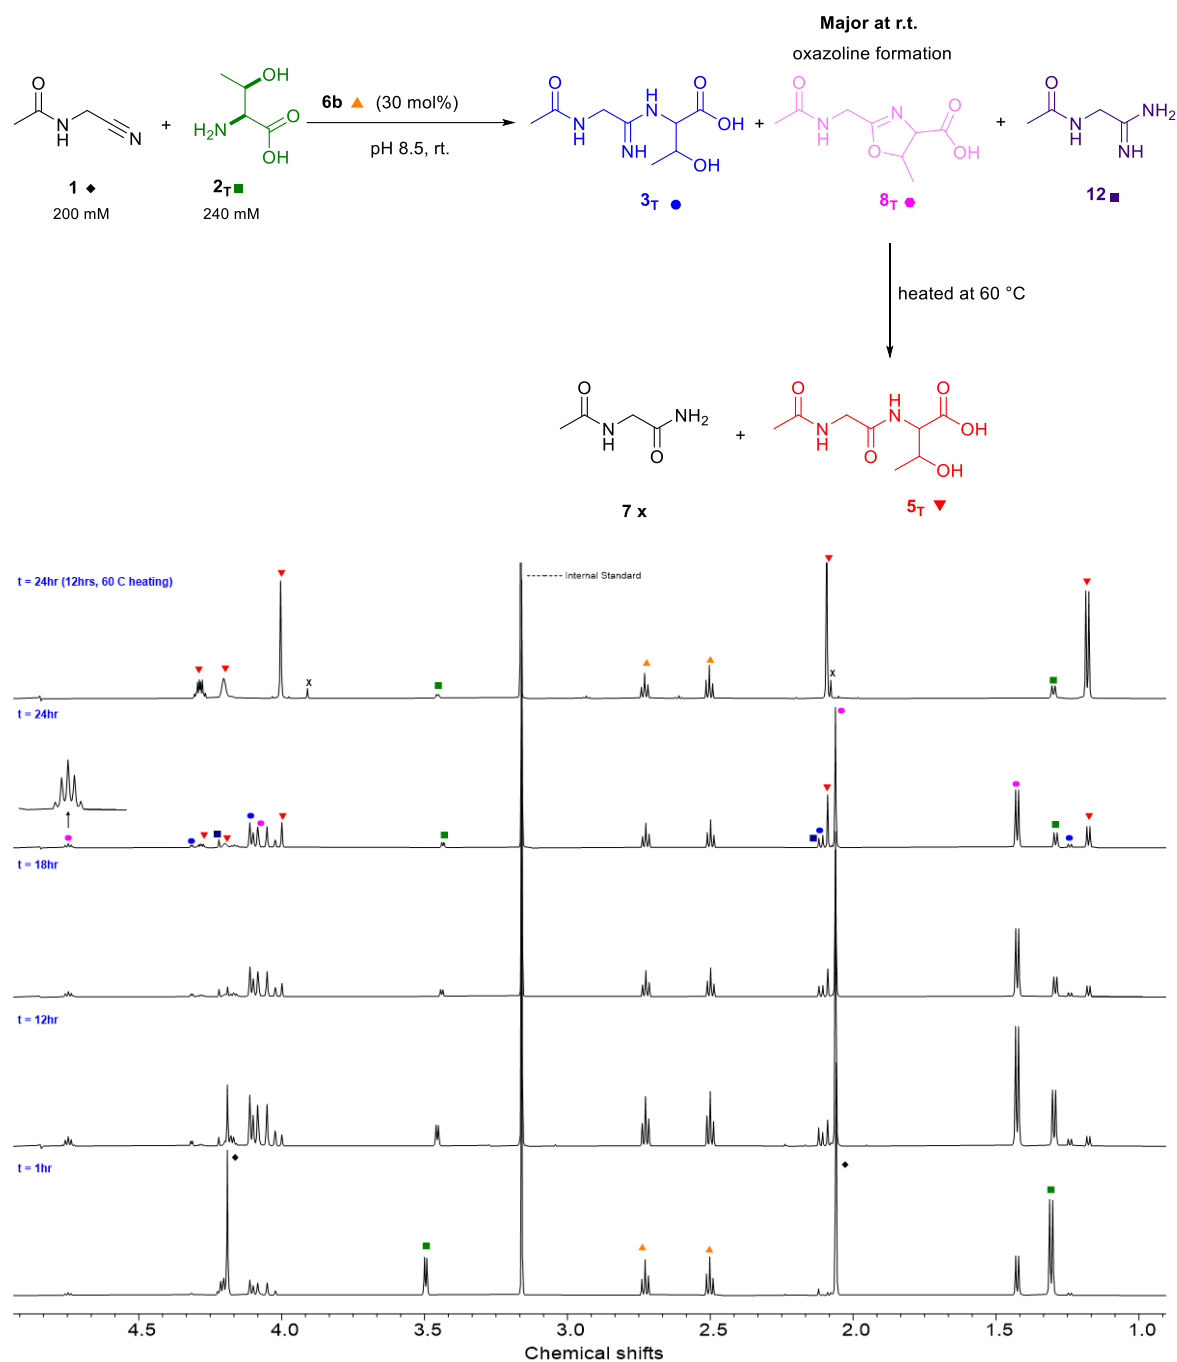

**Figure S49:** <sup>1</sup>H NMR (600 MHz, H<sub>2</sub>O/D<sub>2</sub>O 9:1, noesygppr1d, 1.0–4.7 ppm) spectrum to show the reaction of N-acetyl glycine nitrile (**1**, 200 mM) with L-threonine (**2<sub>T</sub>**, 240 mM) and 3-Mercaptopropanoic acid (**6b**, 60 mM) with MSM (100 mM) as an internal standard at pH 9 and room temperature.

After 24 h following species were observed:

2-(Acetamidomethyl)-5-methyl-4,5-dihydrooxazole-4-carboxylic acid, **8<sub>T</sub>** (●) (partial assignment - OCHCH<sub>3</sub> resonance partially suppressed due to proximity to the HOD peak),  $\delta_{\text{H}}$  4.75 (1H, p,  $J = 6.3$  Hz, OCHCH<sub>3</sub>), 4.09 (1H, AB,  $J = 17.4$  Hz, AcNHCHH), 4.03 (1H, AB,  $J = 17.4$  Hz, AcNHCHH), 2.06 (3H, s, H<sub>3</sub>C(CO)), 1.43 (3H, d,  $J = 6.3$  Hz, HOCHCH<sub>3</sub>); **3<sub>T</sub>** (●)  $\delta_{\text{H}}$  4.40 (1H, qd,  $J = 6.4, 3.7$  Hz, HOCHCH<sub>3</sub>), 4.32 (1H, br, Thr- $\alpha$ H-COOH) and **12** (■) (partial assignment):  $\delta_{\text{H}}$  4.24 (2H, s, CH<sub>2</sub>).

After complete consumption of **1** the reaction was heated at 60°C for 16 h, which resulted in formation of **5<sub>T</sub>**.

<sup>1</sup>H NMR (600 MHz, H<sub>2</sub>O/D<sub>2</sub>O 9:1, noesygppr1d) *N*-Acetylthreonine, **5<sub>T</sub>** (♥): δ<sub>H</sub> 4.29 (1H, qd, *J* = 6.4, 3.7 Hz, HOCHCH<sub>3</sub>), 4.20 (1H, br, Thr-αH-COOH), 4.03 (1H, AB, *J* = 17.3 Hz, AcNHCHH), 4.00 (1H, AB, *J* = 17.3 Hz, AcNHCHH), 2.09 (3H, s, H<sub>3</sub>C(CO)), 1.18 (3H, d, *J* = 6.5 Hz, HOCHCH<sub>3</sub>); *L*-threonine, **2<sub>T</sub>** (■): 3.45 (1H, d, *J* = 4.8 Hz, αH-COOH), 1.30 (3H, d, *J* = 6.6 Hz, HOCHCH<sub>3</sub>); *N*-acetylglycinamide, **7** (✕) (partial assignment): δ<sub>H</sub> 3.91 (2H, s, CH<sub>2</sub>), 2.08 (3H, s, H<sub>3</sub>C(CO)).

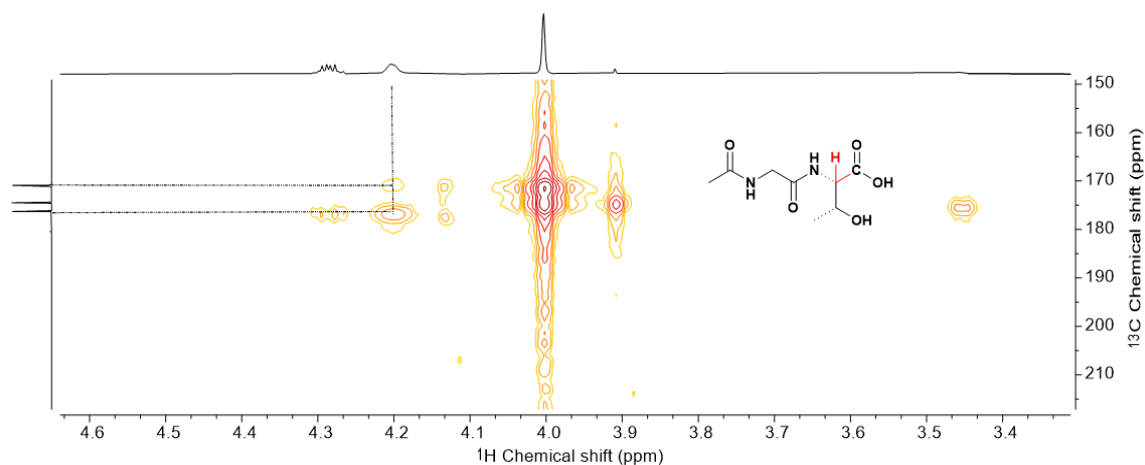

**Figure S50:** <sup>1</sup>H-<sup>13</sup>C HMBC (<sup>1</sup>H: 700 MHz [3.4–4.6 ppm], <sup>13</sup>C: 176 MHz [150–185 ppm], H<sub>2</sub>O/D<sub>2</sub>O 9:1) spectrum showing the diagnostic <sup>2</sup>J<sub>CH</sub> and <sup>3</sup>J<sub>CH</sub> coupling of the Thr-αH-COOH in **5<sub>T</sub>** at 4.19 ppm with two resonances at 177.4 and 171.5 ppm, which is characteristic of amide bond formation of **2<sub>T</sub>**.

Coupling of **1** with L-valine **2v** at pH 8.5 and room temperature

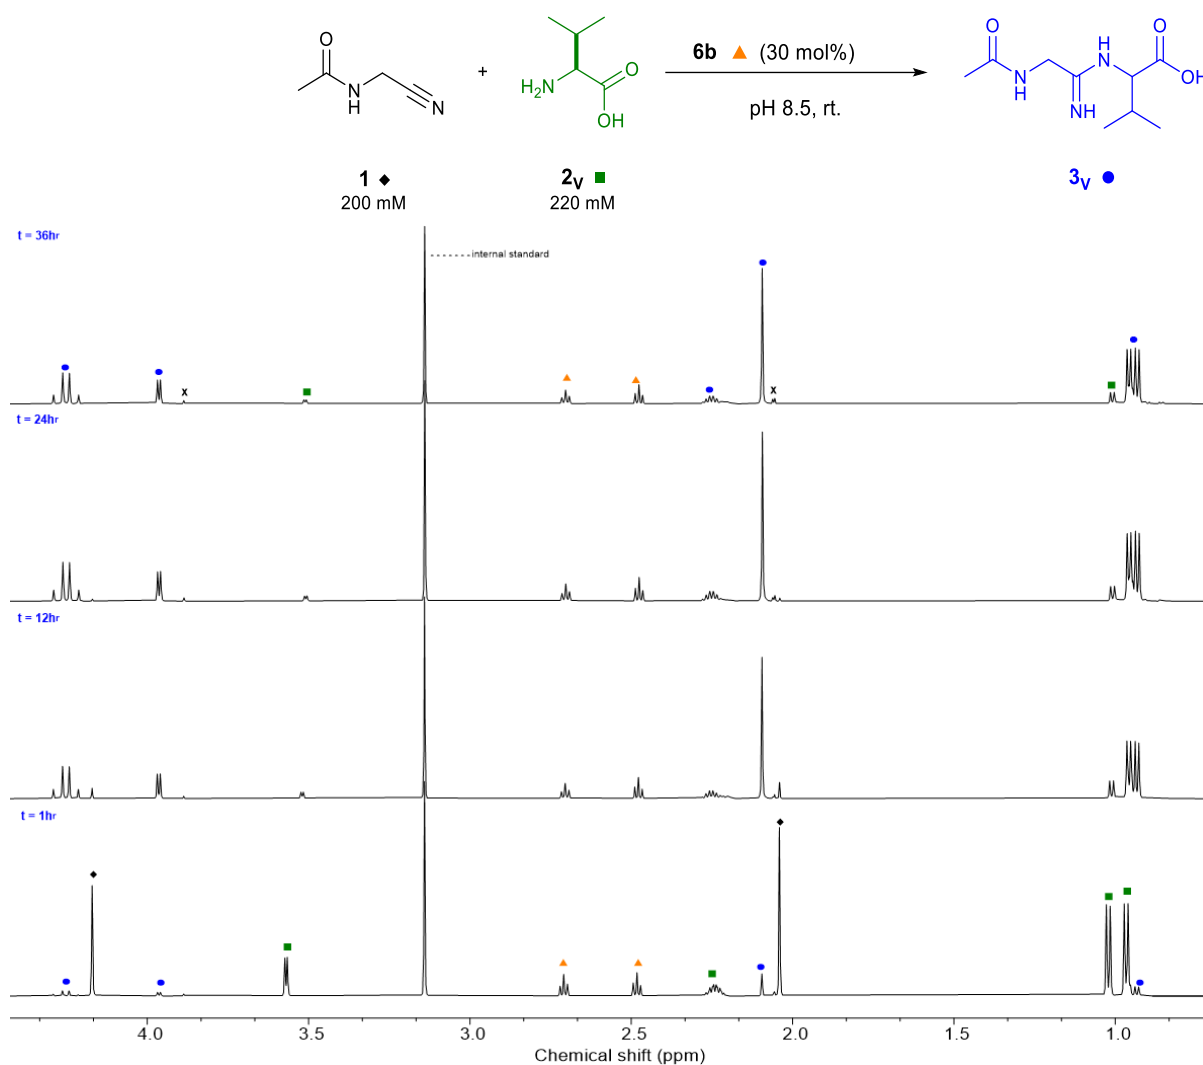

**Figure S51:**  $^1\text{H}$  NMR (600 MHz,  $\text{H}_2\text{O}/\text{D}_2\text{O}$  9:1, noesygppr1d, 0.8–5.0 ppm) spectrum to show the reaction of N-acetyl glycine nitrile (**1**, 200 mM) with L-valine (**2v**, 220 mM) and 3-mercaptopropanoic acid (**6b**, 60 mM) with MSM (100 mM) as an internal standard at pH 8.5 and room temperature.

$^1\text{H}$  NMR (600 MHz,  $\text{H}_2\text{O}/\text{D}_2\text{O}$  9:1, noesygppr1d) (2-acetamido-1-iminoethylvaline, **3v** (●):  $\delta_{\text{H}}$  4.28 (1H, AB,  $J = 17.1$  Hz, AcNHCHH), 4.23 (1H, AB,  $J = 17.1$  Hz, AcNHCHH), 3.97 (1H, d,  $J = 5.5$  Hz, Val- $\alpha$ H-COOH), 2.31-2.24 (1H, m,  $\text{H}_3\text{CCHCH}_3$ ), 2.10 (3H, s,  $\text{H}_3\text{C}(\text{CO})$ ), 0.95 (3H, d,  $J = 6.7$  Hz,  $\text{CH}_3$ ), 0.92 (3H, d,  $J = 7.0$  Hz,  $\text{CH}_3$ ); L-valine, **2v** (■):  $\delta_{\text{H}}$  3.53 (1H, br. d,  $J = 4.4$  Hz,  $\alpha$ H-COOH), 2.17-2.12 (1H, m,  $\text{H}_3\text{CCHCH}_3$ ), 1.02 (3H, d,  $J = 7.0$  Hz,  $\text{CH}_3$ ), 0.93 (3H, d,  $J = 7.0$  Hz,  $\text{CH}_3$ ); N-acetylglycinamide, **7** (×) (partial assignment):  $\delta_{\text{H}}$  3.90 (2H, s,  $\text{CH}_2$ ), 2.06 (3H, s,  $\text{CH}_3$ ).

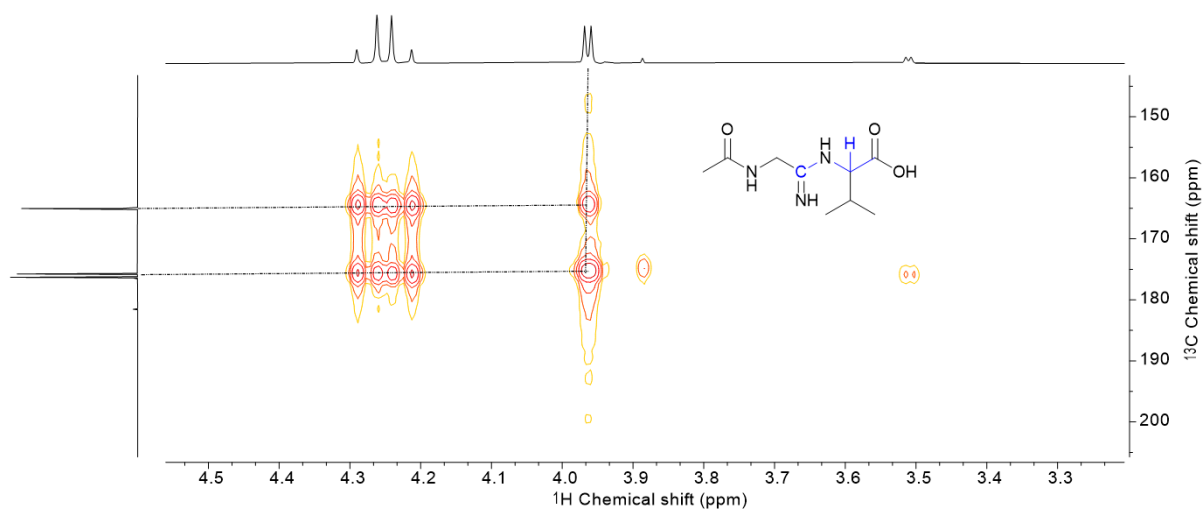

**Figure S52:**  $^1\text{H}$ - $^{13}\text{C}$  HMBC ( $^1\text{H}$ : 600 MHz [3.2–4.5 ppm],  $^{13}\text{C}$ : 176 MHz [150–185 ppm],  $\text{H}_2\text{O}/\text{D}_2\text{O}$  9:1) spectrum showing the diagnostic  $^2\text{J}_{\text{CH}}$  and  $^3\text{J}_{\text{CH}}$  coupling of the Val- $\alpha\text{H}$ -COOH in **3v** at 3.94 ppm with two resonances at 175.8 and 164.9 ppm, which is characteristic of amidine bond formation.

*Competitive coupling of **1** with glycine **2G** and ammonium chloride*

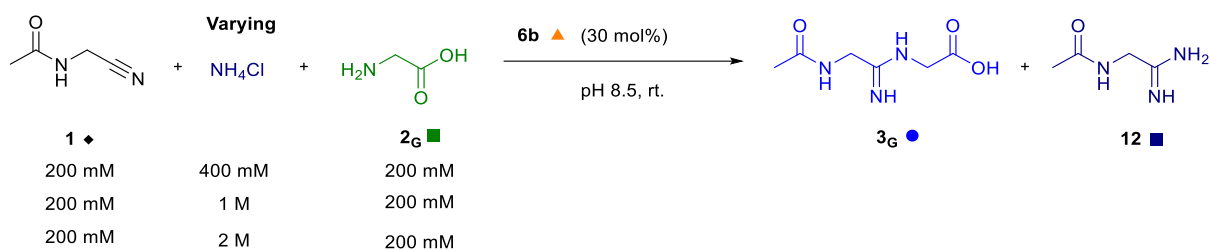

**Table S19:** Ratio for the formation of **3G**  $\bullet$  and **12**  $\blacksquare$

Reaction conditions are as following 3-mercaptopropanoic acid (**6b**, 60 mM)  $\blacktriangle$  catalyzed formation of **3G**  $\bullet$  and **12**  $\blacksquare$  from the coupling of N-acetyl glycine nitrile (**1**, 200 mM) with glycine (**2G**, 1 equiv.) and ammonium chloride (2 equiv., 5 equiv. and 10 equiv.) at pH 8.5, room temperature, after 12 h, unless stated otherwise.

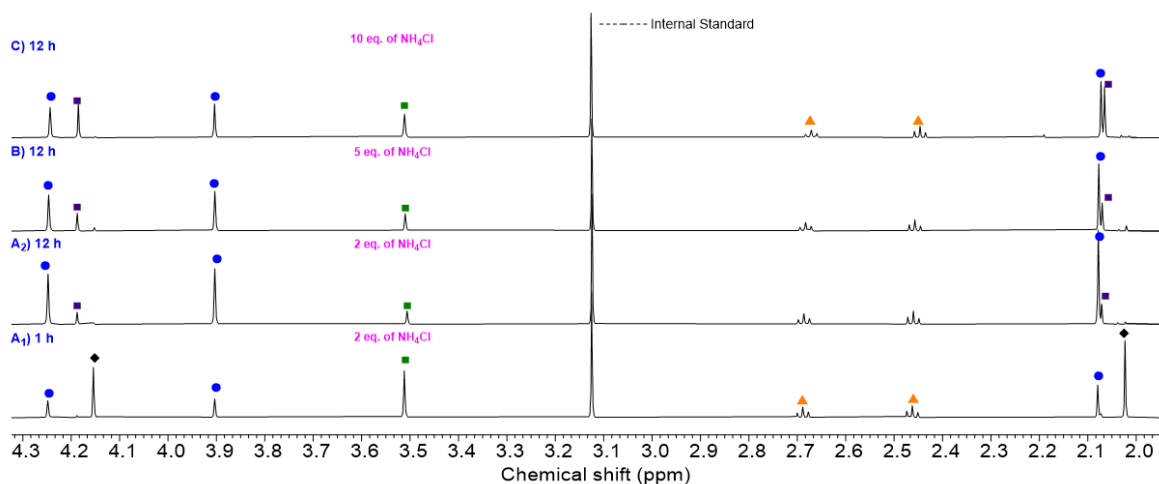

**Figure S53:**  $^1\text{H}$  NMR (600 MHz,  $\text{H}_2\text{O}/\text{D}_2\text{O}$  9:1, noesygppr1d, 1.0-5.0 ppm) spectrum to show the reaction of N-acetyl glycine nitrile (**1**, 200 mM) with glycine (**2G**, 200 mM), ammonium chloride ( $\text{NH}_4\text{Cl}$ , 2 equiv., 5 equiv. and 10 equiv.), and 3-mercaptopropanoic acid (**6b**, 60 mM) with MSM (100 mM) as an internal standard after 12 h at pH 8.5. A<sub>1</sub>)  $^1\text{H}$  spectrum shows reaction of **1** with 2 equiv. of  $\text{NH}_4\text{Cl}$  and 1 equiv. of **2G** after 1 hrs, A<sub>2</sub>) reaction of **1** with 2 equiv. of  $\text{NH}_4\text{Cl}$  and 1 equiv. of **2G** after 12 hrs B) reaction of **1** with 5 equiv. of  $\text{NH}_4\text{Cl}$  and 1 equiv. of **2G** after 12 hrs C) reaction of **1** with 10 equiv. of  $\text{NH}_4\text{Cl}$  and 1 equiv. of **2G** after 12 hrs.

$^1\text{H}$  NMR (600 MHz,  $\text{H}_2\text{O}/\text{D}_2\text{O}$  9:1, noesygppr1d) (2-acetamido-1-iminoethyl)glycine, **3G** (●):  $\delta_{\text{H}}$  4.26 (2H, s,  $\text{AcNHCH}_2$ ), 3.91 (2H, s, Gly- $\alpha\text{H-COOH}$ ), 2.09 (3H, s,  $\text{H}_3\text{C}(\text{CO})$ ); 2-(2-acetamidoacetimidamido)acetamide, **12** (■):  $\delta_{\text{H}}$  4.19 (2H, s,  $\text{AcNHCH}_2$ ), 2.08 (3H, s,  $\text{H}_3\text{C}(\text{CO})$ ); glycine, **2G** (■):  $\delta_{\text{H}}$  3.51 (2H, s,  $\text{CH}_2$ ).

Coupling of *N*-acetyl glycine nitrile **1** with  $\alpha$ -amino amides **2'** at pH 8.5 and room temperature

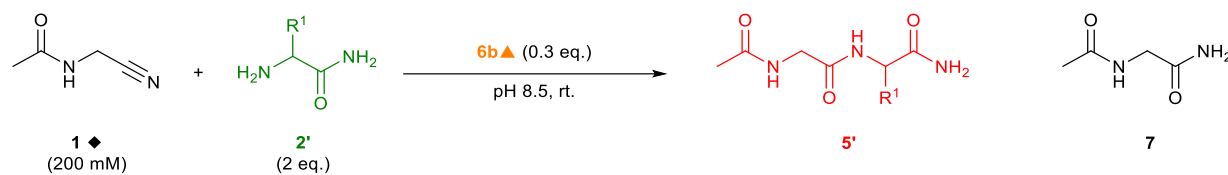

| Amino amide                                            | time / h | Yield /%  |          | HRMS FOR <b>5'</b>                                                              |             |                     |
|--------------------------------------------------------|----------|-----------|----------|---------------------------------------------------------------------------------|-------------|---------------------|
|                                                        |          | <b>5'</b> | <b>7</b> | Formula                                                                         | Theoretical | Found               |
| Glycinamide ( <b>2<sub>G'</sub></b> )                  | 144      | 50        | 5        | [C <sub>6</sub> H <sub>11</sub> N <sub>3</sub> O <sub>3</sub> +Na] <sup>+</sup> | 196.0693    | 196.0690 (ESI pos.) |
| L-Alaninamide ( <b>2<sub>A'</sub></b> )                | 144      | 76        | 8        | [C <sub>7</sub> H <sub>13</sub> N <sub>3</sub> O <sub>3</sub> +H] <sup>+</sup>  | 188.1030    | 188.1030 (ESI pos.) |
| L-Arginine amide ( <b>2<sub>R'</sub></b> )             | 120      | 80        | 18       | [C <sub>10</sub> H <sub>15</sub> N <sub>3</sub> O <sub>5</sub> +H] <sup>+</sup> | 273.1670    | 273.1669 (ESI pos.) |
| L-Asparagine amide ( <b>2<sub>N'</sub></b> )           | 240      | 50        | 45       | [C <sub>8</sub> H <sub>14</sub> N <sub>4</sub> O <sub>4</sub> +Na] <sup>+</sup> | 253.0907    | 253.0910 (ESI pos.) |
| L-Aspartate amide ( <b>2<sub>P'</sub></b> )            | 144      | 83        | 17       | [C <sub>8</sub> H <sub>13</sub> N <sub>3</sub> O <sub>5</sub> +Na] <sup>+</sup> | 254.0747    | 254.0749 (ESI pos.) |
| L-Glutamine amide ( <b>2<sub>Q'</sub></b> )            | 120      | 66        | 19       | [C <sub>9</sub> H <sub>16</sub> N <sub>4</sub> O <sub>4</sub> +H] <sup>+</sup>  | 245.1244    | 245.1243 (ESI pos.) |
| L-Glutamate amide ( <b>2<sub>E'</sub></b> )            | 120      | 84        | 15       | [C <sub>9</sub> H <sub>15</sub> N <sub>3</sub> O <sub>5</sub> +Na] <sup>+</sup> | 268.0904    | 268.0905 (ESI pos.) |
| L-Histidine amide ( <b>2<sub>H'</sub></b> )            | 125      | 84        | 13       | [C <sub>10</sub> H <sub>15</sub> N <sub>5</sub> O <sub>3</sub> +H] <sup>+</sup> | 254.1248    | 254.1246 (ESI pos.) |
| L-Isoleucinamide ( <b>2<sub>I'</sub></b> )             | 168      | 86        | 8        | [C <sub>10</sub> H <sub>19</sub> N <sub>3</sub> O <sub>3</sub> +H] <sup>+</sup> | 230.1499    | 230.1496 (ESI pos.) |
| L-Leucinamide ( <b>2<sub>L'</sub></b> )                | 144      | 81        | 12       | [C <sub>10</sub> H <sub>19</sub> N <sub>3</sub> O <sub>3</sub> +H] <sup>+</sup> | 230.1499    | 230.1499 (ESI pos.) |
| L-Lysinamide ( <b>2<sub>K'</sub></b> )                 | 120      | 42        | 16       | [C <sub>10</sub> H <sub>12</sub> N <sub>4</sub> O <sub>3</sub> +H] <sup>+</sup> | 245.1608    | 245.1608 (ESI pos.) |
| (DL)-Methioninamide ( <b>2<sub>M'</sub></b> )          | 120      | 63        | 22       | [C <sub>9</sub> H <sub>17</sub> N <sub>3</sub> O <sub>3</sub> +Na] <sup>+</sup> | 270.0883    | 270.0887 (ESI pos.) |
| L-Phenylalaninamide ( <b>2<sub>F'</sub></b> )          | 125      | 73        | 23       | [C <sub>13</sub> H <sub>17</sub> N <sub>3</sub> O <sub>3</sub> +H] <sup>+</sup> | 264.1343    | 164.1341 (ESI pos.) |
| L-Prolinamide ( <b>2<sub>P'</sub></b> )                | 144      | 85        | 6        | [C <sub>9</sub> H <sub>15</sub> N <sub>3</sub> O <sub>3</sub> +H] <sup>+</sup>  | 214.1186    | 214.1185 (ESI pos.) |
| L-Serinamide <sup>a</sup> ( <b>2<sub>S'</sub></b> )    | 36       | 74        |          | [C <sub>7</sub> H <sub>13</sub> N <sub>3</sub> O <sub>4</sub> +H] <sup>+</sup>  | 204.0979    | 204.0981 (ESI pos.) |
| L-Threoninamide <sup>a</sup> ( <b>2<sub>T'</sub></b> ) | 36       | 85        |          | [C <sub>8</sub> H <sub>15</sub> N <sub>3</sub> O <sub>4</sub> +H] <sup>+</sup>  | 218.1135    | 218.1134 (ESI pos.) |
| L-Tryptophan amide ( <b>2<sub>W'</sub></b> )           | 144      | 82        | 14       | [C <sub>15</sub> H <sub>18</sub> N <sub>4</sub> O <sub>3</sub> -H] <sup>-</sup> | 301.1306    | 301.1306 (ESI neg.) |
| L-Valinamide ( <b>2<sub>V'</sub></b> )                 | 132      | 90        | 10       | [C <sub>9</sub> H <sub>17</sub> N <sub>3</sub> O <sub>3</sub> +H] <sup>+</sup>  | 216.1343    | 216.1342 (ESI pos.) |
| L-Tyrosine amide ( <b>2<sub>Y'</sub></b> )             | 97       | 85        | 10       | [C <sub>13</sub> H <sub>17</sub> N <sub>3</sub> O <sub>4</sub> -H] <sup>-</sup> | 278.1146    | 278.1147 (ESI neg.) |

**Table S20:** Yields and ESI-HRMS data for 3-mercaptopropanoic acid (**6b**, 60 mM) catalyzed formation of peptide **5'** from the coupling of *N*-acetyl glycine nitrile (**1**, 200 mM) with aminoamide (**2'**, 2.0 equiv.) at pH 8.5, room temperature, unless stated otherwise. Two equiv. of amino amide were used due to the low pKa of these compounds.

<sup>a</sup> pH 7, 60 °C



Coupling of *N*-acetylglycine nitrile **1** with *L*-alaninamide **2A'** at pH 8.5 and room temperature

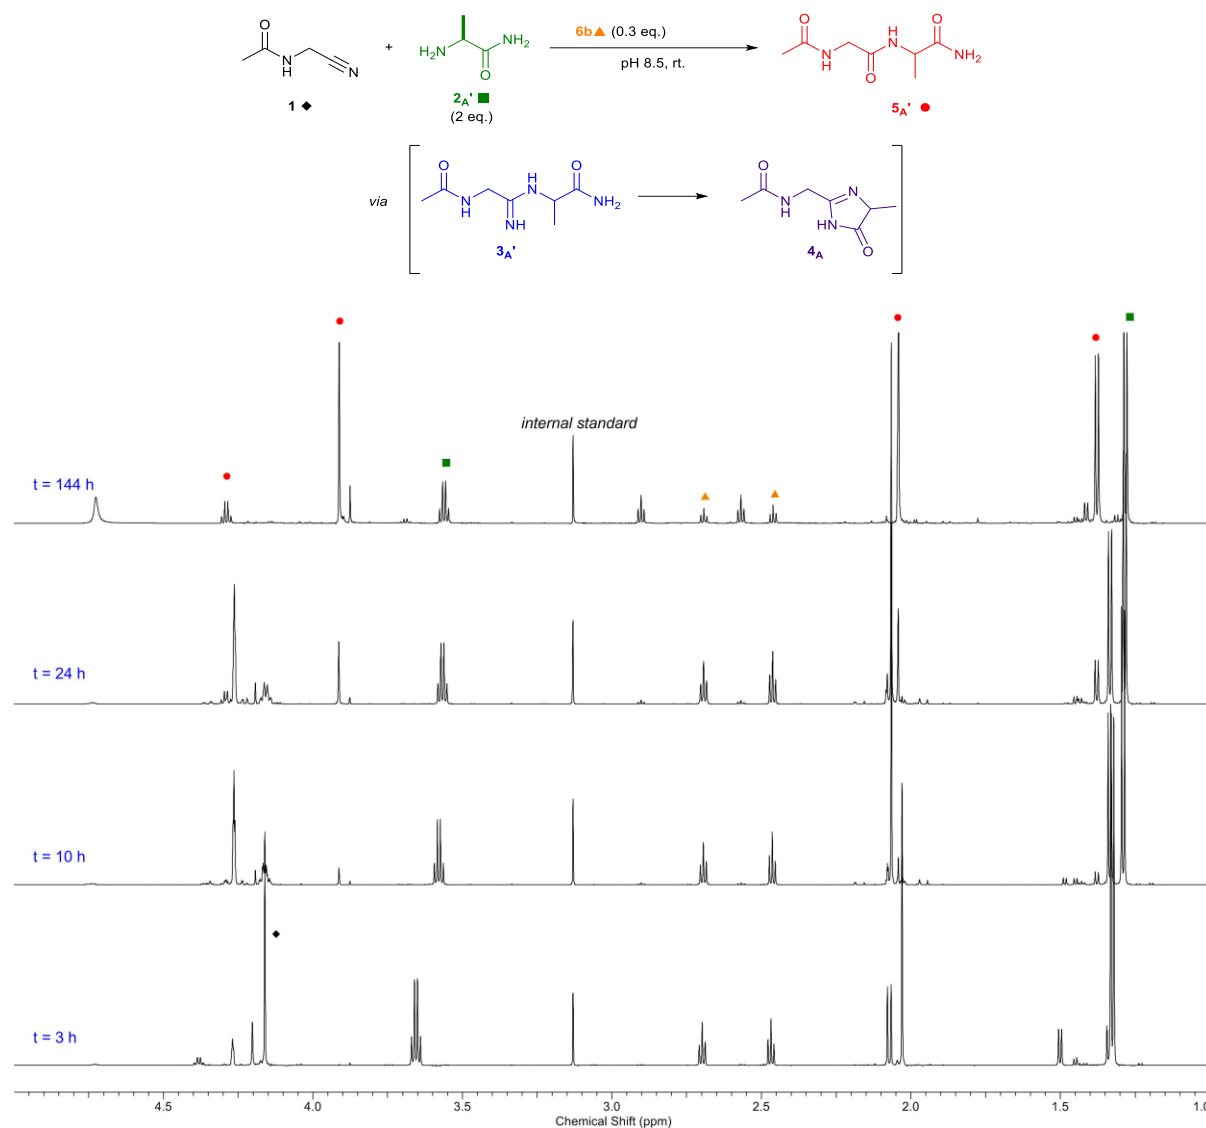

**Figure S54:** <sup>1</sup>H NMR (700 MHz, H<sub>2</sub>O/D<sub>2</sub>O 9:1, noesygppr1d, 1.0-5.0 ppm) spectrum to show the reaction of *N*-acetyl glycine nitrile (**1**, 200 mM) with *L*-alaninamide (**2A'**, 400 mM) and 3-mercaptothiopropanoic acid (**6b**, 60 mM), with MSM (7 mM) as an internal standard, at pH 8.5, room temperature.

<sup>1</sup>H NMR (700 MHz, H<sub>2</sub>O/D<sub>2</sub>O 9:1) **5A'** (●): δ<sub>H</sub> 4.29 (1H, q, *J* = 7.3 Hz, CH(CH<sub>3</sub>)), 3.91 (2H, s, CH<sub>2</sub>CONH), 2.04 (3H, s, H<sub>3</sub>C(CO)), 1.37 (3H, d, *J* = 7.3 Hz, CH(CH<sub>3</sub>)); *L*-alaninamide, **2A'** (■): δ<sub>H</sub> 3.56 (1H, q, *J* = 7.2 Hz, CH(CH<sub>3</sub>)), 1.29 (3H, d, *J* = 7.2 Hz, CH(CH<sub>3</sub>)); *N*-acetylglycinamide, **7** (✕) (partial assignment): δ<sub>H</sub> 3.89 (2H, d, CH<sub>2</sub>).

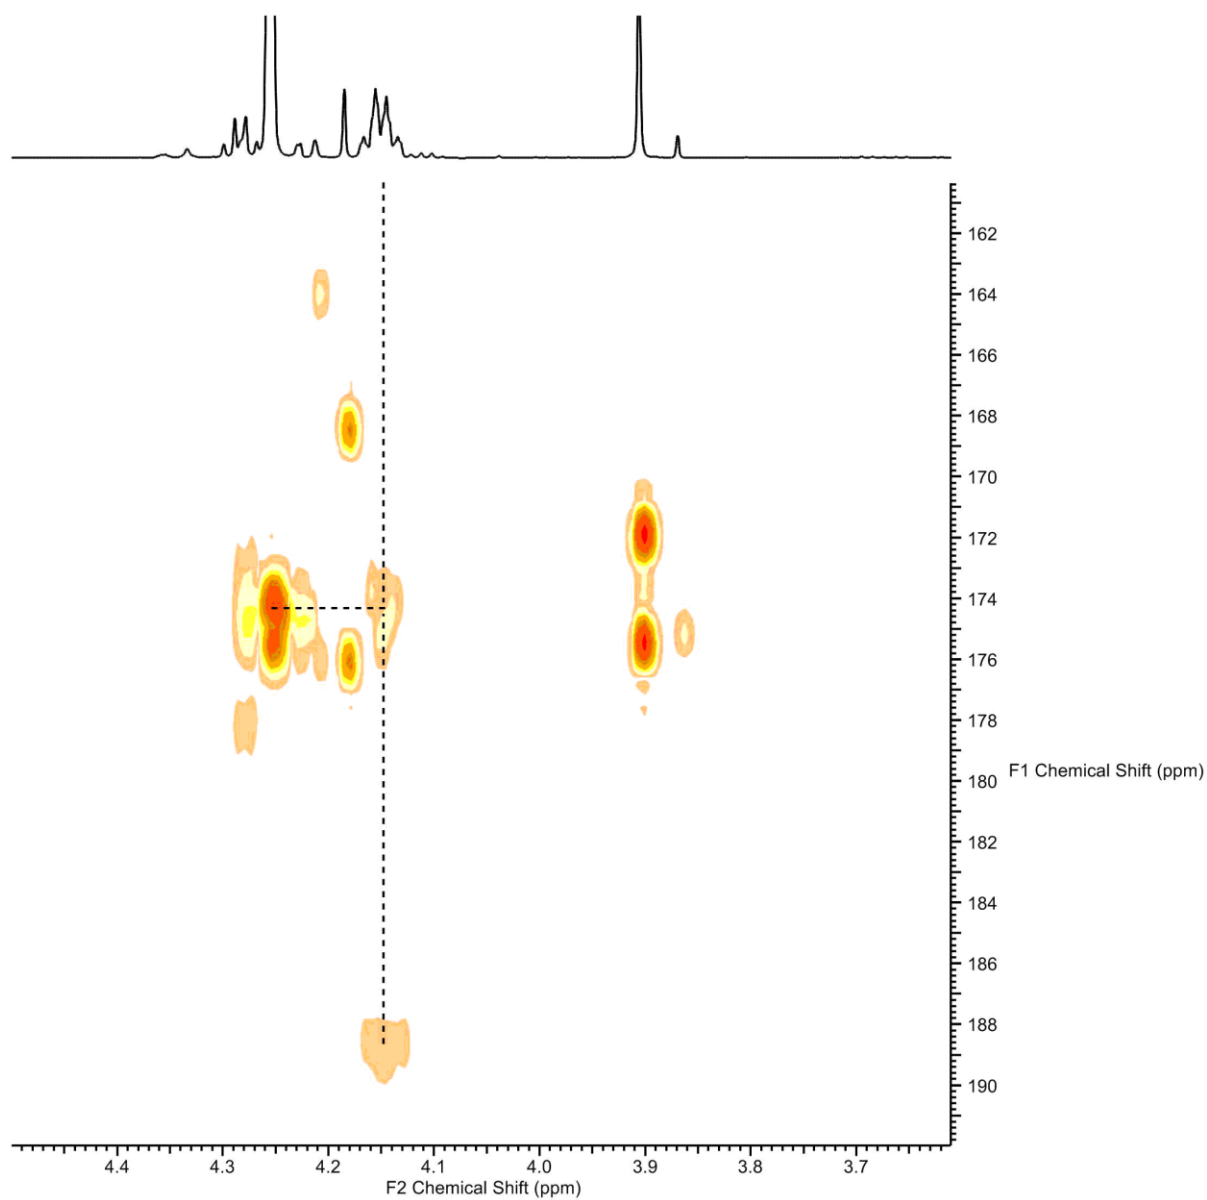

**Figure S55:**  $^1\text{H}$ - $^{13}\text{C}$  HMBC ( $^1\text{H}$ : 700 MHz [3.6-4.5 ppm],  $^{13}\text{C}$ : 176 MHz [160-192 ppm],  $\text{H}_2\text{O}/\text{D}_2\text{O}$  9:1) spectrum for the coupling of **1** and **2A'** catalyzed by 3-mercaptopropionic acid (**6b**) at pH 8.5 after 24 h, showing the diagnostic  $^2\text{J}_{\text{CH}}$  and  $^3\text{J}_{\text{CH}}$  coupling of **Ala- $\alpha$ H** in **4A** at 4.15 ppm with two resonances at 174.5 and 188.7 ppm, which is characteristic of imidazolone formation.

Coupling of *N*-acetylglycine nitrile **1** with *L*-aspartic acid amide **2<sub>D</sub>'** at pH 8.5 and room temperature

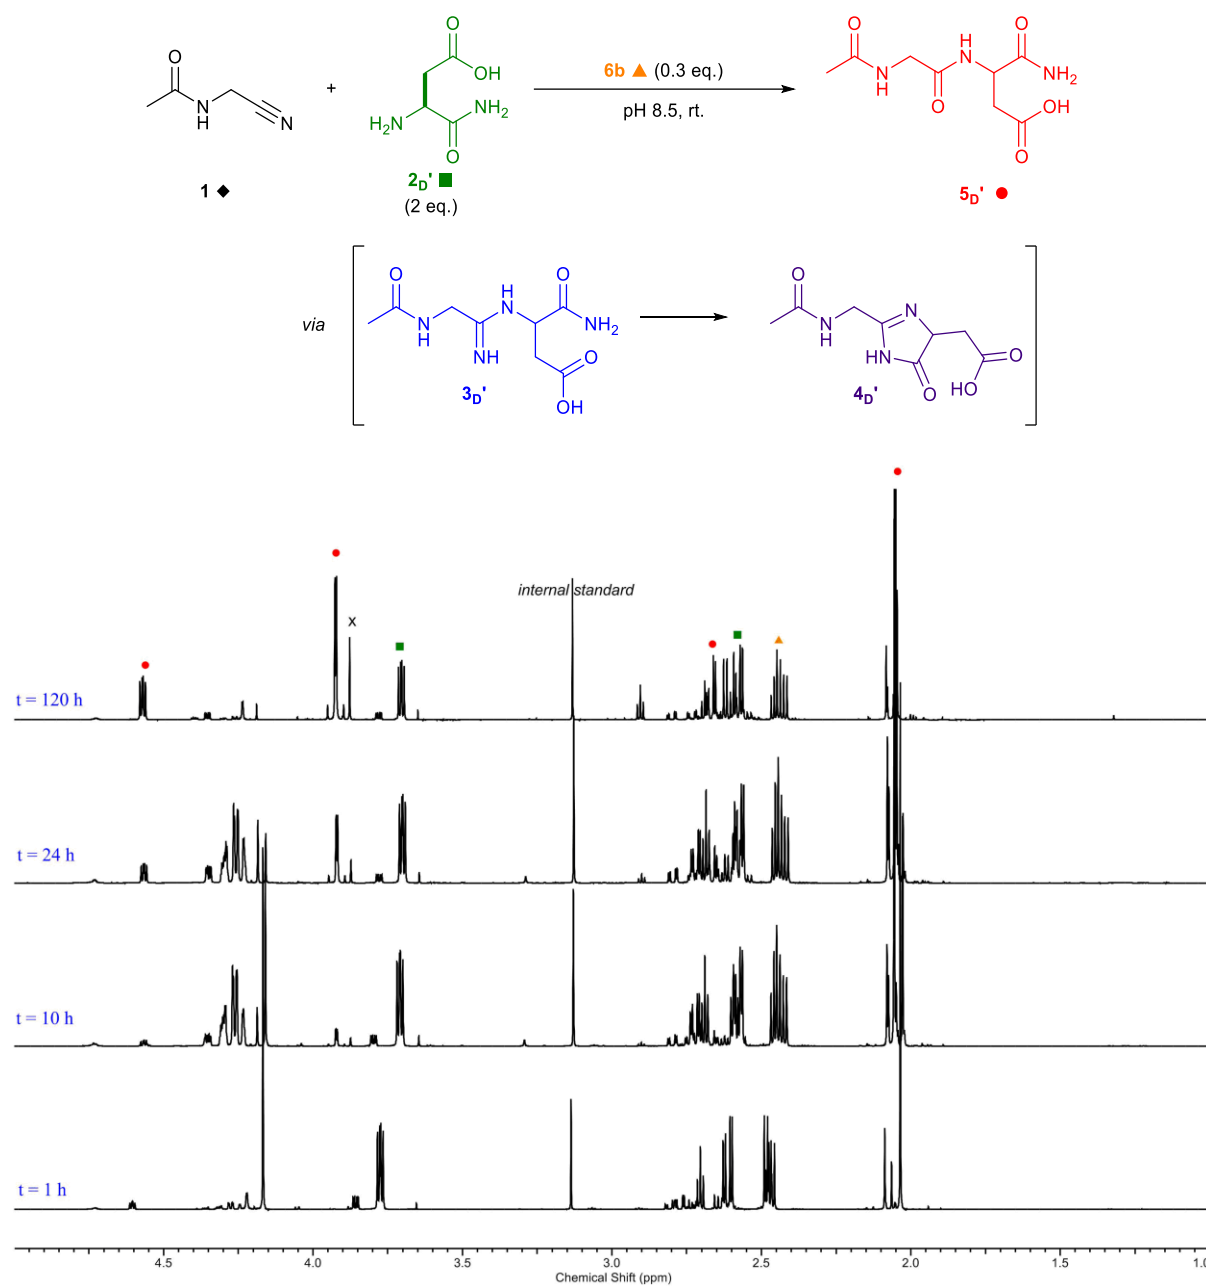

**Figure S56:** <sup>1</sup>H NMR (700 MHz, H<sub>2</sub>O/D<sub>2</sub>O 9:1, noesygppr1d, 1.0-5.0 ppm) spectrum to show the reaction of *N*-acetyl glycine nitrile (**1**, 200 mM) with *L*-aspartic acid amide (**2<sub>D</sub>'**, 260 mM) and 3-mercaptopropanoic acid (**6b**, 60 mM) with MSM (7 mM) as an internal standard after 24 h at pH 8.5 and room temperature.

<sup>1</sup>H NMR (700 MHz, H<sub>2</sub>O/D<sub>2</sub>O 9:1, noesygppr1d) **5<sub>D</sub>'** (●): δ<sub>H</sub> 4.57 (1H, dd, *J* = 7.8, 5.2 Hz, Asp-α*H*-CONH<sub>2</sub>), 3.94 (1H, *J* = 17.1 Hz, AcNHCH*H*), 3.90 (1H, *J* = 17.1 Hz, AcNHCH*H*), 2.67 (ABX, *J* = 15.9, 5.2 Hz, CH(CH*H*COOH)CONH<sub>2</sub>), 2.61 (ABX, *J* = 15.9, 7.8 Hz, CH(CH*H*COOH)CONH<sub>2</sub>), 2.05 (3H, s, *H*<sub>3</sub>C(CO)); *L*-aspartic acid amide, **2<sub>D</sub>'** (■): δ<sub>H</sub> 3.70 (1H, dd, *J* = 8.0, 5.5 Hz, α*H*-COOH), 2.60 (1H, ABX, *J* = 15.8, 5.5 Hz, CH(CH*H*COOH)CONH<sub>2</sub>), 2.46 (1H, ABX, *J* = 15.8, 8.0 Hz, CH(CH*H*COOH)CO NH<sub>2</sub>); *N*-acetylglycinamide, **7** (×): δ<sub>H</sub> 3.90 (2H, s, CH<sub>2</sub>).

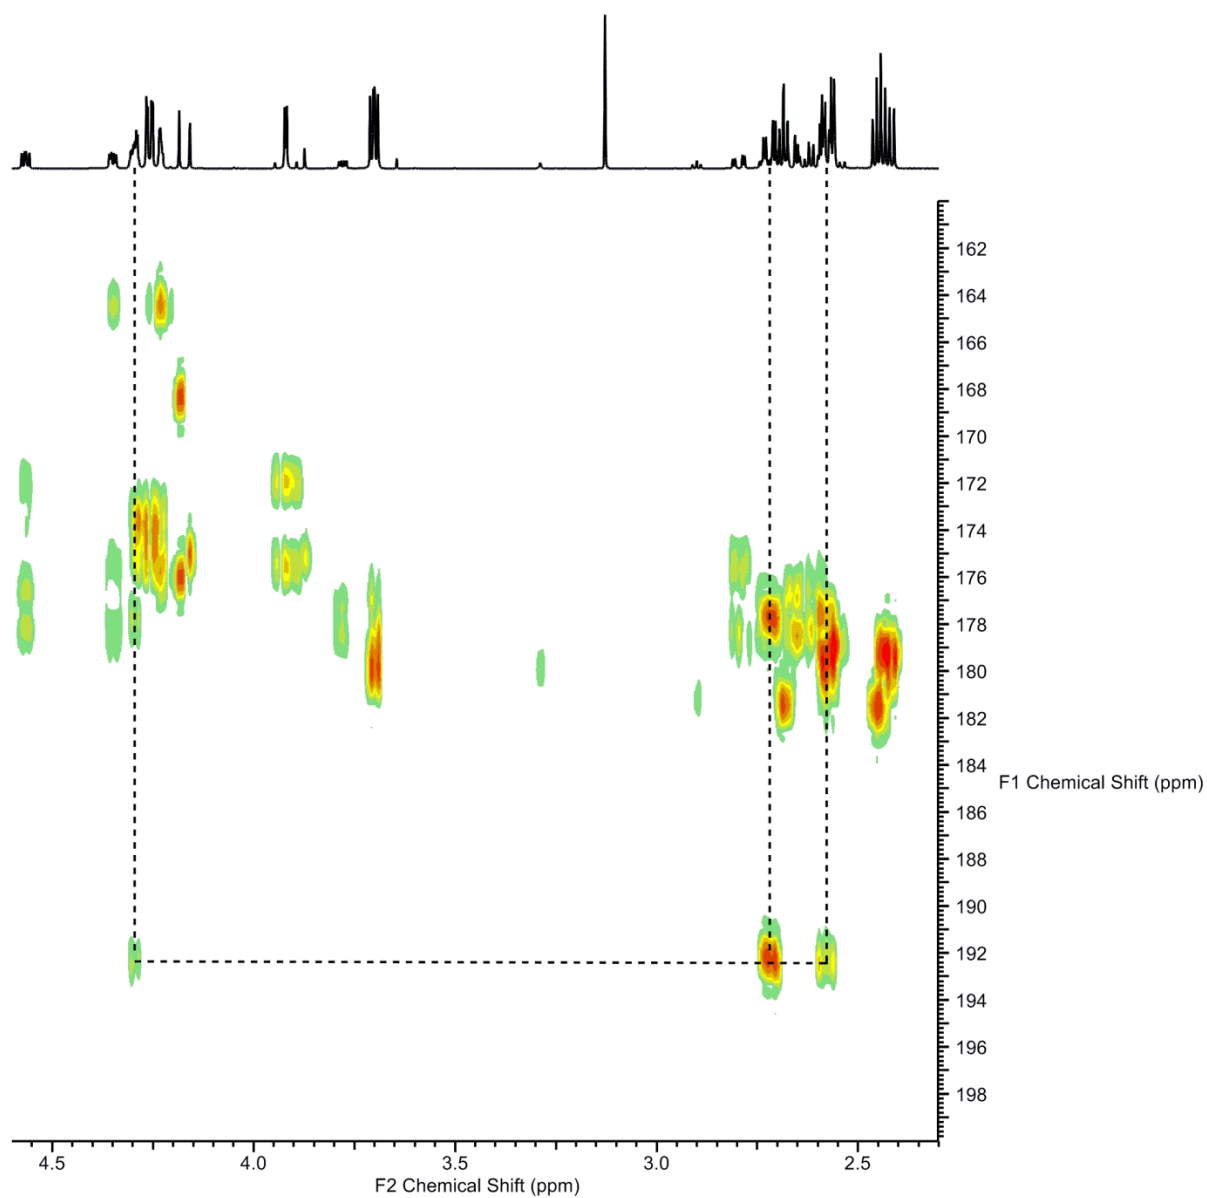

**Figure S57:**  $^1\text{H}$ - $^{13}\text{C}$  HMBC ( $^1\text{H}$ : 700 MHz [2.4-4.5 ppm],  $^{13}\text{C}$ : 176 MHz [160-200 ppm],  $\text{H}_2\text{O}/\text{D}_2\text{O}$  9:1) spectrum for the coupling of **1** and **2b'** catalyzed by 3-mercaptopropionic acid (**6b**) at pH 8.5 after 24 h, showing the diagnostic coupling of the imidazolone amide signal in **4b** at 192.2 ppm with signals at 4.30 ppm (**Asp**- $\alpha\text{H}$ ,  $^3J_{\text{CH}}$ ), 2.72 and 2.58 ppm (**Asp**- $\beta\text{H}$ ,  $^3J_{\text{CH}}$ ), which is characteristic of imidazolone formation.

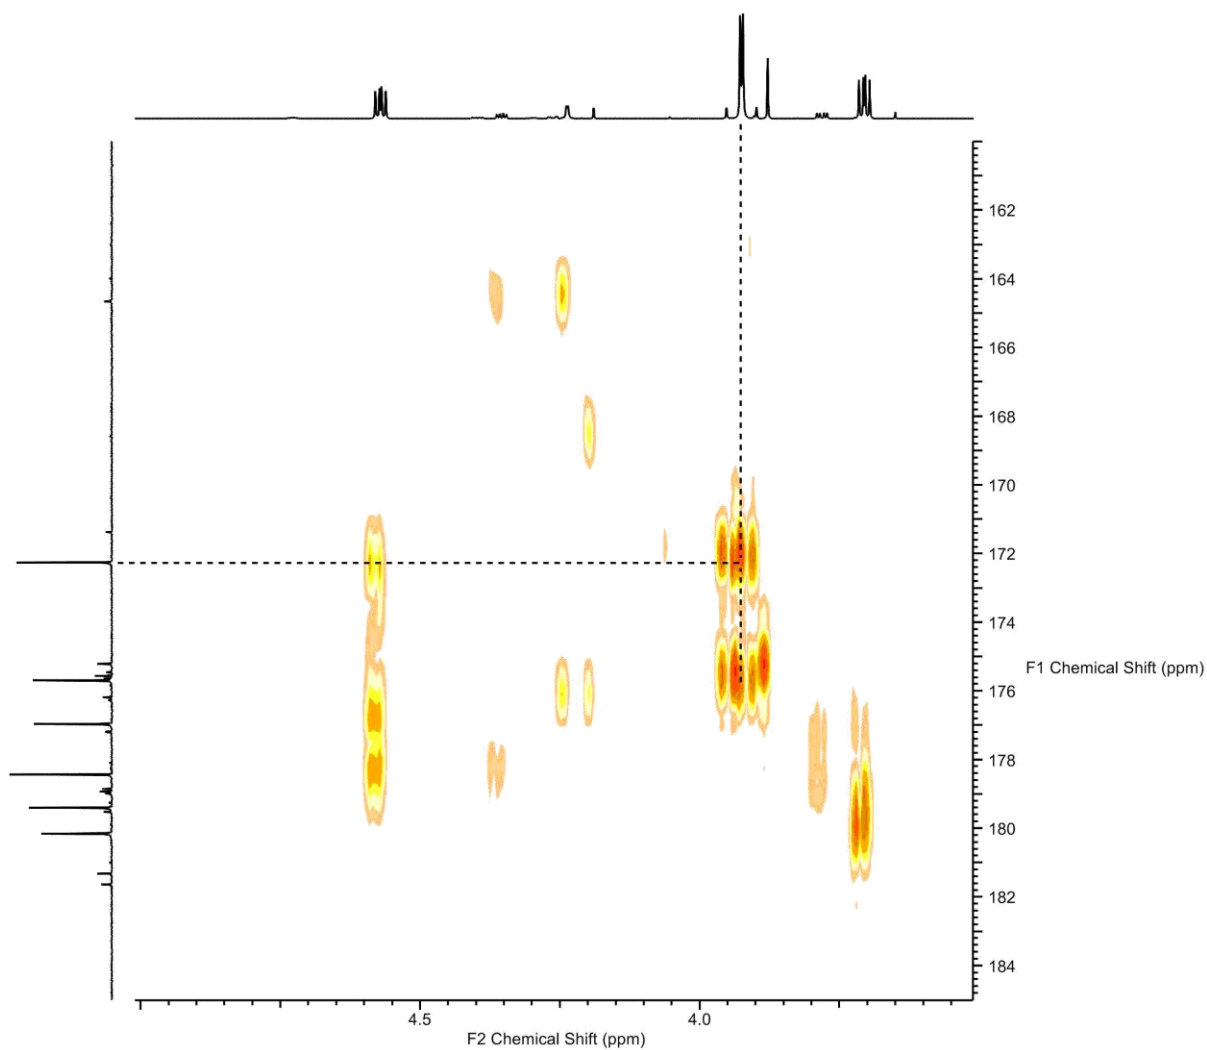

**Figure S58:**  $^1\text{H}$ - $^{13}\text{C}$  HMBC ( $^1\text{H}$ : 700 MHz [3.5-5.0 ppm],  $^{13}\text{C}$ : 176 MHz [160-185 ppm],  $\text{H}_2\text{O}/\text{D}_2\text{O}$  9:1) spectrum showing the diagnostic  $^2\text{J}_{\text{CH}}$  and  $^3\text{J}_{\text{CH}}$  coupling of the Asp- $\alpha\text{H}$ -CONH $_2$  in **5b** at 4.57 ppm with three resonances at 178.4, 177.0 and 172.3 ppm, characteristic of peptide formation.

Coupling of *N*-acetylglycine nitrile **1** with *L*-arginine amide **2<sub>R</sub>'** at pH 8.5 and room temperature

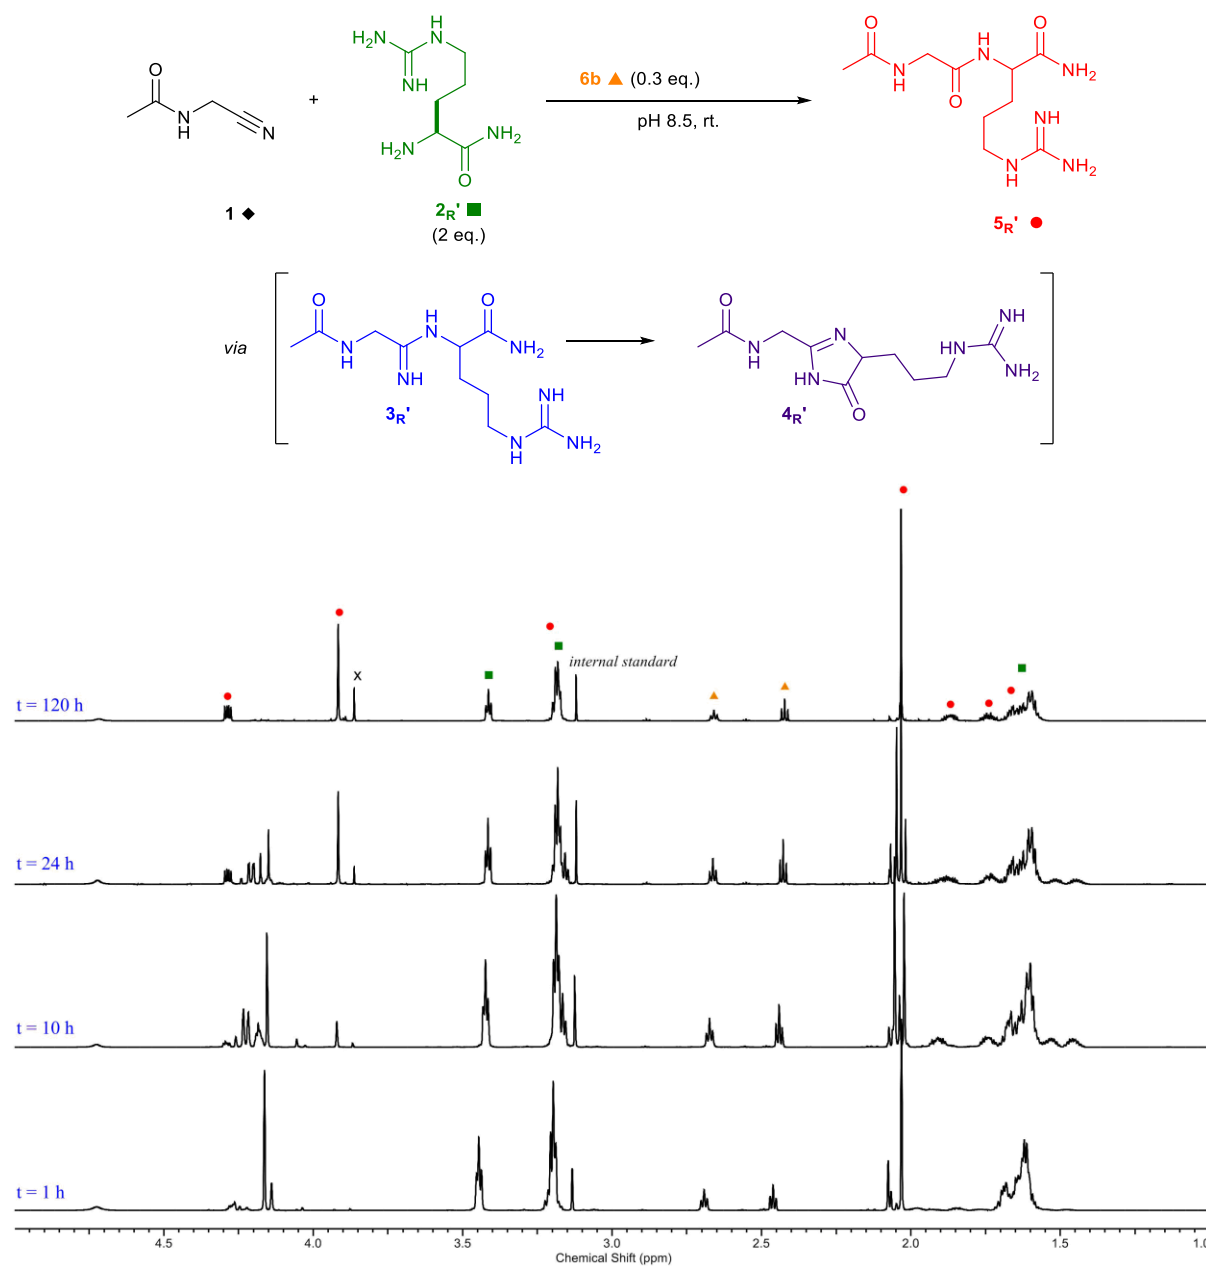

**Figure S59:** <sup>1</sup>H NMR (700 MHz, H<sub>2</sub>O/D<sub>2</sub>O 9:1, noesygppr1d, 1.0-5.0 ppm) spectrum to show the reaction of *N*-acetyl glycine nitrile (**1**, 200 mM) with *L*-arginine amide (**2<sub>R</sub>'**, 400 mM) 3-mercaptopropanoic acid (**6b**, 60 mM) with MSM (30 mM) as an internal standard at pH 8.5 and room temperature. **x** = *N*-acetylglycinamide, **7**.

<sup>1</sup>H NMR (700 MHz, H<sub>2</sub>O/D<sub>2</sub>O 9:1, noesygppr1d) (*2*-acetamido-1-iminoethyl)arginine, **5<sub>R</sub>'** (●): δ<sub>H</sub> 4.32 (1H, dd, *J* = 9.3, 5.1 Hz, Arg- $\alpha$ H-COOH), 3.95 (1H, app. s AcNHCH<sub>2</sub>), 3.22 (overlapped, CH<sub>2</sub>(guanidyl)), 2.07 (3H, s, H<sub>3</sub>C(CO)), 1.90 (1H, m, CHHCH<sub>2</sub>CH<sub>2</sub>(guanidyl)), 1.77 (1H, m, CHHCH<sub>2</sub>CH<sub>2</sub>(guanidyl)), 1.57 (overlap, CH<sub>2</sub>CH<sub>2</sub>CH<sub>2</sub>(guanidyl)); *L*-arginine amide, **2<sub>R</sub>'** (■) (partial assignment): δ<sub>H</sub> 3.45 (1H, t, *J* = 6.1 Hz,  $\alpha$ H-COOH), 3.22 (overlap CH<sub>2</sub>(guanidyl)); *N*-Acetylglycinamide, **7** (x) (partial assignment): δ<sub>H</sub> 3.90 (2H, s, CH<sub>2</sub>).

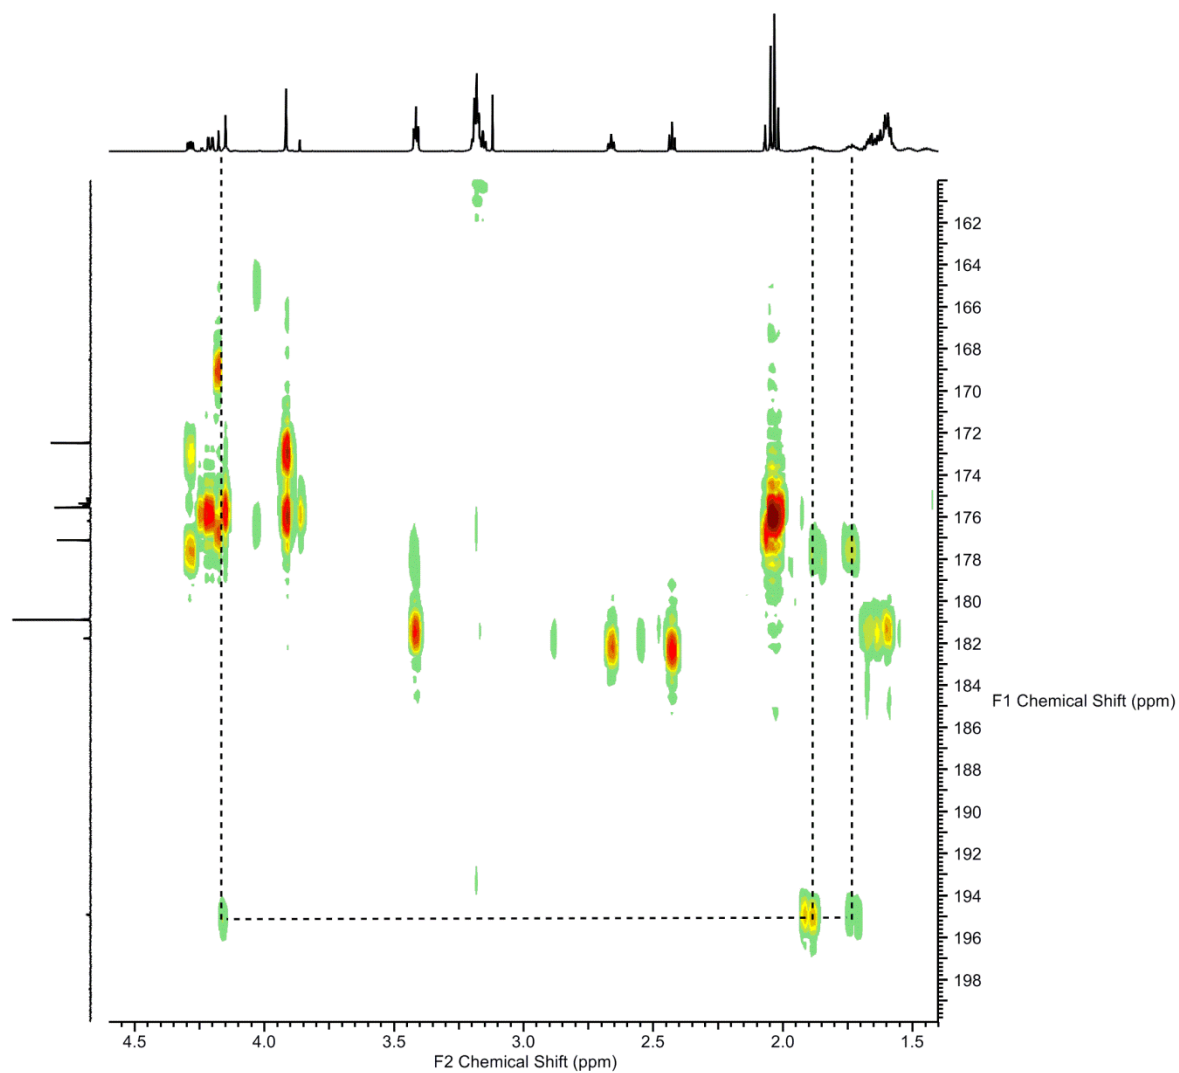

**Figure S60:**  $^1\text{H}$ - $^{13}\text{C}$  HMBC ( $^1\text{H}$ : 700 MHz [1.4-4.6 ppm],  $^{13}\text{C}$ : 176 MHz [160-200 ppm],  $\text{H}_2\text{O}/\text{D}_2\text{O}$  9:1) spectrum for the coupling of **1** and **2R'** catalyzed by 3-mercaptopropionic acid (**6b**) at pH 8.5 after 24 h, showing the diagnostic coupling of the imidazolone amide signal in **4R** at 194.8 ppm with signals at 4.17 ppm (**Arg**- $\alpha\text{H}$ ,  $^2\text{J}_{\text{CH}}$ ), 1.90 and 1.72 ppm (**Arg**- $\beta\text{H}$ ,  $^3\text{J}_{\text{CH}}$ ), which is characteristic of imidazolone formation.

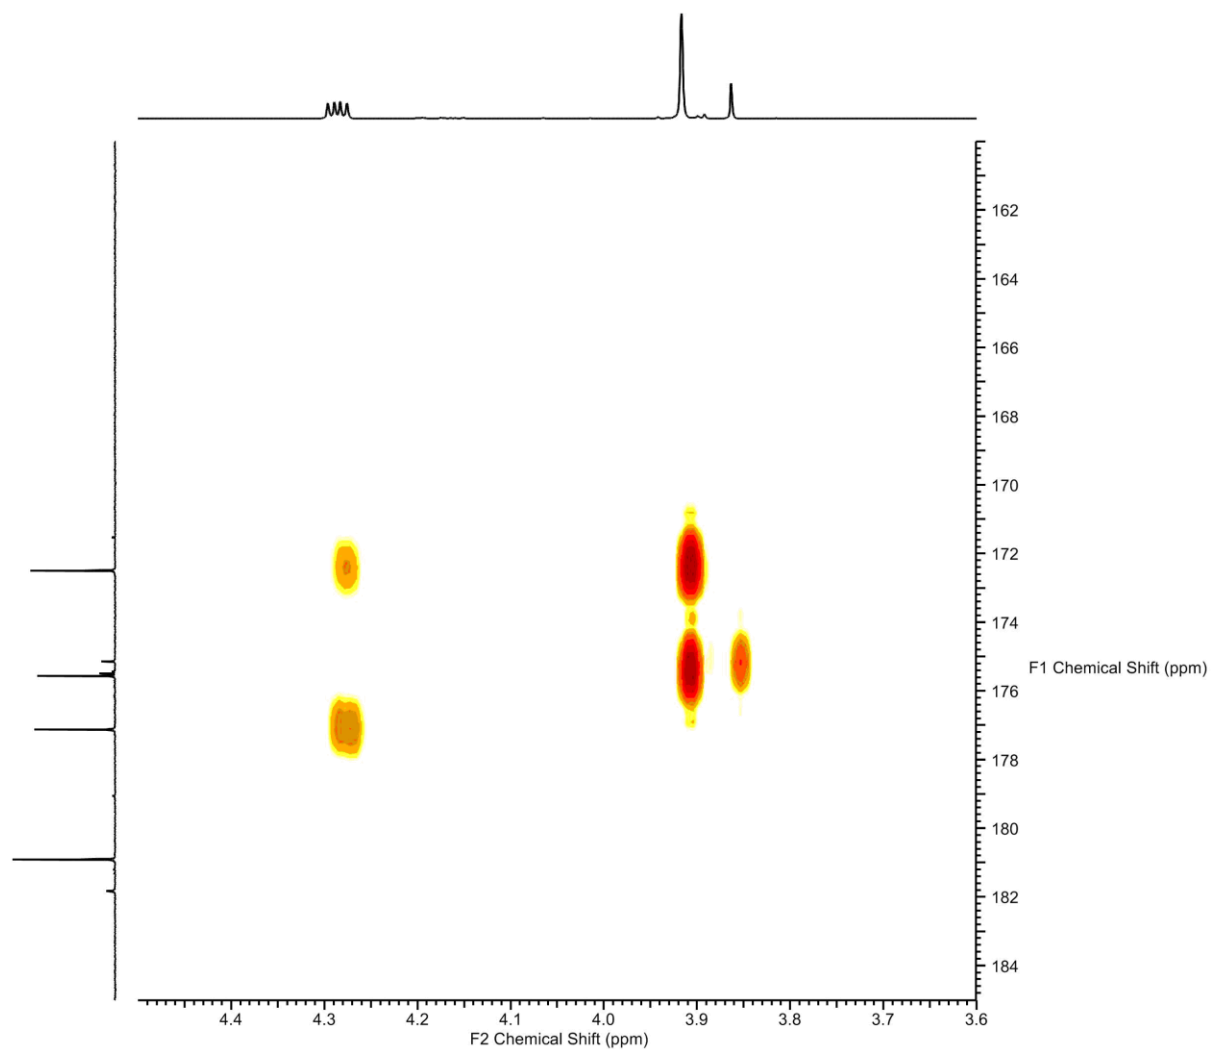

**Figure S61:**  $^1\text{H}$ - $^{13}\text{C}$  HMBC ( $^1\text{H}$ : 700 MHz [3.6-4.5 ppm],  $^{13}\text{C}$ : 176 MHz [160-185 ppm],  $\text{H}_2\text{O}/\text{D}_2\text{O}$  9:1) spectrum showing the diagnostic  $^2\text{J}_{\text{CH}}$  and  $^3\text{J}_{\text{CH}}$  coupling of Arg- $\alpha\text{H}$  in **5r'** at 4.32 ppm with two resonances at 177.1 and 172.5 ppm.



Coupling of *N*-acetylglycine nitrile **1** with *L*-asparagine amide **2N'** at pH 8.5 and room temperature

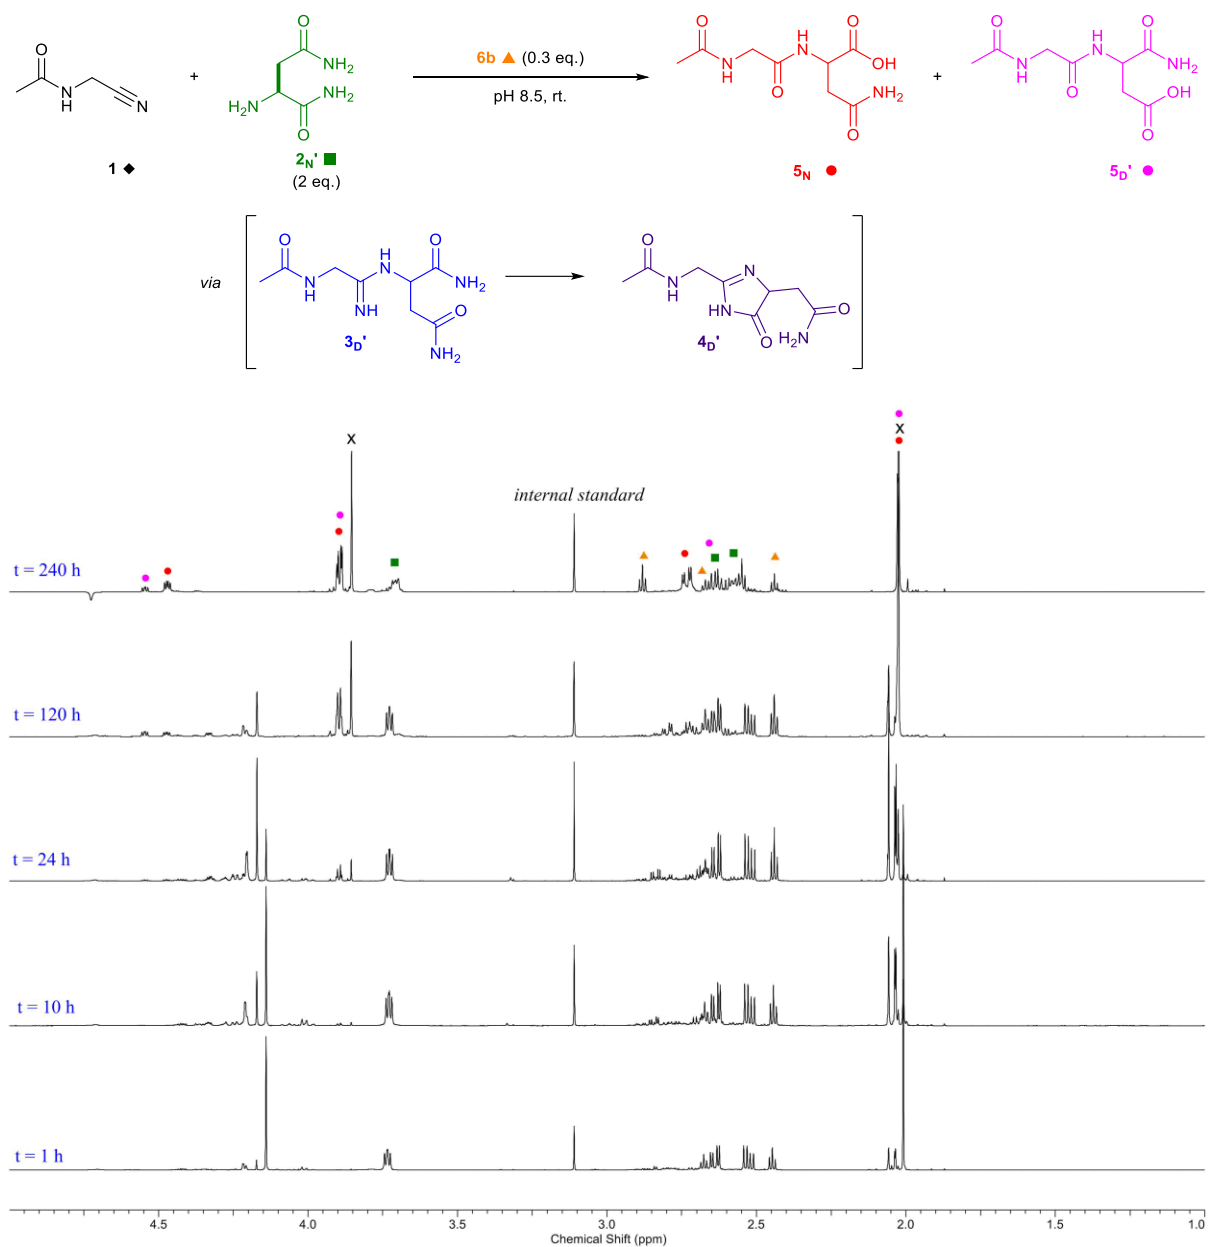

**Figure S62:** <sup>1</sup>H NMR (700 MHz, H<sub>2</sub>O/D<sub>2</sub>O 9:1, noesygppr1d, 1.0–5.0 ppm) spectrum to show the reaction of *N*-acetyl glycine nitrile (**1**, 200 mM) with *L*-asparagine amide (**2N'**, 400 mM) and 3-mercaptopropanoic acid (**6b**, 60 mM) with MSM (7 mM) as an internal standard at pH 8.5 and room temperature. **X** = *N*-acetyl glycinamide **7**

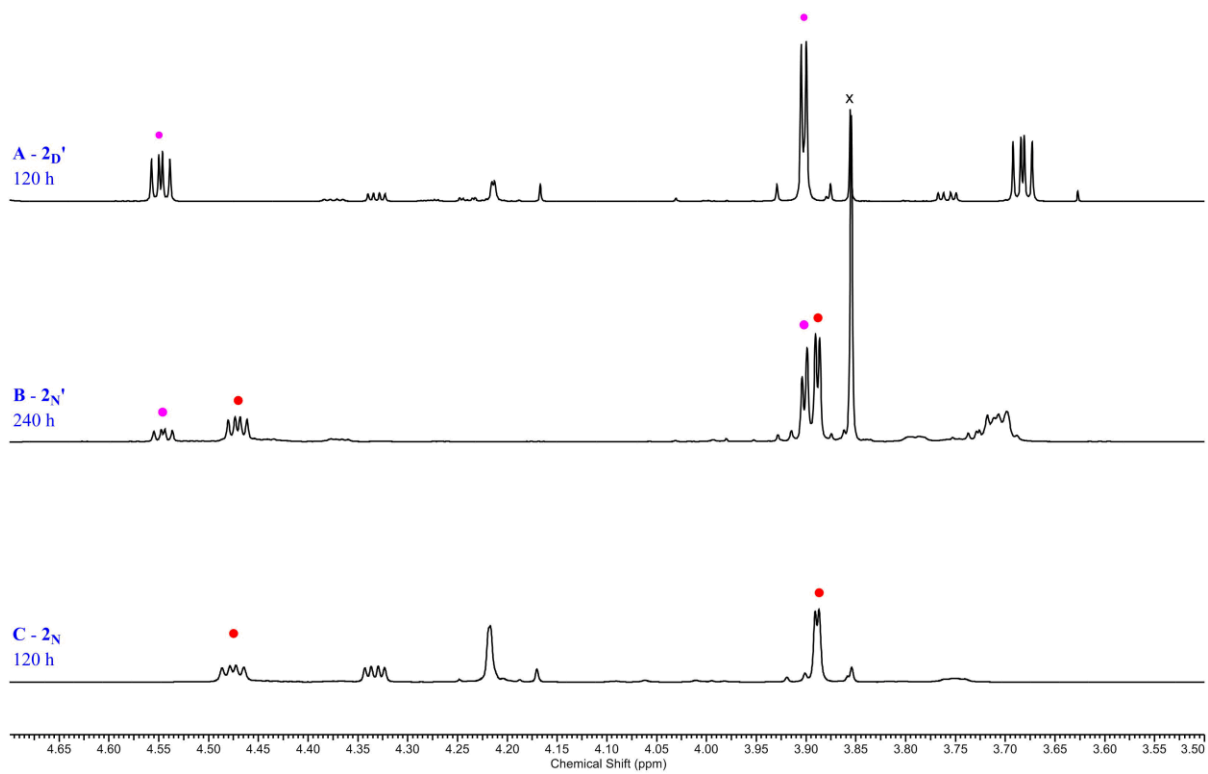

**Figure S63:**  $^1\text{H}$  NMR (700 MHz,  $\text{H}_2\text{O}/\text{D}_2\text{O}$  9:1, noesygppr1d, 3.5–4.7 ppm) spectrum to show the reaction of *N*-acetyl glycine nitrile (**1**, 200 mM) at pH 8.5 and room temperature with 3-mercaptopropanoic acid (**6b**, 60 mM) and **A** L-asparagine (**2<sub>N</sub>**, 240 mM, 120 h), **B** L-asparagine amide (**2<sub>N'</sub>**, 400 mM, 240 h) or **C** L-aspartic acid amide (**2<sub>D'</sub>**, 400 mM, 120 h).

For characterisation see entries for **2<sub>N</sub>** (p 33) and **2<sub>D'</sub>** (p 66).

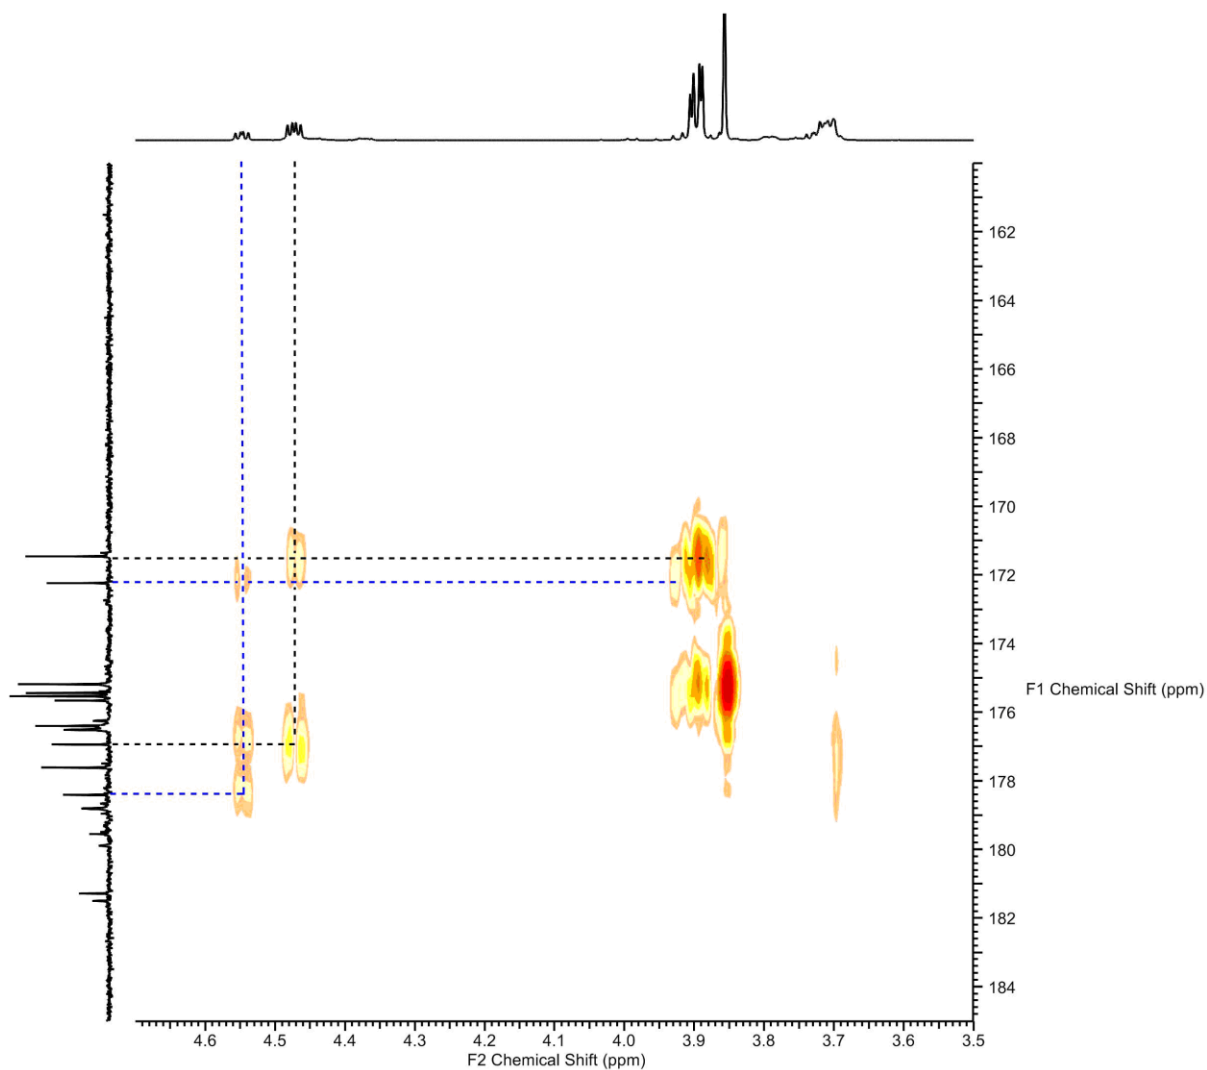

**Figure S64:**  $^1\text{H}$ - $^{13}\text{C}$  HMBC ( $^1\text{H}$ : 700 MHz [3.5-4.7 ppm],  $^{13}\text{C}$ : 176 MHz [160-185 ppm],  $\text{H}_2\text{O}/\text{D}_2\text{O}$  9:1) spectrum showing the diagnostic  $^2J_{\text{CH}}$  and  $^3J_{\text{CH}}$  coupling of the Asn- $\alpha\text{H}$ -COOH in **5N** at 4.54 ppm with three resonances at 178.4, 176.9 and 172.2 ppm, which is characteristic of peptide bond formation of Asn, and the  $^2J_{\text{CH}}$  and  $^3J_{\text{CH}}$  coupling of Asp- $\alpha\text{H}$ -CONH<sub>2</sub> in **5D** at 4.46 ppm with two resonances at 176.9 and 171.5 ppm, which is characteristic of peptide bond formation of Asp.

Coupling of *N*-acetylglycine nitrile **1** with *L*-glutamic acid amide **2E'** at pH 8.5 and room temperature

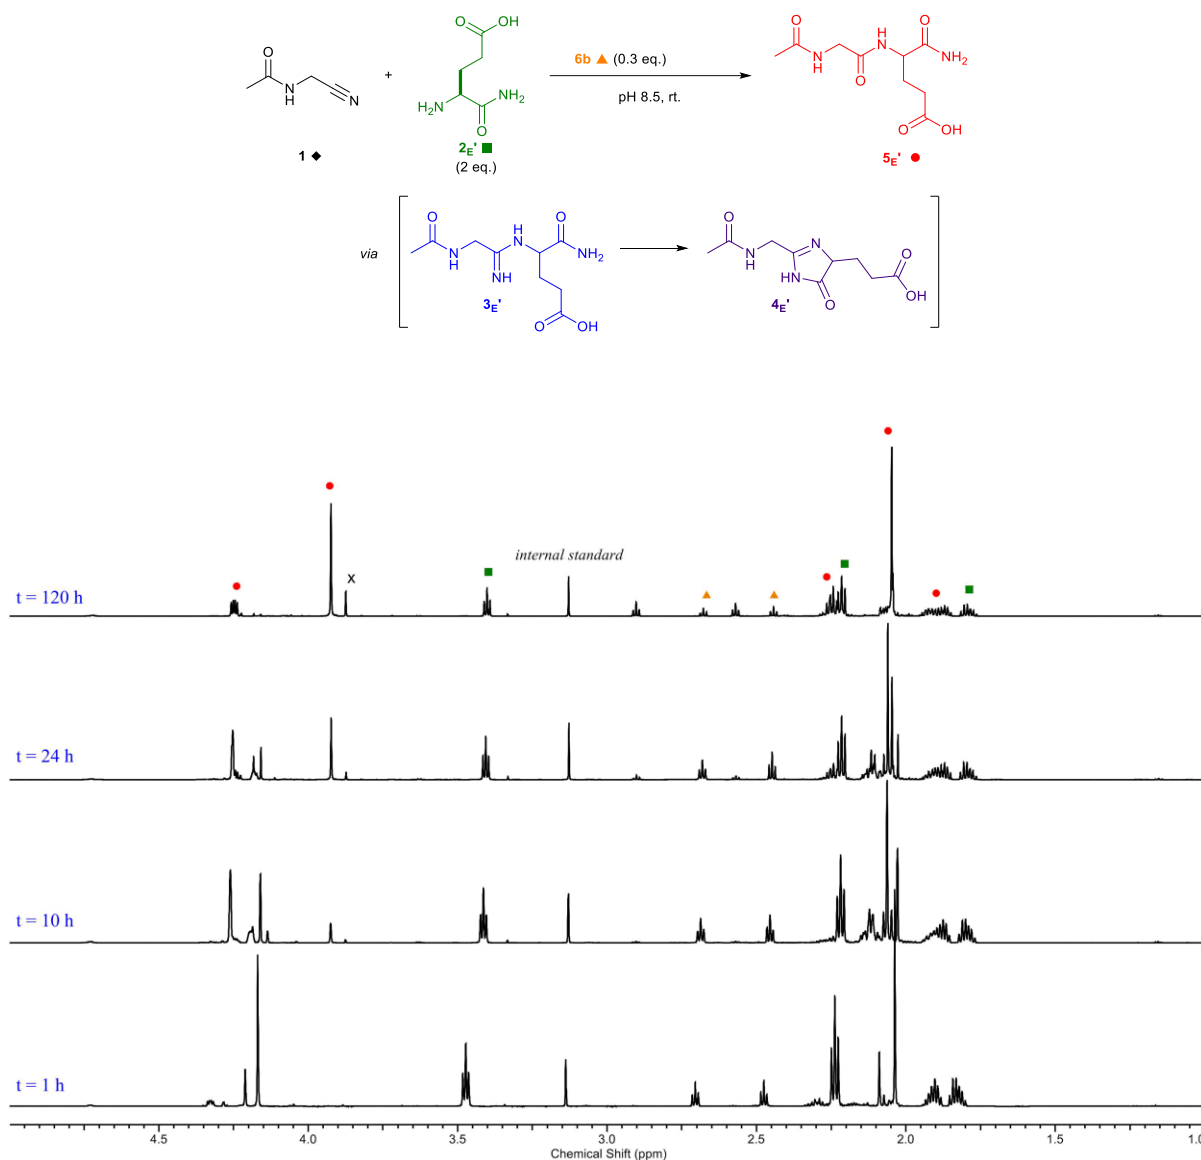

**Figure S65:**  $^1\text{H}$  NMR (700 MHz,  $\text{H}_2\text{O}/\text{D}_2\text{O}$  9:1 noesygppr1d, 1.0–5.0 ppm) spectrum to show the reaction of *N*-acetyl glycine nitrile (**1**, 200 mM) with *L*-glutamic acid amide (**2E'**, 220 mM) and 3-mercaptopropanoic acid (**6b**, 60 mM) with MSM (7 mM) as an internal standard at pH 8.5 and room temperature. ✕ = *N*-Acetyl glycinamide **7**

$^1\text{H}$  NMR (700 MHz,  $\text{H}_2\text{O}/\text{D}_2\text{O}$  9:1) **5E'** (●):  $\delta_{\text{H}}$  4.27 (1H, dd,  $J = 9.2, 4.9$  Hz, Glu- $\alpha\text{H}$ -CONH<sub>2</sub>), 3.95 (2H, s, AcNHCH<sub>2</sub>), 2.29–2.23 (m, CH<sub>2</sub>CH<sub>2</sub>COOH), 2.08 (3H, s, H<sub>3</sub>C(CO)), 2.10–2.06 (m, CHHCH<sub>2</sub>COOH), 1.98–1.91 (m, CHHCH<sub>2</sub>COOH); *L*-glutamic acid amide, **2E'** (■):  $\delta_{\text{H}}$  3.43 (1H, t,  $J = 6.72$  Hz,  $\alpha\text{H}$ -CONH<sub>2</sub>), 2.24 (2H, t,  $J = 8.0$  Hz, CH<sub>2</sub>CH<sub>2</sub>COOH), 1.93–1.88 (m, CHHCH<sub>2</sub>COOH), 1.84–1.79 (1H, m, CHHCH<sub>2</sub>COOH); *N*-acetylglycinamide, **7** (✕) (partial assignment):  $\delta_{\text{H}}$  3.90 (2H, s, CH<sub>2</sub>).

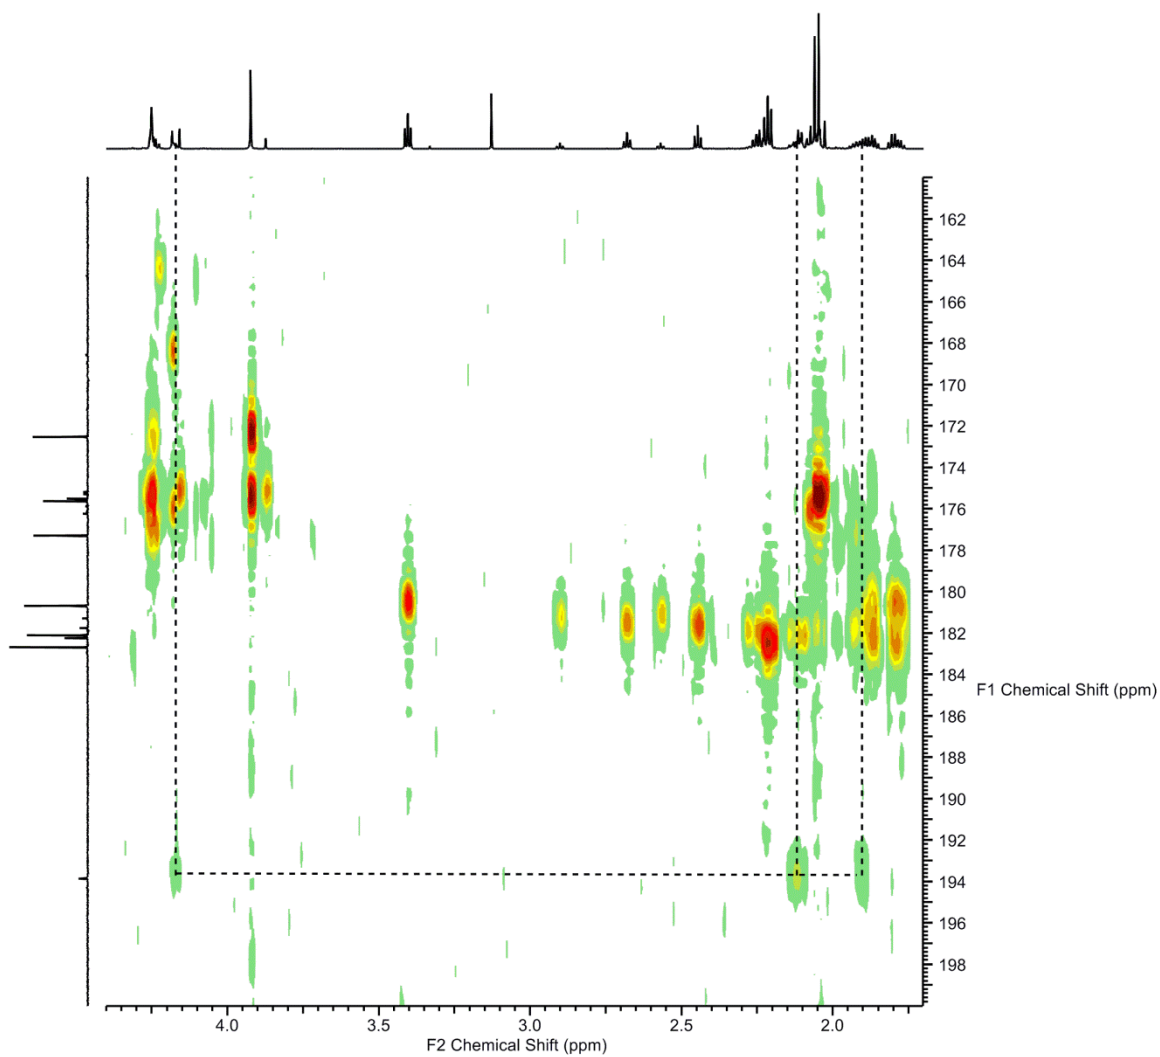

**Figure S66:**  $^1\text{H}$ - $^{13}\text{C}$  HMBC ( $^1\text{H}$ : 700 MHz [1.7-4.4 ppm],  $^{13}\text{C}$ : 176 MHz [160-200 ppm],  $\text{H}_2\text{O}/\text{D}_2\text{O}$  9:1) spectrum for the coupling of **1** and **2E'** catalyzed by 3-mercaptopropionic acid (**6b**) at pH 8.5 after 48 h, showing the diagnostic coupling of the imidazolone amide signal in **4E** at 193.8 ppm with signals at 4.17 ppm (**Glu- $\alpha$ H**,  $^2\text{J}_{\text{CH}}$ ), 2.12 and 1.90 ppm (**Glu- $\beta$ H**,  $^3\text{J}_{\text{CH}}$ ), which is characteristic of imidazolone formation.

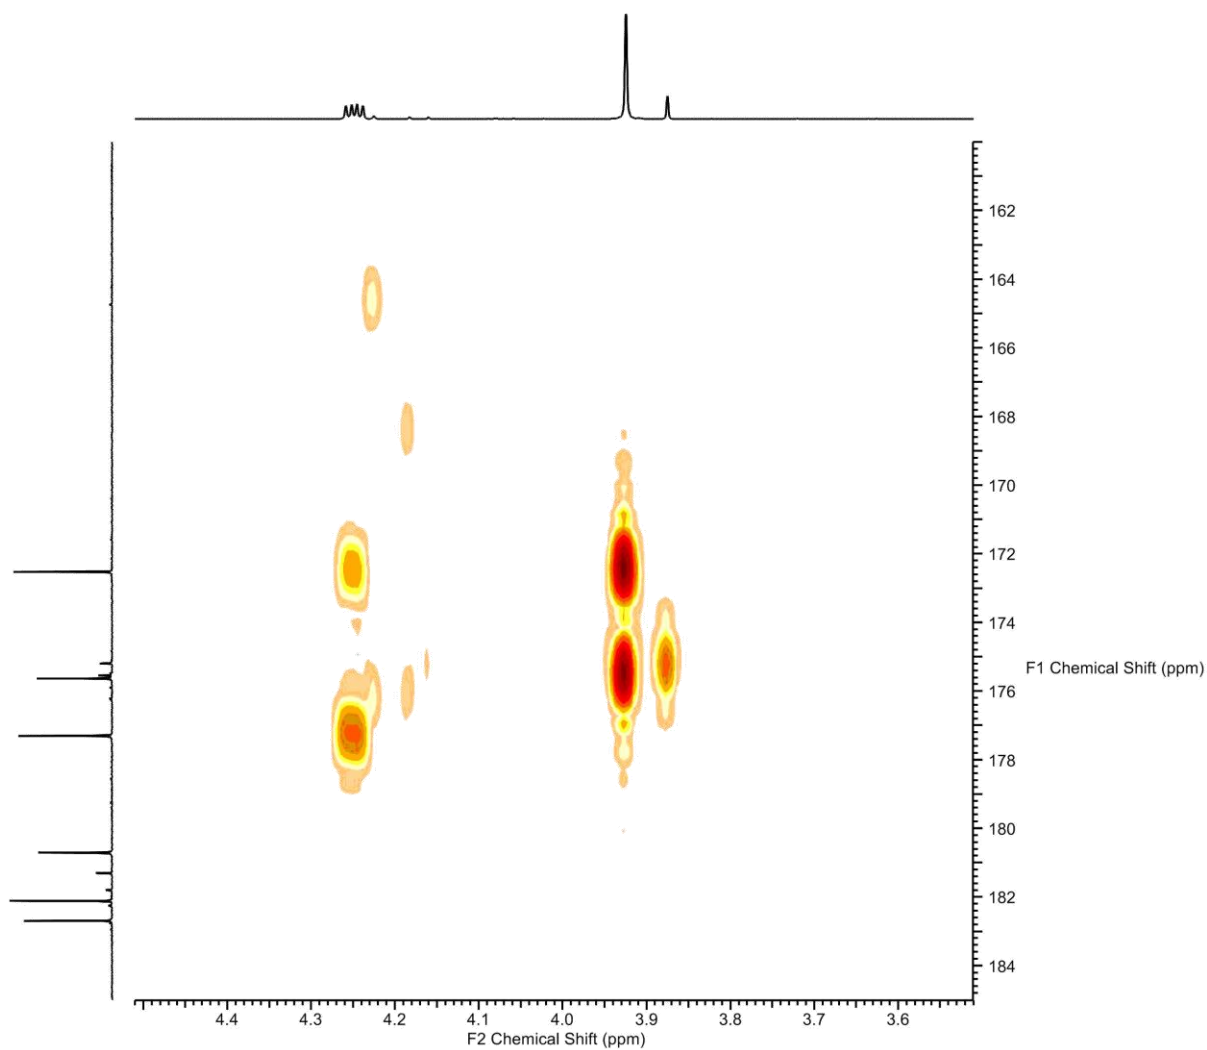

**Figure S67:**  $^1\text{H}$ - $^{13}\text{C}$  HMBC ( $^1\text{H}$ : 700 MHz [3.5-4.5 ppm],  $^{13}\text{C}$ : 176 MHz [150-185 ppm],  $\text{H}_2\text{O}/\text{D}_2\text{O}$  9:1) spectrum showing the diagnostic  $^2\text{J}_{\text{CH}}$  and  $^3\text{J}_{\text{CH}}$  coupling of the Glu- $\alpha\text{H}$  in  $5\text{E}'$  at 4.27 ppm with two resonances at 177.2 and 172.5 ppm.

Coupling of *N*-acetylglycine nitrile **1** with *L*-glutamine amide **2Q'** at pH 8.5 and room temperature

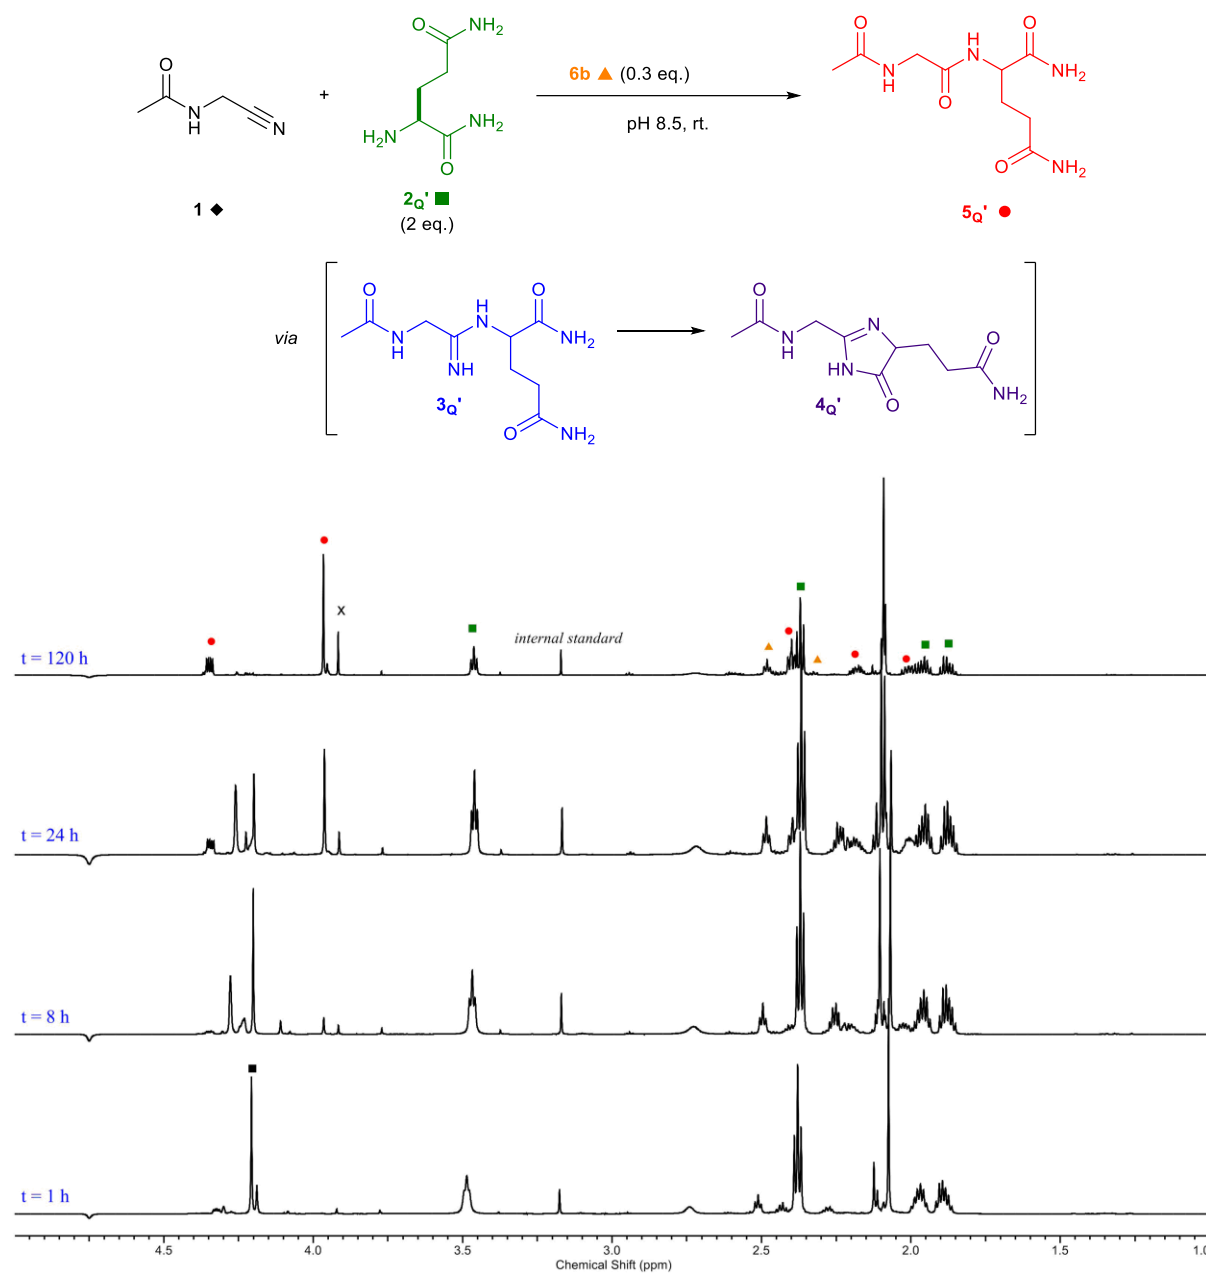

**Figure S68:** <sup>1</sup>H NMR (700 MHz, H<sub>2</sub>O/D<sub>2</sub>O 9:1, noesygppr1d, 1.0-5.0 ppm) spectrum to show the reaction of *N*-acetyl glycine nitrile (**1**, 200 mM) with *L*-glutamine amide (**2Q'**, 400 mM) and 3-mercaptopropanoic acid (**6b**, 60 mM) with MSM (7 mM) as an internal standard at pH 8.5 and room temperature, ✕ = 7.

<sup>1</sup>H NMR (700 MHz, H<sub>2</sub>O/D<sub>2</sub>O 9:1, noesygppr1d) **5Q'** (●): δ<sub>H</sub> 4.35 (1H, dd, *J* = 9.7, 4.7 Hz Gln-αH-COOH), 3.97 (2H, s, AcNHCH<sub>2</sub>), 2.40 (2H, app. td, 7.4, 2.1 Hz CH<sub>2</sub>CH<sub>2</sub>CONH<sub>2</sub>), 2.21 - 2.15 (1H, m, CHHCH<sub>2</sub>CONH<sub>2</sub>), 2.09 (3H, s, H<sub>3</sub>C(CO)), 2.03 - 1.97 (1H, m, CHHCH<sub>2</sub>CONH<sub>2</sub>); *L*-glutamine amide, **2Q'** (■): δ<sub>H</sub> 3.46 (1H, t, *J* = 6.6 Hz, αH-COOH), 2.37 (2H, app t, *J* = 7.9 Hz, CH<sub>2</sub>CH<sub>2</sub>CONH<sub>2</sub>), 1.99 - 1.93 (1H, m, CHHCH<sub>2</sub>CONH<sub>2</sub>), 1.90 - 1.83 (1H, m, CHHCH<sub>2</sub>CONH<sub>2</sub>); *N*-acetylglycinamide, **7** (✕) (partial assignment): δ<sub>H</sub> 3.92 (2H, s, CH<sub>2</sub>).

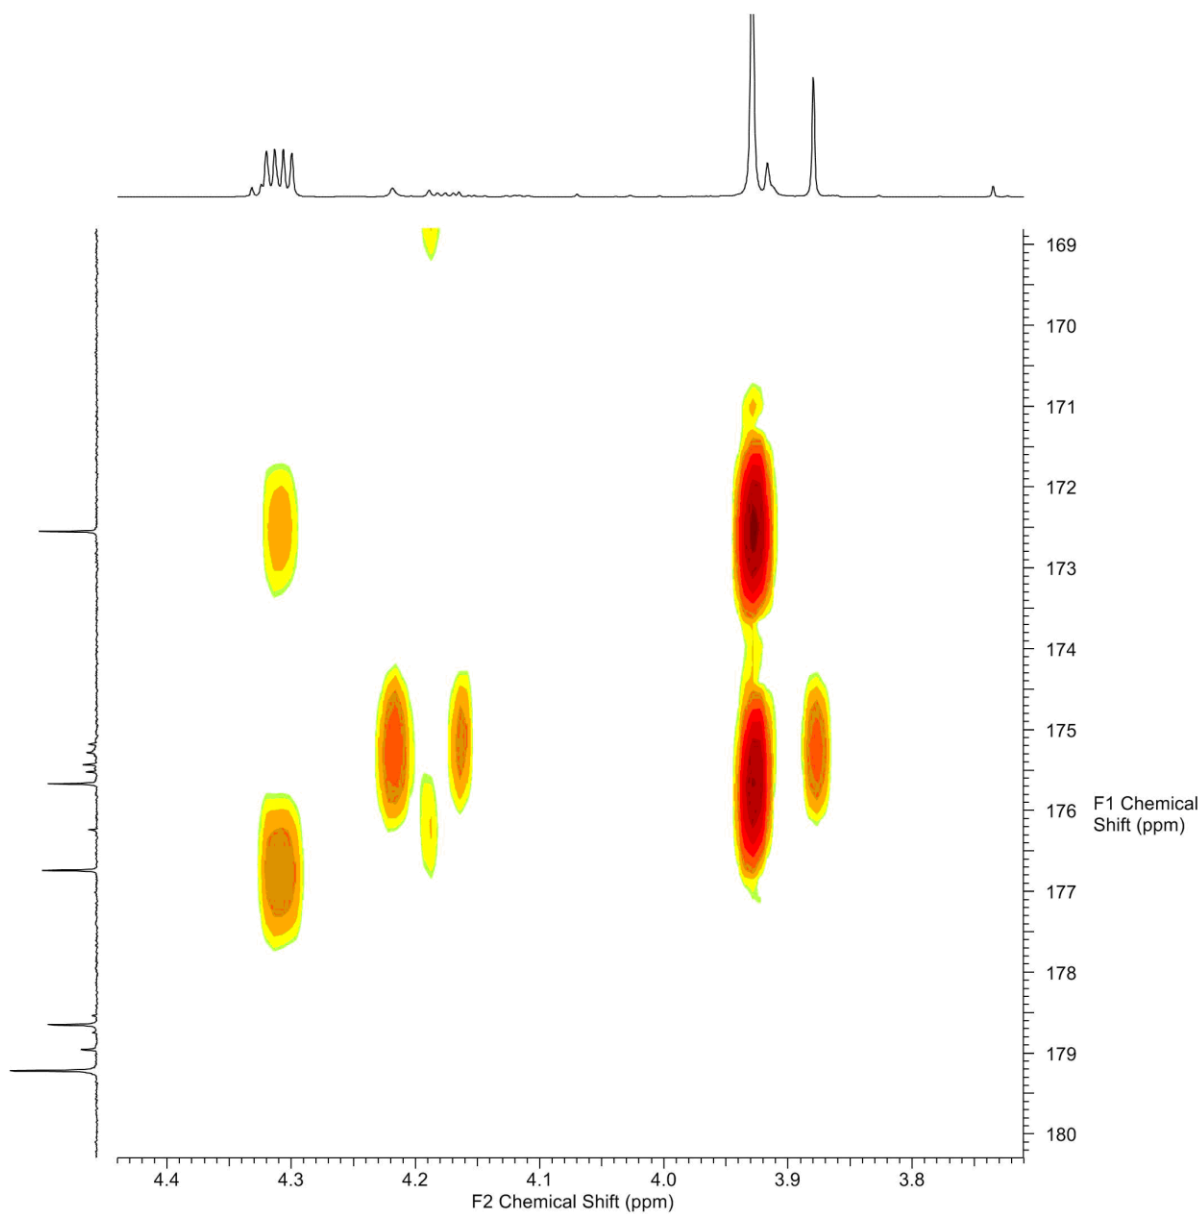

**Figure S69:** <sup>1</sup>H-<sup>13</sup>C HMBC (<sup>1</sup>H: 700 MHz [3.7-4.5 ppm], <sup>13</sup>C: 176 MHz [169-181 ppm], H<sub>2</sub>O/D<sub>2</sub>O 9:1) spectrum showing the diagnostic <sup>2</sup>J<sub>CH</sub> and <sup>3</sup>J<sub>CH</sub> coupling of the **Gln-αH** in **5q'** at 4.31 ppm with two resonances at 176.8 and 172.4 ppm, which is characteristic of amide bond formation of **Gln**.



Coupling of N-acetylglycine nitrile **1** with glycineamide **2G'** at pH 8.5 and room temperature

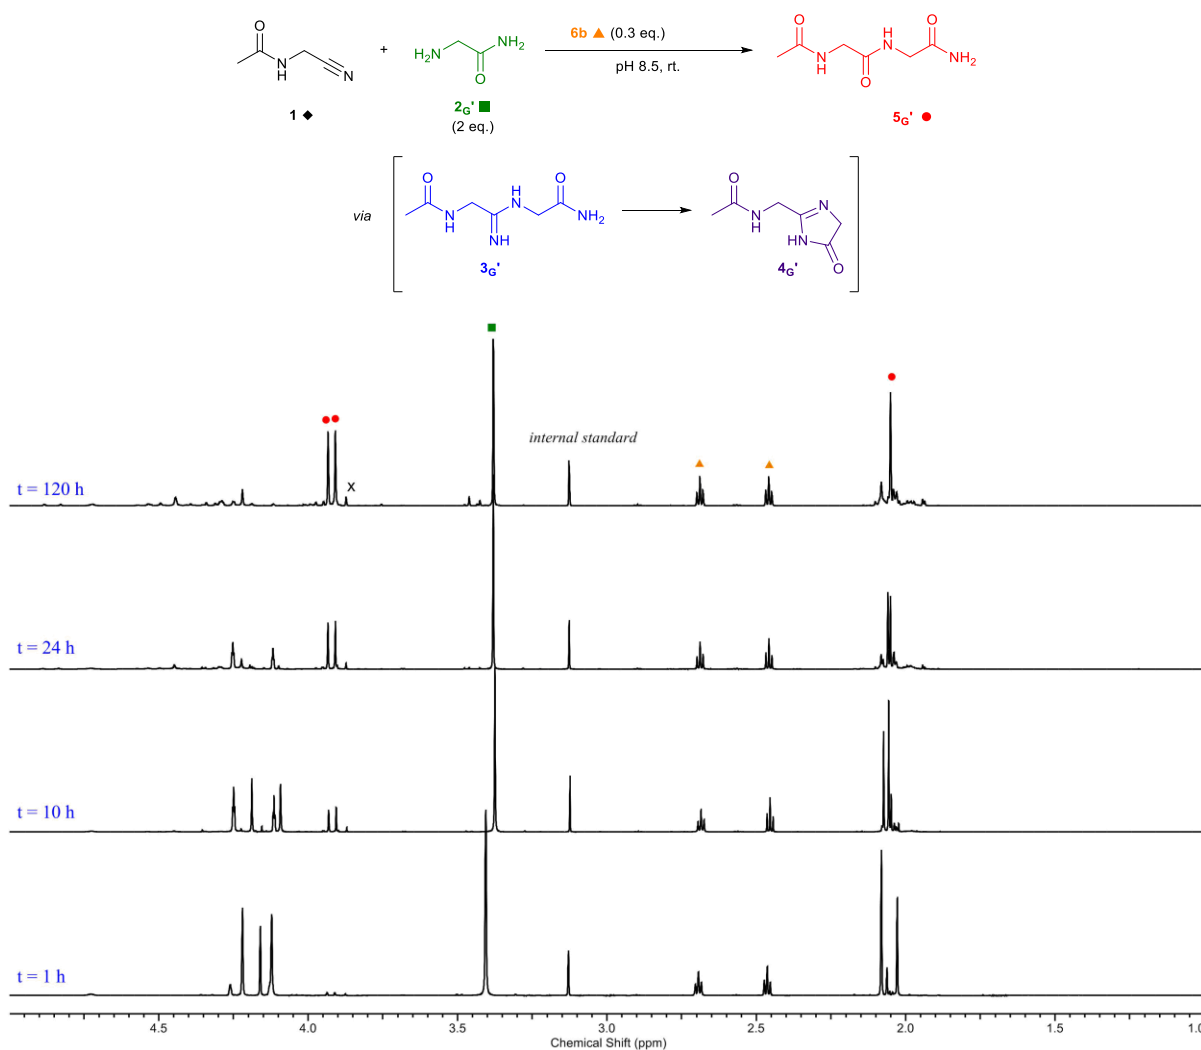

**Figure S70:** <sup>1</sup>H NMR (700 MHz, H<sub>2</sub>O/D<sub>2</sub>O 9:1, noesygppr1d, 1.0-5.0 ppm) spectrum to show the reaction of N-acetyl glycine nitrile (**1**, 200 mM) with glycineamide (**2G'**, 400 mM) and 3-mercaptopropanoic acid (**6b**, 60 mM) with MSM (7 mM) as an internal standard at pH 9 and room temperature.

<sup>1</sup>H NMR (700 MHz, H<sub>2</sub>O/D<sub>2</sub>O 9:1) **5G'** (●): δ<sub>H</sub> 3.96 (2H, s, AcNHCH<sub>2</sub>), 3.94 (2H, s, CH<sub>2</sub>CONH<sub>2</sub>), 2.08 (3H, s, H<sub>3</sub>C(CO)); Glycinamide, **2G'** (■): δ<sub>H</sub> 3.41 (2H, s, CH<sub>2</sub>).

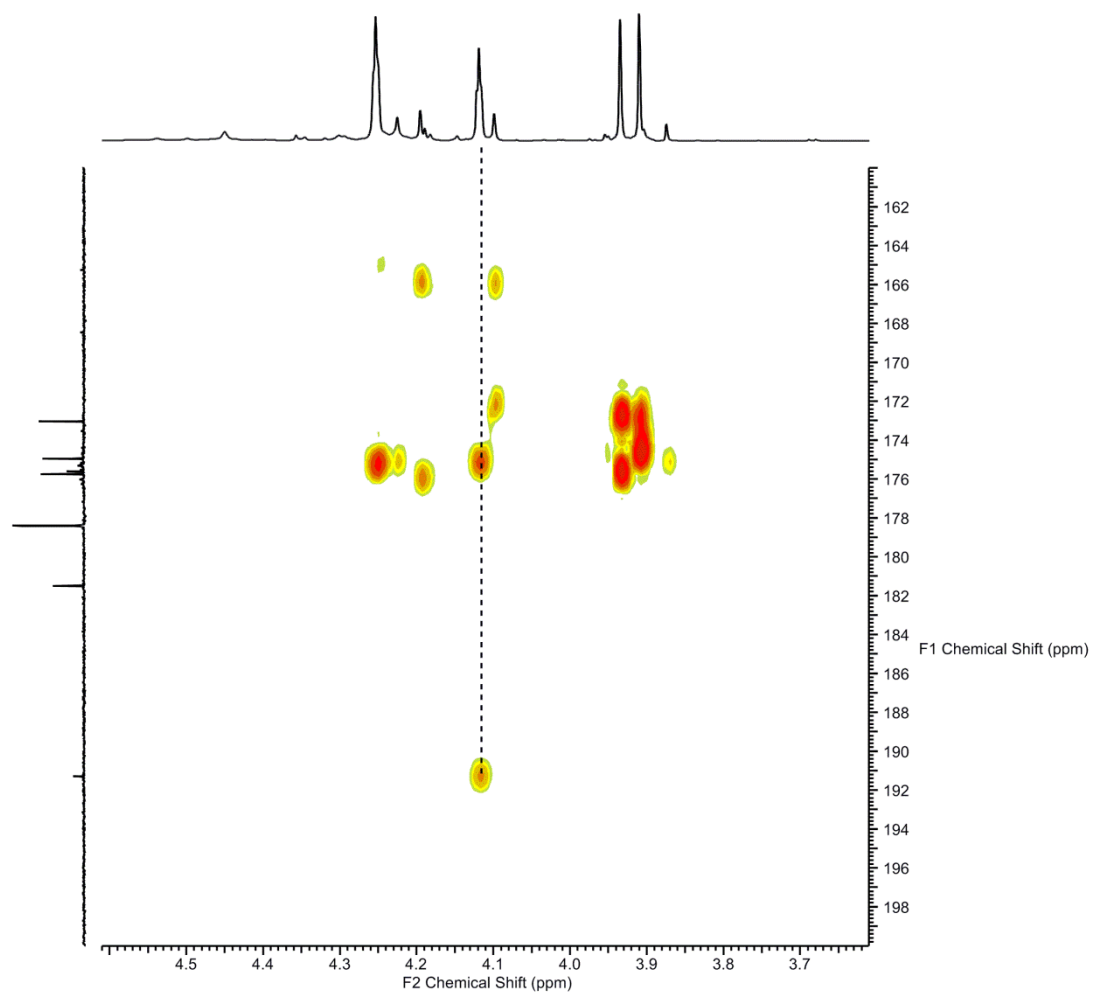

**Figure S71:** <sup>1</sup>H-<sup>13</sup>C HMBC (<sup>1</sup>H: 700 MHz [3.6-4.6 ppm], <sup>13</sup>C: 176 MHz [160-200 ppm], H<sub>2</sub>O/D<sub>2</sub>O 9:1) spectrum for the coupling of **1** and **2c'** catalyzed by 3-mercaptopropionic acid (**6b**) at pH 8.5 after 24 h, showing the diagnostic coupling of the imidazolone amide signal in **4g** at 191.3 ppm with signals at 4.12 ppm (**Gly**-αH, <sup>2</sup>J<sub>CH</sub>) which is characteristic of imidazolone formation.

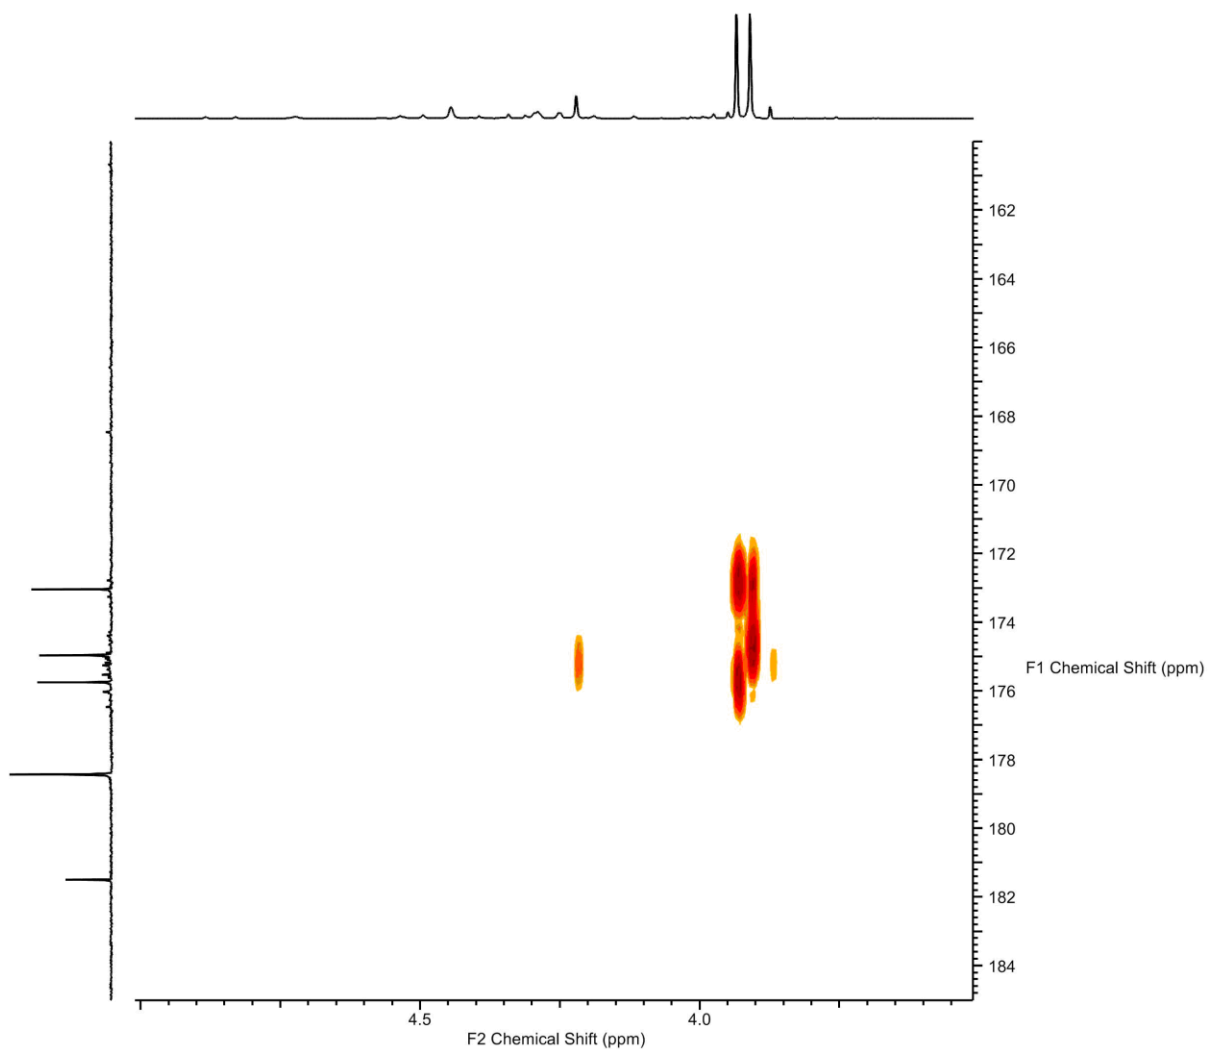

**Figure S72:**  $^1\text{H}$ - $^{13}\text{C}$  HMBC ( $^1\text{H}$ : 700 MHz [3.5–5.0 ppm],  $^{13}\text{C}$ : 176 MHz [160–185 ppm],  $\text{H}_2\text{O}/\text{D}_2\text{O}$  9:1) spectrum showing the diagnostic  $^2\text{J}_{\text{CH}}$  and  $^3\text{J}_{\text{CH}}$  coupling of Gly- $\alpha\text{H}$ -CONH<sub>2</sub> in **5g** at 3.94 ppm with two resonances at 175.0 and 173.0 ppm.

Coupling of *N*-acetylglycine nitrile **1** with *L*-histidine amide **2<sub>H</sub>'** at pH 8.5 and room temperature

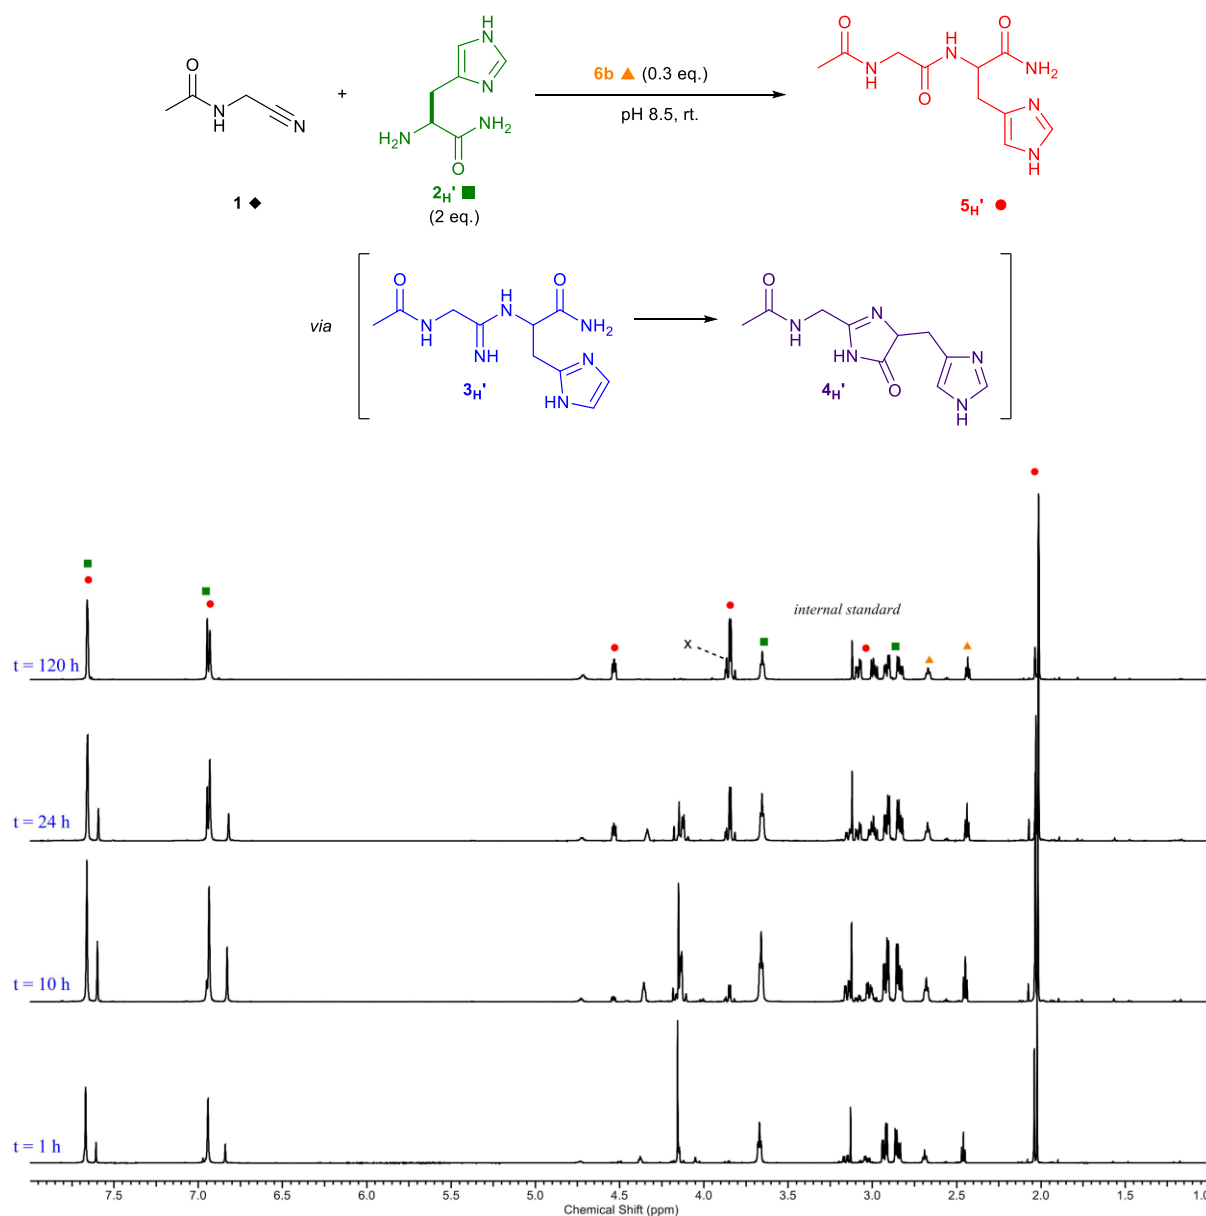

**Figure S73:**  $^1\text{H}$  NMR (700 MHz,  $\text{H}_2\text{O}/\text{D}_2\text{O}$  9:1, noesygppr1d, 1.0-5.0 ppm) spectrum to show the reaction of *N*-acetyl glycine nitrile (**1**, 200 mM) with *L*-histidine amide (**2<sub>H</sub>'**, 400 mM) and 3-mercaptopropanoic acid (**6b**, 60 mM) with MSM (7 mM) as an internal standard at pH 8.5 and room temperature.

$^1\text{H}$  NMR (700 MHz,  $\text{H}_2\text{O}/\text{D}_2\text{O}$  9:1, noesygppr1d) **5<sub>H</sub>'** (●):  $\delta_{\text{H}}$  7.69 (1H, s, ArH), 6.98 (1H, s, ArH), 4.57 (1H, dd,  $J = 8.3, 5.6$  Hz, His- $\alpha\text{H-COOH}$ ), 3.89 (1H, AB,  $J = 16.9$  Hz, AcNHCHH), 3.86 (1H, AB,  $J = 16.9$  Hz, AcNHCHH), 3.11 (1H, ABX,  $J = 15.0, 5.4$  Hz, CH(CHHAr)), 3.02 (1H, ABX,  $J = 15.0, 8.3$  Hz, CH(CHHAr)), 2.05 (3H, s,  $\text{H}_3\text{C}(\text{CO})$ ); *L*-histidine amide, **2<sub>H</sub>'** (■):  $\delta_{\text{H}}$  7.69 (1H, s, ArH), 6.96 (1H, s, ArH), 3.69 (1H, t,  $J = 6.3$  Hz,  $\alpha\text{-H-COOH}$ ), 2.94 (1H, ABX,  $J = 14.7, 6.1$  Hz, CH(CHHAr)), 2.87 (1H, ABX,  $J = 14.7, 7.0$  Hz, CH(CHHAr)); *N*-acetylglucosamine, **7** (✕) (partial assignment):  $\delta_{\text{H}}$  3.90 (2H, s,  $\text{CH}_2$ ).

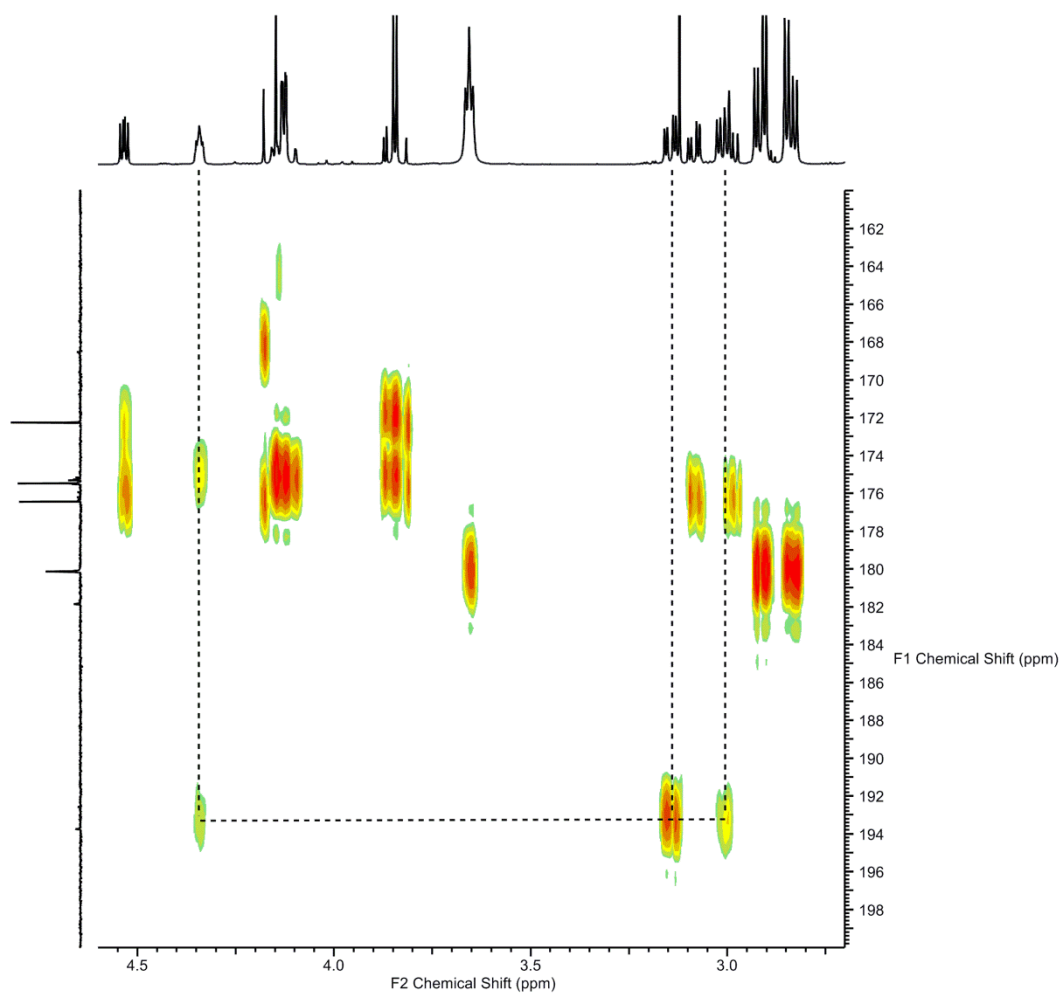

**Figure S74:**  $^1\text{H}$ - $^{13}\text{C}$  HMBC ( $^1\text{H}$ : 700 MHz [2.7-4.6 ppm],  $^{13}\text{C}$ : 176 MHz [160-200 ppm],  $\text{H}_2\text{O}/\text{D}_2\text{O}$  9:1) spectrum for the coupling of **1** and **2<sub>H</sub>** catalyzed by 3-mercaptopropionic acid (**6b**) at pH 8.5 after 24 h, showing the diagnostic coupling of the imidazolone amide signal in **4<sub>H</sub>** at 193.8 ppm with signals at 4.34 ppm (**His- $\alpha$ H**,  $^2\text{J}_{\text{CH}}$ ), 3.15 and 3.00 ppm (**His- $\beta$ H**,  $^3\text{J}_{\text{CH}}$ ), which is characteristic of imidazolone formation.

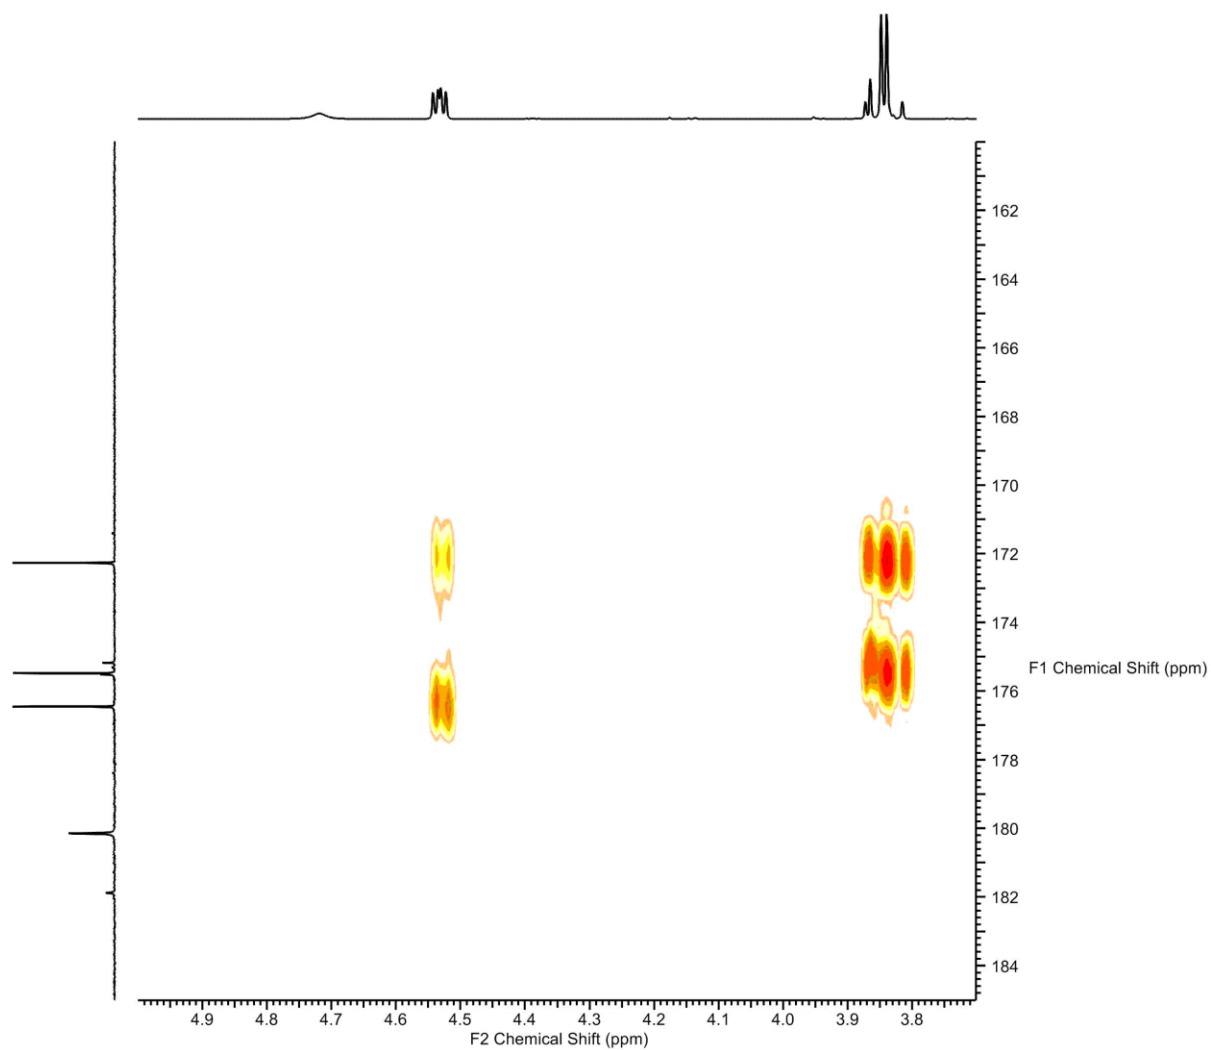

**Figure S75:**  $^1\text{H}$ - $^{13}\text{C}$  HMBC ( $^1\text{H}$ : 700 MHz [3.7–5.0 ppm],  $^{13}\text{C}$ : 176 MHz [160–185 ppm],  $\text{H}_2\text{O}/\text{D}_2\text{O}$  9:1) spectrum showing the diagnostic  $^2J_{\text{CH}}$  and  $^3J_{\text{CH}}$  coupling of the His- $\alpha\text{H}$  in  $5\text{H}'$  at 4.57 ppm with two resonances at 176.4 and 172.2 ppm.

Coupling of *N*-acetylglycine nitrile **1** with *L*-isoleucinamide **2**' at pH 8.5 and room temperature

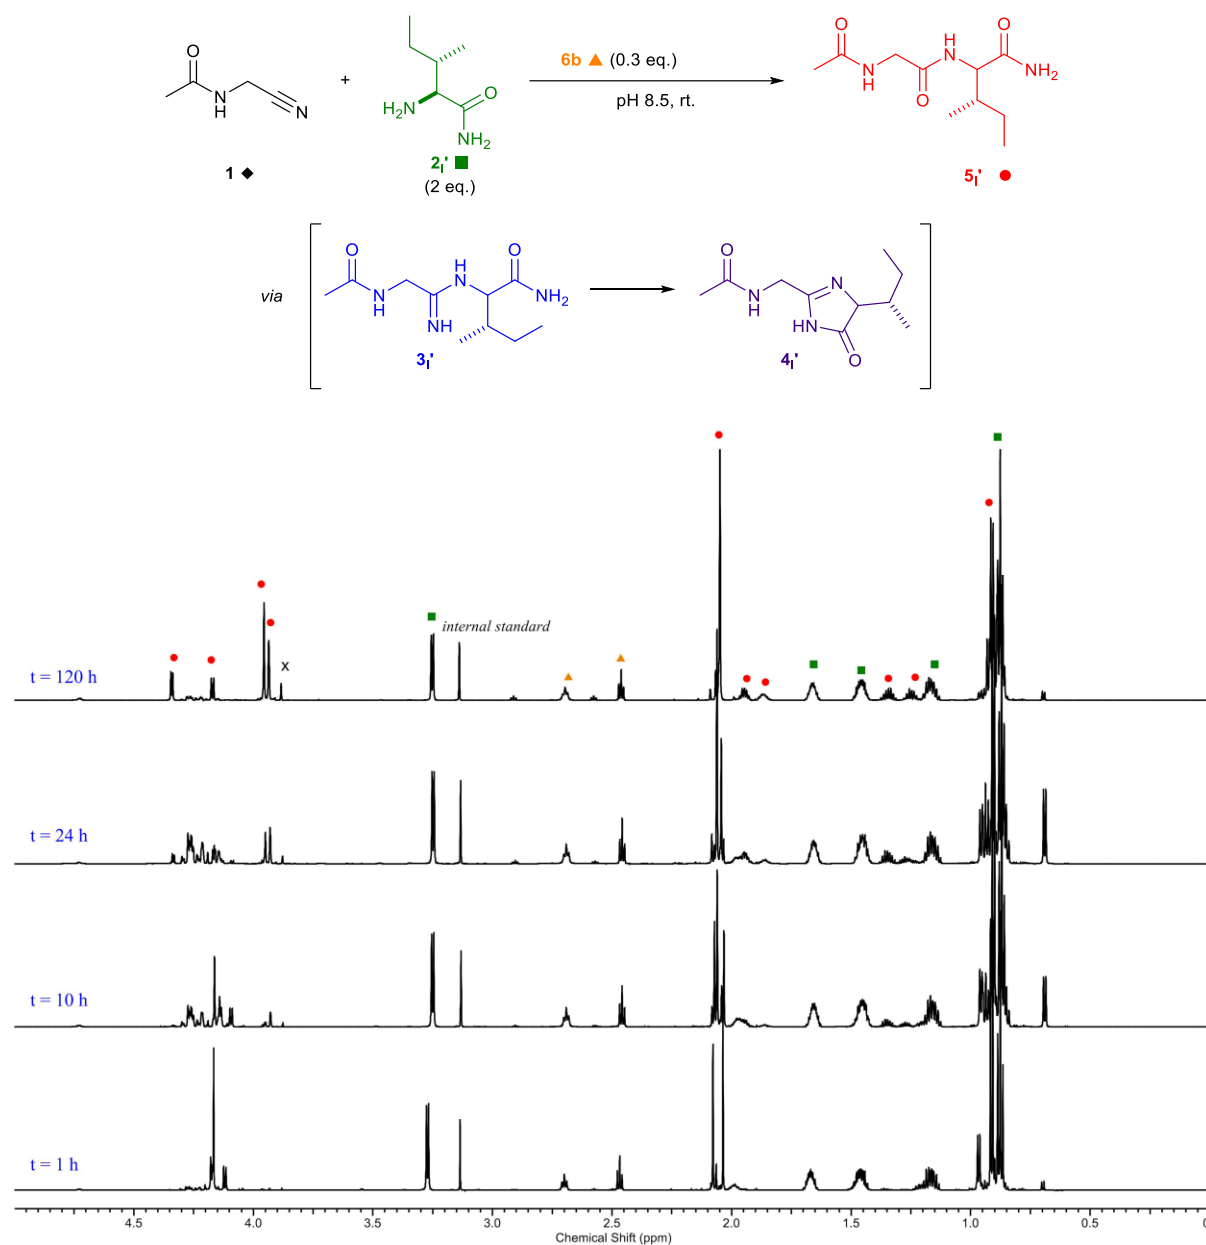

**Figure S76:**  $^1\text{H}$  NMR (700 MHz,  $\text{H}_2\text{O}/\text{D}_2\text{O}$  9:1, noesygppr1d, 0.0–5.0 ppm) spectrum to show the reaction of *N*-acetyl glycine nitrile (**1**, 200 mM) with *L*-isoleucinamide (**2**', 400 mM) and 3-mercaptopropanoic acid (**6b**, 60 mM) with MSM (7 mM) as an internal standard at pH 8.5 and room temperature and  $\times = 7$ .

$^1\text{H}$  NMR (700 MHz,  $\text{H}_2\text{O}/\text{D}_2\text{O}$  9:1, noesygppr1d) **5**' (●) (partial assignment, mixture of diastereomers **A** and **B**, 11:9):  $\delta_{\text{H}}$  4.34 (1H, d,  $J = 5.4$  Hz, **A** Ile- $\alpha\text{H}$ -COOH), 4.18 (1H, d,  $J = 7.0$  Hz, **B** Ile- $\alpha\text{H}$ -COOH), 3.96 (2H, s, **A** AcNHCH<sub>2</sub>), 3.94 (2H, s, **B** AcNHCH<sub>2</sub>), 2.05 (3H each for **A** and **B**, s, H<sub>3</sub>C(CO)), 1.98–1.91 (m, 1H, **A** Ile- $\beta\text{H}$ (CH<sub>3</sub>)CH<sub>2</sub>CH<sub>3</sub>), 1.38–1.31 (m, 1H, **A** Ile-CH(CH<sub>3</sub>)CHHCH<sub>3</sub>), 1.22–1.22 (m, 1H, **A** Ile-CH(CH<sub>3</sub>)CHHCH<sub>3</sub>); *L*-isoleucinamide, **2**' (■):  $\delta_{\text{H}}$  3.25 (1H, d,  $J = 6.1$  Hz,  $\alpha\text{H}$ -CONH<sub>2</sub>) 1.69–1.63 (1H, m, Ile- $\beta\text{H}$ (CH<sub>3</sub>)CH<sub>2</sub>CH<sub>3</sub>) 1.49–1.42 (1H, m, Ile-CH(CH<sub>3</sub>)CHHCH<sub>3</sub>), 1.20–1.12 (1H, m, Ile-CH(CH<sub>3</sub>)CHHCH<sub>3</sub>), 0.91 (3H, d,  $J = 7.0$  Hz, Ile-CH(CH<sub>3</sub>)CH<sub>2</sub>CH<sub>3</sub>), 0.88 (3H, t,  $J = 7.4$  Hz, Ile-CH(CH<sub>3</sub>)CH<sub>2</sub>CH<sub>3</sub>); *N*-acetylglycinamide, **7** (×) (partial assignment):  $\delta_{\text{H}}$  3.90 (2H, s, CH<sub>2</sub>).

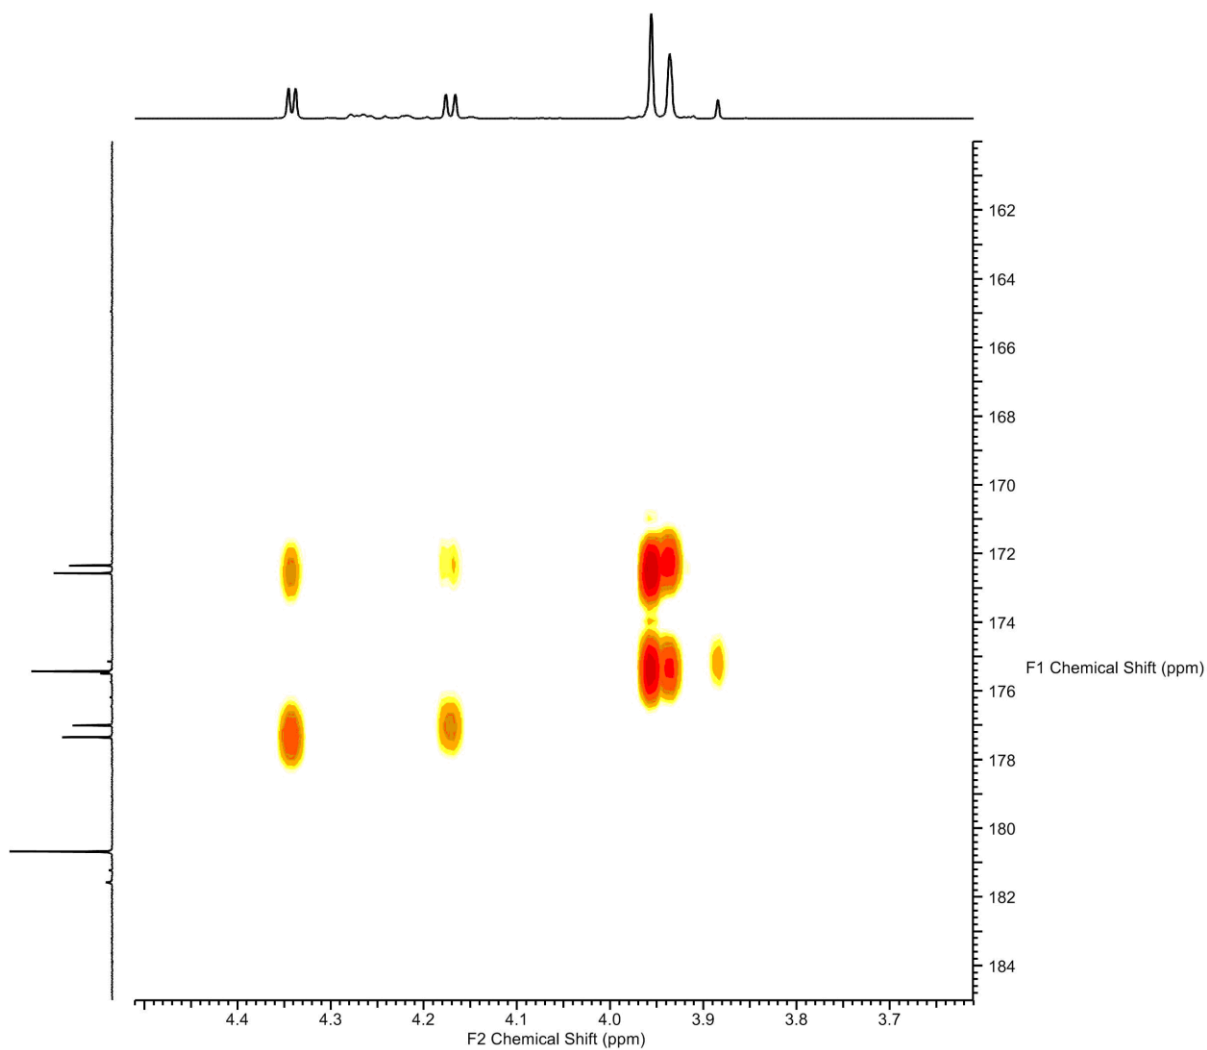

**Figure S77:**  $^1\text{H}$ - $^{13}\text{C}$  HMBC ( $^1\text{H}$ : 700 MHz [3.4–4.5 ppm],  $^{13}\text{C}$ : 176 MHz [150–185 ppm],  $\text{H}_2\text{O}/\text{D}_2\text{O}$  9:1) spectrum showing the diagnostic  $^2\text{J}_{\text{CH}}$  and  $^3\text{J}_{\text{CH}}$  coupling of the two diastereomers of **IIe- $\alpha$ H** in **5r'** at 4.34 ppm with two resonances at 177.3 and 172.6 ppm, and 4.18 ppm with two resonances at 177.0 and 172.3 ppm.



Coupling of *N*-acetylglycine nitrile **1** with *L*-leucinamide **2<sub>L</sub>'** at pH 8.5 and room temperature

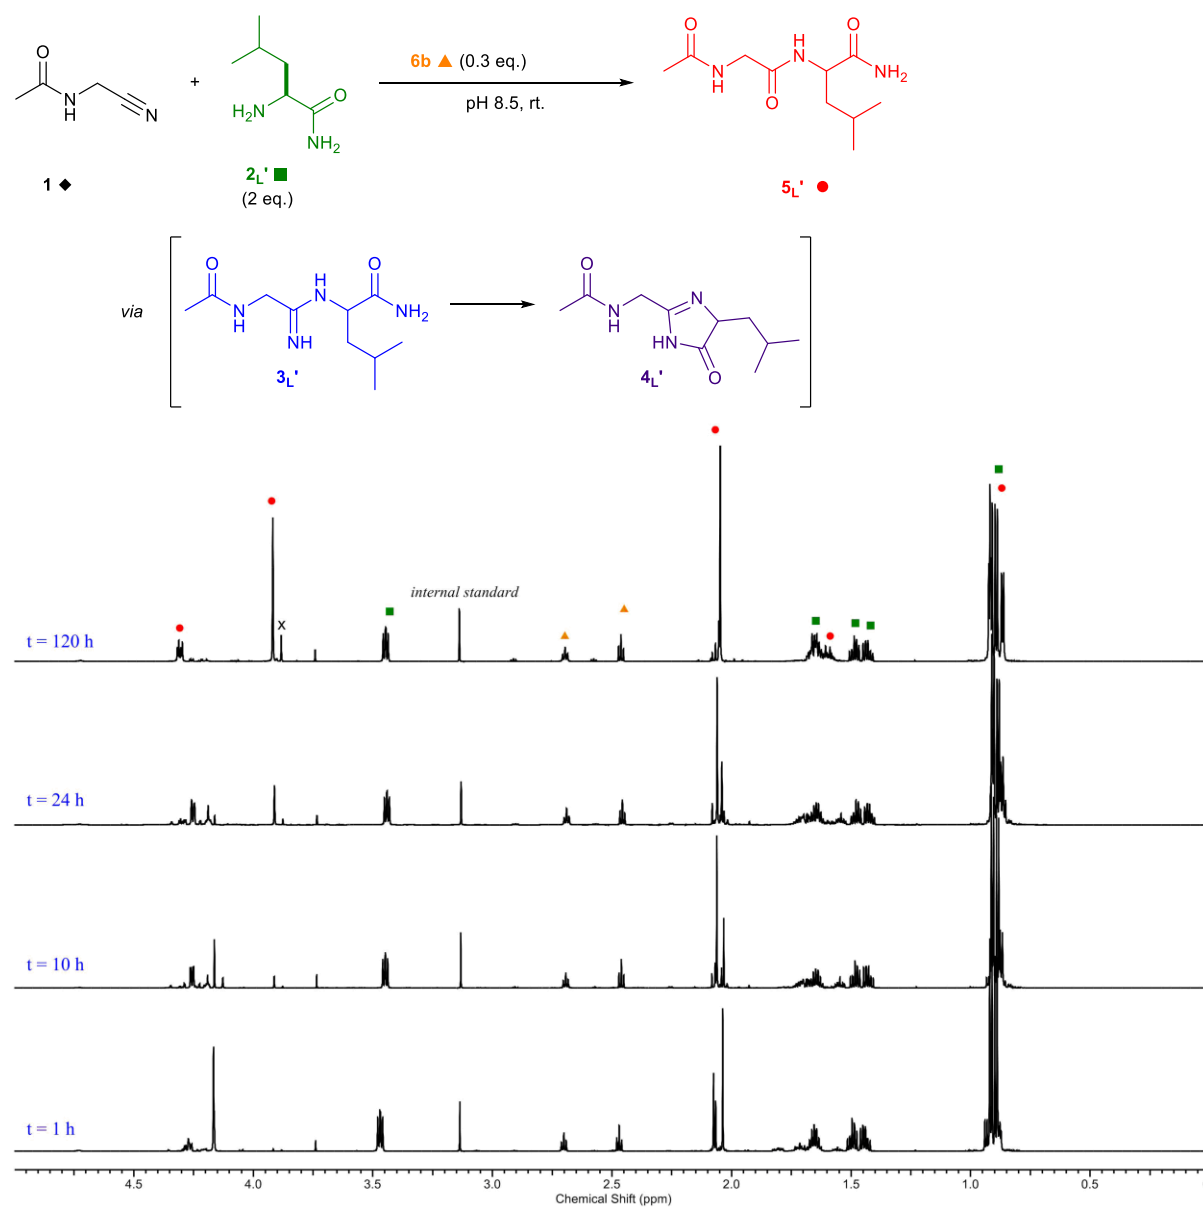

**Figure S78:**  $^1\text{H}$  NMR (700 MHz,  $\text{H}_2\text{O}/\text{D}_2\text{O}$  9:1, noesygppr1d, 0.0-5.0 ppm) spectrum to show the reaction of *N*-acetyl glycine nitrile (**1**, 200 mM) with *L*-leucinamide (**2<sub>L</sub>'**, 400 mM) and 3-mercaptopropanoic acid (**6b**, 60 mM) with MSM (**7** mM) as an internal standard at pH 8.5 and room temperature.  $\times = 7$ .

$^1\text{H}$  NMR (700 MHz,  $\text{H}_2\text{O}/\text{D}_2\text{O}$  9:1, noesygppr1d) **5<sub>L</sub>'** (●) (partial assignment):  $\delta_{\text{H}}$  4.34 (1H, dd,  $J = 10.4, 4.4$  Hz, Leu- $\alpha\text{H}$ -COOH), 3.95 (1H, AB,  $J = 17.1$  Hz, AcNHCH<sub>2</sub>), 2.07 (3H, s, H<sub>3</sub>C(CO)), 1.72-1.58 (3H, m; Leu- $\beta\text{CH}_2$ -CH-(CH<sub>3</sub>)<sub>2</sub>), 0.95 (3H, d,  $J = 6.1$  Hz, Leu-(CH<sub>3</sub>)), 0.89 (3H, d,  $J = 6.3$  Hz, Leu-(CH<sub>3</sub>)); *L*-leucinamide, **2<sub>L</sub>'** (■) (partial assignment):  $\delta_{\text{H}}$  3.47 (1H, dd,  $J = 8.0, 6.4$  Hz,  $\alpha\text{H}$ -CONH<sub>2</sub>), 1.72-1.64 (1H, m; Leu-CH-(CH<sub>3</sub>)<sub>2</sub>), 1.54-1.43 (2H, m; Leu- $\beta\text{CH}_2$ ), 0.94 (3H, d,  $J = 6.7$  Hz, Leu-(CH<sub>3</sub>)), 0.92 (3H, d,  $J = 6.3$  Hz, Leu-(CH<sub>3</sub>)); *N*-acetylglycinamide, **7** (×) (partial assignment):  $\delta_{\text{H}}$  3.91 (2H, s, CH<sub>2</sub>).

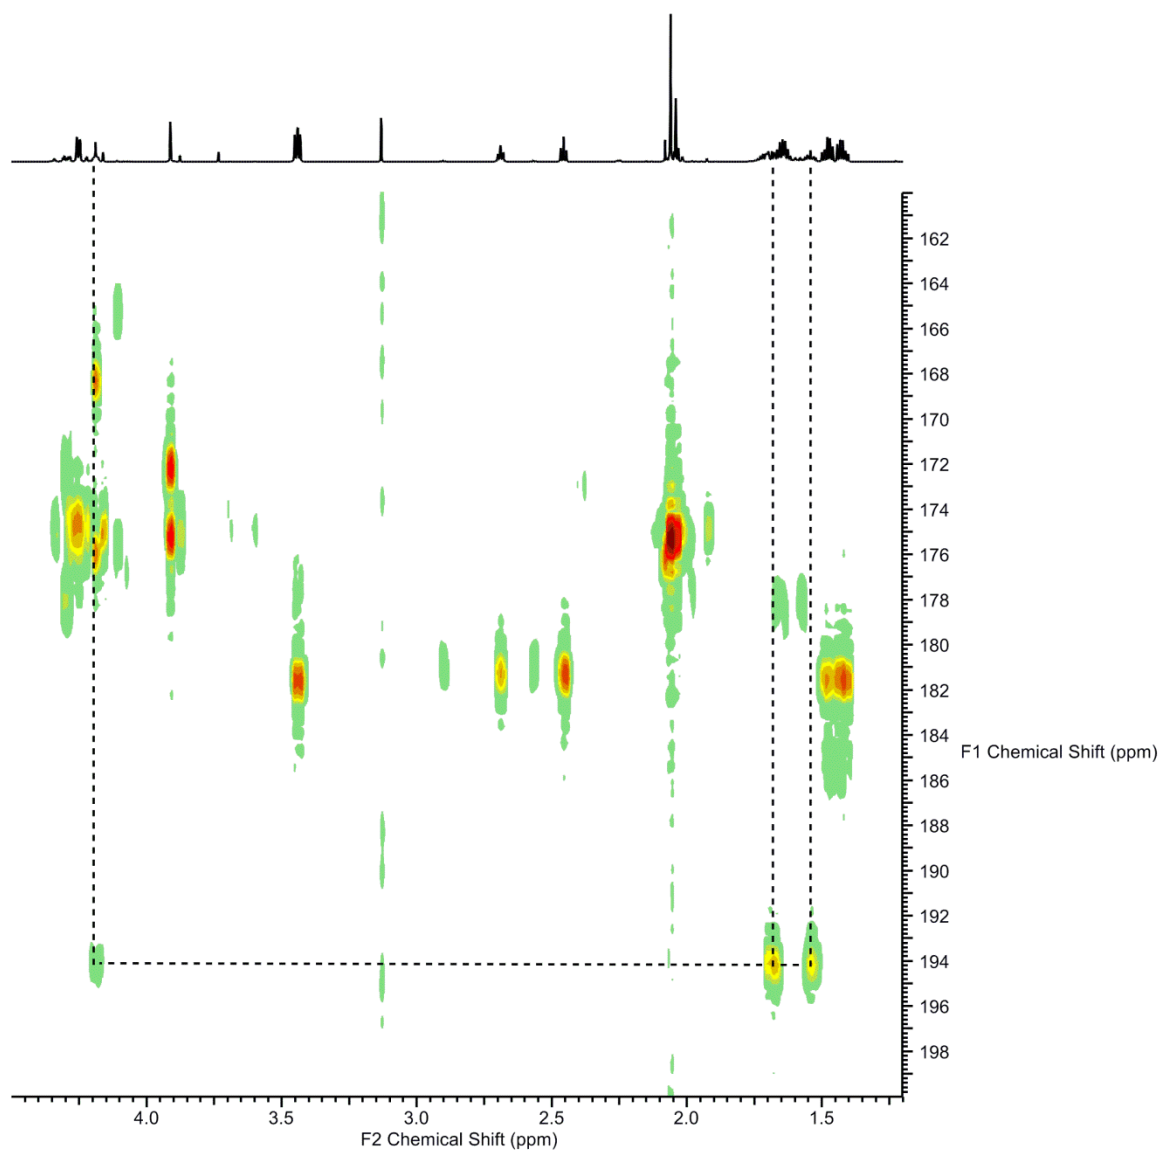

**Figure S79:**  $^1\text{H}$ - $^{13}\text{C}$  HMBC ( $^1\text{H}$ : 700 MHz [1.7-4.5 ppm],  $^{13}\text{C}$ : 176 MHz [160-200 ppm],  $\text{H}_2\text{O}/\text{D}_2\text{O}$  9:1) spectrum for the coupling of **1** and **2L'** catalyzed by 3-mercaptopropionic acid (**6b**) at pH 8.5 after 24 h, showing the diagnostic coupling of the imidazolone amide signal in **4L** at 194.2 ppm with signals at 4.19 ppm (**Leu**- $\alpha\text{H}$ ,  $^2\text{J}_{\text{CH}}$ ), 1.70 and 1.54 ppm (**Leu**- $\beta\text{H}$ ,  $^3\text{J}_{\text{CH}}$ ), which is characteristic of imidazolone formation.

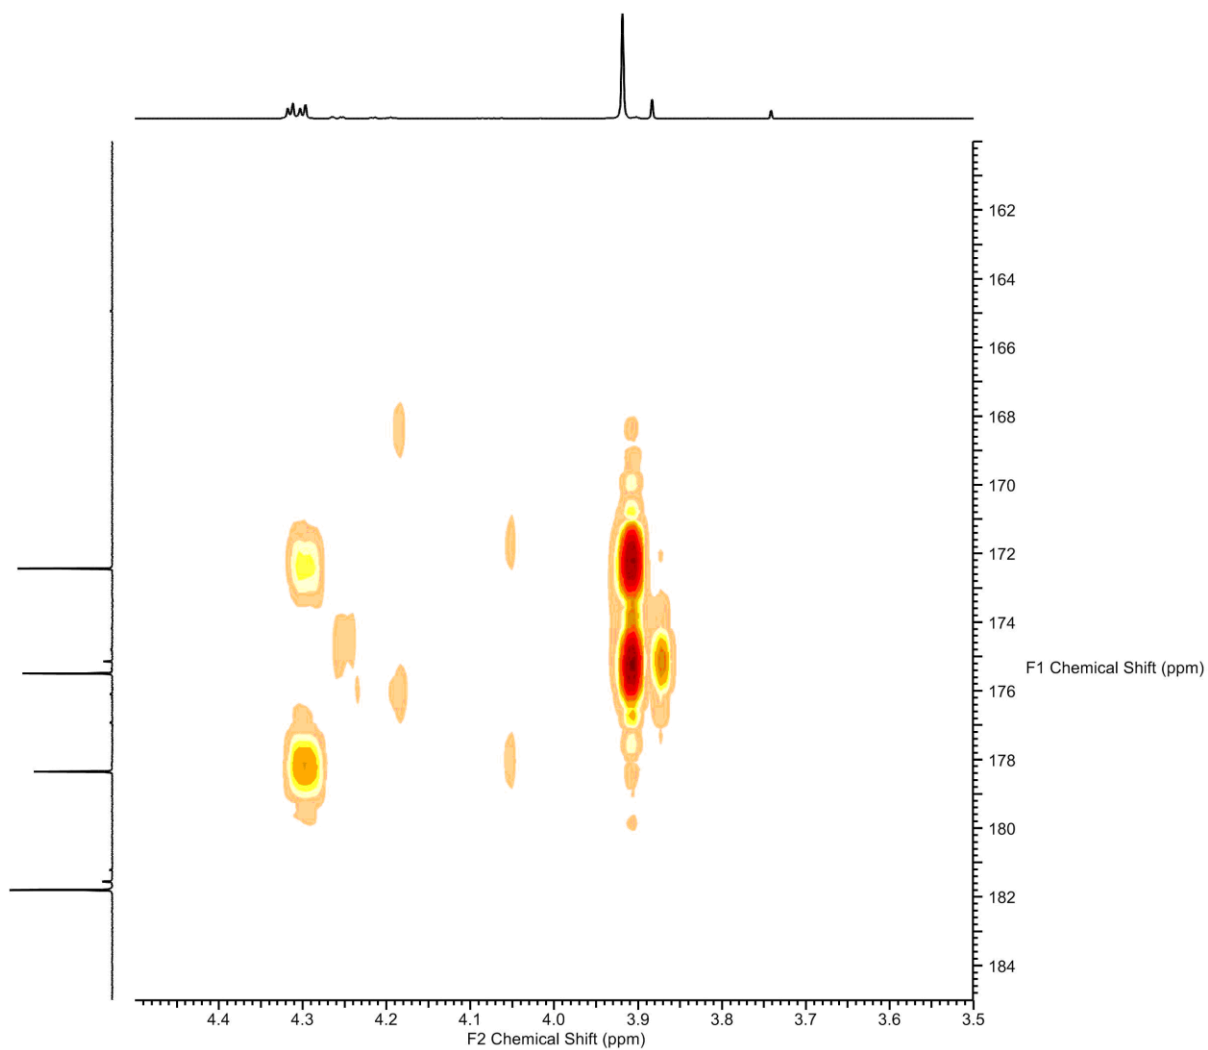

**Figure S80:** <sup>1</sup>H-<sup>13</sup>C HMBC (<sup>1</sup>H: 700 MHz [3.5-4.5 ppm], <sup>13</sup>C: 176 MHz [150-185 ppm], H<sub>2</sub>O/D<sub>2</sub>O 9:1) spectrum showing the diagnostic <sup>2</sup>J<sub>CH</sub> and <sup>3</sup>J<sub>CH</sub> coupling of the Leu-αH in **5L'** at 4.08 ppm with two resonances at 178.2 and 172.2 ppm, which is characteristic of amide bond formation of **2L'**.

Coupling of *N*-acetylglycine nitrile **1** with *DL*-methionine amide **2<sub>M</sub>'** at pH 8.5 and room temperature

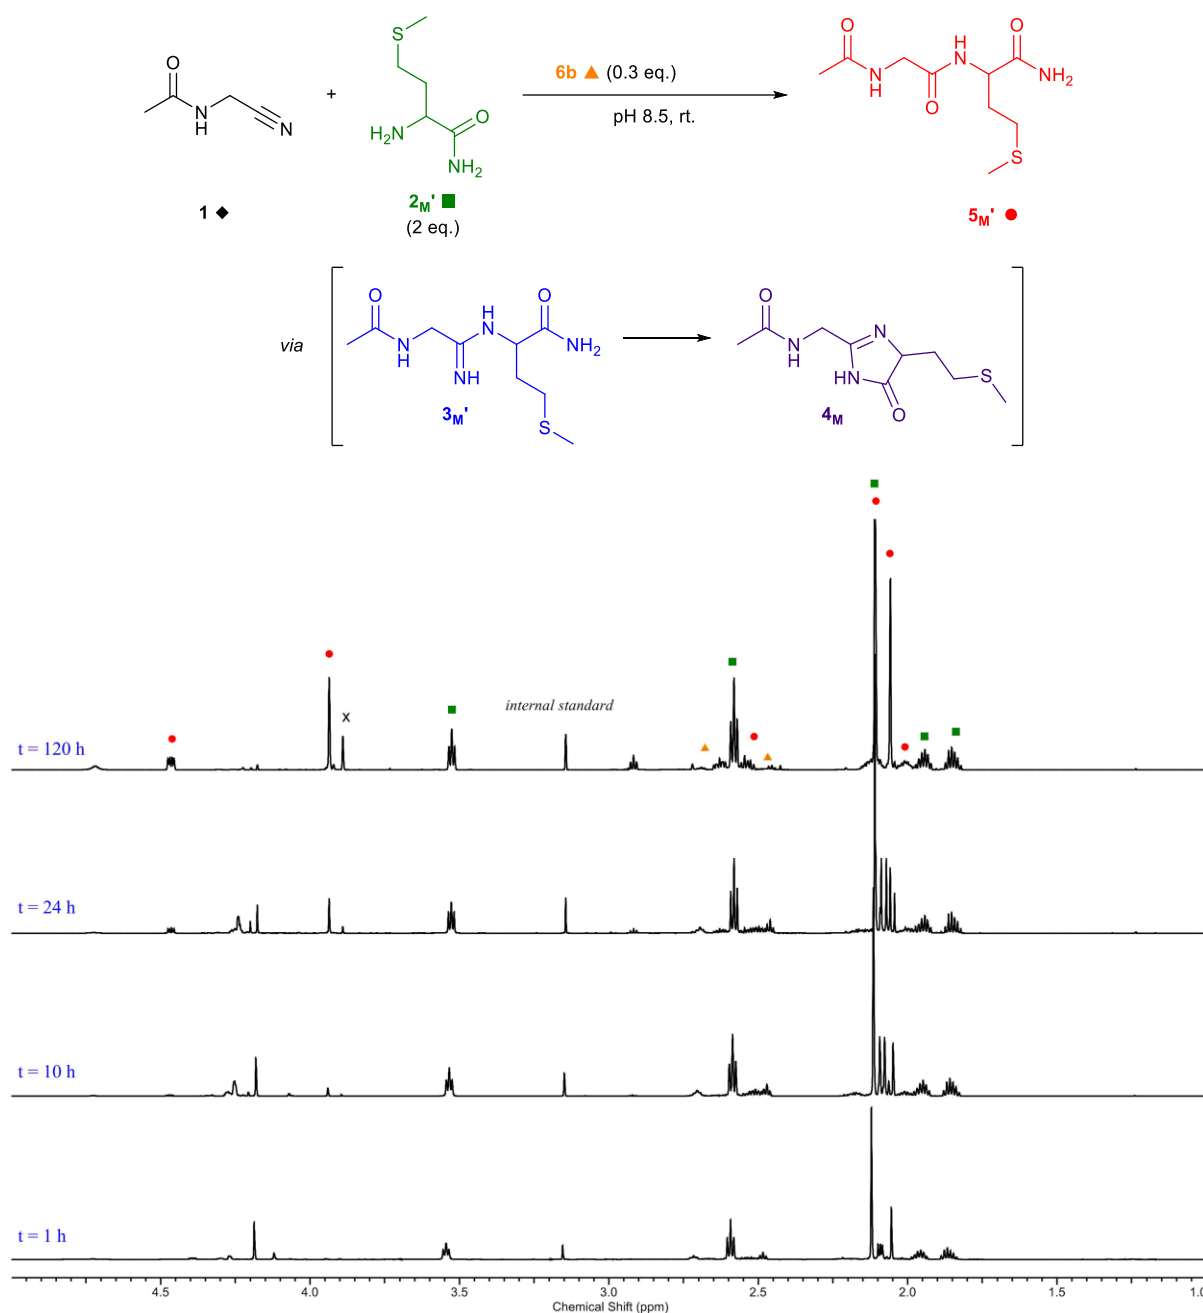

**Figure S81:** <sup>1</sup>H NMR (700 MHz, H<sub>2</sub>O/D<sub>2</sub>O 9:1, noesygppr1d, 1.0-5.0 ppm) spectrum to show the reaction of *N*-acetyl glycine nitrile (**1**, 200 mM) with *DL*-methioninamide (**2<sub>M</sub>'**, 400 mM) and 3-mercapto-propanoic acid (**6b**, 60 mM) with MSM (7 mM) as an internal standard pH 8.5 and room temperature. **x** = 7.

<sup>1</sup>H NMR (700 MHz, H<sub>2</sub>O/D<sub>2</sub>O 9:1, noesygppr1d) **5<sub>M</sub>'** (●) (partial assignment): δ<sub>H</sub> 4.50 (1H, dd, *J* = 9.7, 4.5 Hz, Met-*α*H-COOH), 3.97 (2H, s, AcNHCH<sub>2</sub>), 2.68-2.54 (2H, m, CH<sub>2</sub>SCH<sub>3</sub>), 2.14 (3H, s, CH<sub>2</sub>SCH<sub>3</sub>), 2.09 (3H, s, H<sub>3</sub>C(CO)), 2.19-2.04 (m, CH<sub>2</sub>CH<sub>2</sub>SCH<sub>3</sub>); *DL*-methioninamide, **2<sub>M</sub>'** (■) (partial assignment): δ<sub>H</sub> 3.56 (1H, br. t., *J* = 6.6 Hz, αH-COOH), 2.61 (2H, t, *J* = 7.5 Hz, CH<sub>2</sub>SCH<sub>3</sub>), 2.14 (3H, s, SCH<sub>3</sub>); *N*-acetylglycinamide, **7** (x) (partial assignment): δ<sub>H</sub> 3.92 (2H, s, CH<sub>2</sub>).

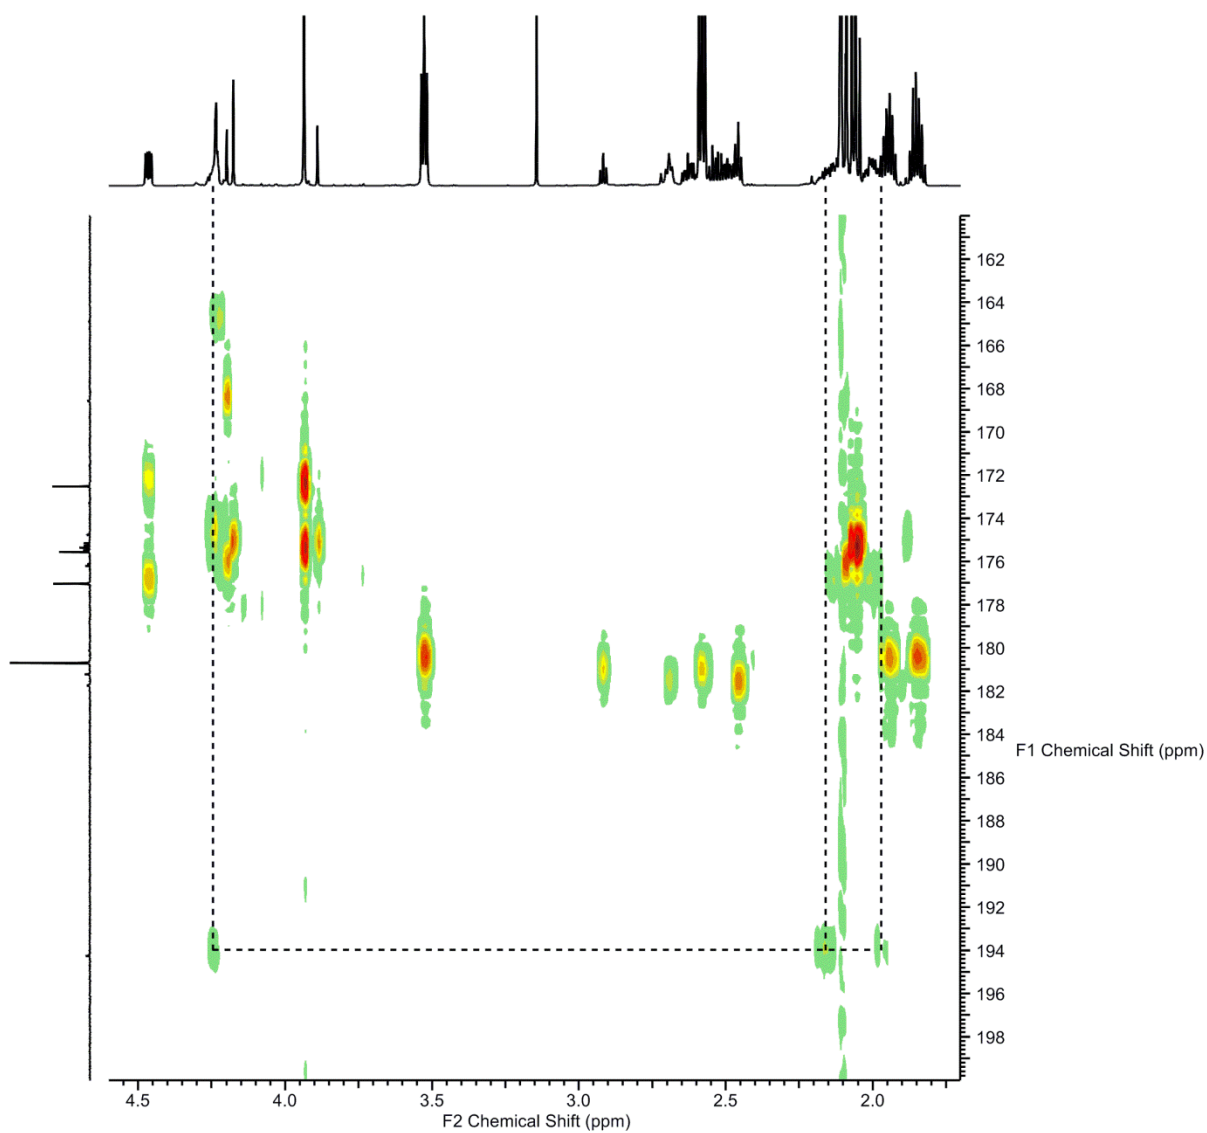

**Figure S82:**  $^1\text{H}$ - $^{13}\text{C}$  HMBC ( $^1\text{H}$ : 700 MHz [1.7-4.6 ppm],  $^{13}\text{C}$ : 176 MHz [160-200 ppm],  $\text{H}_2\text{O}/\text{D}_2\text{O}$  9:1) spectrum for the coupling of **1** and **2M'** catalyzed by 3-mercaptopropionic acid (**6b**) at pH 8.5 after 24 h, showing the diagnostic coupling of the imidazolone amide signal in **4M** at 194.1 ppm with signals at 4.24 ppm (**Met- $\alpha\text{H}$** ,  $^2J_{\text{CH}}$ ), 2.16 and 1.97 ppm (**Met- $\beta\text{H}$** ,  $^3J_{\text{CH}}$ ), which is characteristic of imidazolone formation.

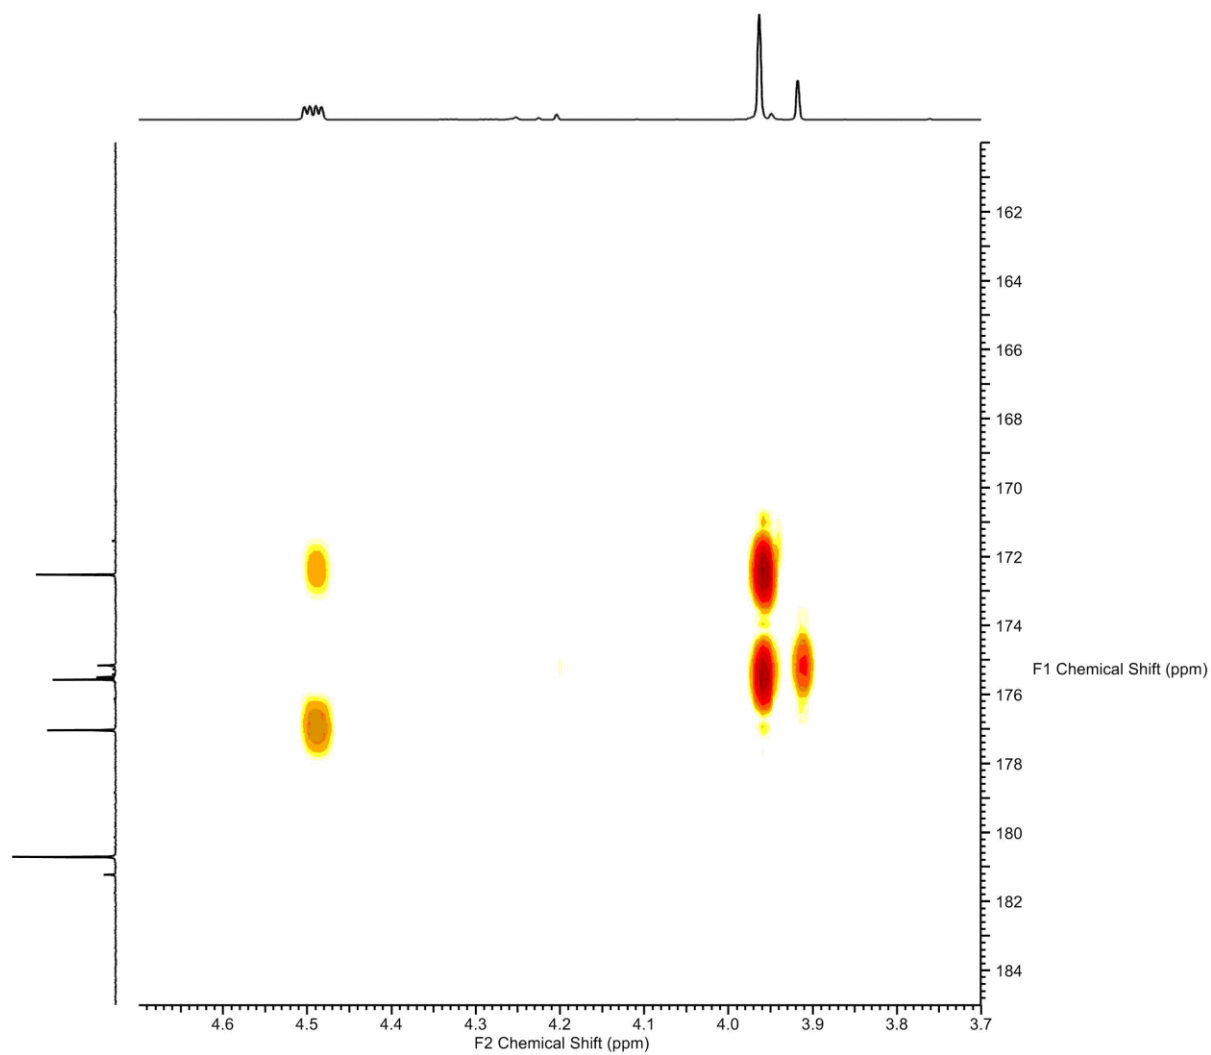

**Figure S83:**  $^1\text{H}$ - $^{13}\text{C}$  HMBC ( $^1\text{H}$ : 700 MHz [3.7-4.7 ppm],  $^{13}\text{C}$ : 176 MHz [160-185 ppm],  $\text{H}_2\text{O}/\text{D}_2\text{O}$  9:1) spectrum showing the diagnostic  $^2\text{J}_{\text{CH}}$  and  $^3\text{J}_{\text{CH}}$  coupling of the **Met**- $\alpha\text{H}$  in **5M'** at 4.50 ppm with two resonances at 176.4 and 172.2 ppm, which is characteristic of amide bond formation.

Coupling of *N*-acetylglycine nitrile **1** with *L*-phenylalaninamide **2F'** at pH 8.5 and room temperature

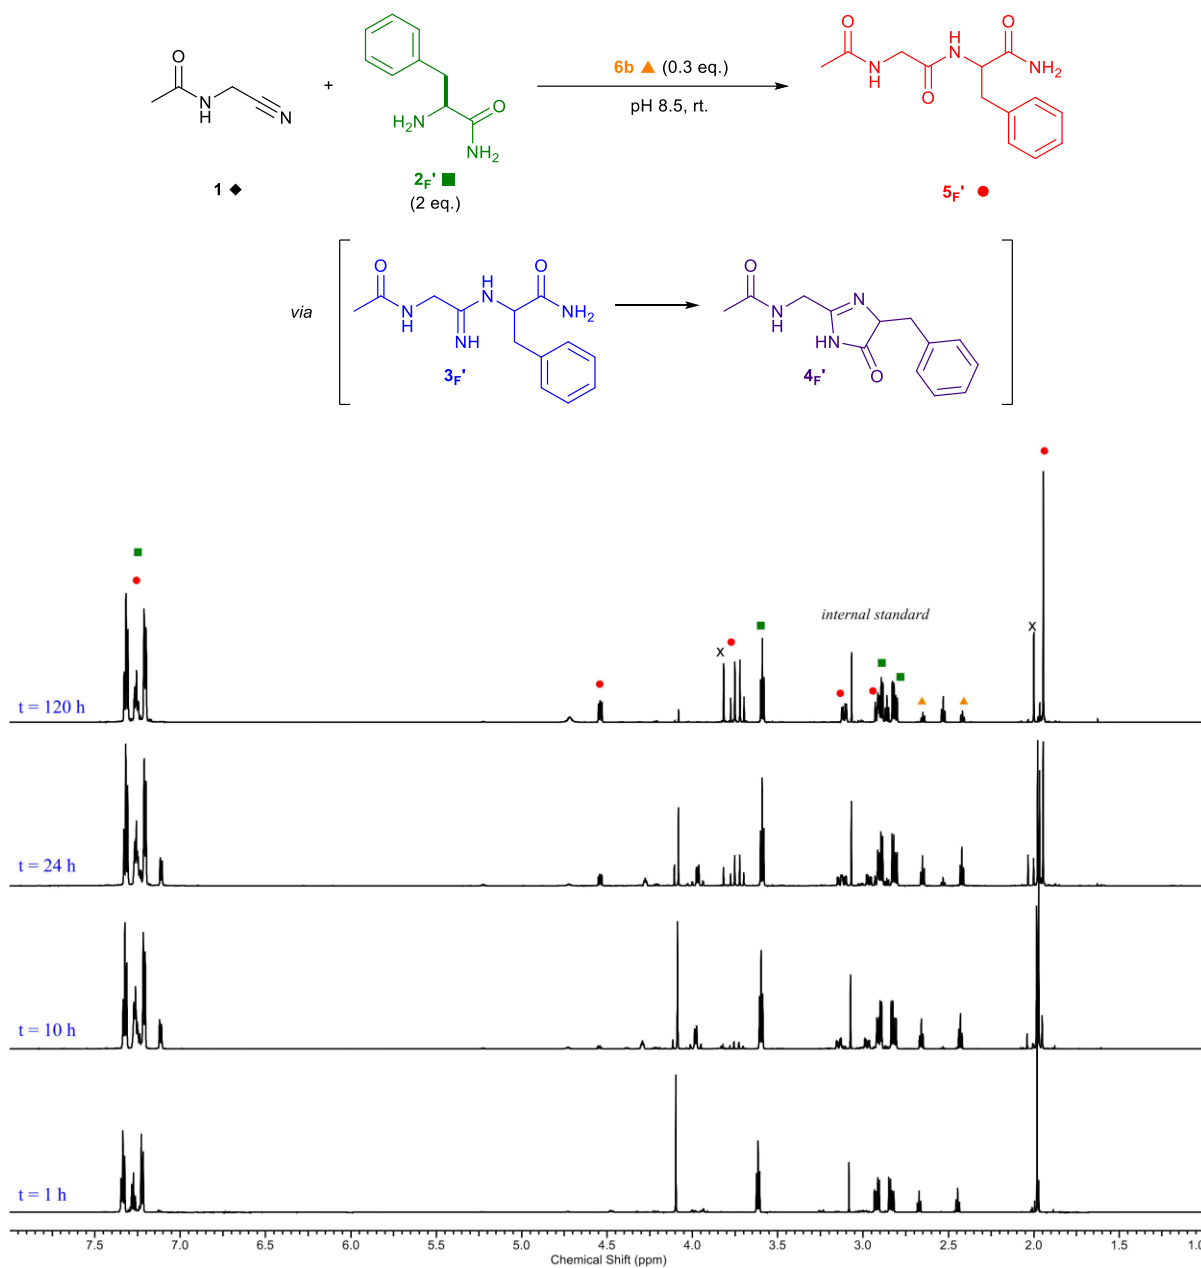

**Figure S84:**  $^1\text{H}$  NMR (700 MHz,  $\text{H}_2\text{O}/\text{D}_2\text{O}$  9:1, noesygppr1d, 1.0-8.0 ppm) spectrum to show the reaction of *N*-acetyl glycine nitrile (**1**, 200 mM) with *L*-phenylalaninamide (**2M'**, 400 mM) and 3-mercaptopropanoic acid (**6b**, 60 mM) with MSM (7 mM) as internal standard at pH 8.5 and room temperature.

$^1\text{H}$  NMR (700 MHz,  $\text{H}_2\text{O}/\text{D}_2\text{O}$  9:1, noesygppr1d) **5F'** (partial assignment) (●):  $\delta_{\text{H}}$  4.57 (1H, dd,  $J = 9.0, 5.8$  Hz, Phe- $\alpha\text{H-COOH}$ ), 3.79 (1H, AB,  $J = 17.0$  Hz, AcNHCH $\text{H}$ ), 3.74 (1H, AB,  $J = 17.0$  Hz, AcNHCH $\text{H}$ ), 3.14 (1H, dd,  $J = 14.0, 5.5$  Hz, CHCH $\text{HPh}$ ), 1.98 (3H, s,  $\text{H}_3\text{C}(\text{CO})$ ); *L*-phenylalaninamide **2F'** (■) (partial assignment):  $\delta_{\text{H}}$  3.62 (1H, t,  $J = 6.8$  Hz,  $\alpha\text{H-COOH}$ ), 2.84 (1H, ABX,  $J = 13.5, 7.1$  Hz, CHCH $\text{HPh}$ ); *N*-acetylglycinamide, **7**(×) (partial assignment):  $\delta_{\text{H}}$  3.85 (2H, s,  $\text{CH}_2$ ).

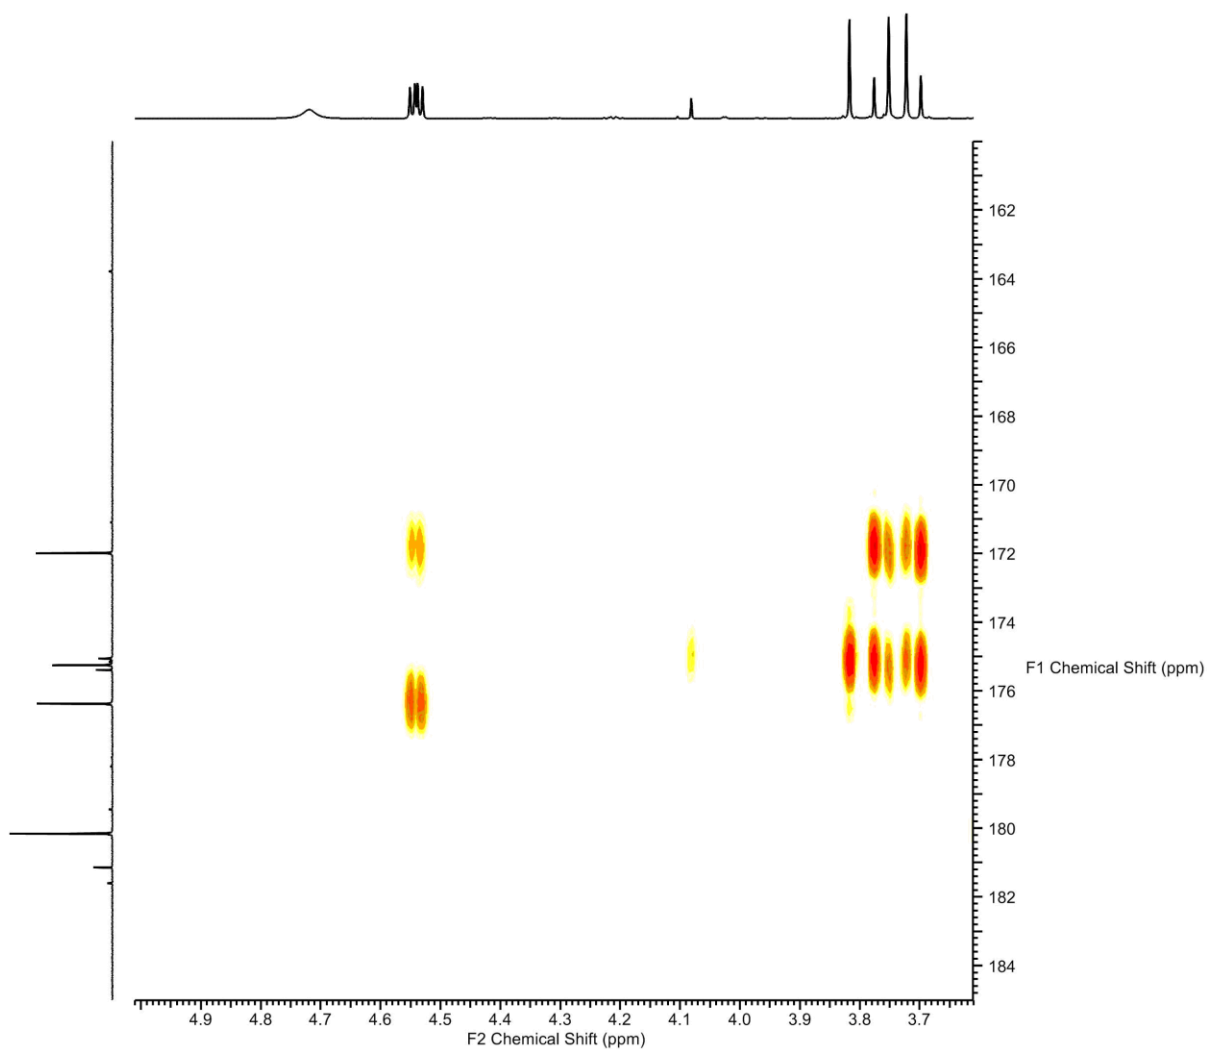

**Figure S85:**  $^1\text{H}$ - $^{13}\text{C}$  HMBC ( $^1\text{H}$ : 700 MHz [3.6-5.0 ppm],  $^{13}\text{C}$ : 176 MHz [160-185 ppm],  $\text{H}_2\text{O}/\text{D}_2\text{O}$  9:1) spectrum showing the diagnostic  $^2\text{J}_{\text{CH}}$  and  $^3\text{J}_{\text{CH}}$  coupling of the **Phe- $\alpha$ H** in **5r** at 4.57 ppm with two resonances at 176.2 and 172.0 ppm, which is characteristic of amide bond formation.



Coupling of *N*-acetylglycine nitrile **1** with *L*-prolinamide **2p'** at pH 8.5 and room temperature

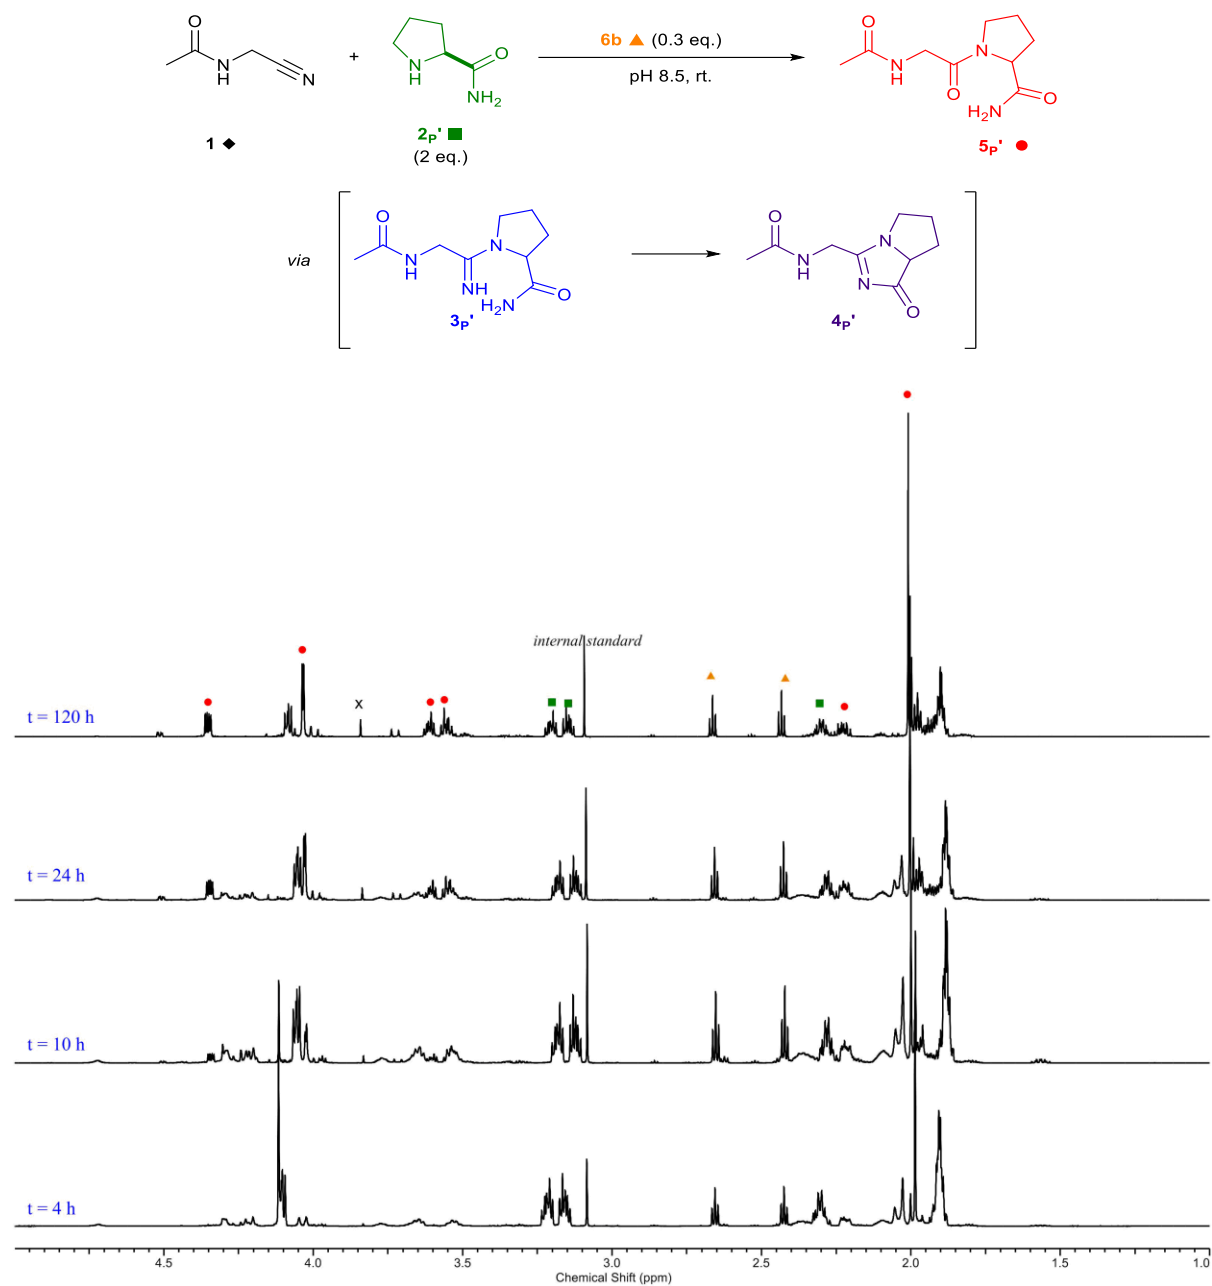

**Figure S86:** <sup>1</sup>H NMR (700 MHz, H<sub>2</sub>O/D<sub>2</sub>O 9:1, noesygppr1d, 1.0-5.0 ppm) spectrum to show the reaction of *N*-acetyl glycine nitrile (**1**, 200 mM) with *L*-prolinamide (**2p'**, 400 mM) and 3-mercaptopropanoic acid (**6b**, 60 mM) with MSM (7 mM) as an internal standard at pH 8.5 and room temperature.

<sup>1</sup>H NMR (700 MHz, H<sub>2</sub>O/D<sub>2</sub>O 9:1, noesygppr1d) **5p'** (●) (partial assignment): δ<sub>H</sub> 4.38 (1H, dd, *J* = 8.9, 4.4 Hz, Pro-*α*H-COOH), 4.07 (1H, AB, *J* = 17.4 Hz, AcNHCHH), 4.05 (1H, AB, *J* = 17.4 Hz, AcNHCHH), 3.66-3.62 (1H, m, NCHHCH<sub>2</sub>CH<sub>2</sub>), 3.60-3.56 (1H, m, NCHHCH<sub>2</sub>CH<sub>2</sub>), 2.28-2.23 (1H, m, NC(CONH<sub>2</sub>)HCCH<sub>2</sub>CH<sub>2</sub>), 2.03 (3H, s, H<sub>3</sub>C(CO)); *L*-prolinamide, **2p'** (■) (partial assignment): δ<sub>H</sub> 4.11 (1H, dd, *J* = 8.6, 6.4 Hz, αH-COOH), 3.25-3.21 (1H, m, HNCHHCH<sub>2</sub>CH<sub>2</sub>), 3.19-3.15 (1H, m, HNCHHCH<sub>2</sub>CH<sub>2</sub>), 2.35-2.30 (1H, m, NC(CONH<sub>2</sub>)HCCH<sub>2</sub>CH<sub>2</sub>); *N*-acetylglycinamide, **7** (×) (partial assignment): δ<sub>H</sub> 3.87 (2H, s, CH<sub>2</sub>).

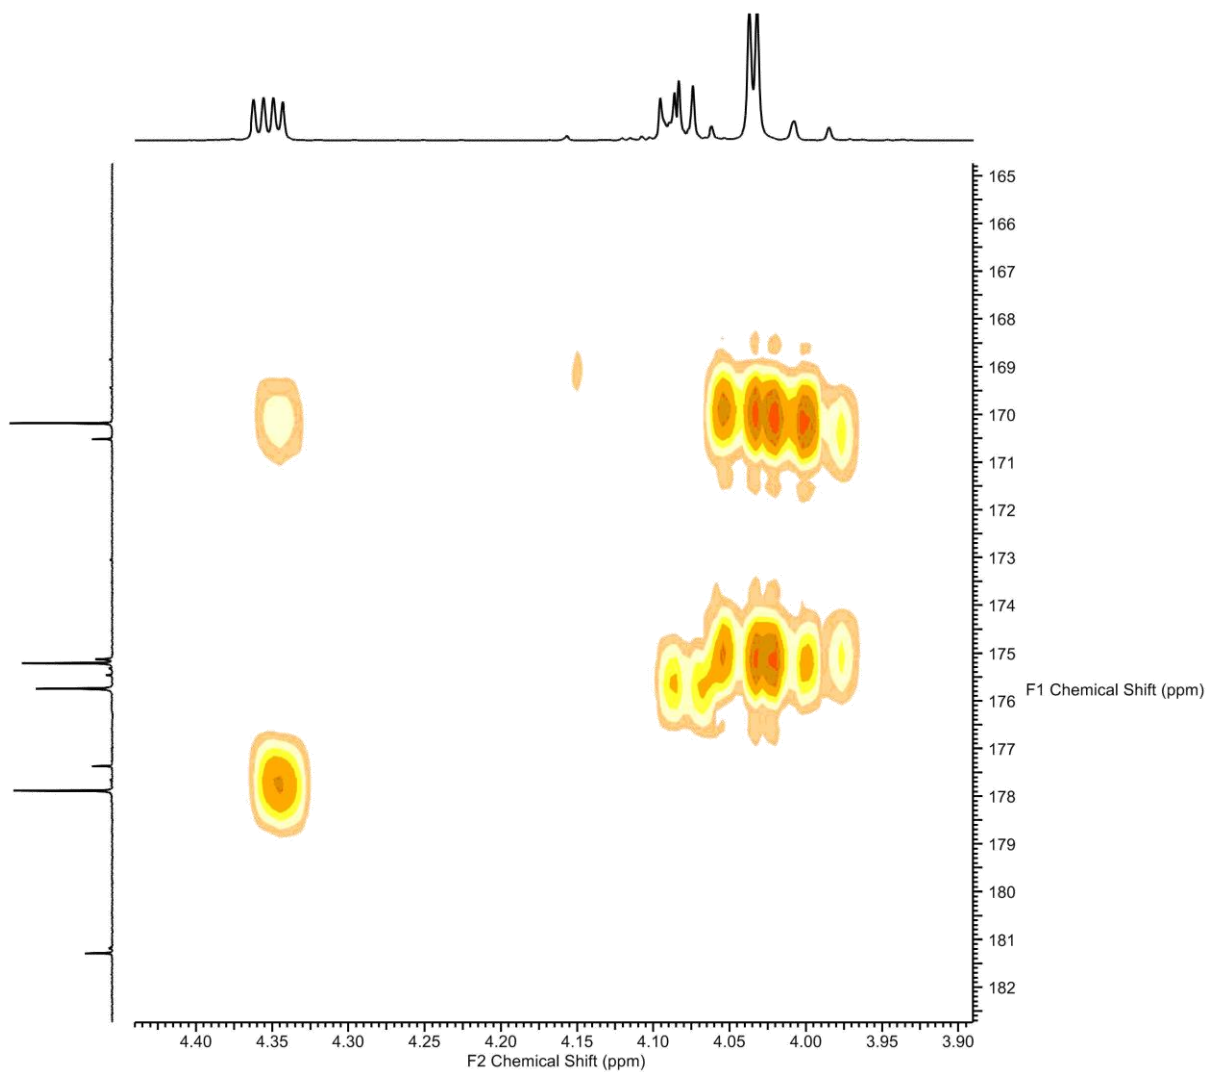

**Figure S87:**  $^1\text{H}$ - $^{13}\text{C}$  HMBC ( $^1\text{H}$ : 700 MHz [3.88-4.50 ppm],  $^{13}\text{C}$ : 176 MHz [165-183 ppm],  $\text{H}_2\text{O}/\text{D}_2\text{O}$  9:1) spectrum showing the diagnostic  $^2J_{\text{CH}}$  coupling of the Gly- $\text{CH}_2$  AB in  $5\text{p}'$  at 4.07 and 4.05 ppm with two resonances at 175.0 and 170.0 ppm, which is characteristic of amide bond formation of Pro.

Coupling of N-acetylglycine nitrile **1** with L-serinamide **2s'** at pH 8.5 and room temperature

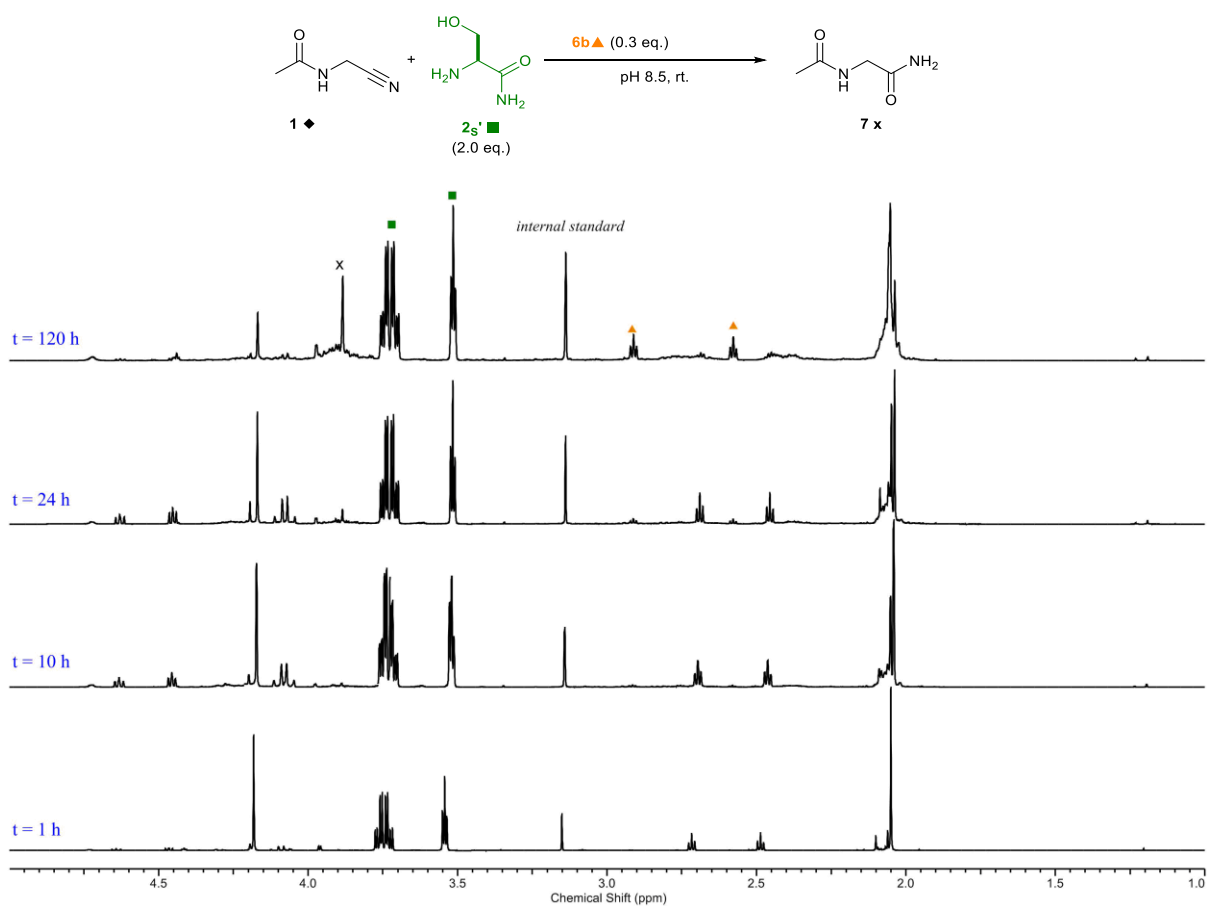

**Figure S88:** <sup>1</sup>H NMR (700 MHz, H<sub>2</sub>O/D<sub>2</sub>O 9:1, noesygppr1d, 1.0-5.0 ppm) spectrum to show the reaction of N-acetyl glycine nitrile (**1**, 200 mM) with L-serinamide (**2s'**, 400 mM) and 3-mercaptopropanoic acid (**6b**, 60 mM) with MSM (7 mM) as an internal standard at pH 8.5 and room temperature.

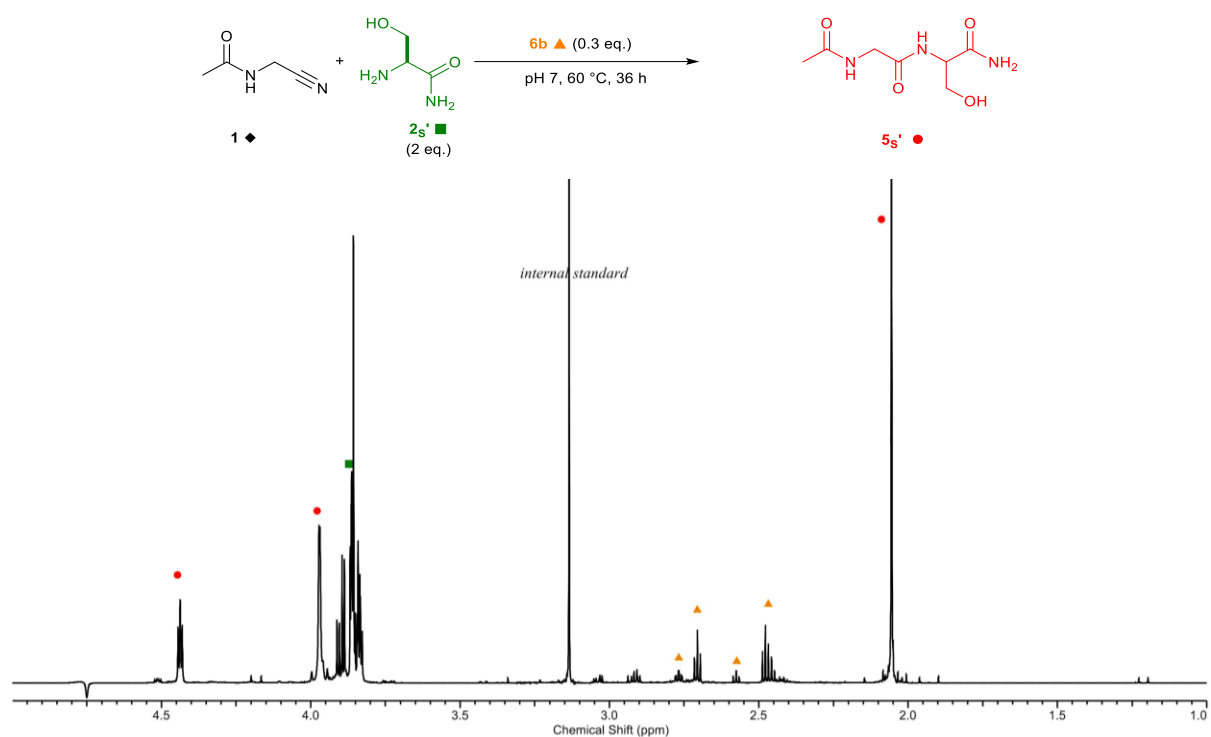

**Figure S89:** <sup>1</sup>H NMR (700 MHz, H<sub>2</sub>O/D<sub>2</sub>O 9:1, noesygppr1d, 1.0-5.0 ppm) spectrum to show the reaction of N-acetyl glycine nitrile (**1**, 200 mM) with L-serinamide (**2s'**, 400 mM) and 3-mercaptopropanoic acid (**6b**, 60 mM) with MSM (60 mM) as an internal standard at pH 7.0 and 60°C.

<sup>1</sup>H NMR (700 MHz, H<sub>2</sub>O/D<sub>2</sub>O 9:1, noesygppr1d) **5s'** (partial assignment) (●): δ<sub>H</sub> 4.44 (1H, app. t, *J* = 4.9 Hz, Ser-αH-CONH<sub>2</sub>), 3.98 (1H, AB, *J* = 17.4 Hz, AcNHCH<sub>2</sub>H), 3.96 (1H, AB, *J* = 17.4 Hz, AcNHCH<sub>2</sub>H), 2.06 (3H, s, H<sub>3</sub>C(CO)).

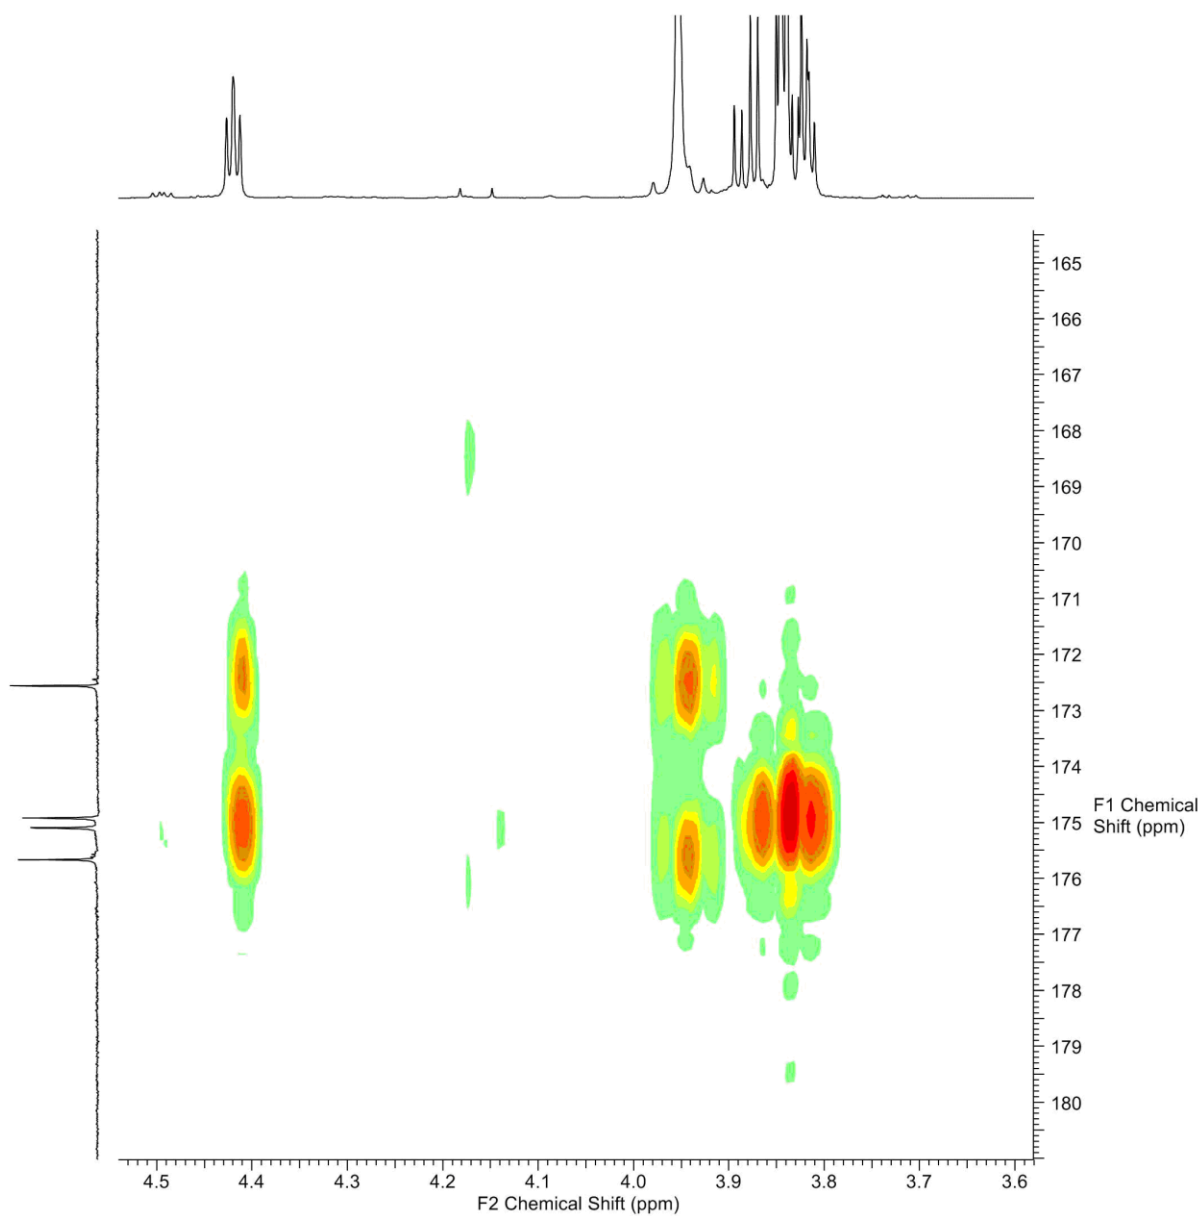

**Figure S90:**  $^1\text{H}$ - $^{13}\text{C}$  HMBC ( $^1\text{H}$ : 700 MHz [3.5–4.5 ppm],  $^{13}\text{C}$ : 176 MHz [150–185 ppm],  $\text{H}_2\text{O}/\text{D}_2\text{O}$  9:1) spectrum showing the diagnostic  $^2\text{J}_{\text{CH}}$  and  $^3\text{J}_{\text{CH}}$  coupling of the Ser- $\alpha\text{H}$  in  $5\text{s}'$  at 4.44 ppm with two resonances at 175.2 and 172.6 ppm which is characteristic of amide bond formation.

Coupling of *N*-acetylglycine nitrile **1** with *L*-tryptophan amide **2w'** at pH 8.5 and room temperature

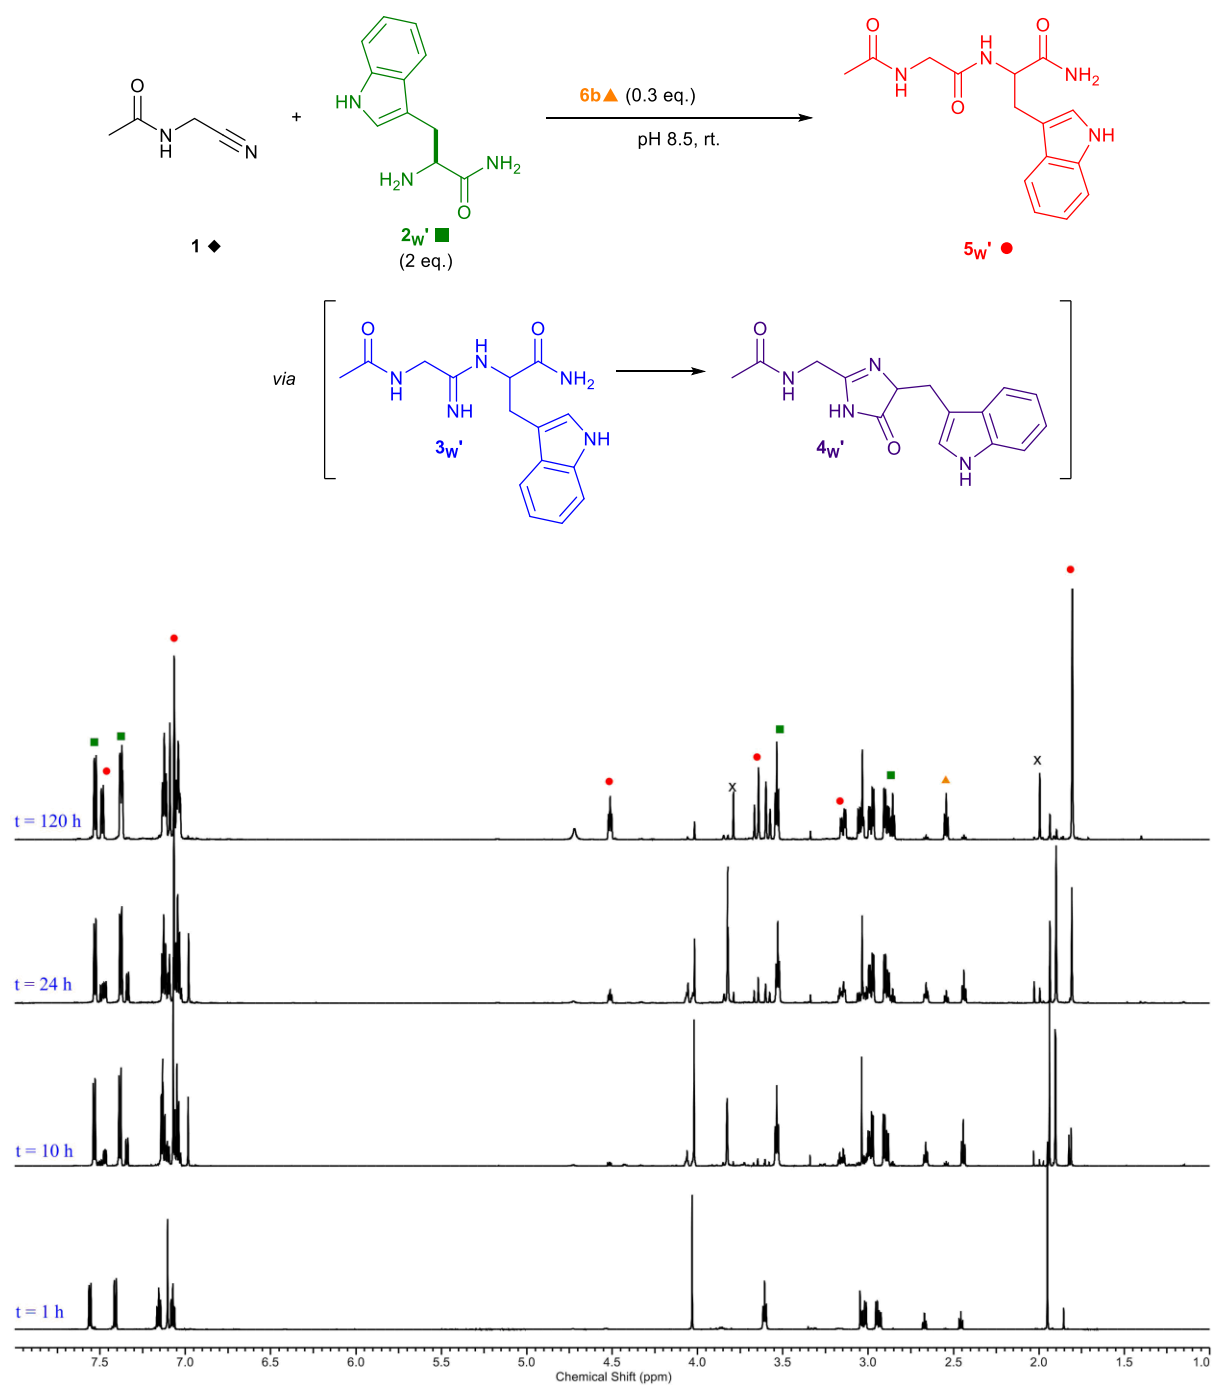

**Figure S91:** <sup>1</sup>H NMR (700 MHz, H<sub>2</sub>O/D<sub>2</sub>O 9:1, noesygppr1d, 1.0-8.0 ppm) spectrum to show the reaction of *N*-acetyl glycine nitrile (**1**, 200 mM) with *L*-tryptophan amide (**Trp**, 200 mM) and 3-Mercaptopropanoic acid (MPA, 60 mM) with MSM (7 mM) as an internal standard at pH 8.5 and room temperature.

<sup>1</sup>H NMR (700 MHz, H<sub>2</sub>O/D<sub>2</sub>O 9:1, noesygppr1d) **5w'** (partial assignment) (●): δ<sub>H</sub> 7.52 (1H, d, *J* = 8.1 Hz, ArH), 7.12 (1H, s, ArH), 4.54 (1H, app. t, *J* = 6.8 Hz, Trp-αH-COOH), 3.67 (1H, AB, *J* = 16.9 Hz, AcNHCHH), 3.62 (1H, AB, *J* = 16.9 Hz, AcNHCHH), 3.17 (1H, ABX, *J* = 14.8, 5.8 Hz, CHCHHAr), 3.07 (1H, ABX, *J* = 14.8, 7.9 Hz, CHCHHAr), 1.83 (3H, s, H<sub>3</sub>C(CO)); *L*-tryptophan amide **2w'** (partial assignment) (■): δ<sub>H</sub> 7.55 (1H, d, *J* = 7.9 Hz, ArH), 7.09 (1H, s, ArH), 3.56 (1H, app. t, *J* = 6.6 Hz αH-COOH), 3.01 (1H, ABX, *J* = 14.4, 6.3 Hz, CHCHHAr), 2.92 (1H, ABX, *J* = 14.4, 6.8 Hz, CHCHHAr); *N*-Acetylglycinamide, **7** (×) δ<sub>H</sub> 3.82 (2H, s, CH<sub>2</sub>), 2.02 (3H, s, H<sub>3</sub>C(CO)).

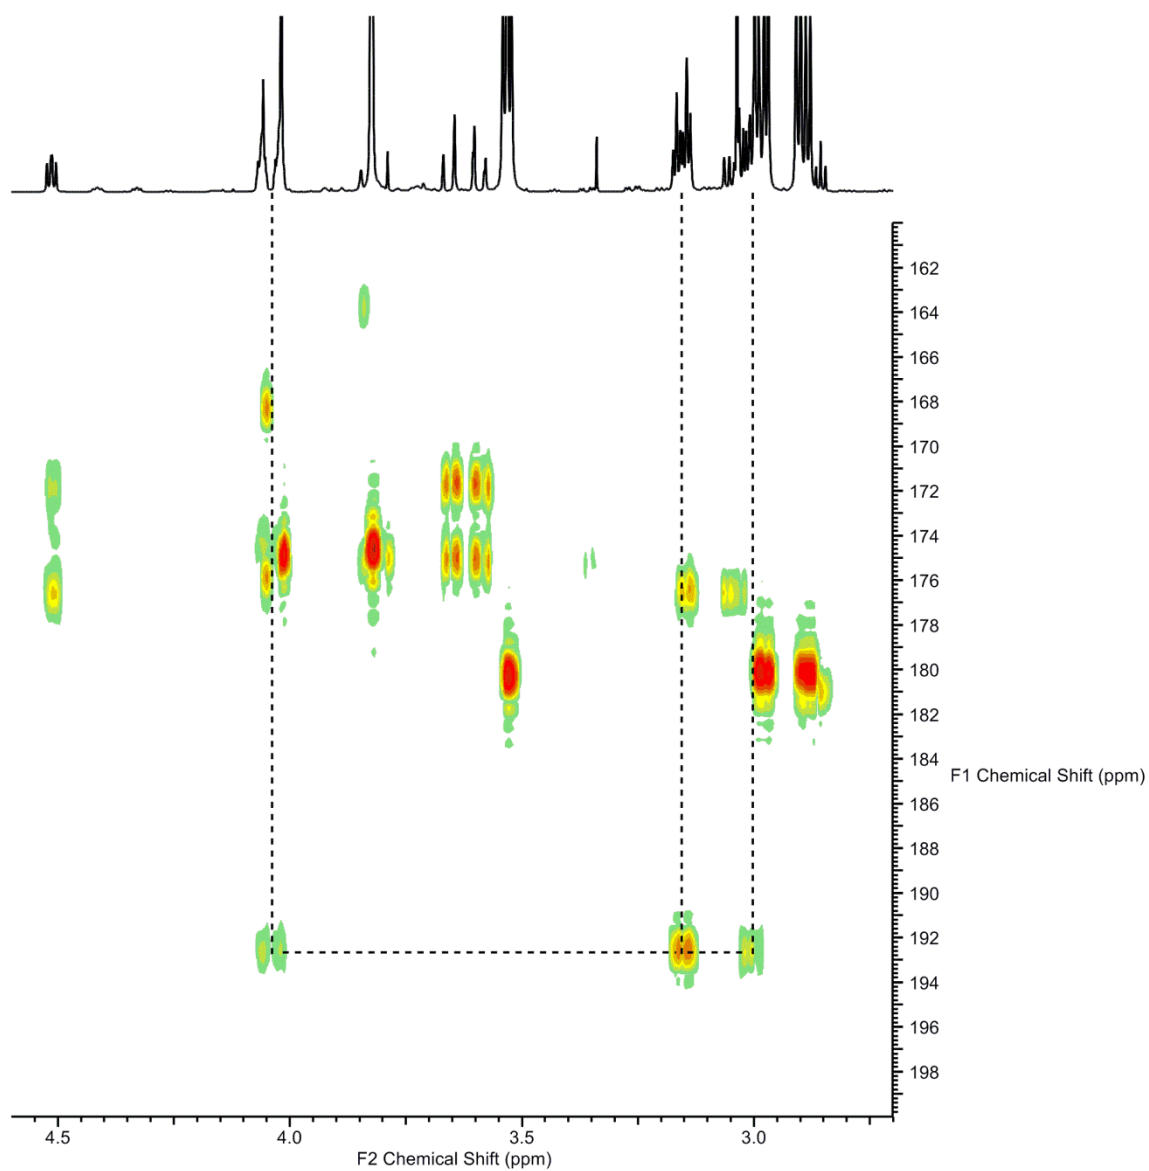

**Figure S92:**  $^1\text{H}$ - $^{13}\text{C}$  HMBC ( $^1\text{H}$ : 700 MHz [2.7-4.6 ppm],  $^{13}\text{C}$ : 176 MHz [160-200 ppm],  $\text{H}_2\text{O}/\text{D}_2\text{O}$  9:1) spectrum for the coupling of **1** and **2w'** catalyzed by 3-mercaptopropionic acid (**6b**) at pH 8.5 after 24 h, showing the diagnostic coupling of the imidazolone amide signal in **4w** at 192.4 ppm with signals at 4.00 ppm (**Trp**- $\alpha\text{H}$ ,  $^2\text{J}_{\text{CH}}$ ), 3.15 and 3.00 ppm (**Trp**- $\beta\text{H}$ ,  $^3\text{J}_{\text{CH}}$ ), which is characteristic of imidazolone formation.

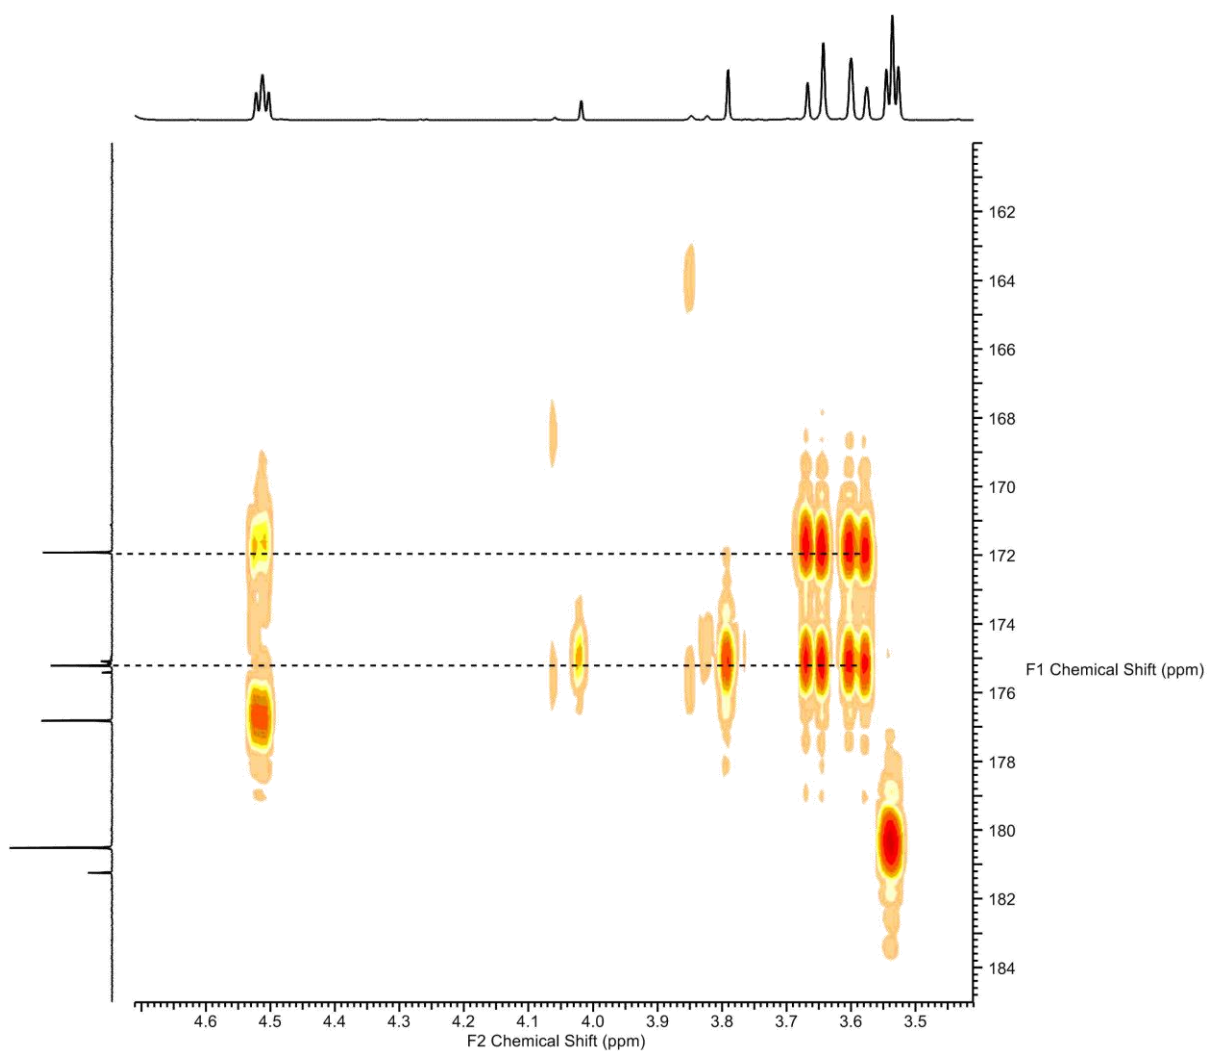

**Figure S93:**  $^1\text{H}$ - $^{13}\text{C}$  HMBC ( $^1\text{H}$ : 700 MHz [3.4–4.7 ppm],  $^{13}\text{C}$ : 176 MHz [160–185 ppm],  $\text{H}_2\text{O}/\text{D}_2\text{O}$  9:1) spectrum showing the diagnostic  $^2\text{J}_{\text{CH}}$  and  $^3\text{J}_{\text{CH}}$  coupling of the diastereotopic glycol AB in **5w'** at 3.67 and 3.62 ppm with two resonances at 175.2 and 172.0 ppm, which is characteristic of amide bond formation.



Coupling of *N*-acetylglycine nitrile **1** with *L*-tyrosinamide **2Y'** at pH 8.5 and room temperature

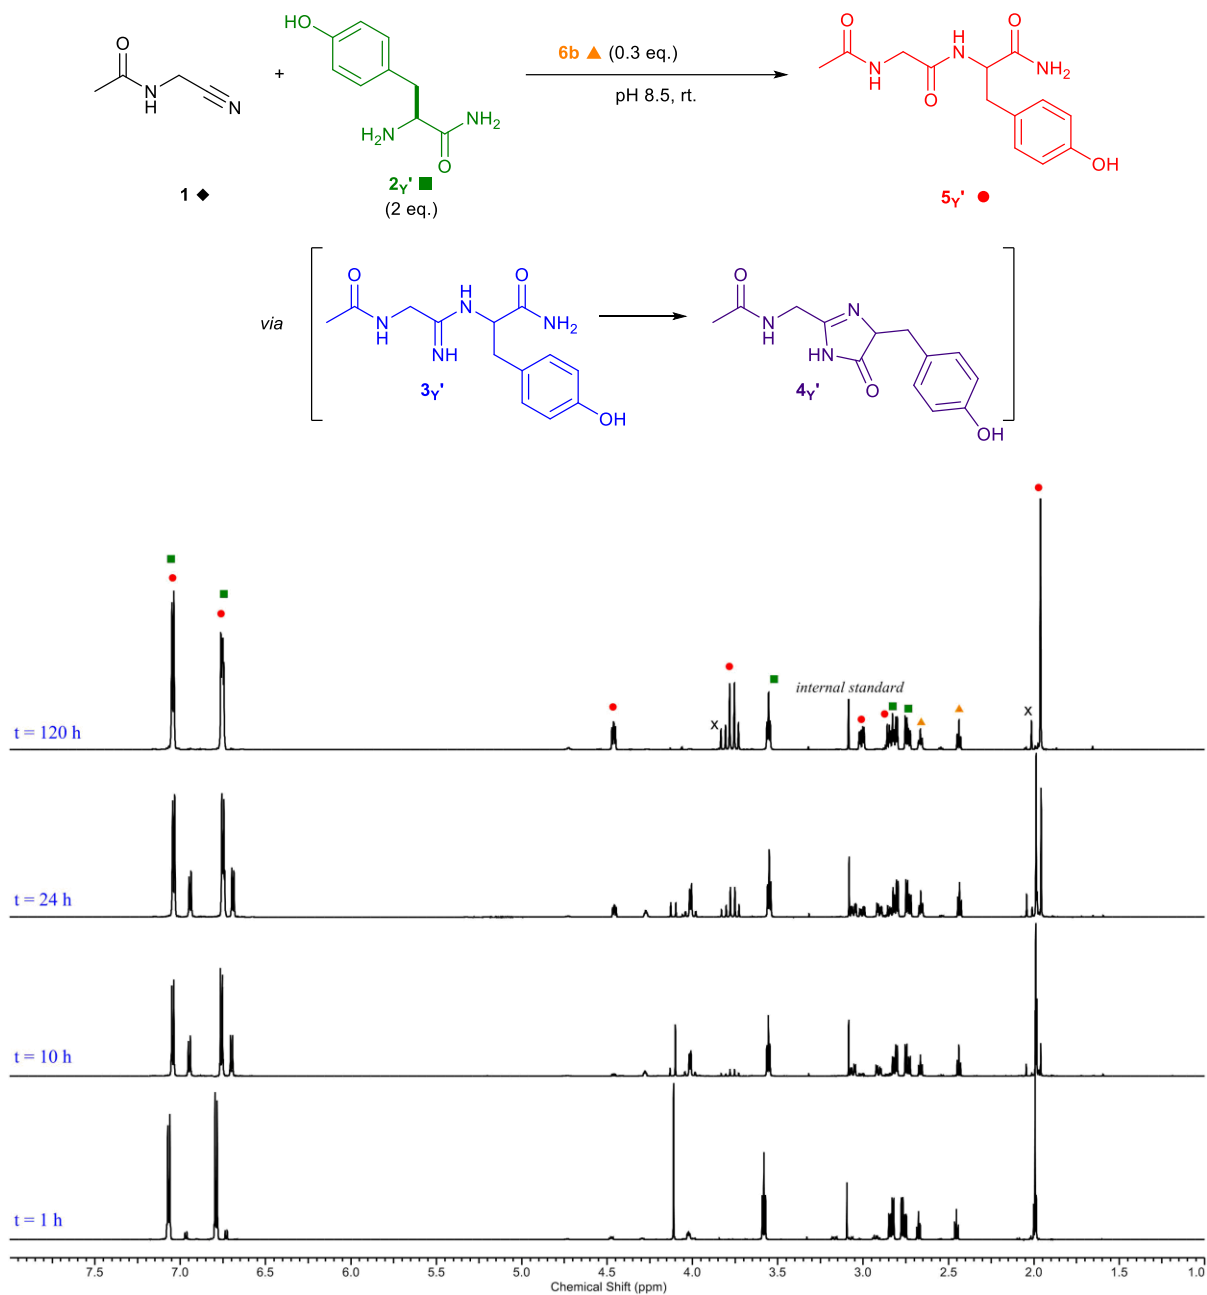

**Figure S94:** <sup>1</sup>H NMR (700 MHz, H<sub>2</sub>O/D<sub>2</sub>O 9:1, noesygppr1d, 1.0-8.0 ppm) spectrum to show the reaction of *N*-acetyl glycine nitrile (**1**, 200 mM) with *L*-tyrosinamide (**2Y'** 200 mM) and 3-Mercaptopropanoic acid (MPA, 60 mM) with MSM (7 mM) as an internal standard at pH 8.5 and room temperature.

<sup>1</sup>H NMR (700 MHz, H<sub>2</sub>O/D<sub>2</sub>O 9:1, noesygppr1d) **5Y'** (partial assignment) (●): δ<sub>H</sub> 4.49 (1H, dd, J = 7.9, 6.3 Hz, Tyr-αH-CONH<sub>2</sub>), 3.82 (1H, AB, J = 16.8 Hz AcNHCHH), 3.77 (1H, AB, J = 16.9 Hz AcNHCHH), 3.04 (1H, ABX, J = 14.1, 5.8 Hz, CHCHHAr), 1.99 (3H, s, H<sub>3</sub>C(CO)); *L*-tyrosinamide, **2Y'** (partial assignment) (■): δ<sub>H</sub> 3.58 (1H, app. t, J = 6.7 Hz αH-COOH), 2.76 (1H, ABX, J = 13.9, 7.0 Hz, CHCHHAr); *N*-acetylglycinamide, **7** (×) δ<sub>H</sub> 3.86 (2H, s, CH<sub>2</sub>), 2.04 (3H, s, H<sub>3</sub>C(CO)).

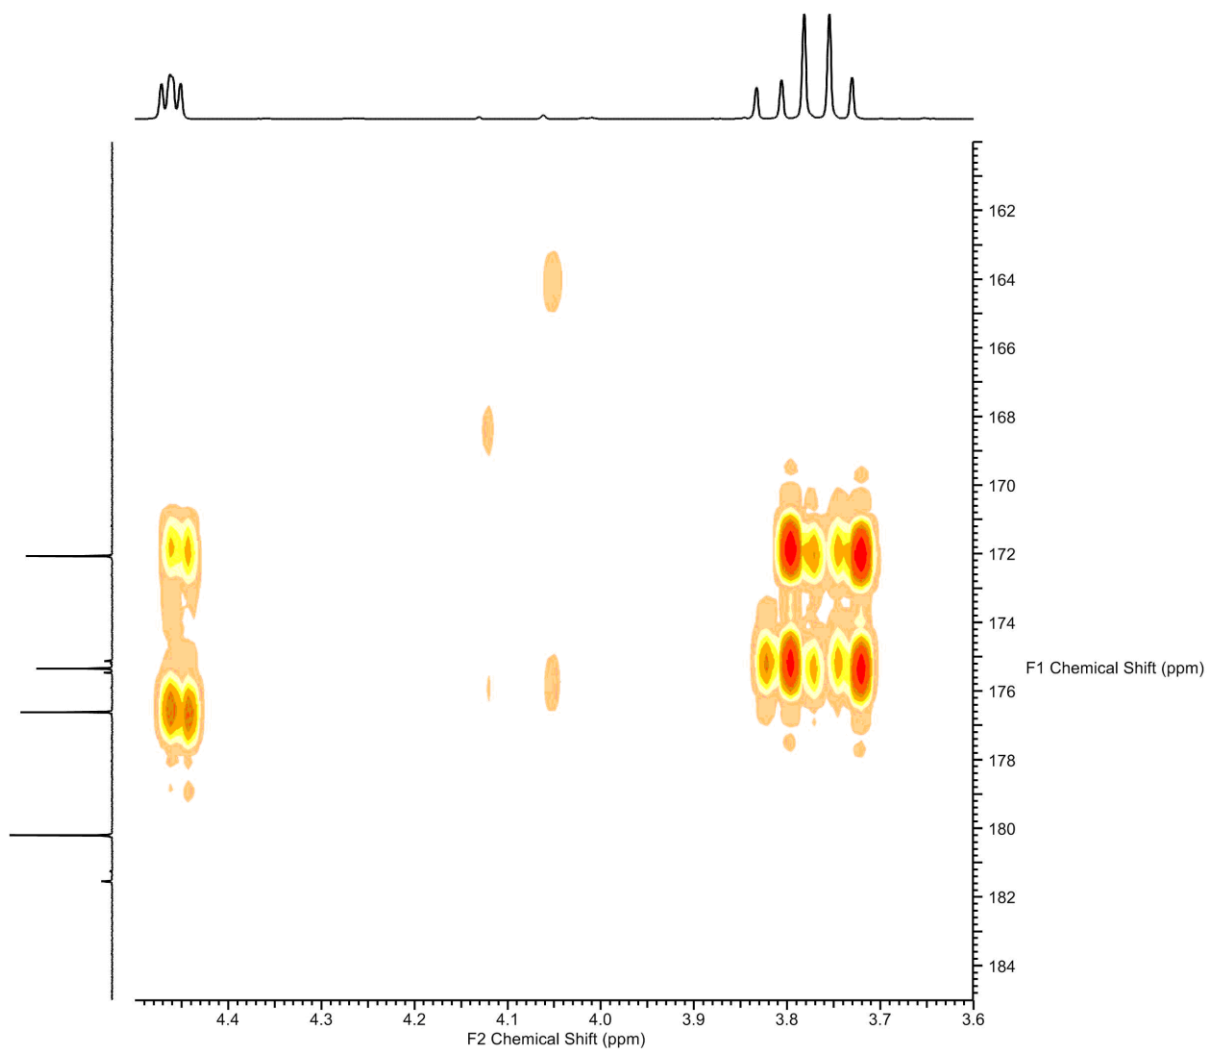

**Figure S95:**  $^1\text{H}$ - $^{13}\text{C}$  HMBC ( $^1\text{H}$ : 700 MHz [3.6–4.5 ppm],  $^{13}\text{C}$ : 176 MHz [160–185 ppm],  $\text{H}_2\text{O}/\text{D}_2\text{O}$  9:1) spectrum showing the diagnostic  $^2J_{\text{CH}}$  and  $^3J_{\text{CH}}$  coupling of the diastereotopic glycol AB in **5y'** at 3.82 and 3.77 ppm with two resonances at 175.2 and 172.0 ppm, which is characteristic of amide bond formation.

Coupling of N-acetylglycine nitrile **1** with L-threoninamide **2<sub>T</sub>'** at pH 8.5 and room temperature

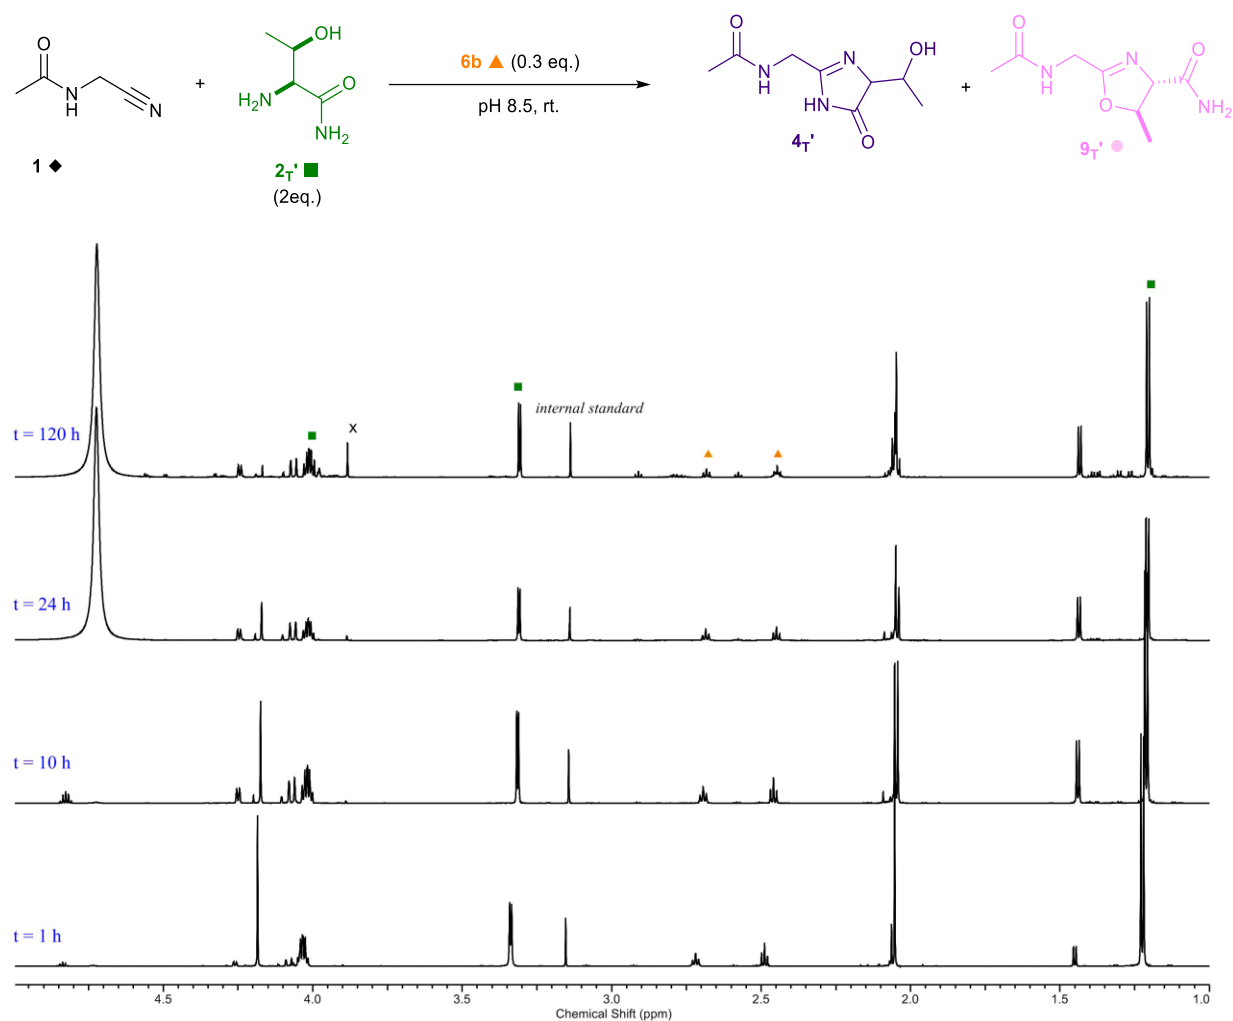

**Figure S96:** <sup>1</sup>H NMR (700 MHz, H<sub>2</sub>O/D<sub>2</sub>O 9:1, noesygppr1d, 1.0–4.7 ppm) spectrum to show the reaction of N-acetyl glycine nitrile (**1**, 200 mM) with L-threoninamide (**2<sub>T</sub>'**, 240 mM) and 3-Mercaptopropanoic acid (**6b**, 60 mM) with MSM (7 mM) as an internal standard at pH 8.5 and room temperature.

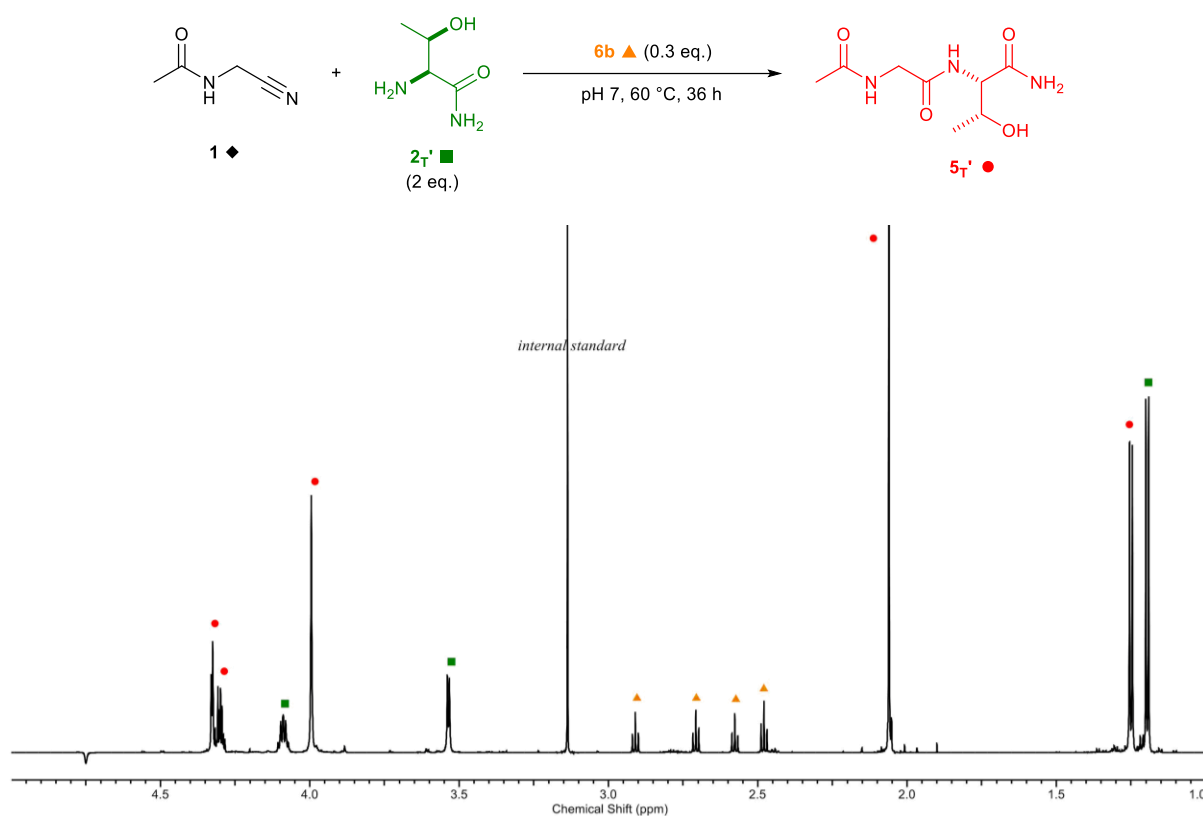

**Figure S97:** <sup>1</sup>H NMR (700 MHz, H<sub>2</sub>O/D<sub>2</sub>O 9:1, noesygppr1d, 1.0-5.0 ppm) spectrum to show the reaction of N-acetyl glycine nitrile (**1**, 200 mM) with L-threoninamide (**2<sub>s'</sub>**, 400 mM) and 3-mercaptopropanoic acid (**6b**, 60 mM) with MSM (60 mM) as an internal standard at pH 7.0 and 60 °C.

<sup>1</sup>H NMR (700 MHz, H<sub>2</sub>O/D<sub>2</sub>O 9:1, noesygppr1d) **5<sub>T'</sub>** (●): δ<sub>H</sub> 4.34-4.28 (2H, m, Thr-**αH**-CONH<sub>2</sub> + HOCHCH<sub>3</sub>), 4.00 (2H, s, AcNHCH<sub>2</sub>), 2.06 (3H, s, H<sub>3</sub>C(CO)), 1.25 (3H, d, *J* = 6.3 Hz, HOCHCH<sub>3</sub>); L-threoninamide, **2<sub>T'</sub>** (■): δ<sub>H</sub> 4.09 (1H, m, HOCHCH<sub>3</sub>), 3.54 (1H, d, *J* = 4.9 Hz, αH-COOH), 1.20 (3H, d, *J* = 6.3 Hz, HOCHCH<sub>3</sub>).

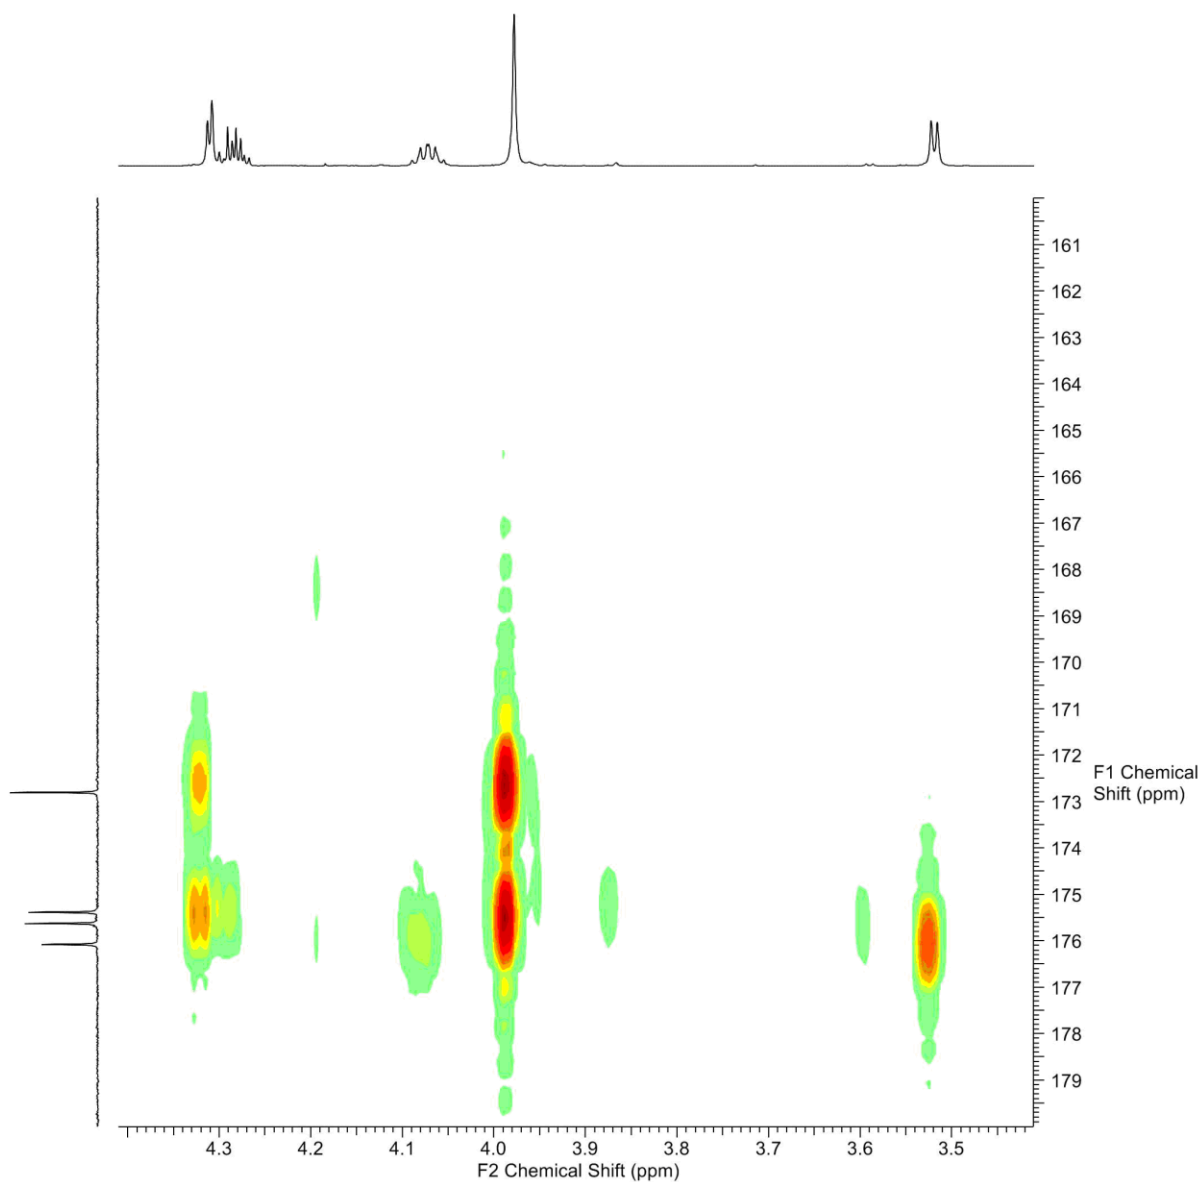

**Figure S98:** <sup>1</sup>H-<sup>13</sup>C HMBC (<sup>1</sup>H: 700 MHz [3.4-4.4 ppm], <sup>13</sup>C: 176 MHz [160-180 ppm], H<sub>2</sub>O/D<sub>2</sub>O 9:1) spectrum showing the diagnostic <sup>2</sup>J<sub>CH</sub> and <sup>3</sup>J<sub>CH</sub> coupling of the **Thr-αH** in **5r'** at 4.32 ppm with two resonances at 175.6 and 172.6 ppm, which is characteristic of amide bond formation.

Coupling of *N*-acetylglycine nitrile **1** with *L*-valinamide **2v'** at pH 8.5 and room temperature

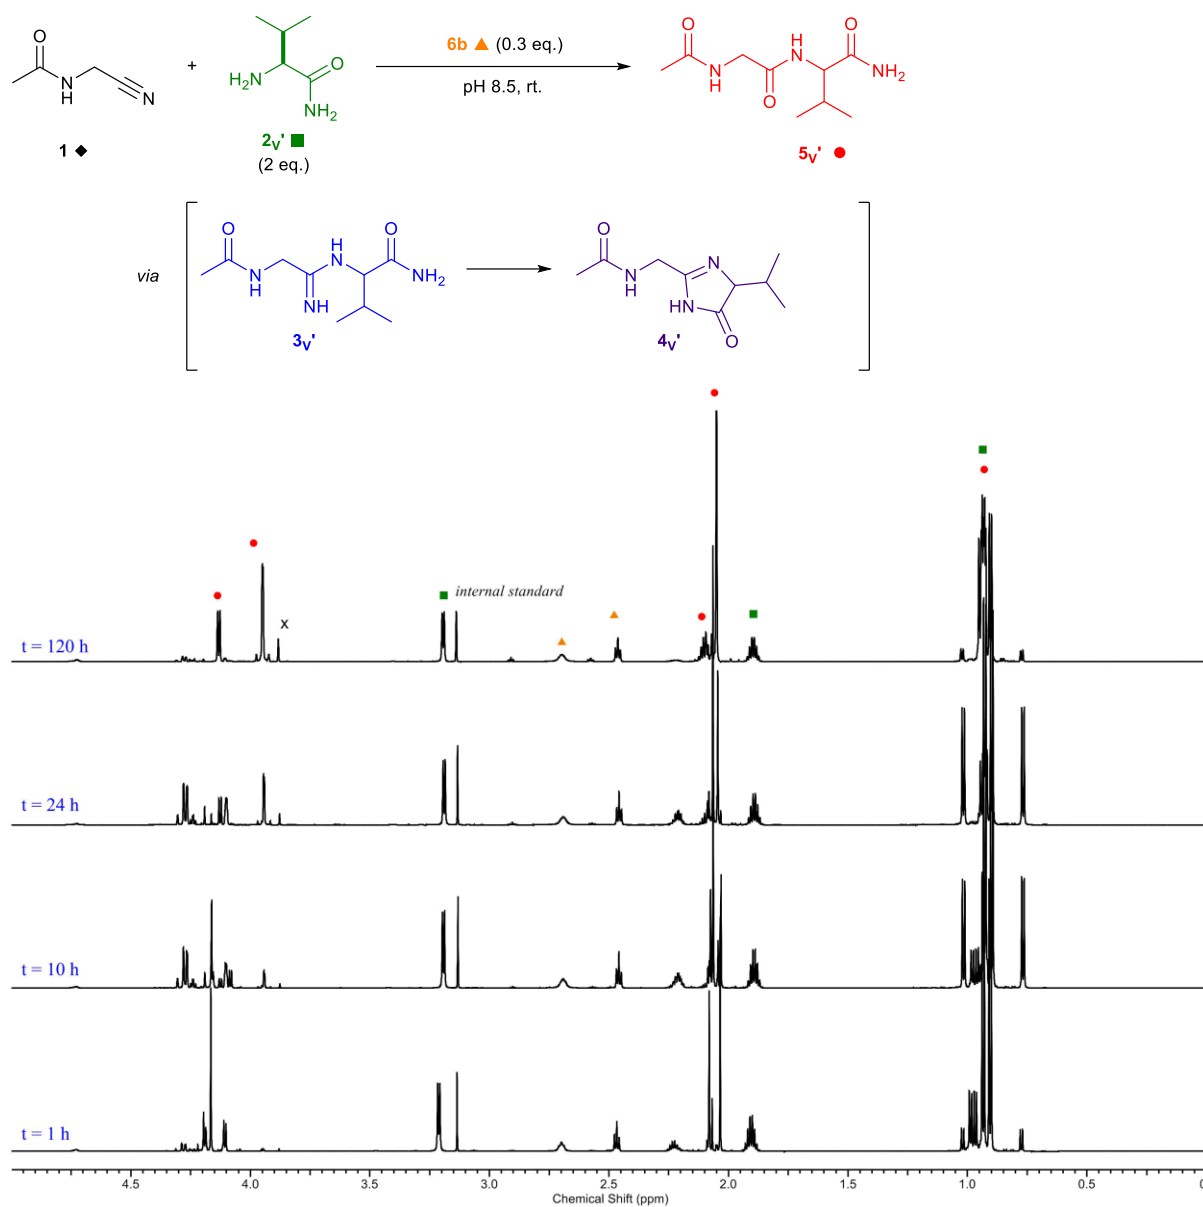

**Figure S99:** <sup>1</sup>H NMR (700 MHz, H<sub>2</sub>O/D<sub>2</sub>O 9:1, noesygppr1d, 0.0–5.0 ppm) spectrum to show the reaction of *N*-acetyl glycine nitrile (**1**, 200 mM) with *L*-valinamide (**2v'**, 400 mM) and 3-mercaptopropanoic acid (**6b**, 60 mM) with MSM (7 mM) as an internal standard at pH 8.5 and room temperature.

<sup>1</sup>H NMR (700 MHz, H<sub>2</sub>O/D<sub>2</sub>O 9:1, noesygppr1d) **5v'** (partial assignment) (●): δ<sub>H</sub> 4.16 (1H, d, *J* = 6.7 Hz, Val- $\alpha$ H-CONH<sub>2</sub>), 3.98 (1H, AB, *J* = 17.2 Hz, AcNHCHH), 3.97 (1H, AB, *J* = 17.2 Hz, AcNHCHH), 2.15–2.10 (1H, m, H<sub>3</sub>CC $\dot{H}$ CH<sub>3</sub>), 2.07 (3H, s, H<sub>3</sub>C(CO)); *L*-valinamide, **2v'** (■): δ<sub>H</sub> 3.22 (1H, d, *J* = 6.1 Hz,  $\alpha$ H-CONH<sub>2</sub>), 1.92 (1H, app. octet, *J* = 6.7 Hz, H<sub>3</sub>CC $\dot{H}$ CH<sub>3</sub>); *N*-acetylglycinamide, **7** (✕) (partial assignment): δ<sub>H</sub> 3.91 (2H, s, CH<sub>2</sub>)

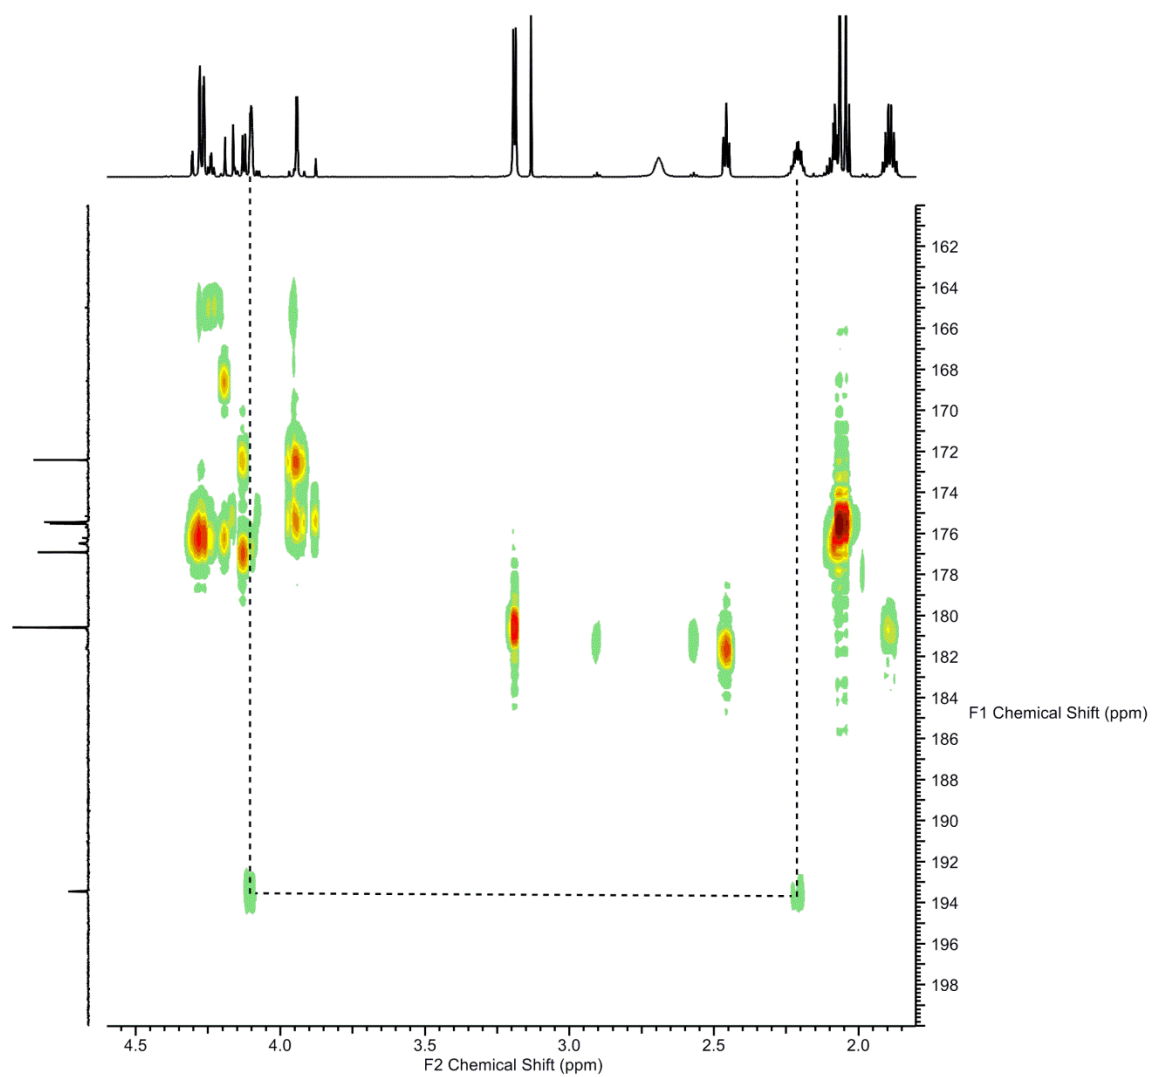

**Figure S100:**  $^1\text{H}$ - $^{13}\text{C}$  HMBC ( $^1\text{H}$ : 700 MHz [1.4-4.6 ppm],  $^{13}\text{C}$ : 176 MHz [160-200 ppm],  $\text{H}_2\text{O}/\text{D}_2\text{O}$  9:1) spectrum for the coupling of **1** and **2v'** catalyzed by 3-mercaptopropionic acid (**6b**) at pH 8.5 after 24 h, showing the diagnostic coupling of the imidazolone amide signal in **4v** at 193.4 ppm with signals at 4.10 ppm (**Val**- $\alpha\text{H}$ ,  $^2\text{J}_{\text{CH}}$ ), 2.22 ppm (**Val**- $\beta\text{H}$ ,  $^3\text{J}_{\text{CH}}$ ), which is characteristic of imidazolone formation.

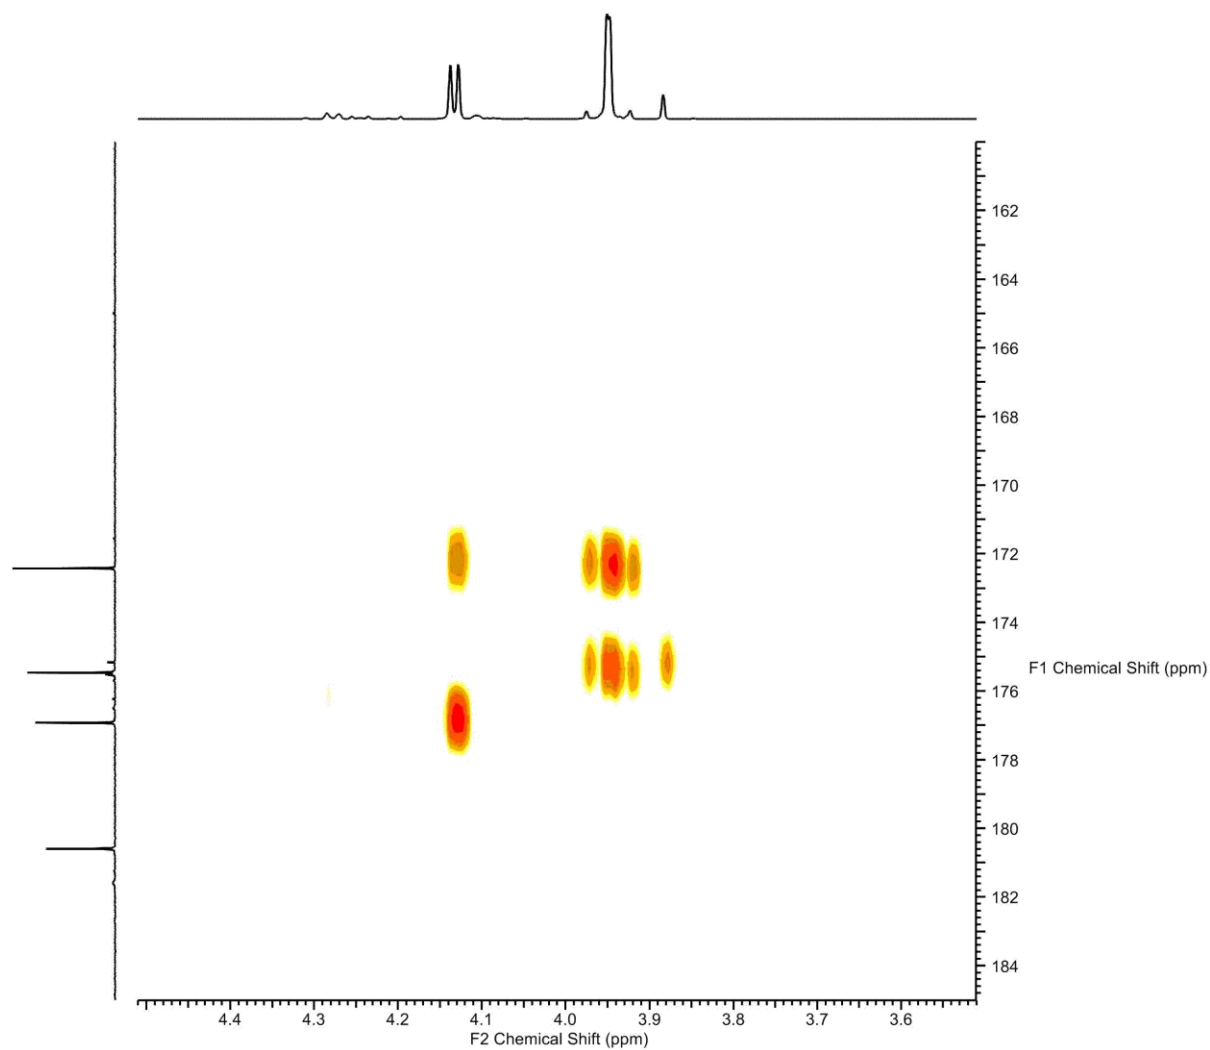

**Figure S101:**  $^1\text{H}$ - $^{13}\text{C}$  HMBC ( $^1\text{H}$ : 700 MHz [3.2–4.5 ppm],  $^{13}\text{C}$ : 176 MHz [150–185 ppm],  $\text{H}_2\text{O}/\text{D}_2\text{O}$  9:1) spectrum showing the diagnostic  $^2J_{\text{CH}}$  and  $^3J_{\text{CH}}$  coupling of the Val- $\alpha\text{H}$  in **5v** at 4.16 ppm with two resonances at 177.2 and 172.6 ppm, which is characteristic of amide bond formation.



Coupling of **1** with peptide fragments catalyzed by **6b**

Coupling of **1** with L-alanyl-glycyl-L-alanine **2<sub>AGA</sub>**

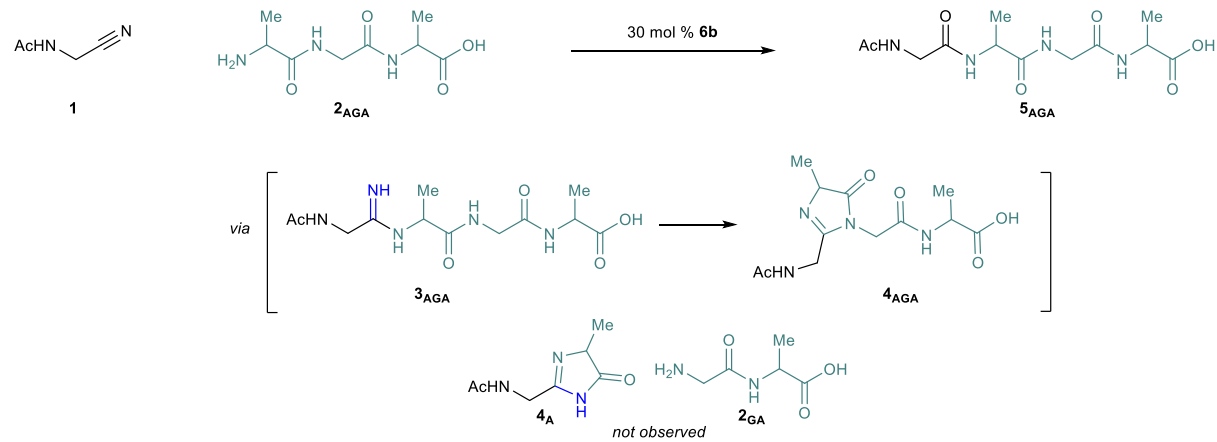

| Entry | pH  | temperature / °C | reaction time / h | <b>4<sub>AGA</sub></b> / % | <b>5<sub>AGA</sub></b> / % |
|-------|-----|------------------|-------------------|----------------------------|----------------------------|
| 1     | 8.5 | 20               | 12                | 38                         | trace                      |
| 2     | 8.5 | 20               | 144               | 12                         | 34                         |
| 3     | 8.5 | 60               | 28                | 0                          | 50                         |
| 4     | 7.0 | 60               | 96                | 0                          | 81                         |

**Table S21:** Thiol-catalyzed ligation of **1** with Ala-Gly-Ala **2<sub>AGA</sub>**.

| Entry | pH  | buffer     | temperature / °C | Time     | <b>12</b> / % | <b>7</b> / % | <b>5<sub>AGA</sub></b> / % |
|-------|-----|------------|------------------|----------|---------------|--------------|----------------------------|
| 1     | 7   | no buffer  | 60               | 96 hour  | 5             | 14           | 81                         |
| 2     | 7   | no buffer  | 20               | 20 days  | 5             | 12           | 78                         |
| 3     | 8.5 | no buffer  | 60               | 28 hours | overlapped    | 30           | 50                         |
| 4     | 8.5 | 1 M borate | 20               | 30 days  | overlapped    | 25           | 64                         |

**Table S22:** Thiol-catalyzed ligation of **1** with Ala-Gly-Ala **2<sub>AGA</sub>** at pH 7 and 8.5 at different temperature.

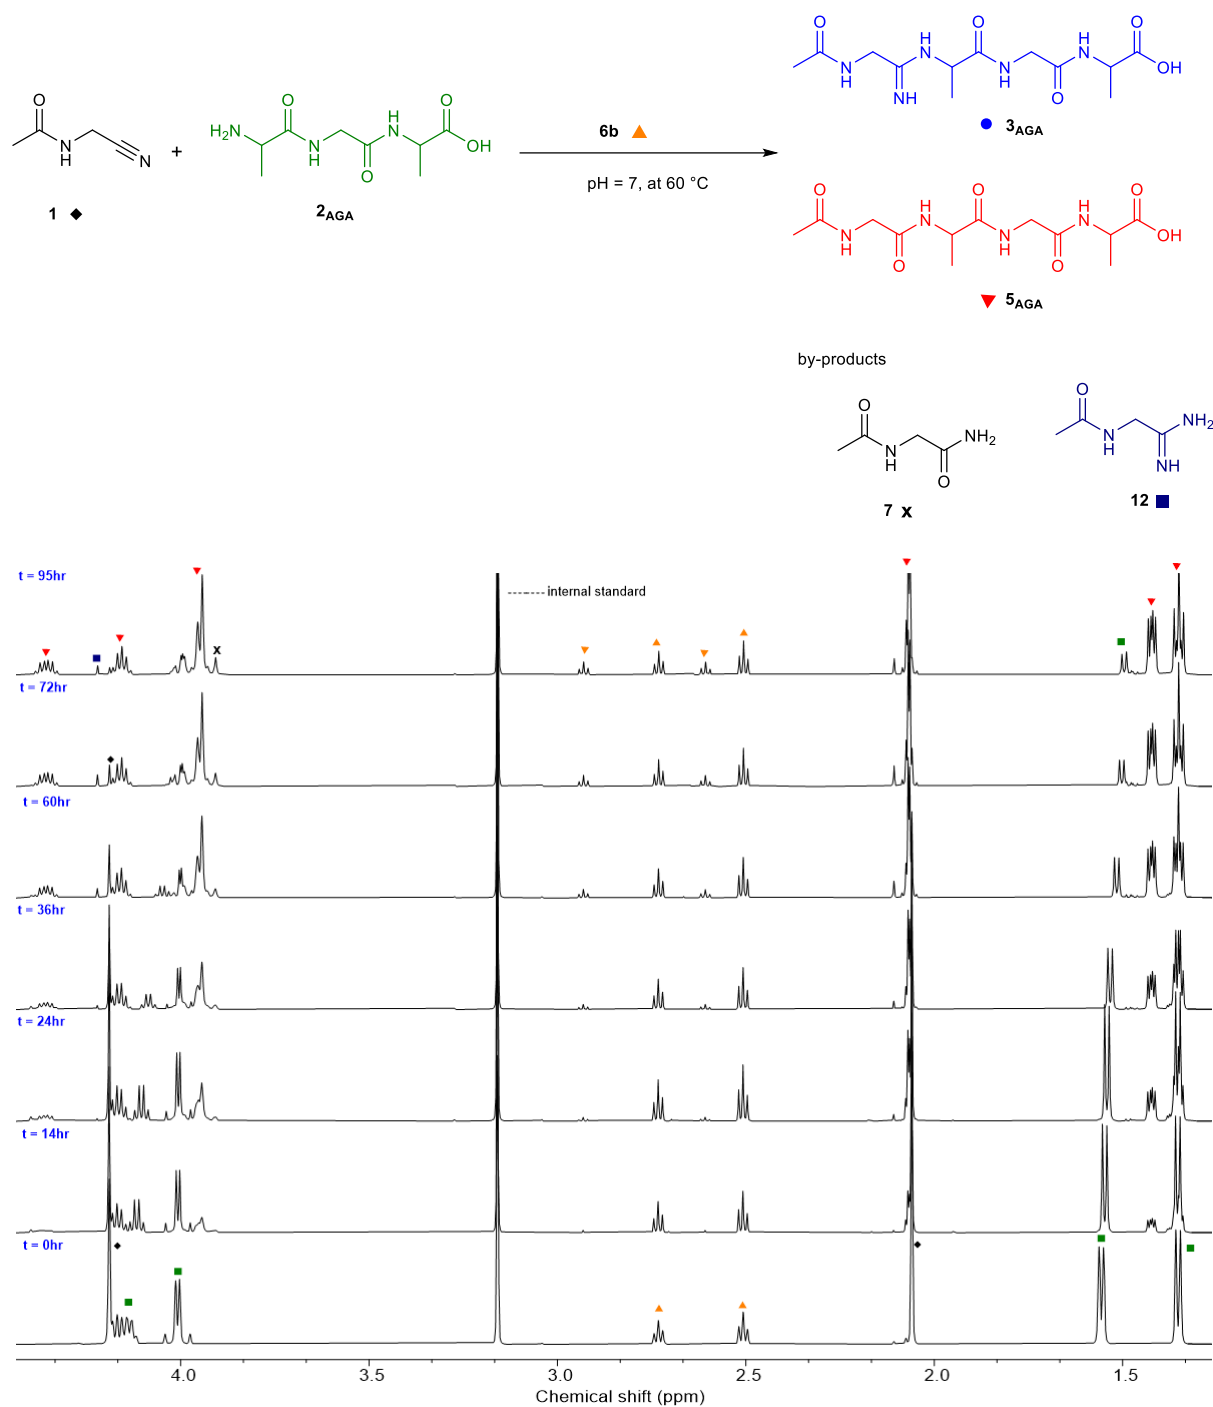

**Figure S102:** <sup>1</sup>H NMR (600 MHz, H<sub>2</sub>O/D<sub>2</sub>O 9:1, noesyppr1d, 1.0-5.0 ppm) spectrum to show the reaction of N-acetyl glycine nitrile (**1**; 100 mM), L-alanyl-glycyl-L-alanine (**2<sub>AGA</sub>**; 100 mM) and 3-mercaptopropionic acid (**6b**; 60 mM) with MSM (100 mM) as an internal standard in H<sub>2</sub>O (1 mL) at pH 7 at 60°C.

*N*-Acetylglycyl-DL-alanyl-glycyl-DL-alanine, **5<sub>AGA</sub>** (2 diastereoisomers) ( $\blacktriangledown$ ): <sup>1</sup>H NMR (600 MHz, H<sub>2</sub>O)  $\delta$  4.35 - 4.28 (m, 1H, Ala-(C2)-H), 4.15 - 4.08 (m, 1H, Ala-(C2)-H), 3.98 - 3.93 (m, 4H, 2  $\times$  Gly-(C2)-H), 2.03 (s, 3H, COCH<sub>3</sub>), 1.38 - 1.35 (m, 3H, Ala-(C3)-H<sub>3</sub>), 1.31 - 1.29 (m, 3H, Ala-(C3)-H<sub>3</sub>); *N*-acetylglycinamide, **7** ( $\times$ ) (partial assignment):  $\delta$ <sub>H</sub> 3.91 (2H, s, CH<sub>2</sub>), 2.10 (3H, s, CH<sub>3</sub>), **12** ( $\blacksquare$ ):  $\delta$ <sub>H</sub> 4.21 (2H, s, AcNHCH<sub>2</sub>)

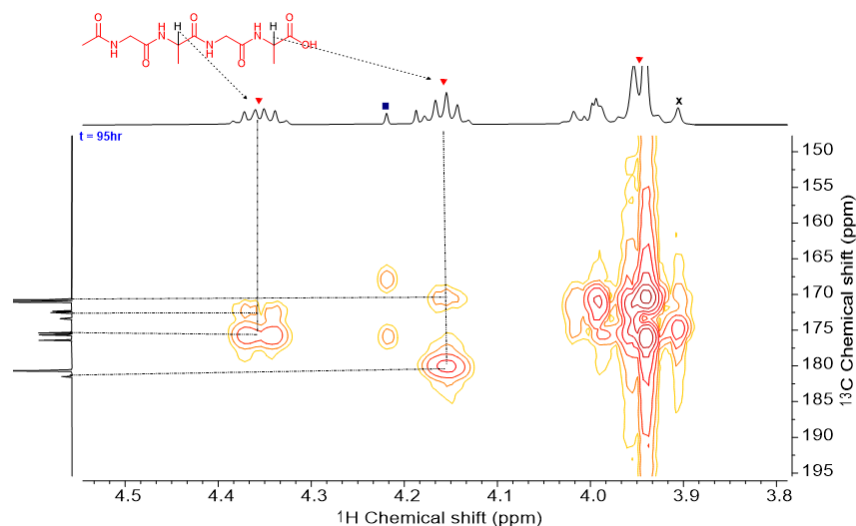

**Figure S103:**  $^1\text{H}$ - $^{13}\text{C}$  HMBC ( $^1\text{H}$ : 600 MHz [3.80–4.40 ppm],  $^{13}\text{C}$ : 176 MHz [160–185 ppm]) spectrum showing the diagnostic  $^2\text{J}_{\text{CH}}$  and  $^3\text{J}_{\text{CH}}$  coupling of  $\text{Ala}_2$ -(C2)-H and  $\text{Ala}_4$ -(C2)-H in a diastereoisomeric mixture of  $5_{\text{AGA}}$  ( $\alpha_{\text{H}} = 4.31$  ppm,  $\delta_{\text{C}} = 175.8, 175.61, 172.7, 171.2$ ;  $\alpha_{\text{H}} = 4.15$  ppm,  $\delta_{\text{C}} 170.7$  ( $\times 2$ ), 179.9, 180.4 ppm).

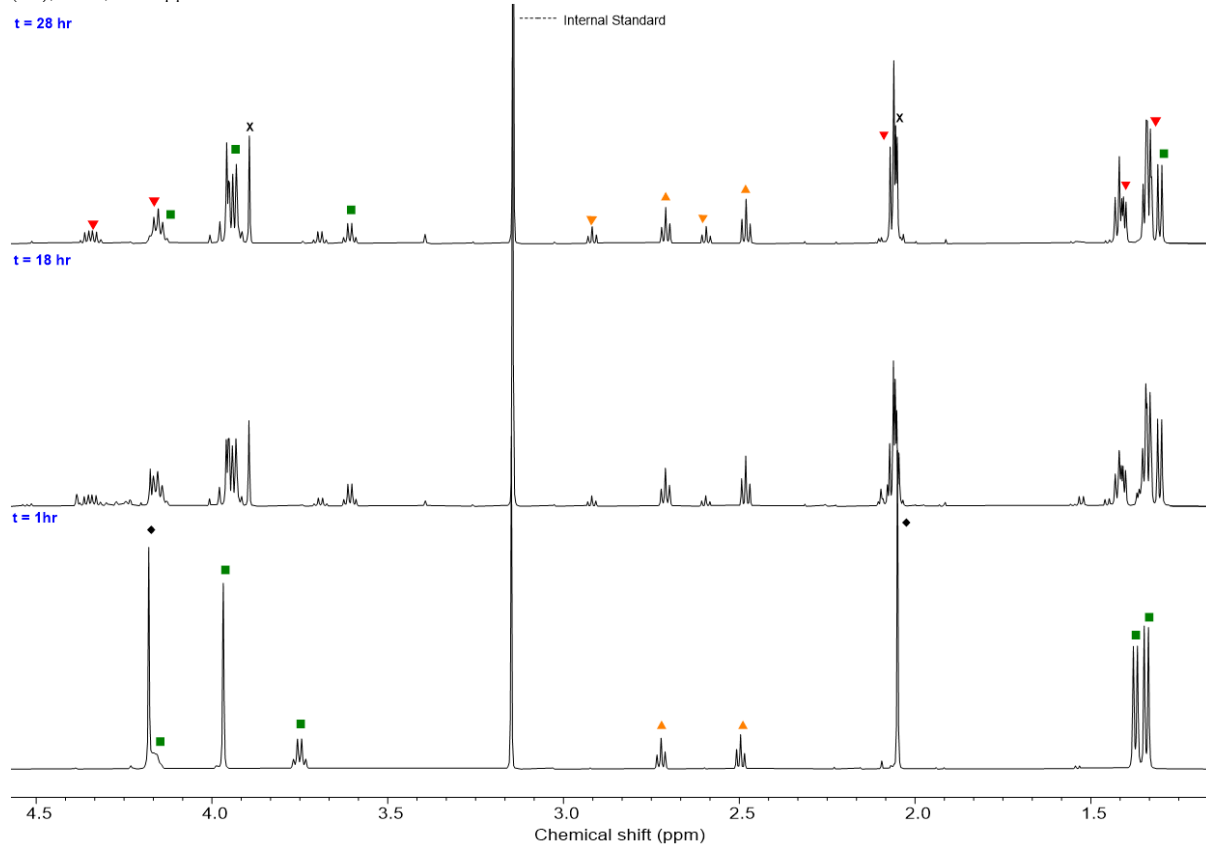

**Figure S104:**  $^1\text{H}$  NMR (600 MHz,  $\text{H}_2\text{O}/\text{D}_2\text{O}$  9:1, noesygppr1d, 1.0–5.0 ppm) spectrum to show the reaction of N-acetyl glycine nitrile (**1**; 100 mM), L-alanylglycyl-L-alanine (**2**<sub>AGA</sub>; 100 mM) and 3-mercaptopropionic acid (**6b**; 60 mM) with MSM (50 mM) as an internal standard in  $\text{H}_2\text{O}$  (1 mL) at pH 8.5 at 60°C.

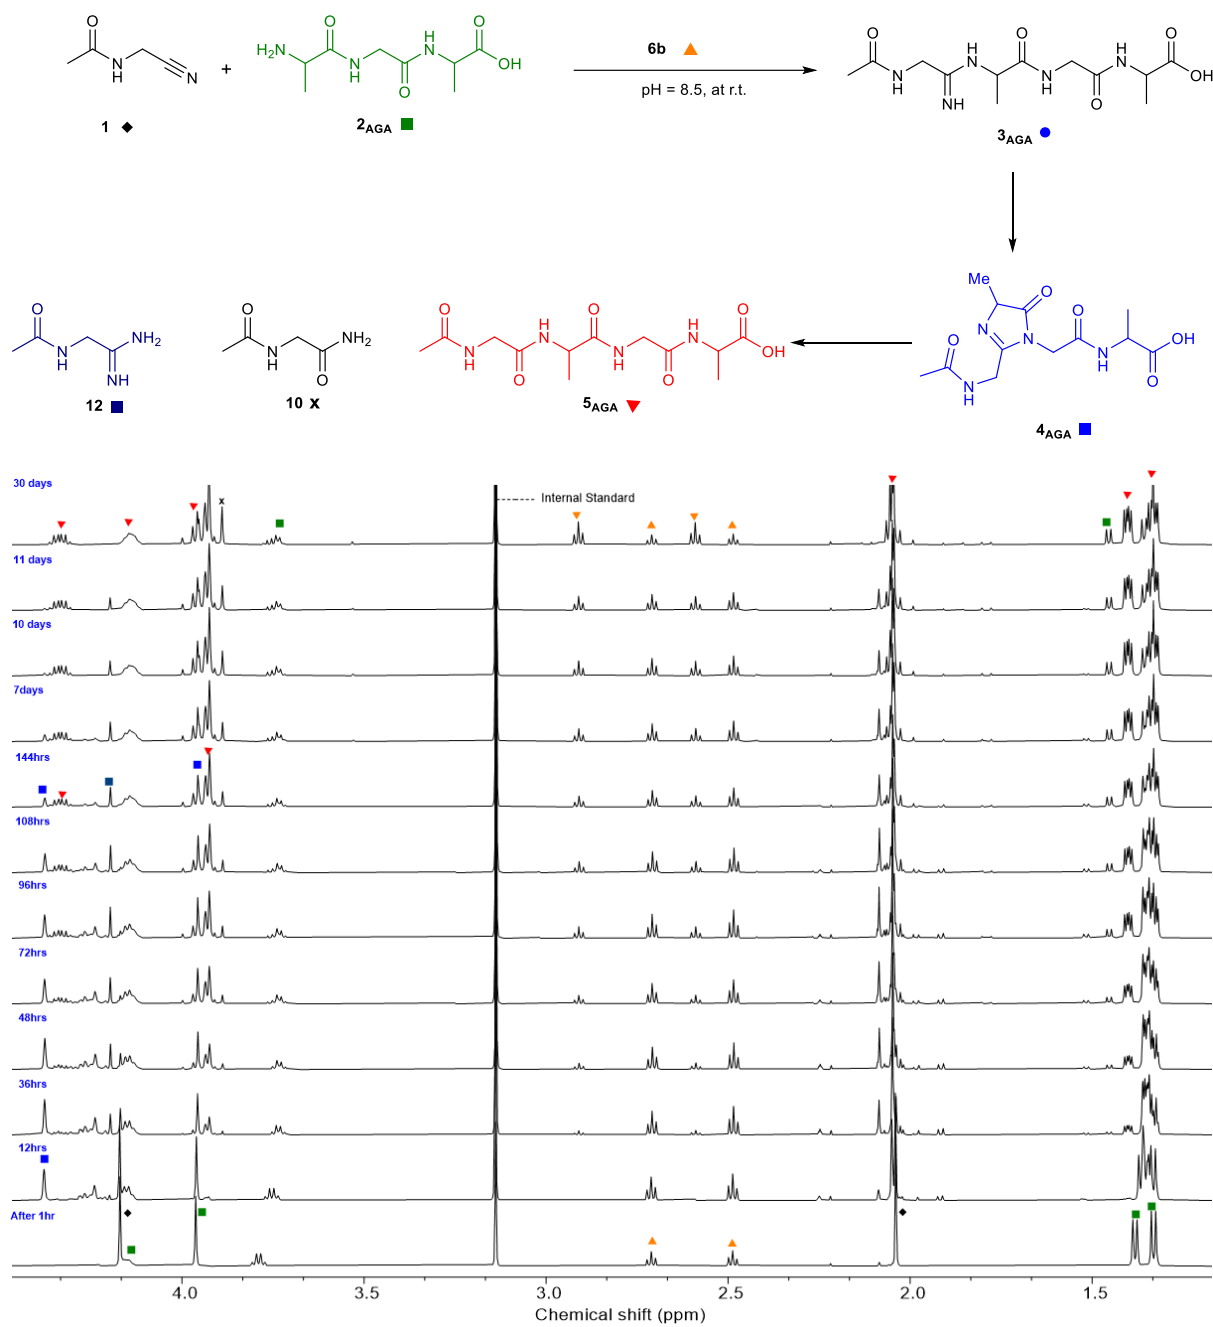

**Figure S105:** <sup>1</sup>H NMR (600 MHz, H<sub>2</sub>O/D<sub>2</sub>O 9:1, noesygppr1d, 1.3-4.5 ppm) spectrum to show the reaction of N-acetylglycine nitrile (**1**; 100 mM), L-alanyl-glycyl-L-alanine (**2<sub>AGA</sub>**; 130 mM), 3-mercaptopropionic acid (**6b**; 60 mM) with MSM (50 mM) as an internal standard at pH 8.5 at room temperature in borate buffer (1 M, 1 mL).

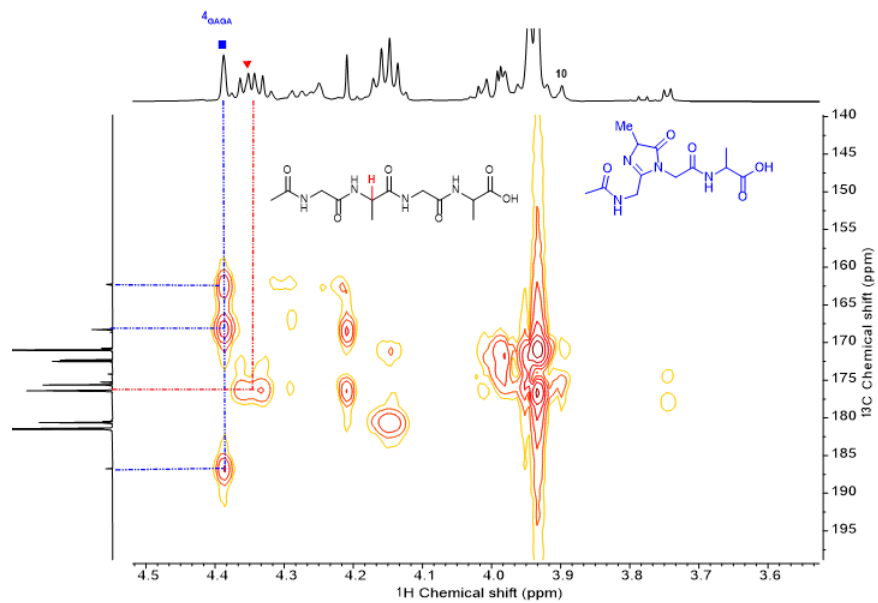

**Figure S106:** <sup>1</sup>H-<sup>13</sup>C HMBC (<sup>1</sup>H: 600 MHz [3.80–4.40 ppm], <sup>13</sup>C: 176 MHz [160-185 ppm]) spectrum of the coupling between N-acetyl glycine nitrile **1** and H-Ala-Gly-Ala-OH **2<sub>AGA</sub>** catalysed by **6b** after 12 h showing the diagnostic for **4<sub>AGA</sub>** imidazolone  $\alpha_{H1}$  = 4.39 ppm,  $\delta$ , 162.3, 168.4, 186.9 ppm.

Coupling of **1** with *L*-alanyl-glycine **2<sub>AG</sub>**

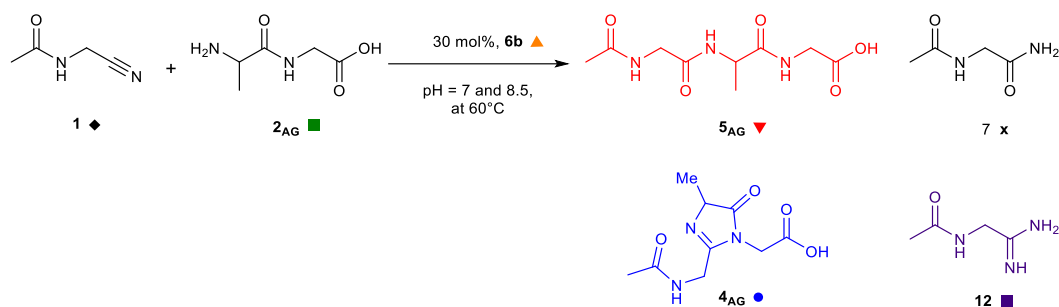

| Entry | pH  | <b>2<sub>AG</sub></b> | Temp / °C | <b>7</b> / % | <b>5<sub>AG</sub></b> / % |
|-------|-----|-----------------------|-----------|--------------|---------------------------|
| 1     | 7   | H-Ala-Gly-OH          | 60        | 10           | 86                        |
| 2     | 8.5 | H-Ala-Gly-OH          | 60        | 25           | 74                        |

**Table S23:** The effect of pH on thiol-catalyzed ligation of **1** with Ala-Gly **2<sub>AG</sub>**

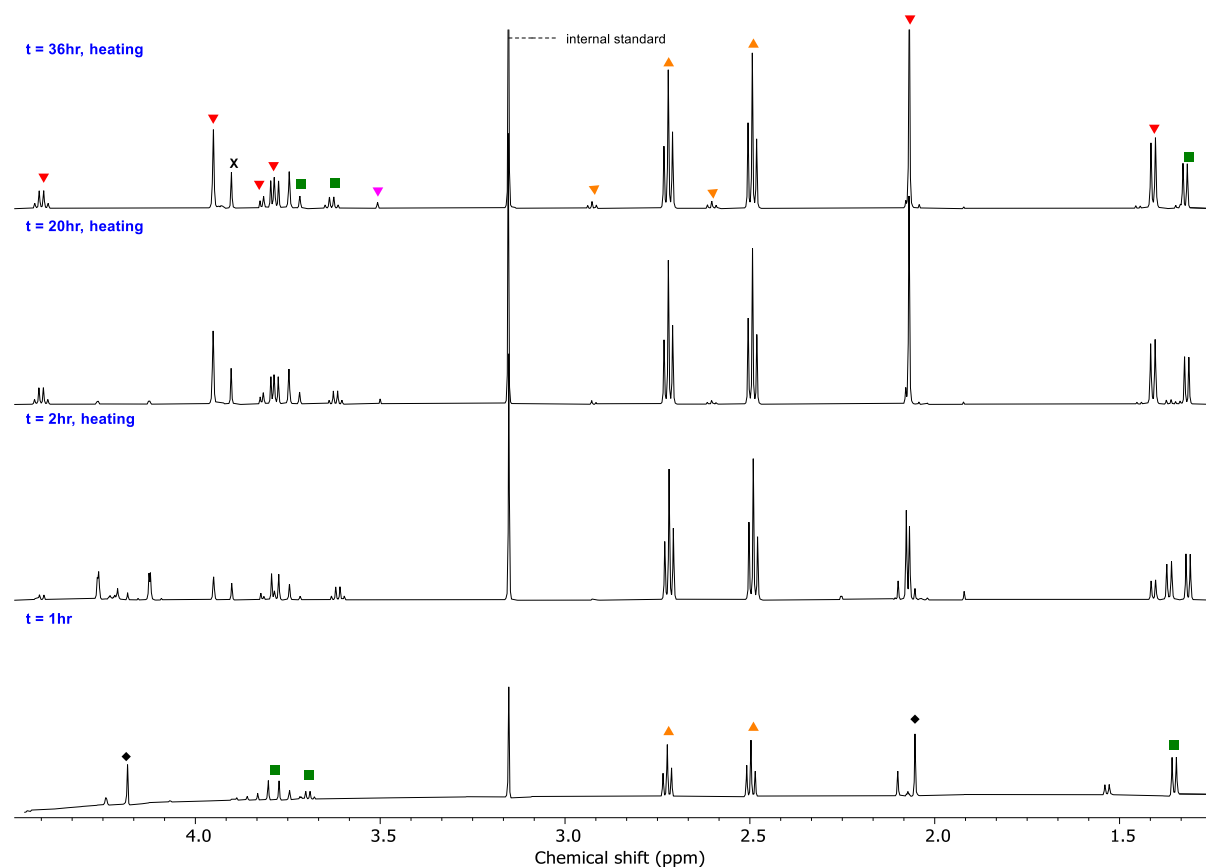

**Figure S107:** <sup>1</sup>H NMR (600 MHz, H<sub>2</sub>O/D<sub>2</sub>O 9:1, noesygppr1d, 1.3-4.5 ppm) spectrum to show the reaction of *N*-acetylglycine nitrile (**1**; 100 mM), *L*-alanyl-glycine (**2<sub>AG</sub>**; 130 mM), 3-mercaptopropionic acid (**6b**; 60 mM) with MSM (50 mM) as an internal standard in H<sub>2</sub>O (1 mL) at pH 8.5 at 60°C. **x** = *N*-acetylglycinamide, **▼** = glycine. Bottom spectrum = <sup>1</sup>H NMR spectrum acquired before the reaction was heated 60°C. Top spectrum = <sup>1</sup>H NMR spectrum acquired after heating reaction at 60°C for 36 h.

*N*-Acetylglycyl-*DL*-alanyl-glycine, **5<sub>AG</sub>** (2 diastereoisomers) (**▼**): <sup>1</sup>H NMR (600 MHz, H<sub>2</sub>O) δ 4.42 (q, *J* = 7.2 Hz, 1H, Ala-(C2)-H), 3.98 (s, 2H, Ac-Gly-(CH<sub>2</sub>)-H), 3.84-3.76 (m, 2H, Gly-(CH<sub>2</sub>)-COOH), 2.06 (s, 3H, COCH<sub>3</sub>), 1.41 (d, *J* = 7.3 Hz, Ala-(C3)-H<sub>3</sub>). **7** (**✕**) (partial assignment): δ<sub>H</sub> 3.91 (2H, s, CH<sub>2</sub>), 2.10 (3H, s, CH<sub>3</sub>).

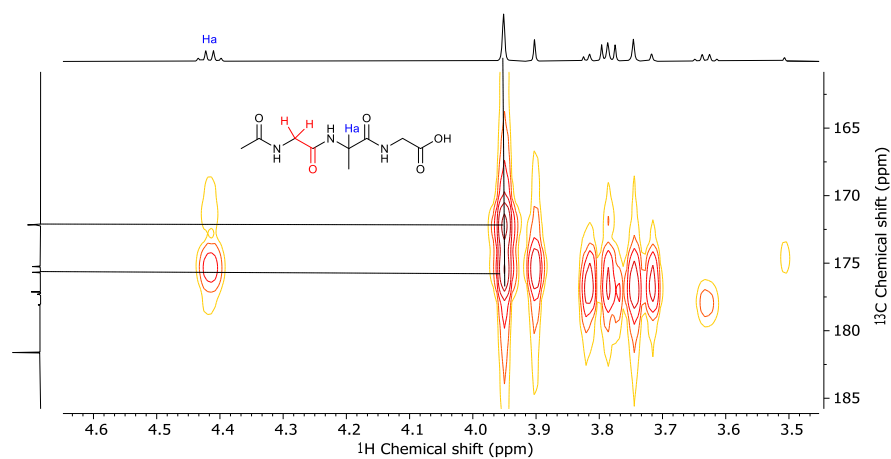

**Figure S108:**  $^1\text{H}$ - $^{13}\text{C}$  HMBC ( $^1\text{H}$ : 600 MHz [3.50–4.60 ppm],  $^{13}\text{C}$ : 176 MHz [160–190 ppm]) spectrum showing the diagnostic  $^2J_{\text{CH}}$  coupling of the Ac-Gly-Ala- $\alpha\text{H}$ -Gly-OH is at 4.42 ppm with two resonances at 175.5 and 172.3 ppm, which is characteristic of amide bond formation of Ala.

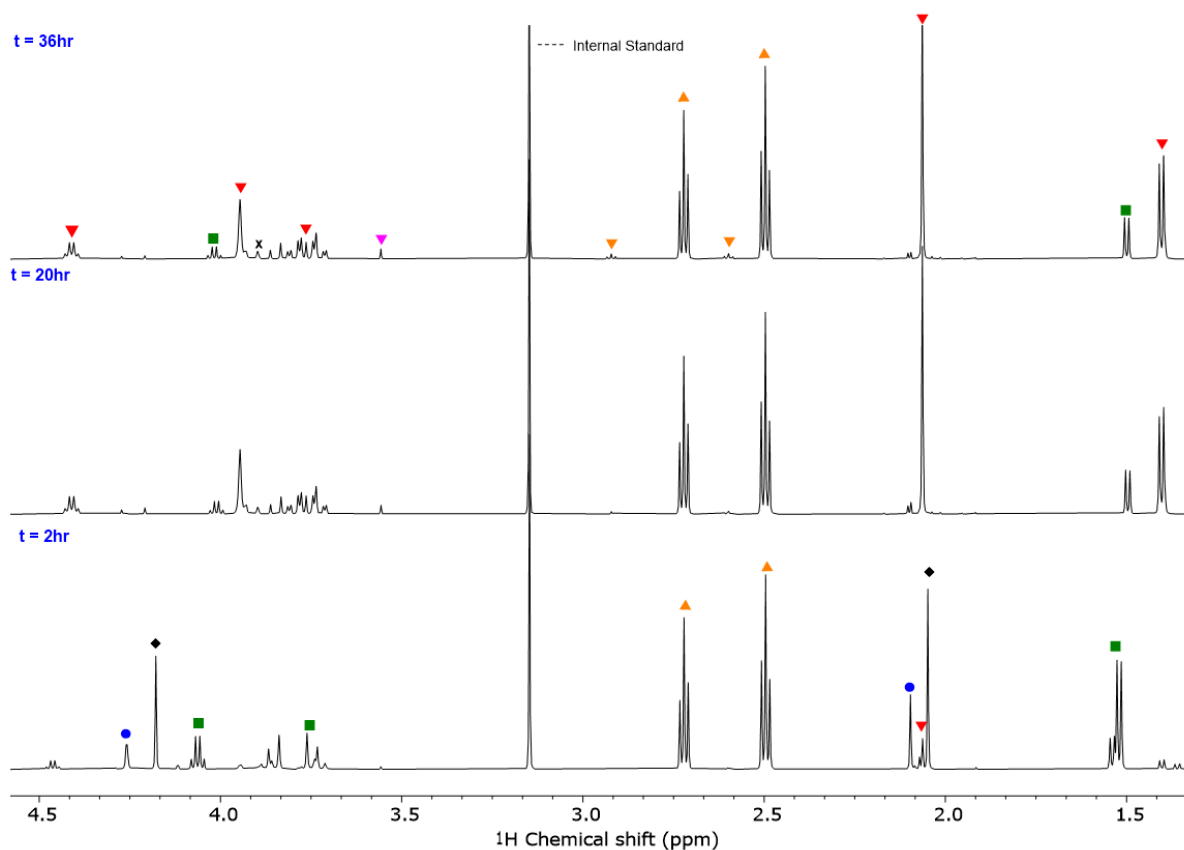

**Figure S109:**  $^1\text{H}$  NMR (600 MHz,  $\text{H}_2\text{O}/\text{D}_2\text{O}$  9:1, noesygppr1d, 1.3–4.5 ppm) spectrum to show the reaction of *N*-acetylglycine nitrile (**1**; 100 mM), *L*-alanyl-glycine (**2<sub>Ac</sub>**; 130 mM), 3-mercaptopropionic acid (**6b**; 60 mM) with MSM (50 mM) as an internal standard in  $\text{H}_2\text{O}$  (1 mL) at pH 7 at 60°C. **x** = *N*-acetylglycinamide, **▼** = glycine. Bottom spectrum =  $^1\text{H}$  NMR spectrum acquired before the reaction was heated 60 °C. Top spectrum =  $^1\text{H}$  NMR spectrum acquired after heating the reaction at 60°C for 36 h.

Preparative synthesis of amidines **3'**

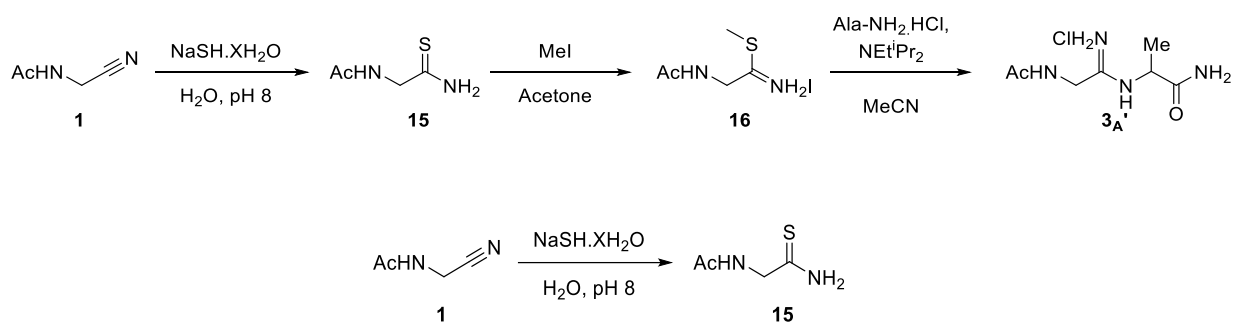

N-Acetyl glycine nitrile **1** (0.6 g, 6.3 mmol) and  $\text{B}(\text{OH})_3$  (1.5 g, 25 mmol) were dissolved in  $\text{H}_2\text{O}$  (25 mL).  $\text{NaSH}\cdot\text{xH}_2\text{O}$  (assumed 50 wt %  $\text{NaSH}$ , 3.2 g, 28 mmol) added and solution was adjusted to pH 9 with 4 M  $\text{HCl}$ . The solution as allowed to stir for 18 h, then  $\text{H}_2\text{S}$  was outgassed from the solution into a solution of concentrated bleach - a stream of  $\text{N}_2$  was passed through the solution for 30 mins while the pH of the reaction mixture was periodically adjusted to  $\sim$ pH 4 by addition of 4 M  $\text{HCl}$ . The resultant suspension was concentrated under reduced pressure and triturated with  $\text{EtOAc}$  ( $3 \times 50$  mL). The supernatant was concentrated to give **15** (440 mg, 3.3 mmol, 53%) as a yellow solid. Spectral data were consistent with those previously reported.<sup>3</sup>

$^1\text{H}$  NMR (700 MHz,  $\text{D}_2\text{O}$ , zg30): 4.21 (2H, s,  $\text{AcNHCH}_2$ ), 2.07 (3H, s, **Ac**), ppm

$^{13}\text{C}$  NMR (176.1 MHz,  $\text{D}_2\text{O}$ , zgpg30): 205.0 ( $\text{C}=\text{S}$ ), 175.5 ( $\text{CONH}$ ), 49.9 ( $\text{AcNHCH}_2$ ), 22.4 ( $\text{CH}_3\text{CONH}$ ) ppm.

ES-HRMS (pos.) theoretical for  $[\text{C}_4\text{H}_8\text{N}_2\text{OS}+\text{H}]^+$ : 133.0430; observed 133.0430.

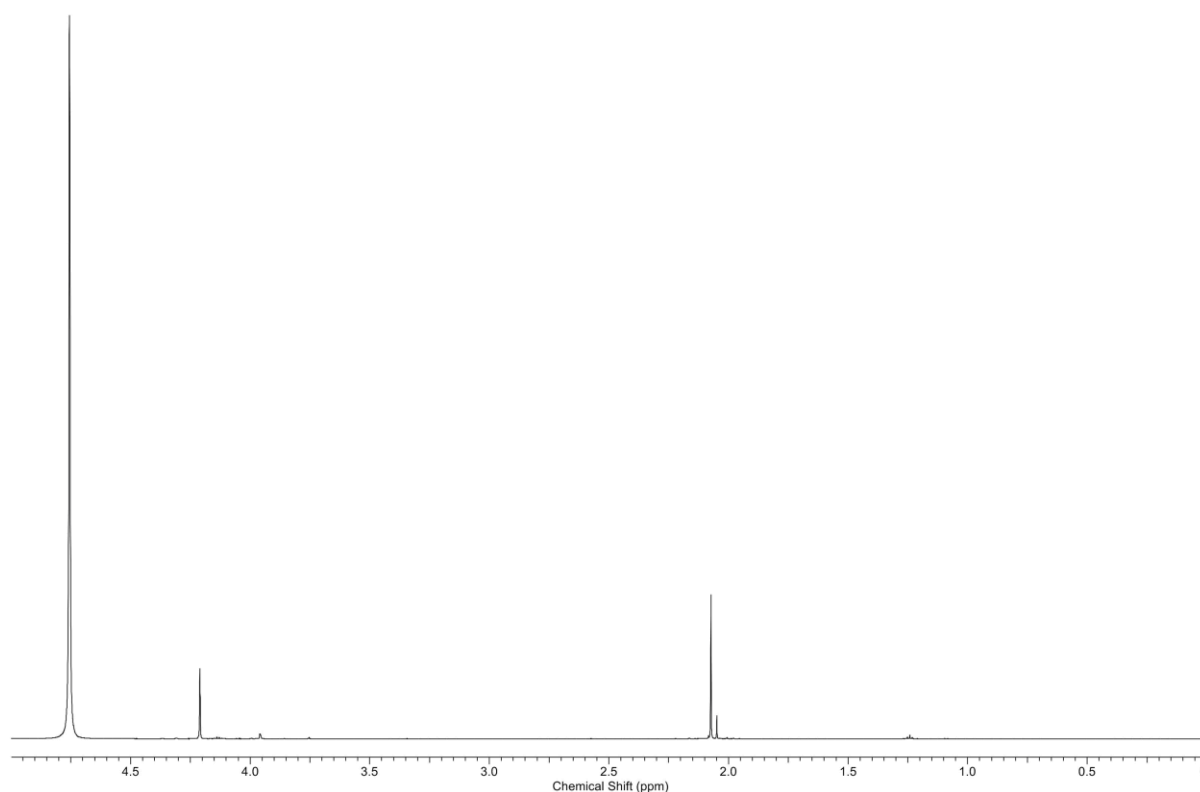

Figure S110  $^1\text{H}$  NMR (700 MHz,  $\text{D}_2\text{O}$ , zg30, 0.0-5.0 ppm) spectrum of **15**



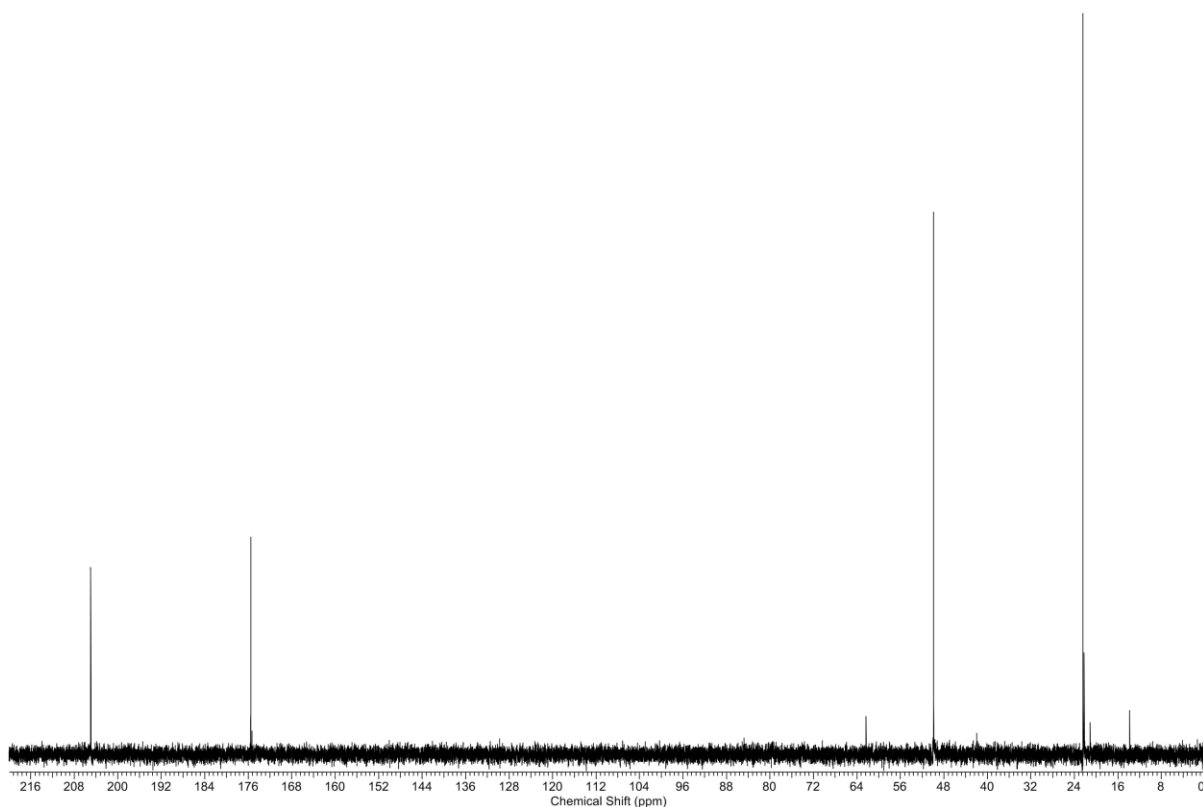

**Figure S111:**  $^{13}\text{C}$  NMR (176.1 MHz,  $\text{D}_2\text{O}$ , zg30, 0-220 ppm) spectrum of **15**

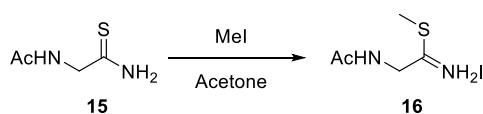

**15** (200 mg, 1.5 mmol) was dissolved in acetone (3.0 mL, 0.5 M) and the solution was cooled to  $0^\circ\text{C}$ . Iodomethane (200  $\mu\text{L}$ , 3.1 mmol, 2 equiv.) was added and the solution allowed to warm to room temperature and stand for 3 h. The colourless precipitate which formed in this time was separated by centrifugation, washed with acetone ( $3 \times 3$  mL) and dried under vacuum to give thioimidate **16** as a colourless solid (250 mg, 0.9 mmol, 61%).

$^1\text{H}$  NMR (700 MHz,  $\text{d}_3$ -MeOD, zg30): 4.24 (2H, s, AcNHC $\underline{H}_2$ ), 2.05 (3H, s, **Ac**), 2.01 (3H, s, **SMe**) ppm

$^{13}\text{C}$  NMR (176.1 MHz,  $\text{d}_3$ -MeOD, zgpg30): 180.4 (**C**(=NH)SMe), 174.5 (**C**ONH), 41.8 (AcNH $\underline{C}H_2$ -), 22.3 (**C**H<sub>3</sub>CONH-), 22.1 (**S**C $\underline{H}_3$ ) ppm

ES-HRMS (pos.) theoretical for  $[\text{C}_5\text{H}_{11}\text{N}_2\text{OS}]^+$ : 147.0598, observed 147.0594

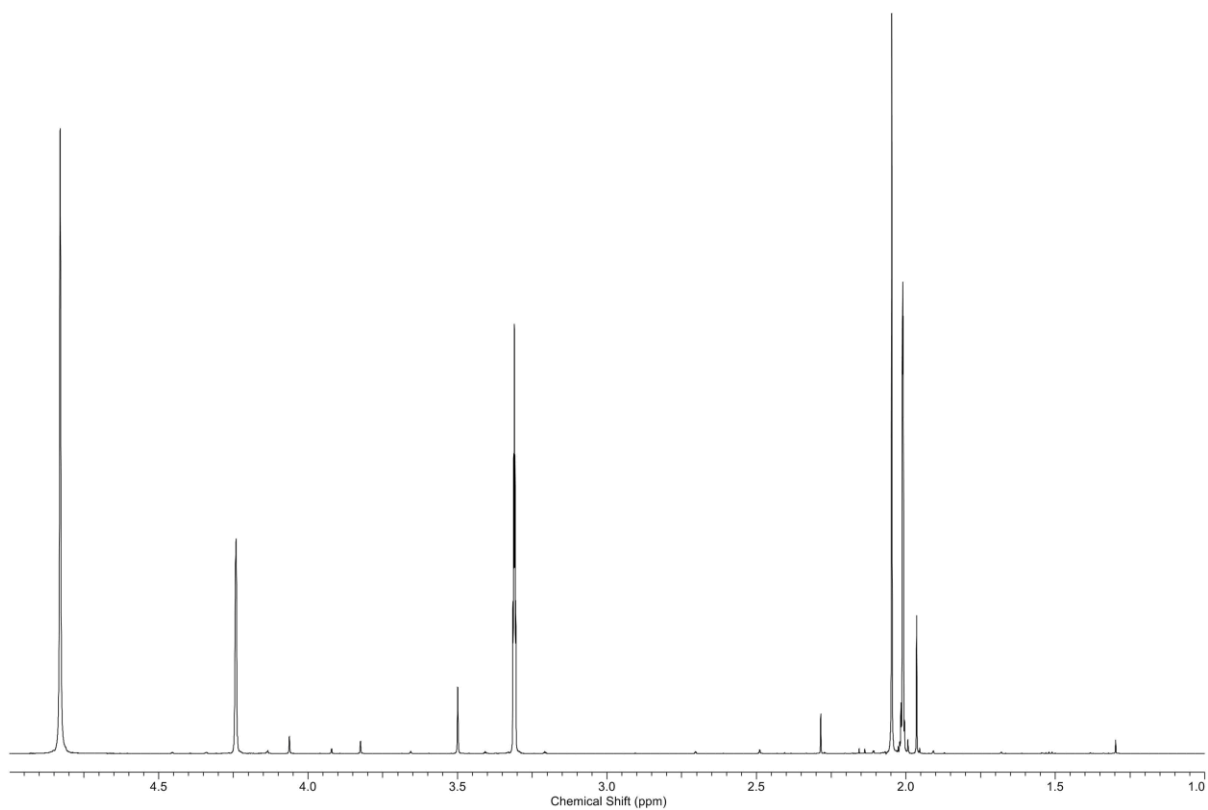

Figure S112:  $^1\text{H}$  NMR (700 MHz,  $\text{d}_3\text{-MeOD}$ , zg30, 0.0-5.0 ppm) spectrum of **16**

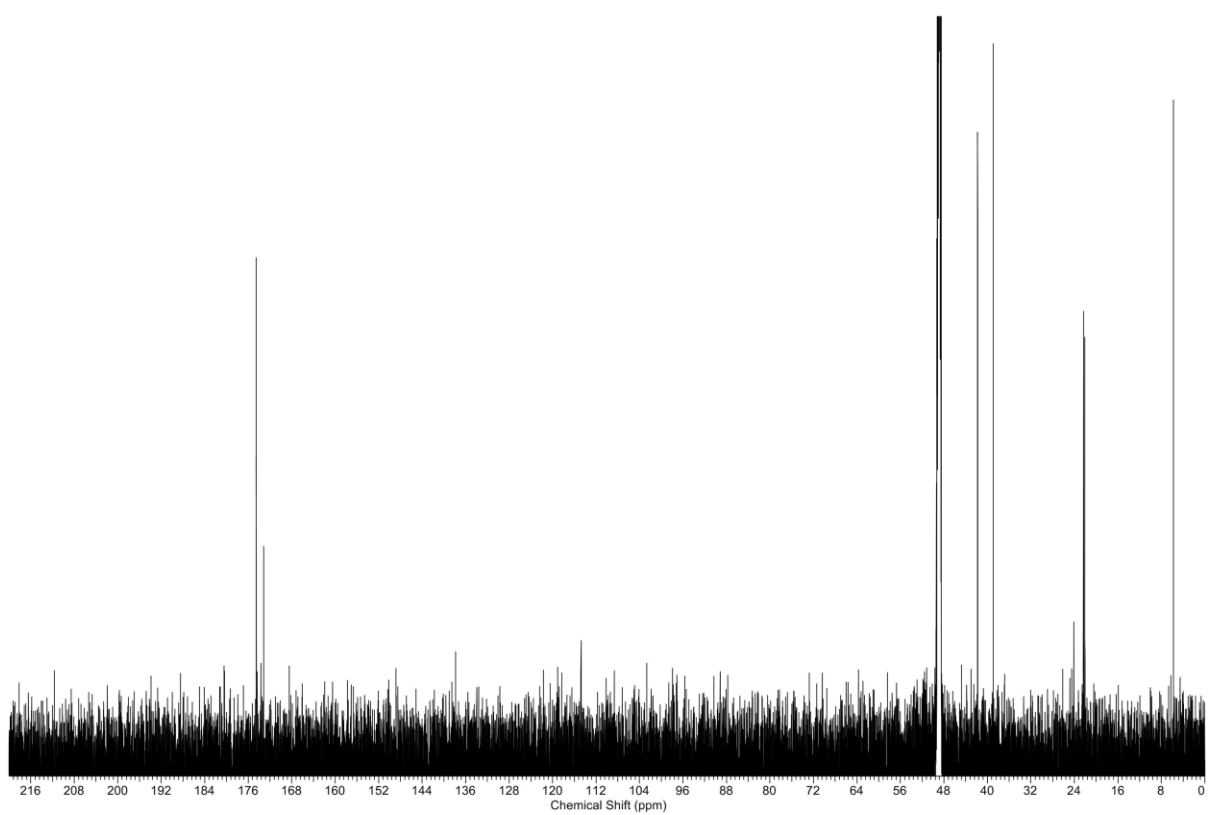

Figure S113:  $^{13}\text{C}$  NMR (176.1 MHz,  $\text{d}_3\text{-MeOD}$ , zg30, 0-220 ppm) spectrum of **16**

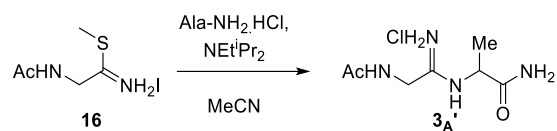

$\text{AlaNH}_2\cdot\text{HCl}$  **2A'** $\cdot\text{HCl}$  (85 mg, 0.7 mmol) and thioimide **16** (215 mg, 0.9 mmol, 1.3 equiv.) were suspended in anhydrous  $\text{MeCN}$  (3.6 mL) in a flame-dried flask under an atmosphere of argon.  $\text{NEt}^i\text{Pr}_2$  (240  $\mu\text{L}$ , 1.4 mmol, 2 equiv.) was added, and the homogeneous solution stirred for 2 h at which point a colourless precipitate had formed. The solid was separated by centrifugation, washed with anhydrous  $\text{MeCN}$  ( $3 \times 2$  mL) and dried under vacuum to give amidine **3A'** as a colourless solid (120 mg, 0.5 mmol, 71%).

$^1\text{H NMR}$  (700 MHz,  $\text{D}_2\text{O}$ , zg30): 4.38 (1H, q,  $J = 7.0$  Hz,  $\text{C}^{\text{H}}(\text{Me})\text{CONH}_2$ ), 4.21 (2H, AB,  $J = 17.5$  Hz,  $\text{AcNHCH}_2$ ), 2.06 (3H, s, **Ac**), 1.50 (3H, d,  $J = 7.0$  Hz, **Me**) ppm

$^{13}\text{C NMR}$  (176.1 MHz,  $\text{D}_2\text{O}$ , zgpg30): 176.3 ( $\text{CH}_3\text{CONH}$ ), 174.7 ( $\text{CONH}_2$ ), 165.4 ( $\text{C}(\text{NH})\text{NH}$ ), 52.2 ( $\text{AcNHCH}_2$ ), 40.9 ( $\text{CH}(\text{Me})\text{CONH}_2$ ), 22.2 ( $\text{CH}_3\text{CONH}$ ), 17.5 (**Me**) ppm

ES-HRMS (pos.) theoretical for  $[\text{C}_7\text{H}_{15}\text{N}_4\text{O}_2]^+$ : 187.1190, measured: 187.1191.

IR: 3167, 2924, 1653, 1552, 1287, 1067, 557, 465  $\text{cm}^{-1}$

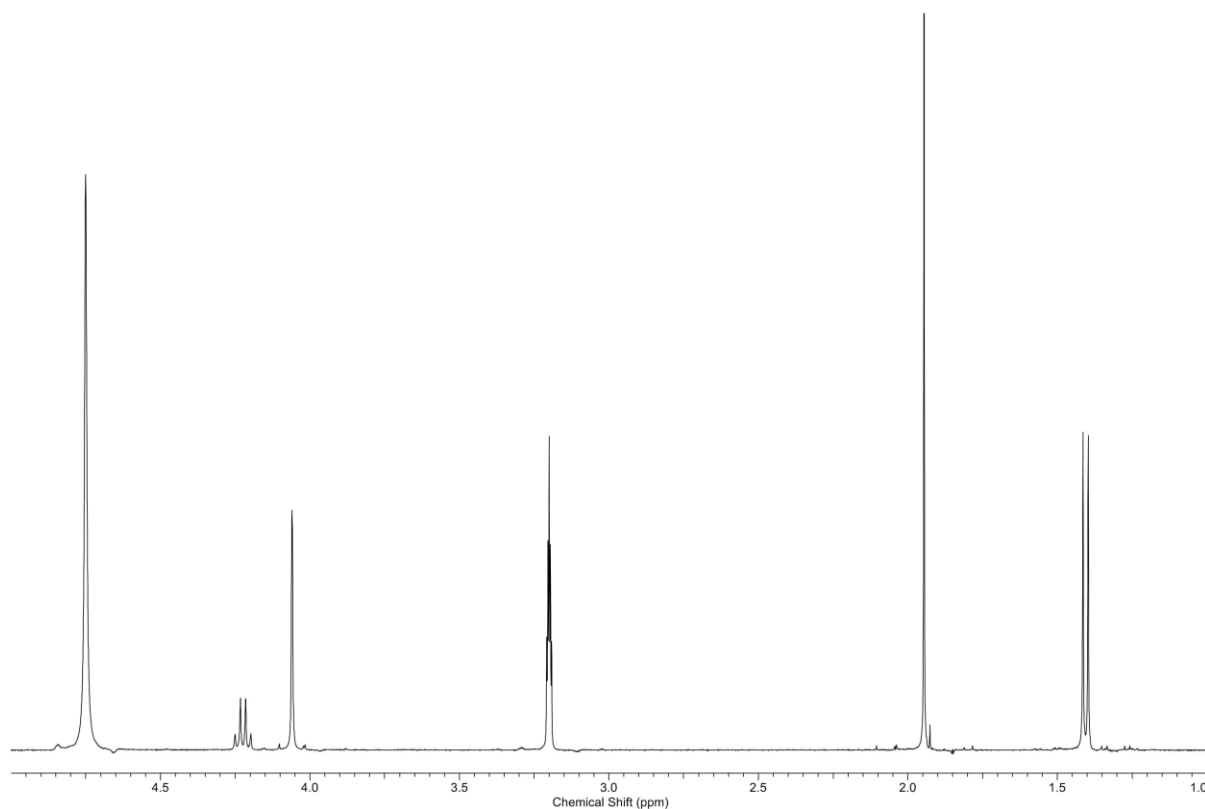

**Figure S114:**  $^1\text{H NMR}$  (700 MHz,  $\text{D}_2\text{O}$ , zg30, 0.0-5.0 ppm) spectrum of **3A'**

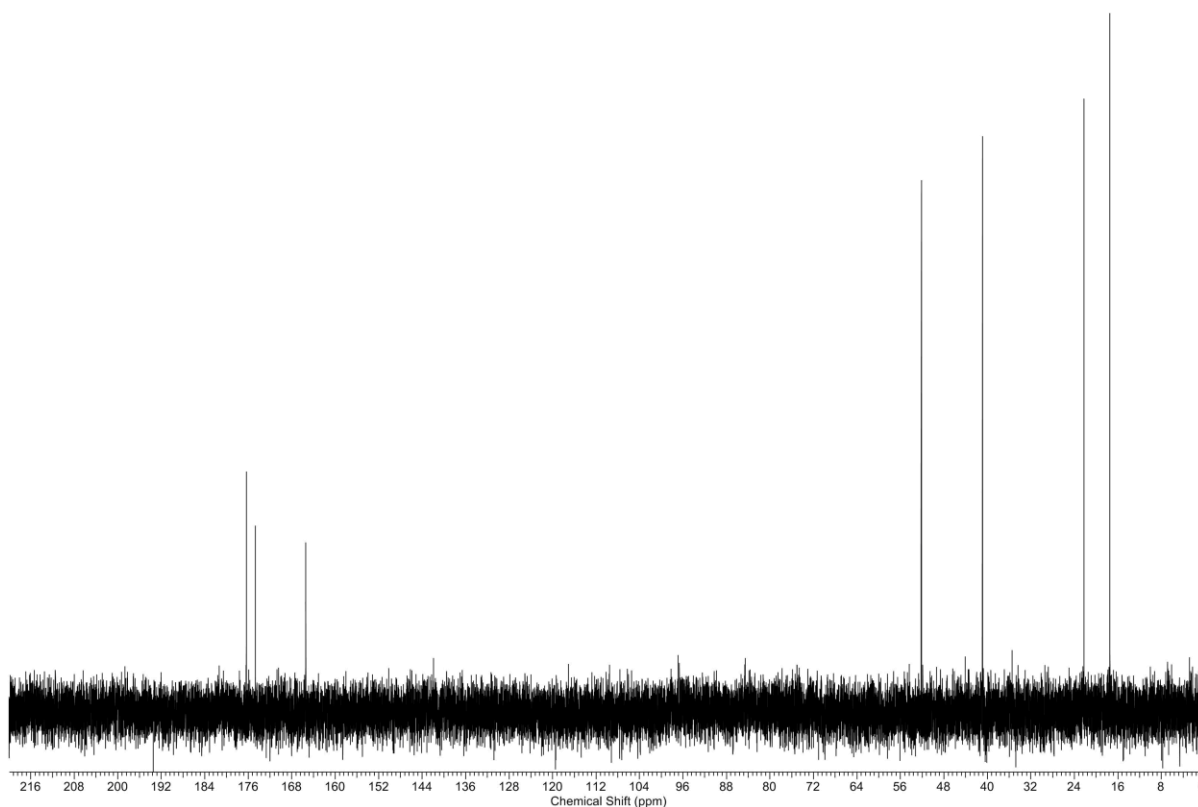

Figure S115: <sup>13</sup>C NMR (176.1 MHz, D<sub>2</sub>O, zg30, 0-220 ppm) spectrum of **3A'**

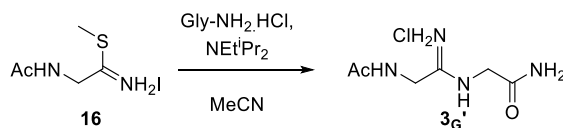

GlyNH<sub>2</sub>·HCl **2G'**·HCl (36.5 mg, 0.3 mmol) and thioimidate **16** (103 mg, 0.4 mmol, 1.3 equiv.) were suspended in anhydrous MeCN (2.2 mL) in a flame-dried flask under an atmosphere of argon. NEt<sup>t</sup>Pr<sub>2</sub> (115 μL, 0.7 mmol, 2 equiv) was added, and the homogeneous solution stirred for 3 h at which point a colourless precipitate had formed. The solid was separated by centrifugation, washed with anhydrous MeCN (3 × 2 mL) and dried under vacuum to give amidine **3G'** as a colourless solid (55 mg, 0.2 mmol, 75%).

ES-HRMS (pos.) theoretical for [C<sub>6</sub>H<sub>13</sub>N<sub>4</sub>O<sub>2</sub>]<sup>+</sup>: 173.1033, observed 173.1032

<sup>1</sup>H NMR (700 MHz, D<sub>2</sub>O, zg30): 4.28 (2H, s, AcNHCH<sub>2</sub>), 4.18 (2H, s, CH<sub>2</sub>CONH<sub>2</sub>) 2.10 (3H, s, **Ac**) ppm

<sup>13</sup>C NMR (176.1 MHz, D<sub>2</sub>O, zgpg30): 176.4 (CH<sub>3</sub>CONH), 171.1 (CONH<sub>2</sub>), 166.6 (C(NH)NH), 44.6 (AcNHCH<sub>2</sub>-), 40.7 (CH<sub>2</sub>CONH<sub>2</sub>), 22.3 (CH<sub>3</sub>CONH) ppm

IR: 3230, 3026, 1677, 1647, 1537, 1393, 748, 592, 506 cm<sup>-1</sup>

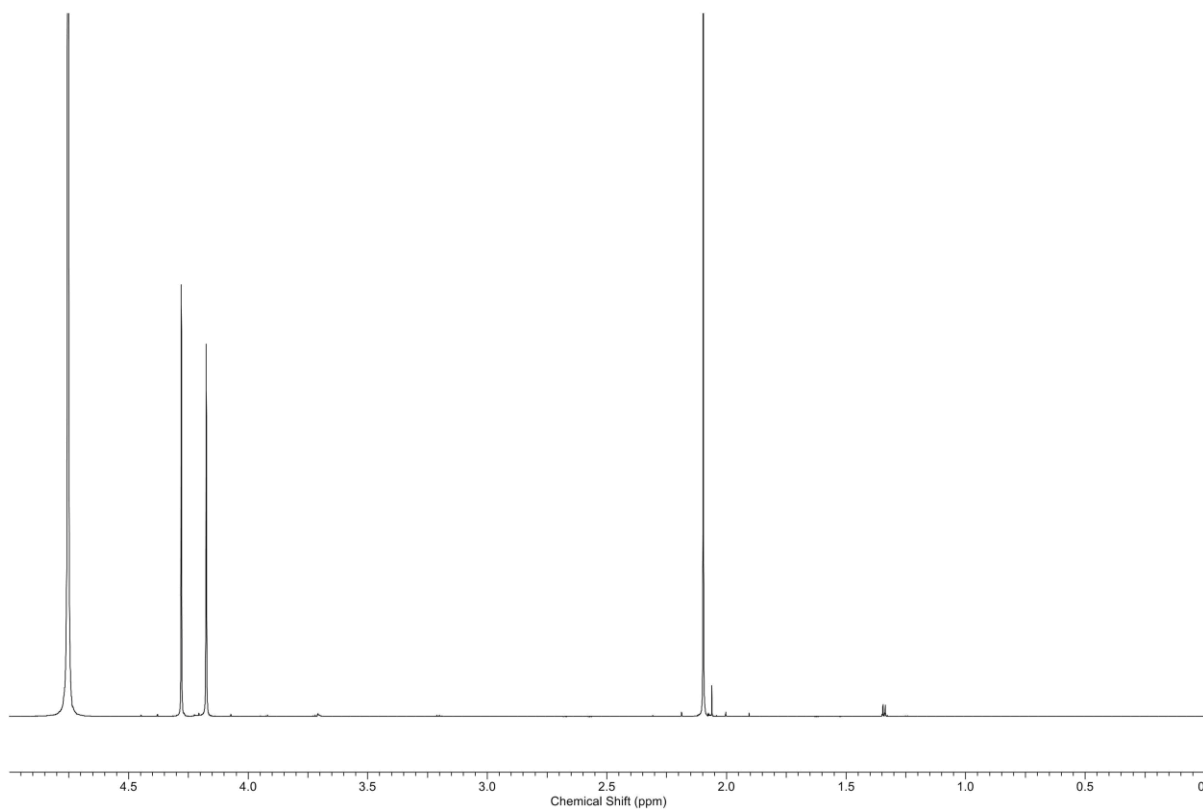

**Figure S116:** <sup>1</sup>H NMR (700 MHz, D<sub>2</sub>O, zg30, 0.0-5.0 ppm) spectrum of **3g'**

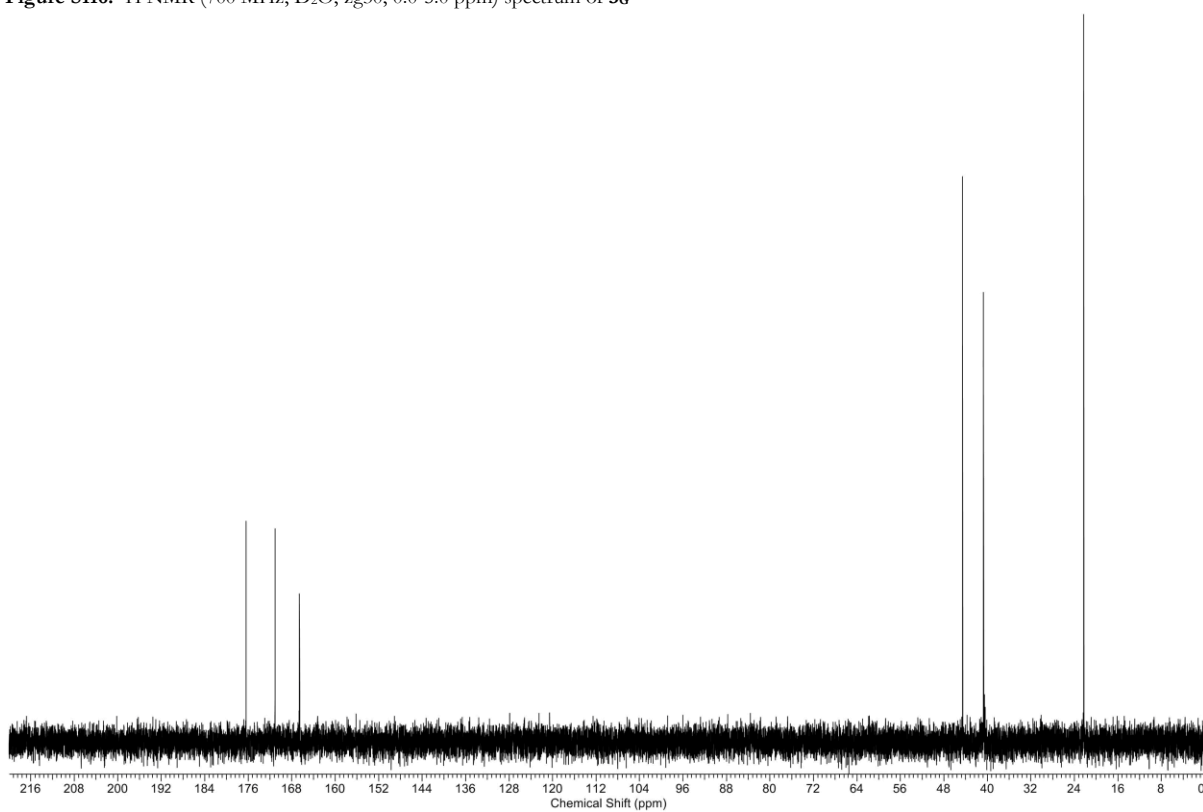

**Figure S117:** <sup>13</sup>C NMR (176.1 MHz, D<sub>2</sub>O, zg30, 0-220 ppm) spectrum of **3g'**

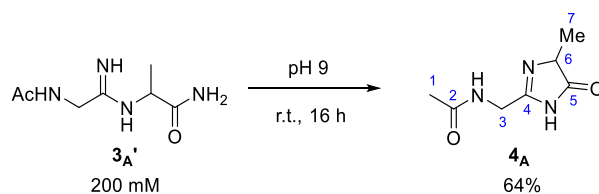

**3A'** (5 mg, 0.025 mmol) and MSM [internal standard] were dissolved in H<sub>2</sub>O (800 μL). The solution was adjusted to pH 9 with 4 M NaOH, D<sub>2</sub>O (50 μL) was added and the solution volume was increased to 1 mL. <sup>1</sup>H NMR spectra were acquired periodically. After 16 h the mixture was characterised by <sup>1</sup>H, <sup>13</sup>C, and <sup>1</sup>H-<sup>13</sup>C HMBC NMR. The solution was lyophilised and analysed by HRMS.

<sup>1</sup>H NMR (700 MHz, H<sub>2</sub>O/D<sub>2</sub>O 19:1, noesygppr1d): 4.26 (2H, t, *J* = 2.2 Hz, C3-H<sub>2</sub>), 4.16 (1H, qt, *J* = 7.4, 2.2 Hz, C6-H), 2.05 (3H, s, C1-H<sub>3</sub>), 1.33 (3H, d, *J* = 7.4 Hz, C7-H<sub>3</sub>) ppm.

<sup>13</sup>C NMR (176.1 MHz, H<sub>2</sub>O/D<sub>2</sub>O 19:1, zgpg30): 193.7 (C5), 175.6 (C2), 173.9 (C4), 61.4 (C6), 39.1 (C3), 22.4 (C1), 15.65 (C7) ppm.

HRMS (ESI pos.)– [C<sub>7</sub>H<sub>11</sub>N<sub>3</sub>O<sub>2</sub>+H]<sup>+</sup> theoretical 170.0924, measured 170.0921.

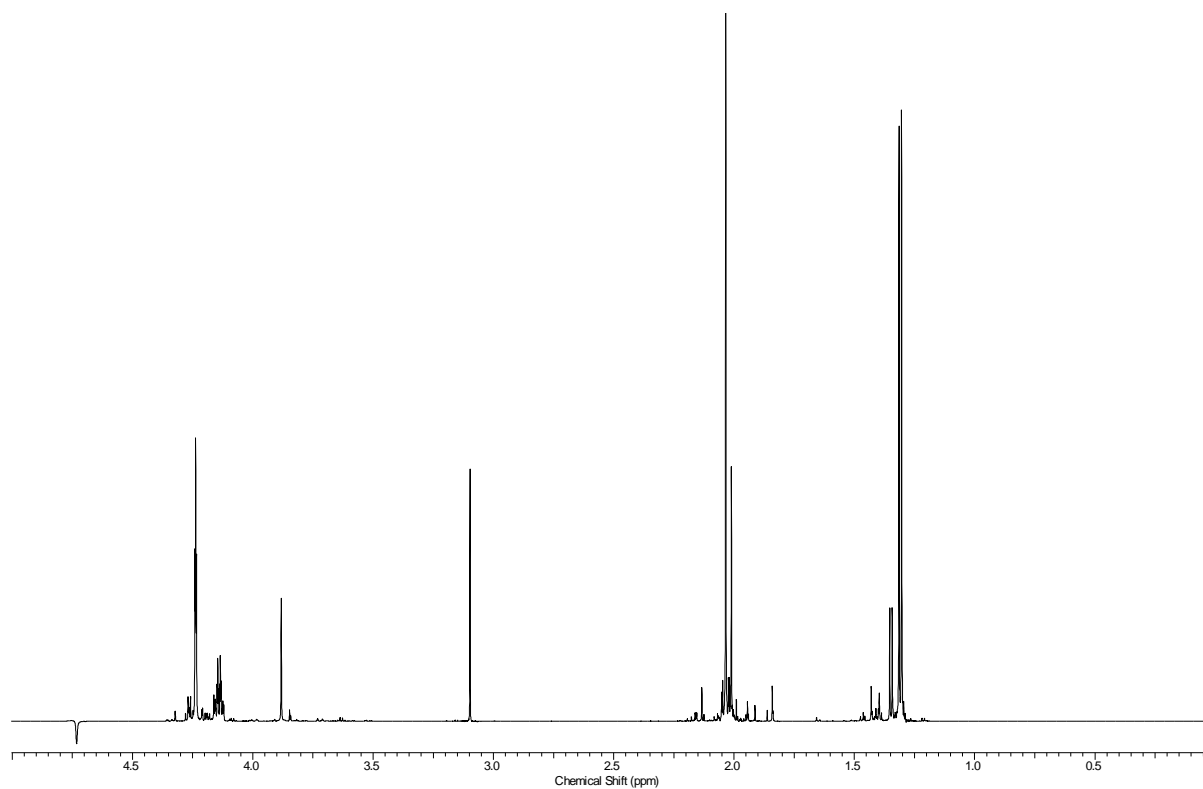

**Figure S118:** <sup>1</sup>H NMR (700 MHz, H<sub>2</sub>O/D<sub>2</sub>O 9:1, noesygppr1d, 0.0-5.0 ppm) spectrum to show the cyclisation of **3A'** (25 mM) to form **4A** after 16 h at room temperature and pH 9.

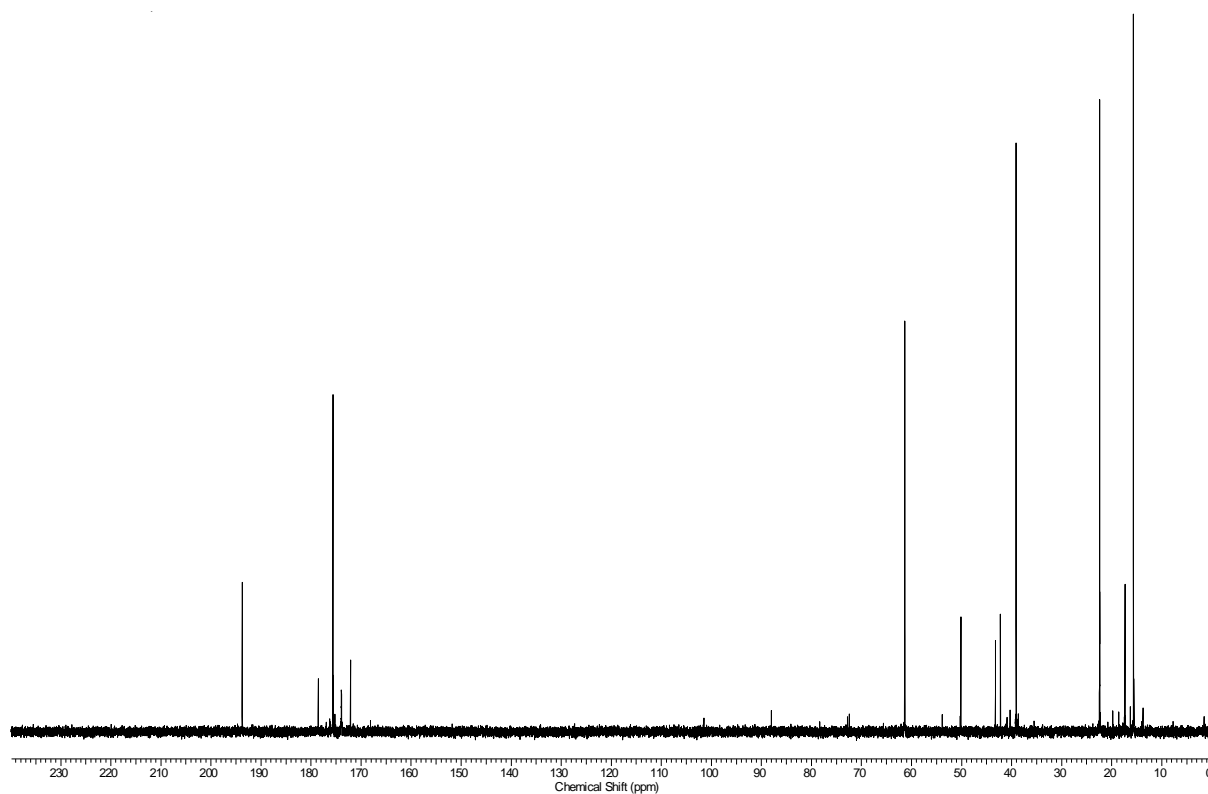

**Figure S119** <sup>13</sup>C NMR (176.1 MHz, H<sub>2</sub>O/D<sub>2</sub>O 9:1, zg30, 0-240 ppm) spectrum to show the cyclisation of **3A'** (25 mM) to form **4A** after 16 h at room temperature and pH 9.

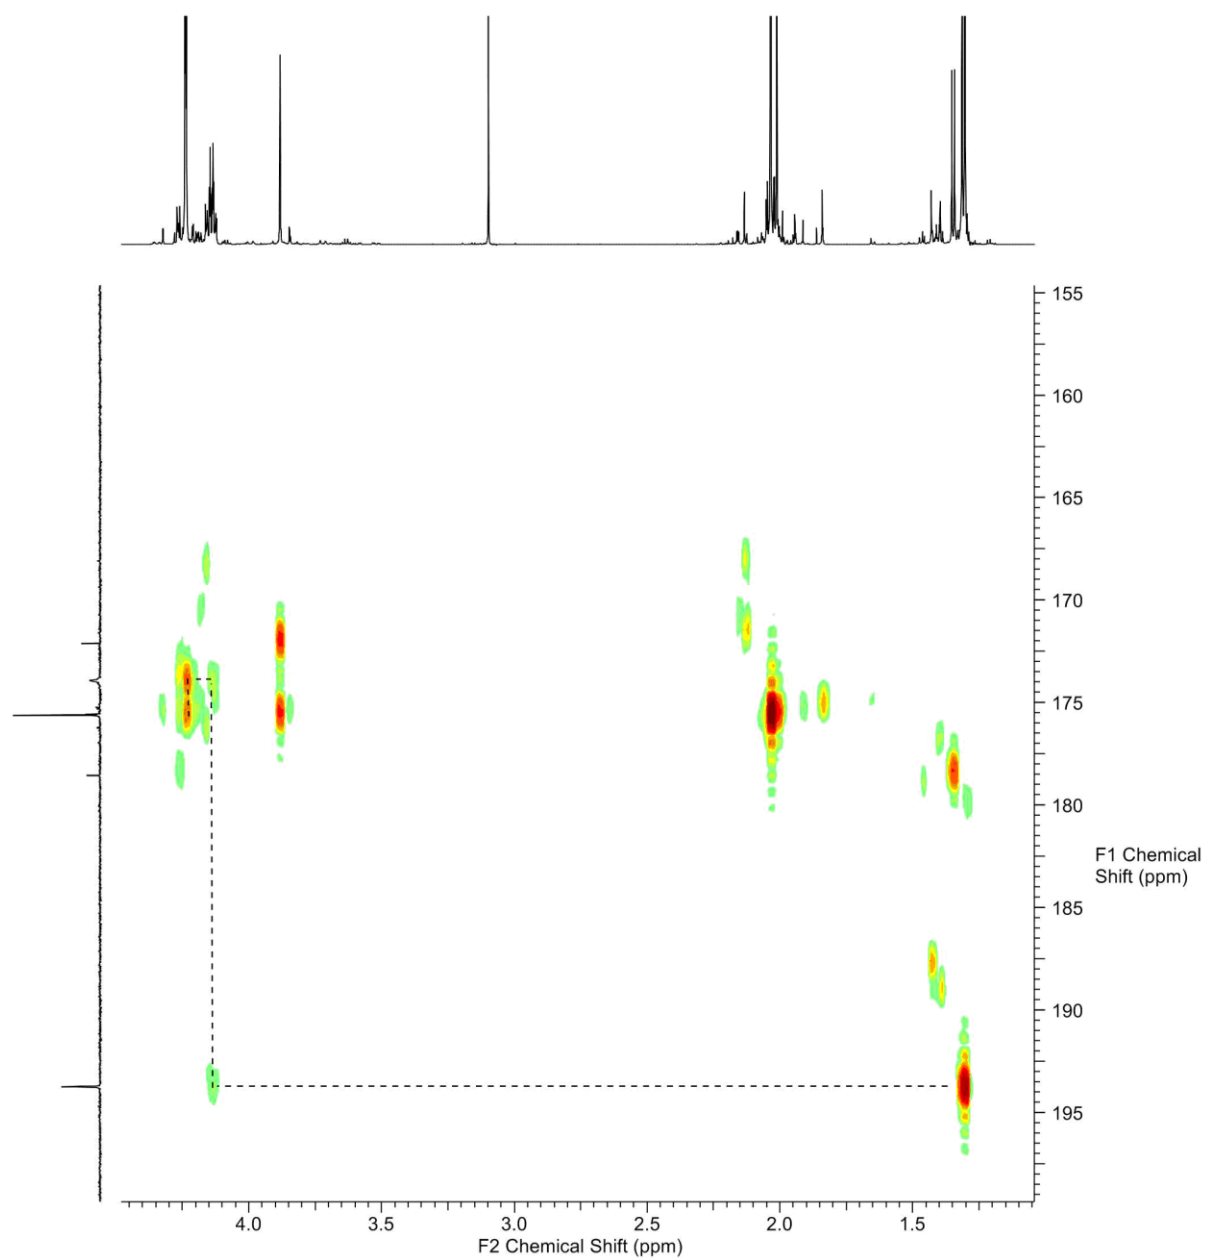

**Figure S120:**  $^1\text{H}$ - $^{13}\text{C}$  HMBC ( $^1\text{H}$ : 700 MHz [1.0-4.5 ppm],  $^{13}\text{C}$ : 176 MHz [155-200 ppm],  $\text{H}_2\text{O}/\text{D}_2\text{O}$  9:1) spectrum to show the cyclisation of **3A'** (25 mM) to form **4A** after 16 h at room temperature and pH 9, showing the diagnostic  $^2\text{J}_{\text{CH}}$  and  $^3\text{J}_{\text{CH}}$  coupling of **Ala- $\alpha\text{H}$**  in **4A** at 4.15 ppm with two resonances at 174.5 and 188.7 ppm, which is characteristic of imidazolone formation.



### Isolation of **3A**

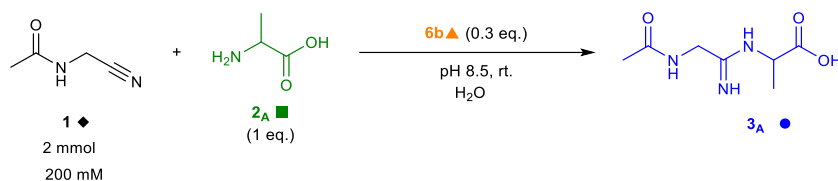

N-Acetyl glycine nitrile **1** (200 mg, 2 mmol), L-alanine **2A** (2 mmol) and 3-mercaptopropionic acid **6b** were dissolved in  $\text{H}_2\text{O}$  (10 mL) and the solution was adjusted to pH 8.5 with 4 M NaOH. The reaction was stirred at room temperature for 2 days, then the solution was adjusted to pH 3.0 with 4 M HCl and extracted with  $\text{Et}_2\text{O}$  ( $3 \times 25$  mL) to remove the thiol. The solution was adjusted to pH 7.0 and lyophilised. The solid residue was triturated with  $\text{EtOH}$  ( $2 \times 15$  mL) to leave **3A** as a colourless solid (250 mg, 1.33 mmol, 67%).

$^1\text{H}$  NMR (700 MHz,  $\text{D}_2\text{O}$ , zg30): 4.24 (2H, AB,  $J = 17.4$  Hz,  $\text{AcNHCH}_2$ ), 4.13 (1H, q,  $J = 7.1$  Hz,  $\text{CH}(\text{Me})\text{CONH}_2$ ), 2.10 (3H, s, **Ac**), 1.46 (3H, d,  $J = 7.1$  Hz, **Me**) ppm

$^{13}\text{C}$  NMR (176.1 MHz,  $\text{D}_2\text{O}$ , zgpg30): 177.0 ( $\text{CONH}_2$ ), 176.2 ( $\text{CH}_3\text{CONH}$ ), 164.0 ( $\text{C}(\text{NH})\text{NH}$ ), 53.8 ( $\text{CH}(\text{Me})\text{CONH}_2$ ), 40.7 ( $\text{AcNHCH}_2$ ), 22.3 ( $\text{CH}_3\text{CONH}$ ), 17.4 (**Me**) ppm

IR: 3238, 2932, 1641, 1563, 1362, 771, 731, 457  $\text{cm}^{-1}$

ES-HRMS (pos.) theoretical for  $[\text{C}_7\text{H}_{13}\text{N}_4\text{O}_2 + \text{H}]^+$ : 188.1030, observed 188.1030

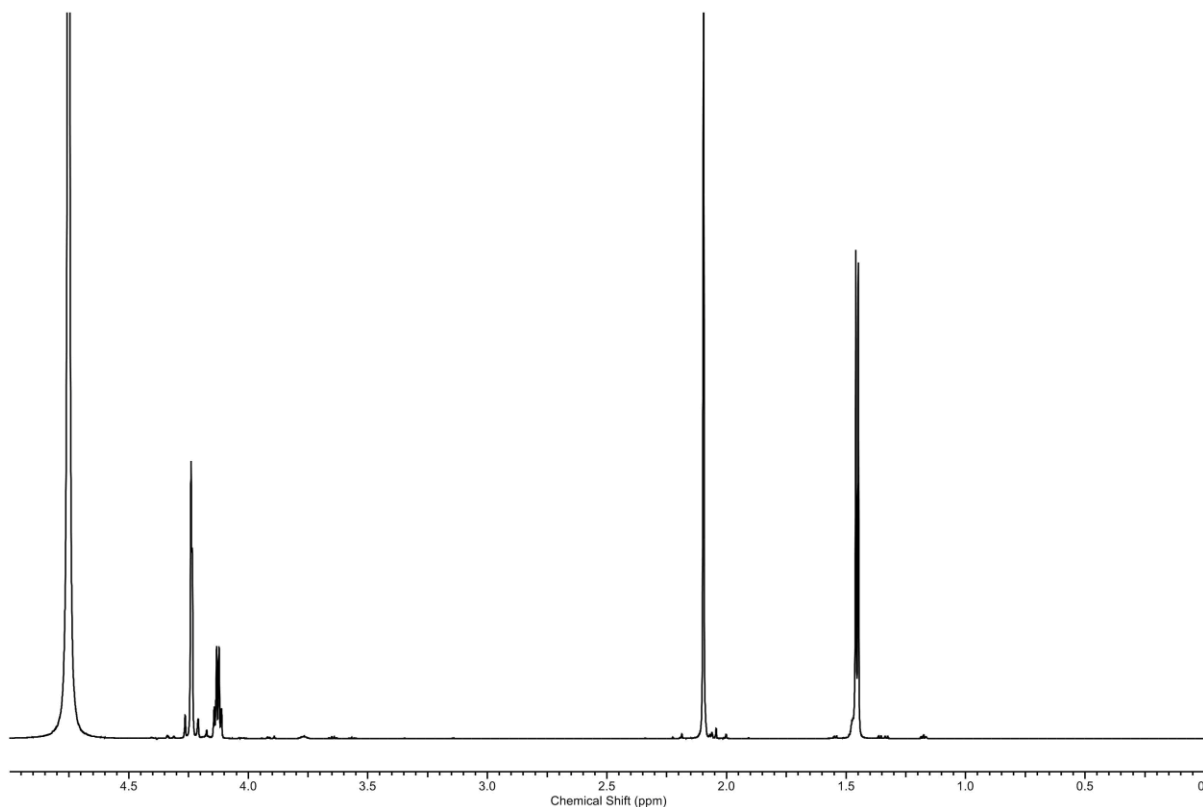

Figure S121:  $^1\text{H}$  NMR (700 MHz,  $\text{D}_2\text{O}$ , zg30, 0.0-5.0 ppm) spectrum to show **3A**.

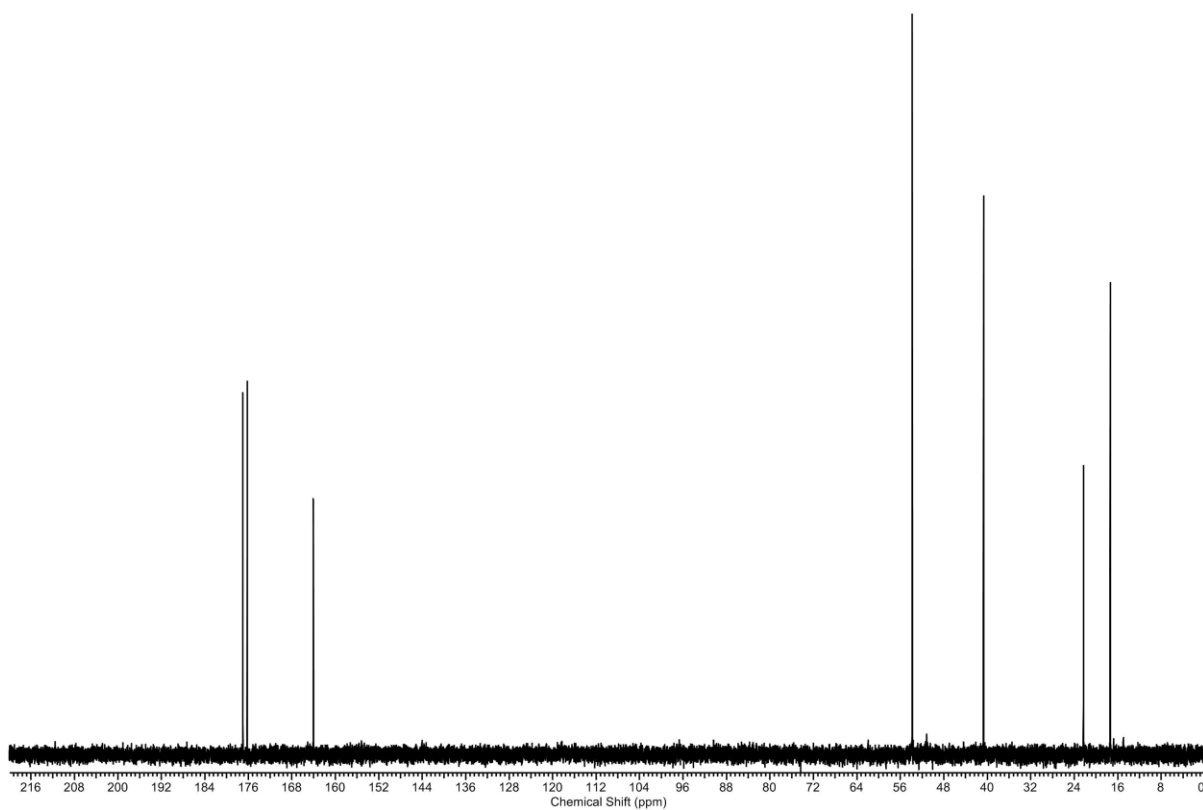

**Figure S122:**  $^{13}\text{C}$  NMR (176.1 MHz,  $\text{H}_2\text{O}/\text{D}_2\text{O}$  9:1, zg30, 0-220 ppm) spectrum to show **3A**.

General procedure for the hydrolysis of authentic amidines

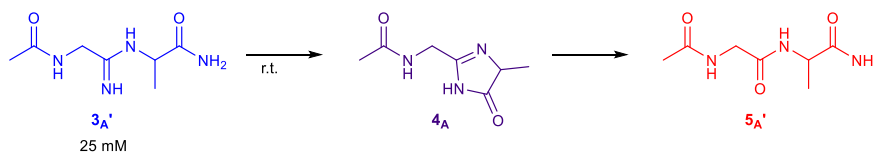

Amidines **3A'** (5 mg, 0.025 mmol) and MSM (30 mM) [internal standard] were dissolved in  $\text{H}_2\text{O}$  (800  $\mu\text{L}$ ). The solution was adjusted to the desired pH with 4 M NaOH,  $\text{D}_2\text{O}$  (50  $\mu\text{L}$ ) was added and volume was increased to 1 mL with  $\text{H}_2\text{O}$ . NMR spectra were acquired periodically.

Hydrolysis of authentic amidines **3**'

Hydrolysis of **3A**' at pH 7 in phosphate buffer (100 mM)

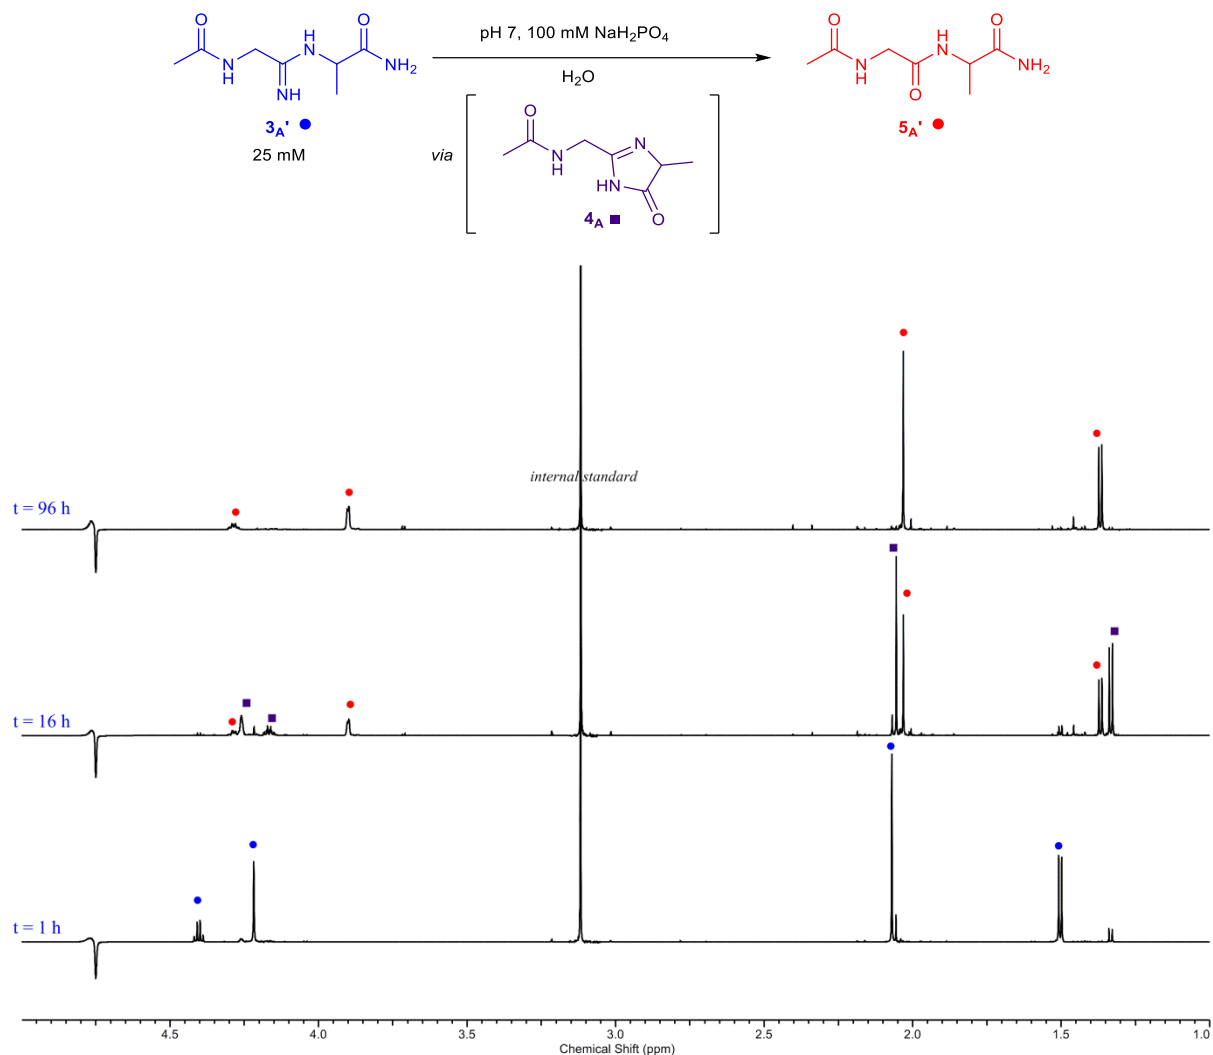

**Figure S123.**  $^1H$  NMR (700 MHz,  $H_2O/D_2O$  9:1, noesygppr1d, 1.0-5.0 ppm) spectra to show the hydrolysis of **3A**' (25 mM) in phosphate buffer (100 mM) and MSM (30 mM) as an internal standard at pH 7.0 and room temperature.

| time/ h | <b>3A</b> ' / % | <b>4A</b> ' / % | <b>5A</b> ' / % |
|---------|-----------------|-----------------|-----------------|
| 1       | 88              | 11              | 0               |
| 8       | 27              | 54              | 14              |
| 16      | 7               | 50              | 33              |
| 24      | 3               | 36              | 47              |
| 36      | 2               | 21              | 60              |
| 48      | 2               | 12              | 67              |
| 72      | 2               | 4               | 76              |
| 96      | 2               | 2               | 77              |
| 144     | 2               | 0               | 76              |

**Table S24.** Hydrolysis of **3A**' at pH 7 in phosphate buffer (100 mM).

Hydrolysis of **3A'** at pH 7

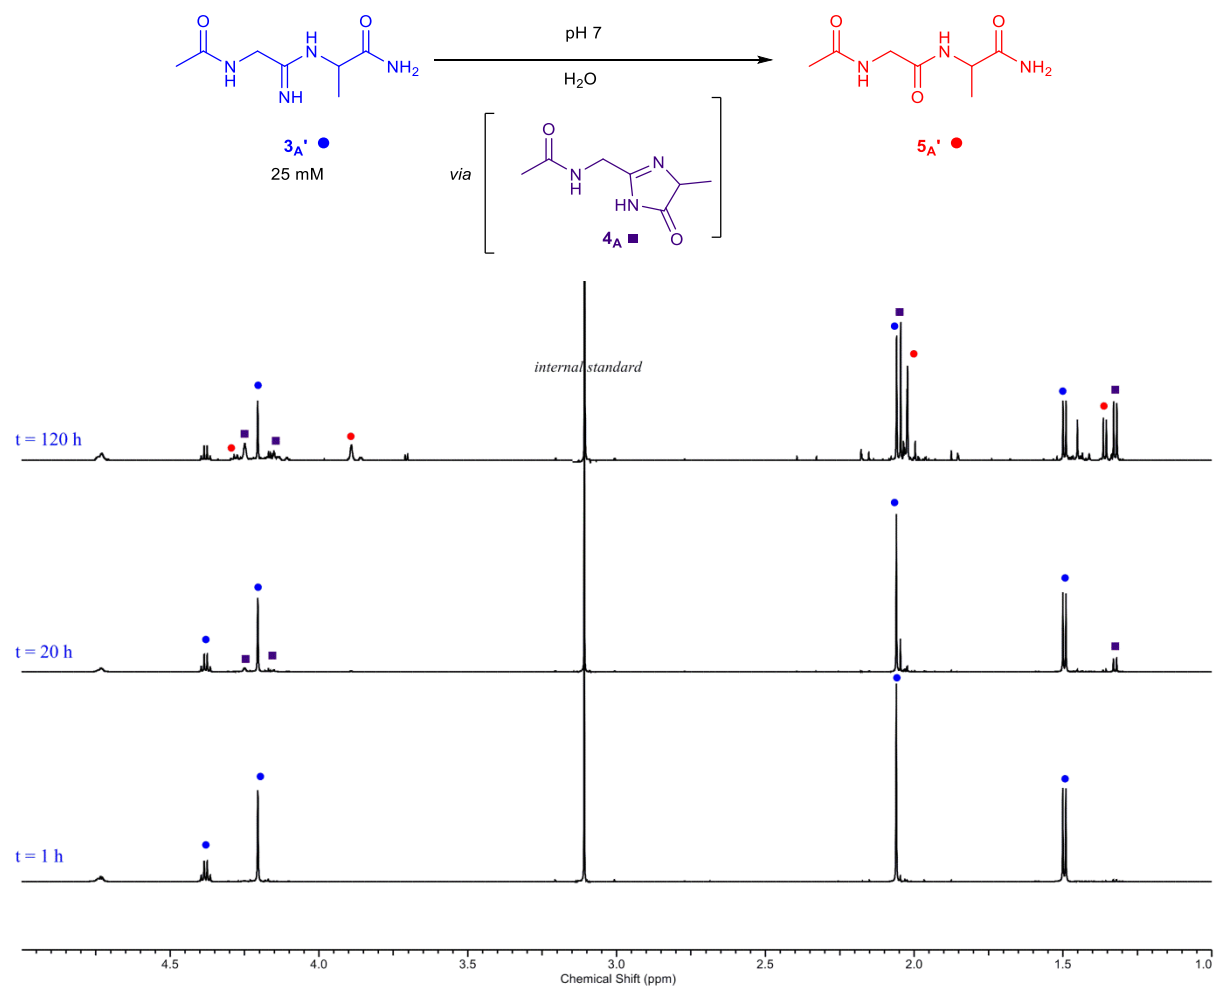

**Figure S124.** <sup>1</sup>H NMR (700 MHz, H<sub>2</sub>O/D<sub>2</sub>O 9:1, noesygppr1d, 1.0-5.0 ppm) spectra to show the hydrolysis of **3A'** (25 mM) with MSM (30 mM) as an internal standard at pH 7.0 and room temperature.

| time/ h | <b>3A'</b> / % | <b>4A'</b> / % | <b>5A'</b> / % |
|---------|----------------|----------------|----------------|
| 1       | 99             | 3              | 0              |
| 3       | 97             | 4              | 0              |
| 12      | 92             | 10             | 1              |
| 20      | 84             | 14             | 2              |
| 46      | 67             | 23             | 6              |
| 60      | 53             | 24             | 9              |
| 120     | 32             | 24             | 19             |

**Table S25.** Hydrolysis of **3A'** at pH 7

Hydrolysis of **3A'** at pH 9

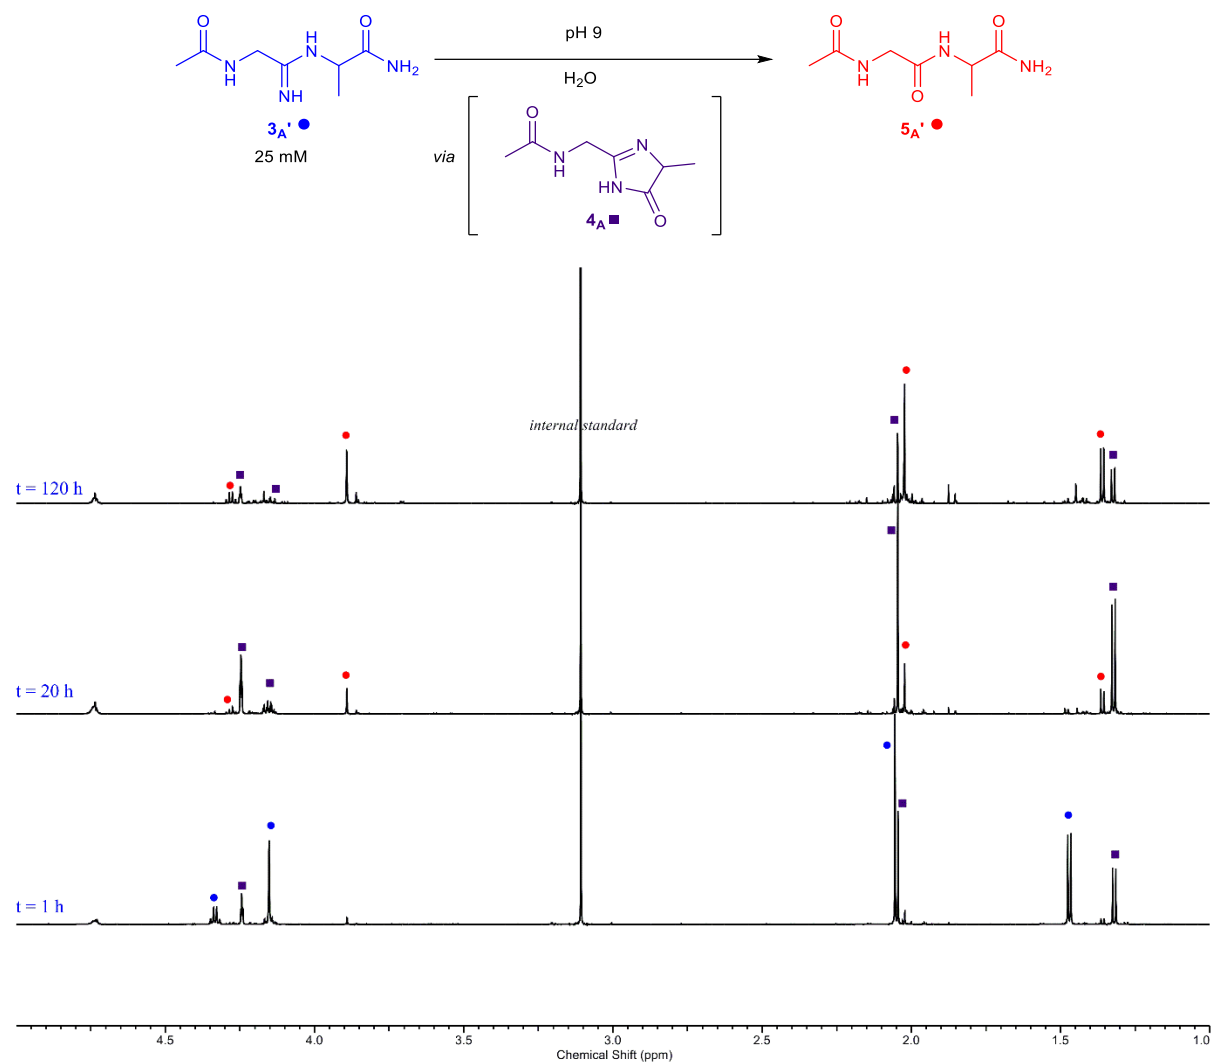

**Figure S125.**  $^1\text{H}$  NMR (700 MHz,  $\text{H}_2\text{O}/\text{D}_2\text{O}$  9:1, noesygppr1d, 1.0-5.0 ppm) spectra to show the hydrolysis of **3A'** (25 mM) with MSM (30 mM) as an internal standard at pH 9.0 and room temperature.

| time/ h | <b>3A'</b> / % | <b>4A'</b> / % | <b>5A'</b> / % |
|---------|----------------|----------------|----------------|
| 1       | 81             | 37             | 4              |
| 3       | 46             | 59             | 8              |
| 12      | 18             | 78             | 14             |
| 20      |                | 75             | 18             |
| 46      |                | 54             | 28             |
| 60      |                | 45             | 33             |
| 120     |                | 22             | 42             |

**Table S26.** Hydrolysis of **3A'** at pH 9.

Hydrolysis of **3A'** at pH 10

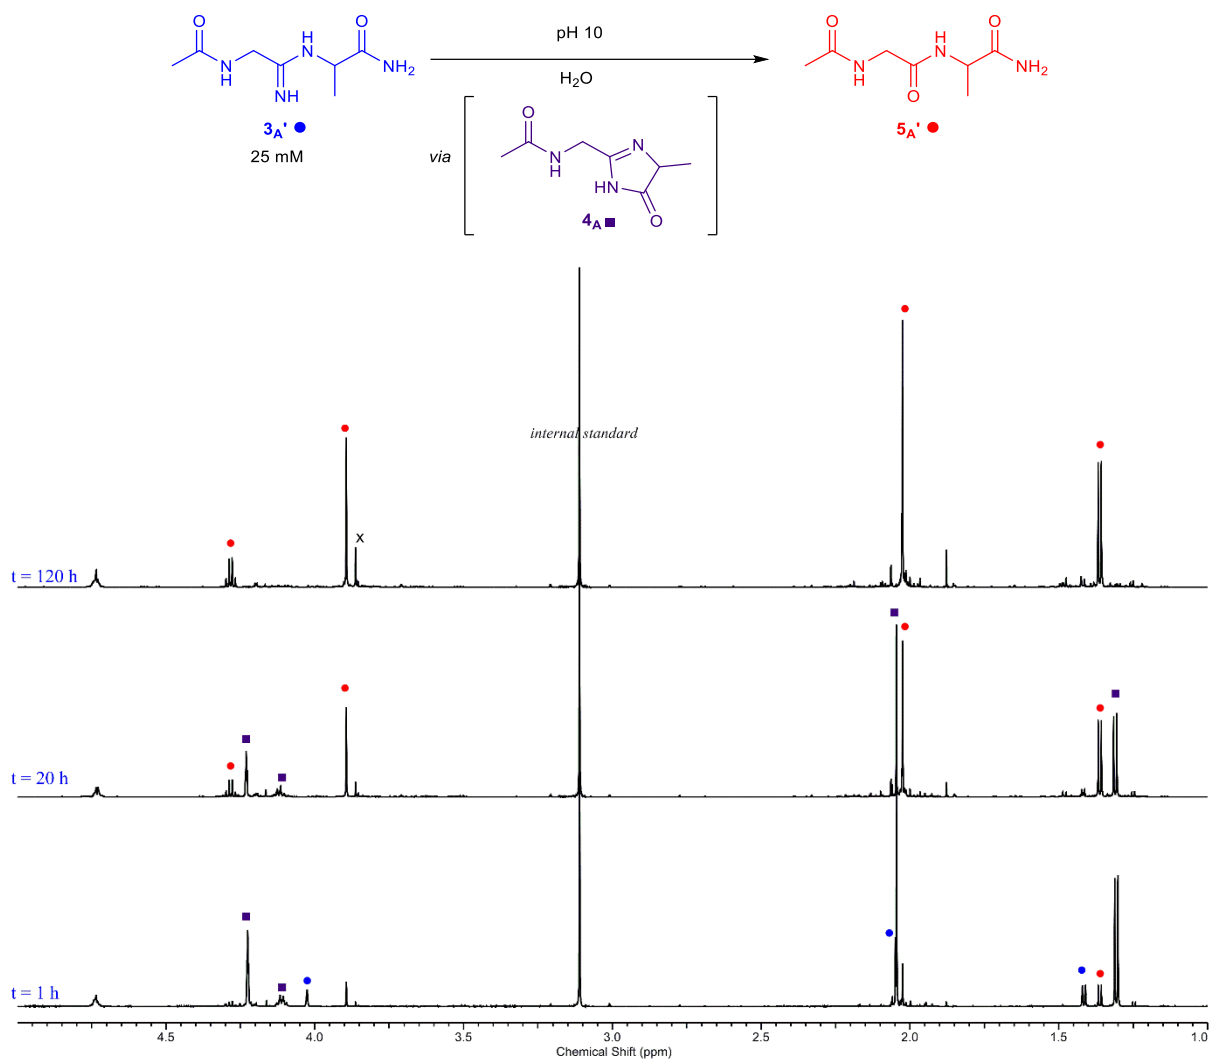

**Figure S126.**  $^1\text{H}$  NMR (700 MHz,  $\text{H}_2\text{O}/\text{D}_2\text{O}$  9:1, noesygppr1d, 1.0-5.0 ppm) spectra to show the hydrolysis of **3A'** (25 mM) with MSM (30 mM) as an internal standard at pH 10.0 and room temperature.

| time/ h | <b>3A'</b> / % | <b>4A'</b> / % | <b>5A'</b> / % |
|---------|----------------|----------------|----------------|
| 1       | 15             | 63             | 9              |
| 3       | 2              | 62             | 15             |
| 12      | 0              | 43             | 27             |
| 20      | 0              | 33             | 34             |
| 46      | 0              | 12             | 47             |
| 60      | 0              | 6              | 52             |
| 120     | 0              | 4              | 55             |

**Table S27.** Hydrolysis of **3A'** at pH 10.

Hydrolysis of **3G'** at pH 9

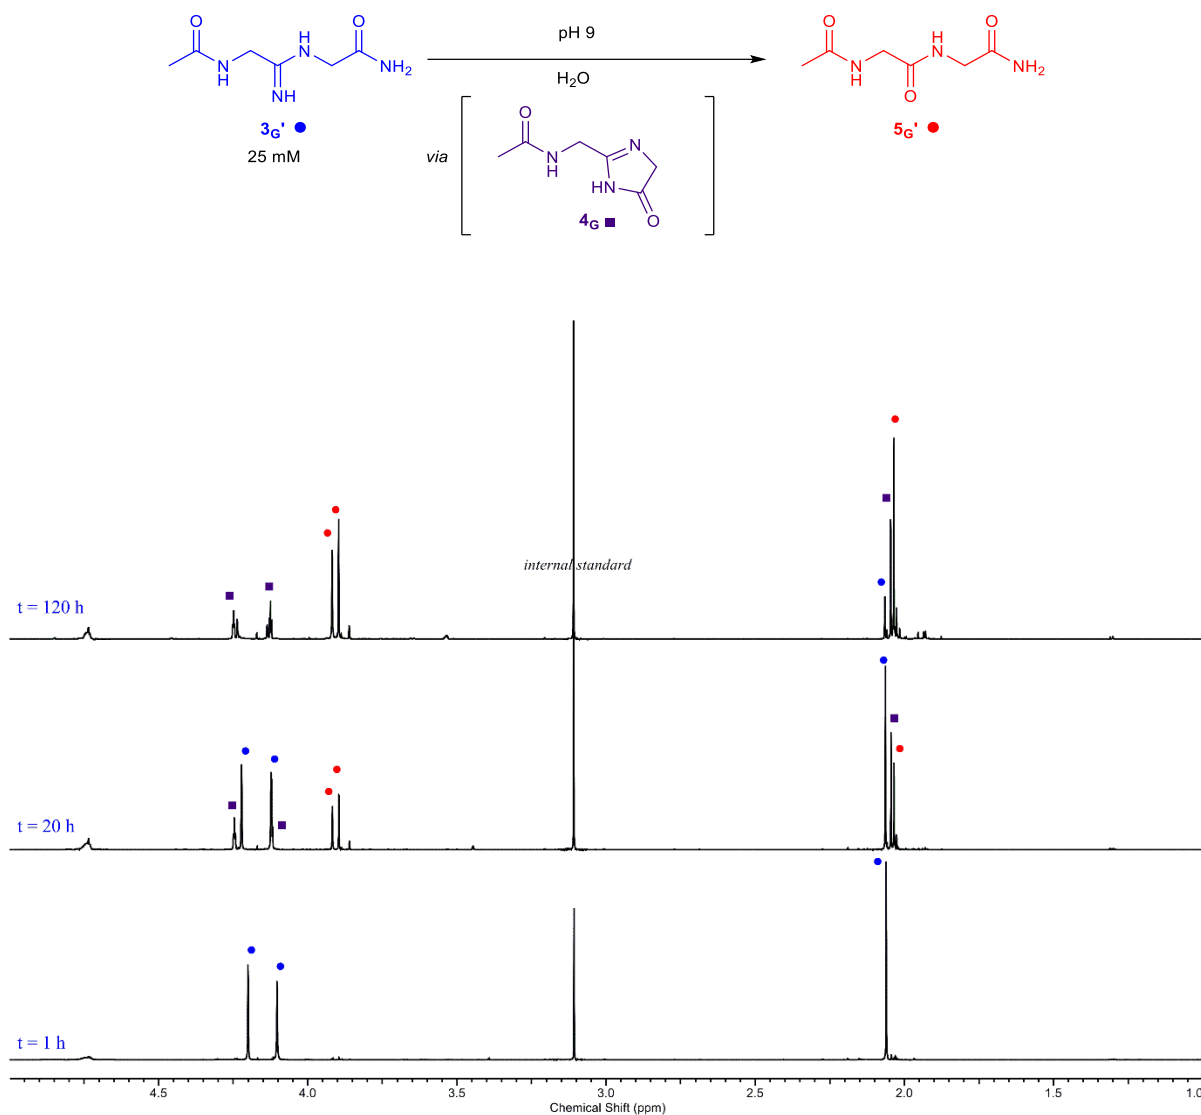

**Figure S127.** <sup>1</sup>H NMR (700 MHz, H<sub>2</sub>O/D<sub>2</sub>O 9:1, noesygppr1d, 1.0-5.0 ppm) spectra to show the hydrolysis of **3G'** (25 mM) with MSM (30 mM) as an internal standard at pH 9.0 and room temperature.

| time/ h | <b>3G'</b> / % | <b>4G'</b> / % | <b>5G'</b> / % |
|---------|----------------|----------------|----------------|
| 1       | 86             | 4              | 2              |
| 4       | 77             | 10             | 6              |
| 8       | 69             | 16             | 10             |
| 14      | 57             | 22             | 15             |
| 24      | 43             | 28             | 20             |
| 36      | 34             | 30             | 25             |
| 48      | 27             | 31             | 29             |
| 81      | 18             | 27             | 36             |
| 118     | 10             | 22             | 40             |

**Table S28.** Hydrolysis of **3G'** at pH 9

Hydrolysis of **3G'** at pH 9 in the presence of 3-mercaptopropionic acid **6b**

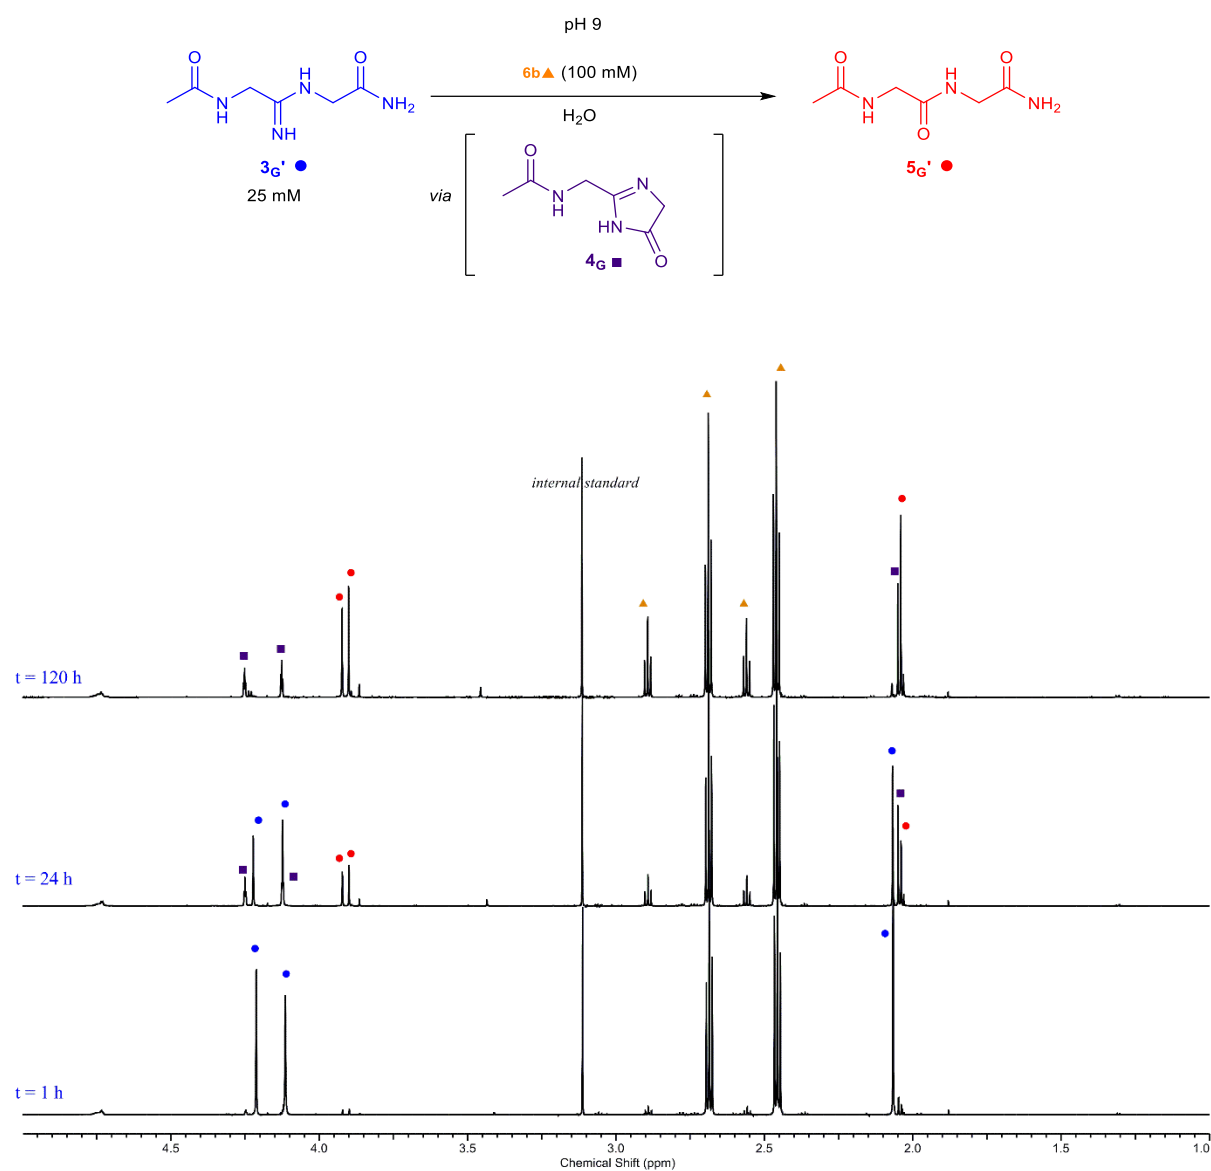

**Figure S128.** <sup>1</sup>H NMR (700 MHz, H<sub>2</sub>O/D<sub>2</sub>O 9:1, noesygppr1d, 1.0-5.0 ppm) spectra to show the hydrolysis of **3G'** (25 mM) in the presence of 3-mercaptopropionic acid (**6b**, 100 mM) with MSM (30 mM) as an internal standard at pH 9.0 and room temperature.

| time/ h | <b>3G'</b> / % | <b>4G'</b> / % | <b>5G'</b> / % |
|---------|----------------|----------------|----------------|
| 1       | 95             | 7              | 3              |
| 4       | 89             | 11             | 6              |
| 8       | 77             | 18             | 10             |
| 14      | 63             | 25             | 14             |
| 24      | 46             | 33             | 21             |
| 36      | 32             | 39             | 28             |
| 48      | 23             | 39             | 32             |
| 118     | 10             | 37             | 43             |

**Table S29.** Hydrolysis of **3G'** at pH 9 in the presence of 3-mercaptopropionic acid **6b**



Hydrolysis of **3G'** at pH 9 in the presence of L-alanine (**2A**)

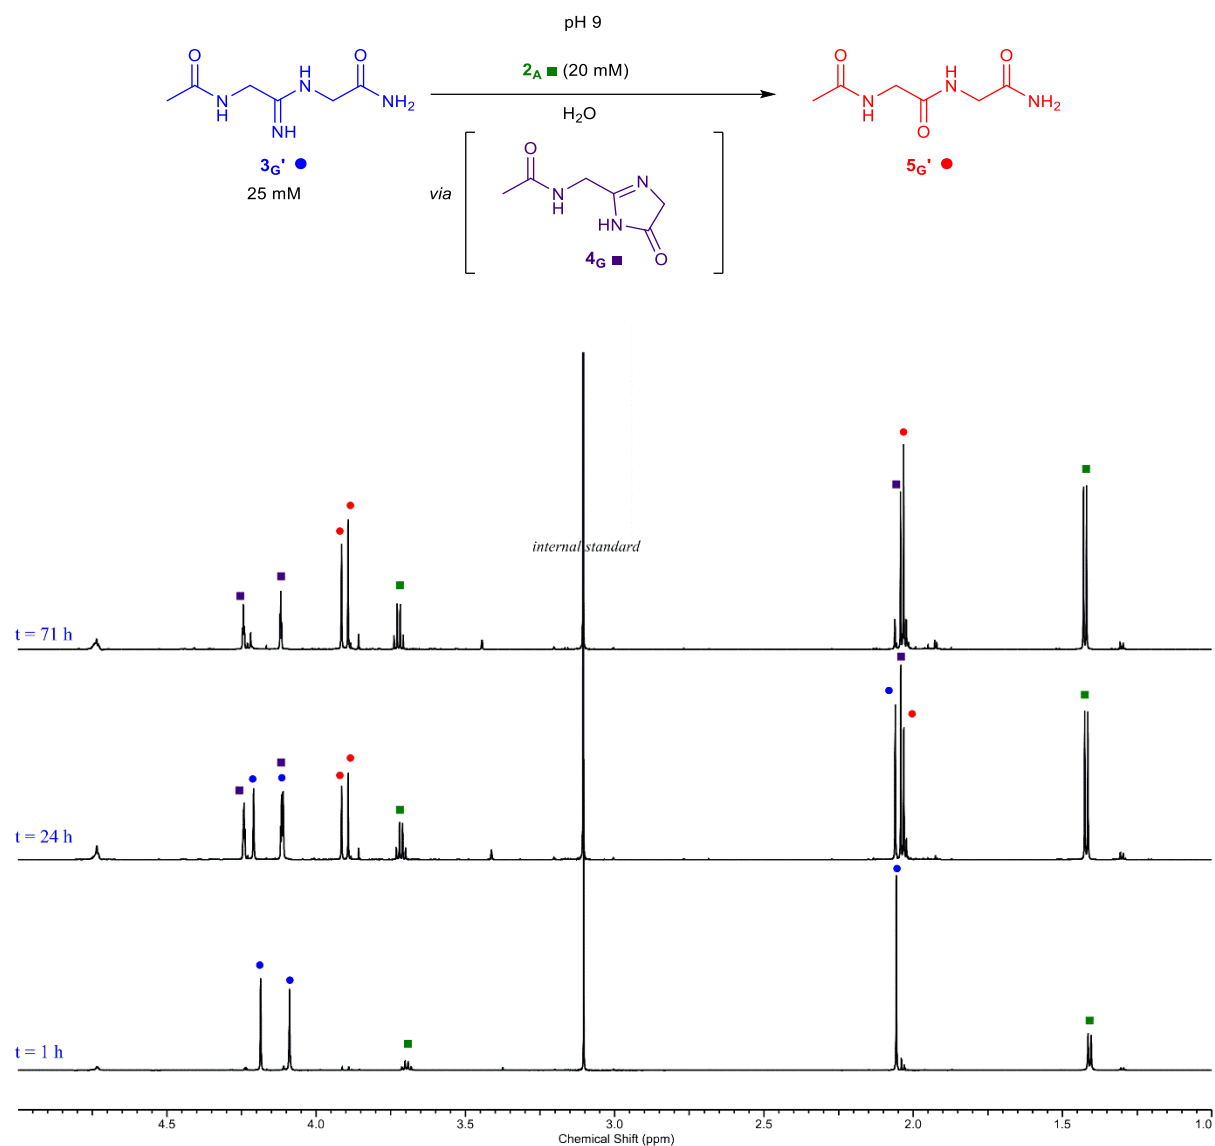

**Figure S129.**  $^1\text{H}$  NMR (700 MHz,  $\text{H}_2\text{O}/\text{D}_2\text{O}$  9:1, noesygppr1d, 1.0-5.0 ppm) spectra to show the hydrolysis of **3G'** (25 mM) in the presence of alanine (**2A**, 20 mM) with MSM (30 mM) as an internal standard at pH 9.0 and room temperature.

| time/ h | <b>3G'</b> / % | <b>4G'</b> / % | <b>5G'</b> / % |
|---------|----------------|----------------|----------------|
| 1       | 87             | 6              | 3              |
| 3       | 76             | 14             | 7              |
| 7       | 62             | 23             | 12             |
| 15      | 43             | 32             | 20             |
| 24      | 30             | 37             | 25             |
| 35      | 20             | 36             | 31             |
| 48      | 14             | 34             | 35             |
| 71      | 9              | 29             | 42             |

**Table S30.** Hydrolysis of **3G'** at pH 9 in the presence of L-alanine (**2A**).

Hydrolysis of **3G'** at pH 9 in the presence of L-alaninamide (**2A'**)

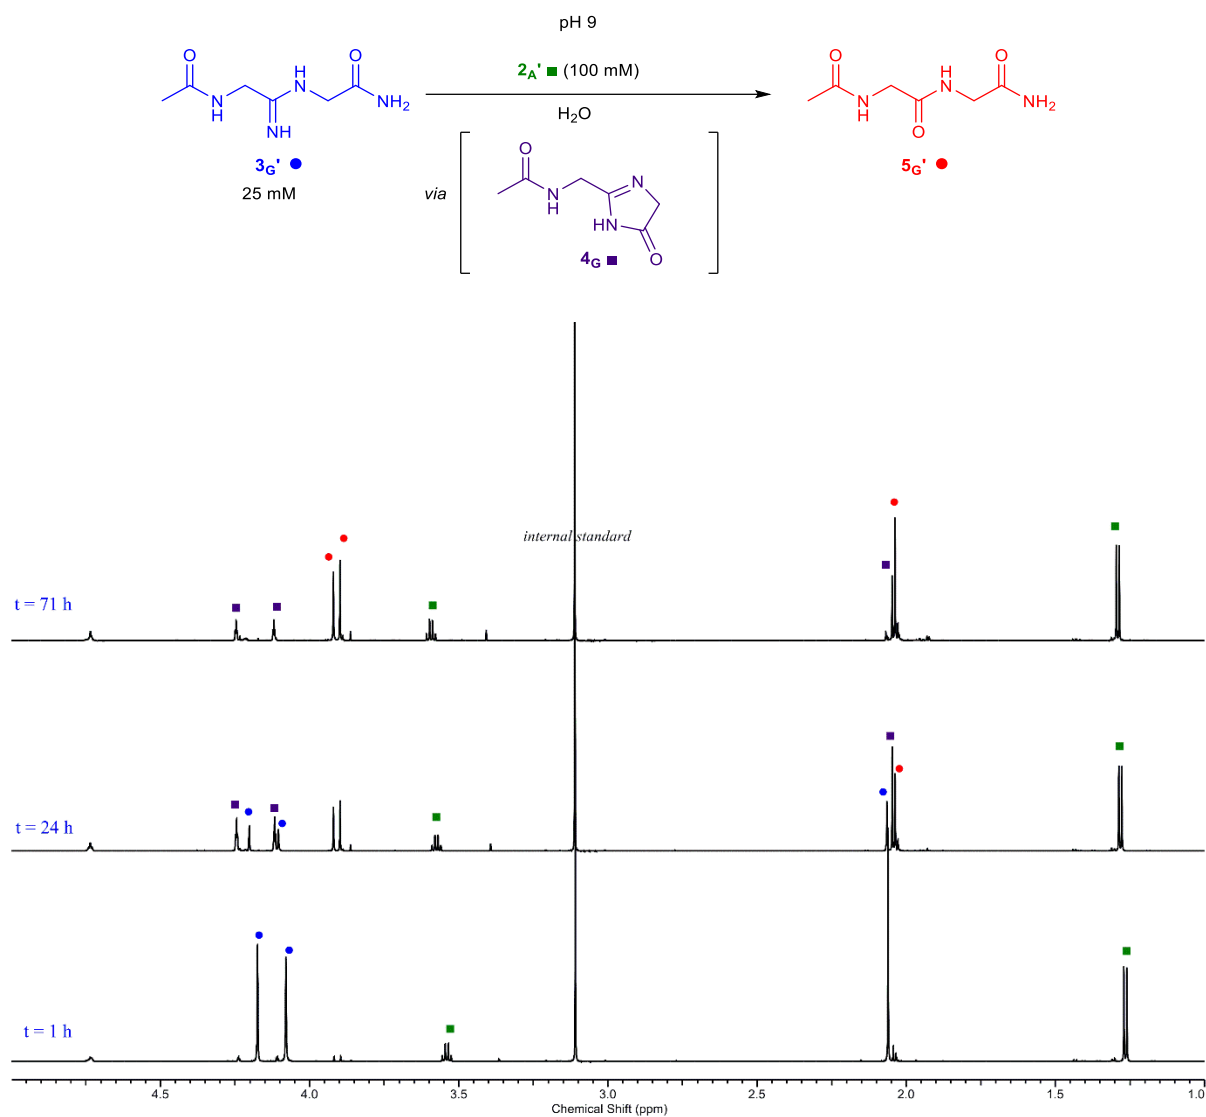

**Figure S130.** <sup>1</sup>H NMR (700 MHz, H<sub>2</sub>O/D<sub>2</sub>O 9:1, noesygppr1d, 1.0-5.0 ppm) spectra to show the hydrolysis of **3G'** (25 mM) in the presence of alaninamide (**2A'**, 20 mM) with MSM (30 mM) as an internal standard at pH 9.0 and room temperature.

| time/ h | <b>3G'</b> / % | <b>4G'</b> / % | <b>5G'</b> / % |
|---------|----------------|----------------|----------------|
| 1       | 90             | 6              | 2              |
| 3       | 73             | 18             | 10             |
| 7       | 54             | 28             | 16             |
| 15      | 33             | 37             | 24             |
| 24      | 22             | 42             | 30             |
| 35      | 13             | 41             | 36             |
| 48      | 10             | 36             | 41             |
| 71      | 3              | 34             | 49             |

**Table S31.** Hydrolysis of **3G'** at pH 9 in the presence of L-alaninamide (**2A'**).

No incorporation of either alanine **2A** or alaninamide **2A'** was observed.

Hydrolysis of **3<sub>A</sub>**

Hydrolysis of **3<sub>A</sub>** at pH 7

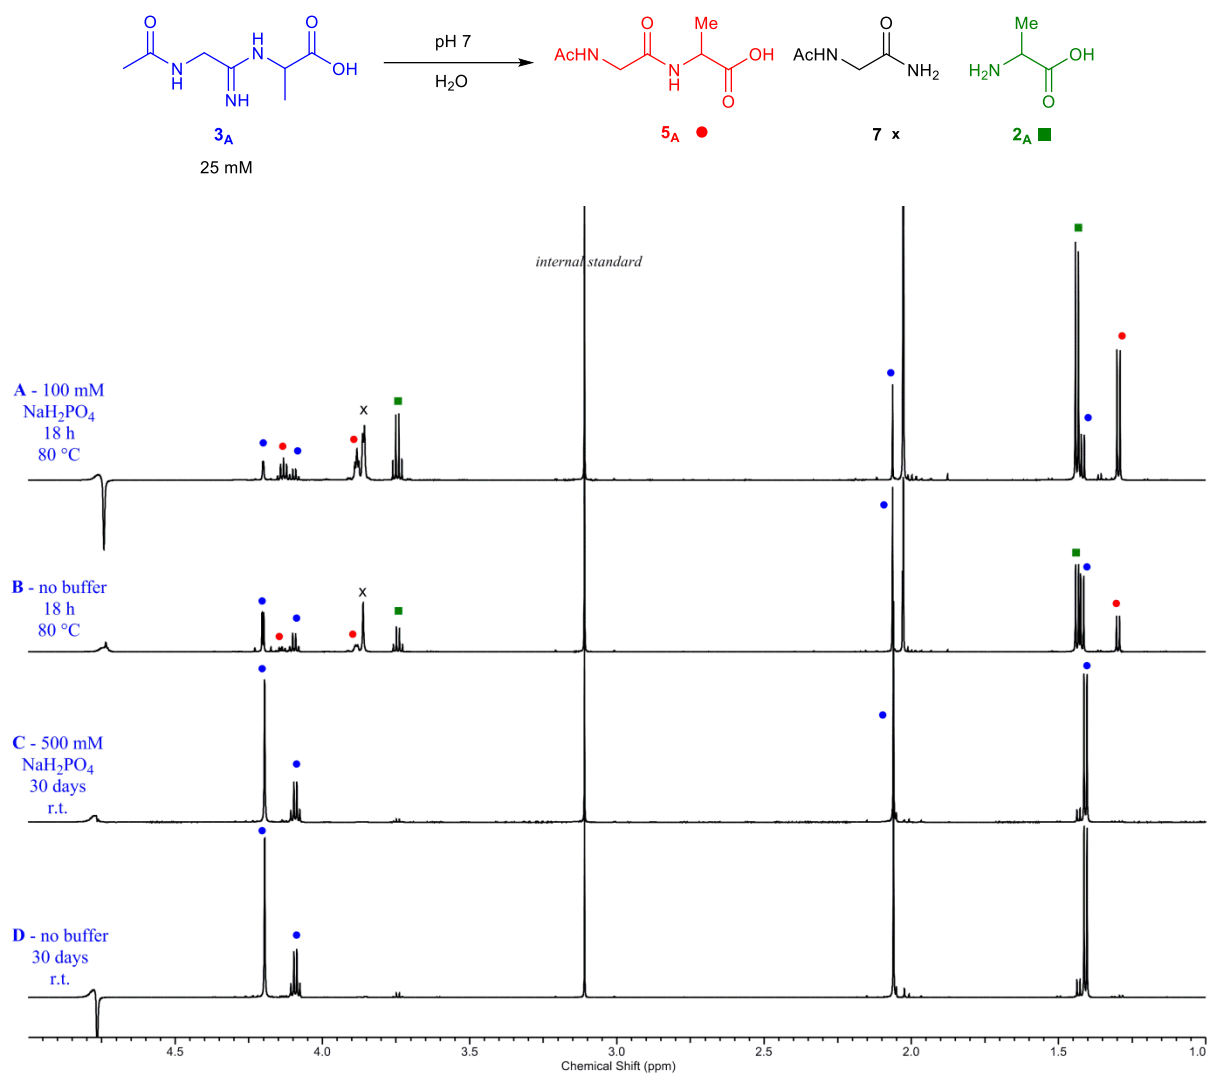

**Figure S131.**  $^1\text{H}$  NMR (700 MHz,  $\text{H}_2\text{O}/\text{D}_2\text{O}$  9:1, noesygppr1d, 1.0-5.0 ppm) spectra to show the hydrolysis of **3<sub>A</sub>** (25 mM) at pH 7.0 **A** after 18 h at 80°C in phosphate buffer (100 mM); **B** after 18 h at 80°C; **C** after 30 days at room temperature in phosphate buffer (500 mM).

Hydrolysis of **3<sub>A</sub>** at pH 9

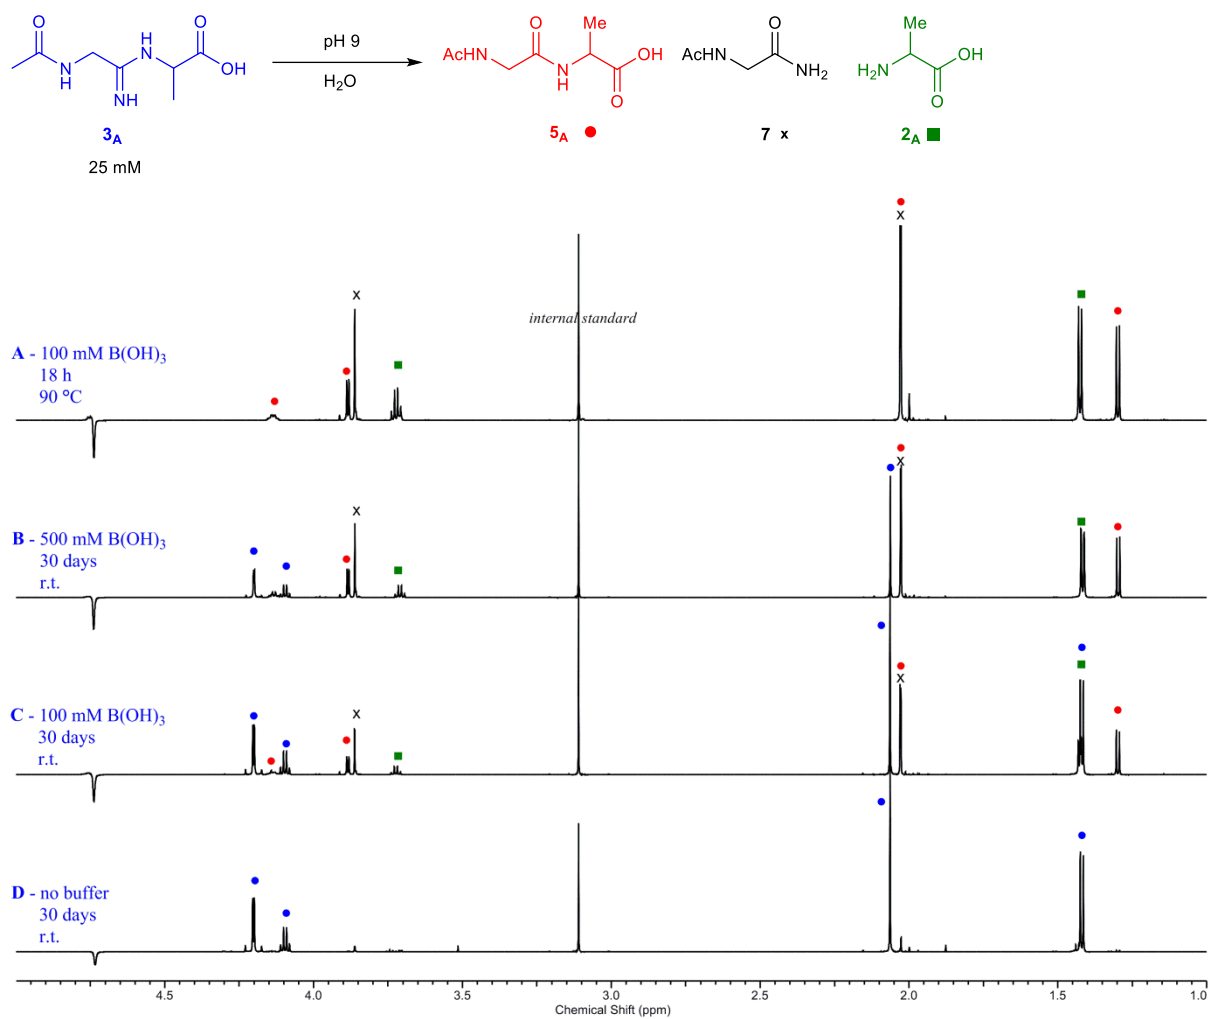

**Figure S132.**  $^1\text{H}$  NMR (700 MHz,  $\text{H}_2\text{O}/\text{D}_2\text{O}$  9:1, noesygppr1d, 1.0-5.0 ppm) spectra to show the hydrolysis of **3<sub>A</sub>** (25 mM) at pH 9.0 **A** after 18 h at 80 °C in the presence of 100 mM  $\text{B}(\text{OH})_3$ ; **B** after 30 days at room temperature in borate buffer (500 mM); **C** after 30 days at room temperature in borate buffer (100 mM); **D** after 30 days at room temperature

*Coupling of N-acetylglycine nitrile 1 with L-lysynamide 2κ' at pH 8.5 and room temperature*

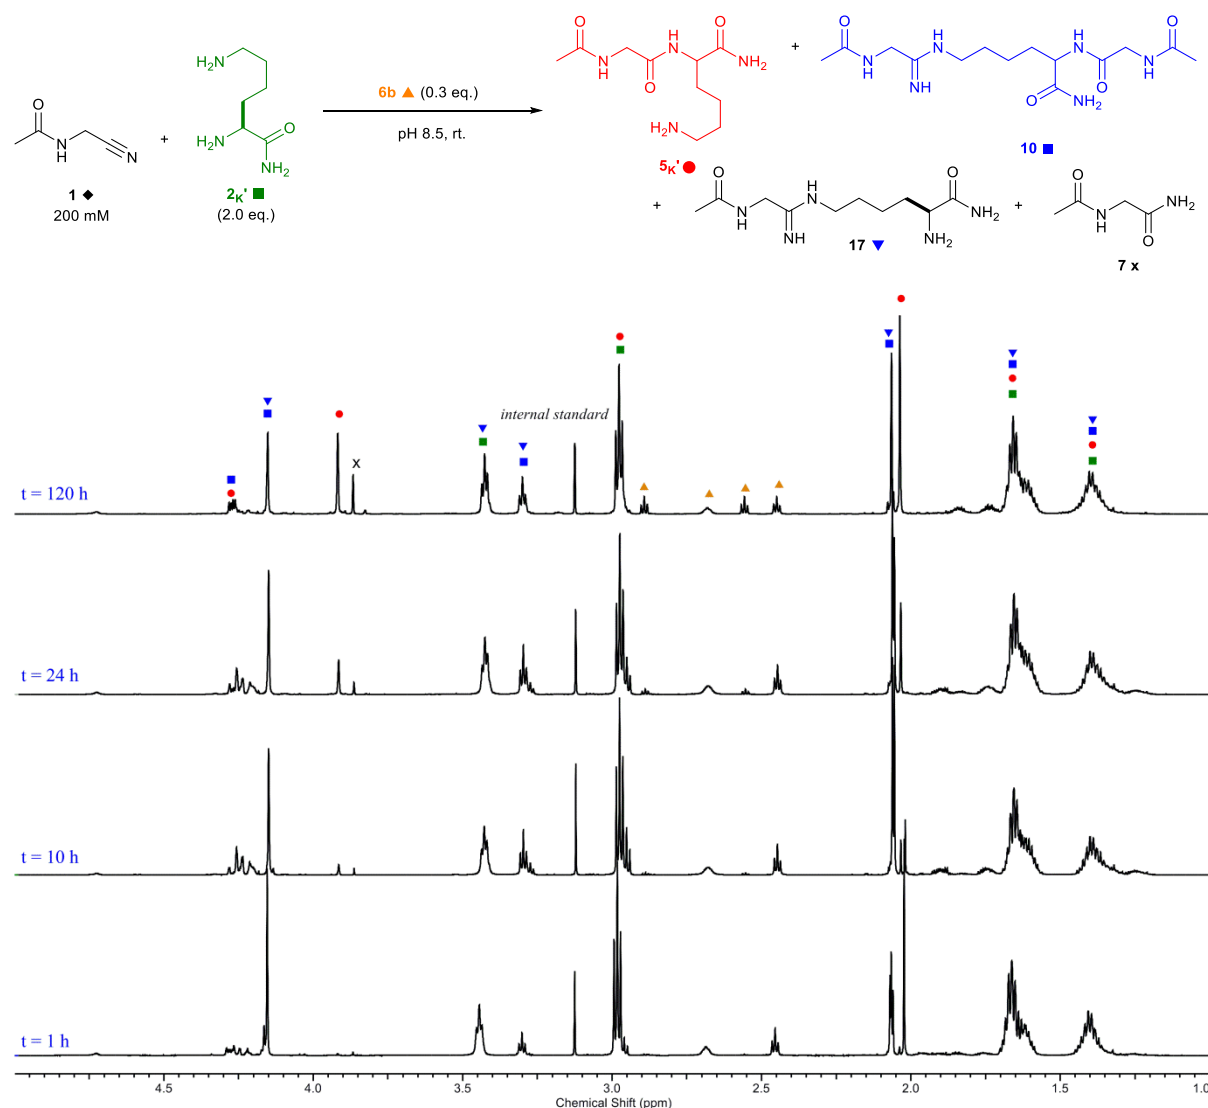

**Figure S133:**  $^1\text{H}$  NMR (700 MHz,  $\text{H}_2\text{O}/\text{D}_2\text{O}$  9:1, noesygppr1d, 1.0–5.0 ppm) spectrum to show the reaction of N-acetyl glycine nitrile (**1**, 200 mM) with L-lysynamide (**2κ'**, 400 mM) and 3-mercapto-propanoic acid (**6b**, 60 mM) with MSM (7 mM) as an internal standard at pH 8.5 and room temperature.

$^1\text{H}$  NMR (700 MHz,  $\text{H}_2\text{O}/\text{D}_2\text{O}$  9:1)  $\alpha$ -peptide (partial assignment) (●, ■):  $\delta_{\text{H}}$  4.29 (1H, dd,  $J = 9.4, 4.9$  Hz, Lys- $\alpha$ -CHCONH<sub>2</sub>), 3.94 (2H, s, CH<sub>2</sub>CONH), 2.06 (3H, s, H<sub>3</sub>C(CO));  $\epsilon$ -amidine (partial assignment) (■, ▼):  $\delta_{\text{H}}$  4.18 (2H, s, CH<sub>2</sub>C(NH)NH), 3.32 (2H, t,  $J = 7.0$  Hz, Lys- $\epsilon$ -CH<sub>2</sub>NH<sub>2</sub>), 2.09 (3H, s, H<sub>3</sub>C(CO)); L-lysynamide, **2κ'** (partial assignment) (■):  $\delta_{\text{H}}$  3.45 (1H, t,  $J = 6.4$  Hz, CHCONH<sub>2</sub>), 3.00 (2H, t,  $J = 7.5$  Hz,  $\epsilon$ -CH<sub>2</sub>NH<sub>2</sub>); N-acetylglycinamide, **7** (×) (partial assignment):  $\delta_{\text{H}}$  3.89 (2H, d, CH<sub>2</sub>).

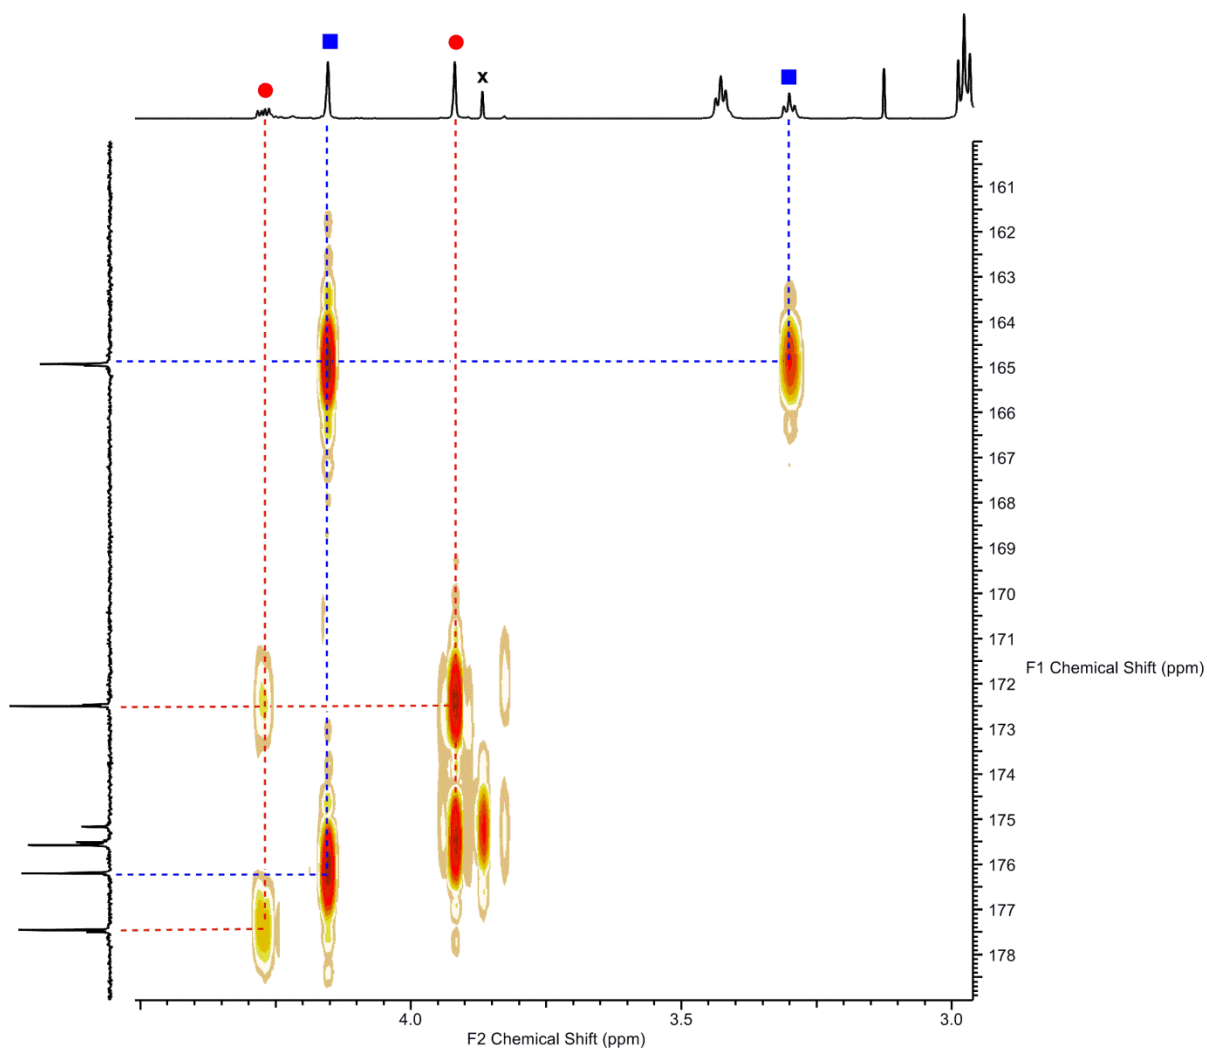

**Figure S134:**  $^1\text{H}$ - $^{13}\text{C}$  HMBC ( $^1\text{H}$ : 700 MHz [3.9-4.5 ppm],  $^{13}\text{C}$ : 176 MHz [160-180 ppm],  $\text{H}_2\text{O}/\text{D}_2\text{O}$  9:1) spectrum showing the  $^2\text{J}_{\text{CH}}$  and  $^3\text{J}_{\text{CH}}$  coupling of the Lys- $\alpha\text{H}$  in **5k'** and **10** at 4.29 ppm with resonances at 172.5 and 177.4 ppm, characteristic of peptide formation, alongside the  $^3\text{J}_{\text{CH}}$  coupling of the Lys- $\epsilon\text{H}_2$  in **10** and **17** at 3.32 ppm with a resonance at 164.9 ppm, characteristic of amidine formation.

| Entry | $\alpha$ -amide ( <b>5k'</b> + <b>10</b> ) / % | $\epsilon$ -amide ( <b>10</b> + <b>17</b> ) / % | <b>7</b> / % |
|-------|------------------------------------------------|-------------------------------------------------|--------------|
| 1     | 42                                             | 37                                              | 16           |

**Table S32.** Coupling of N-acetylglycine nitrile **1** with L-lysynamide **2k'** at pH 8.5 and room temperature.

Coupling of N-acetylglycine nitrile **1** with L-lysynamide **2k'** at pH 9.0, 80 °C

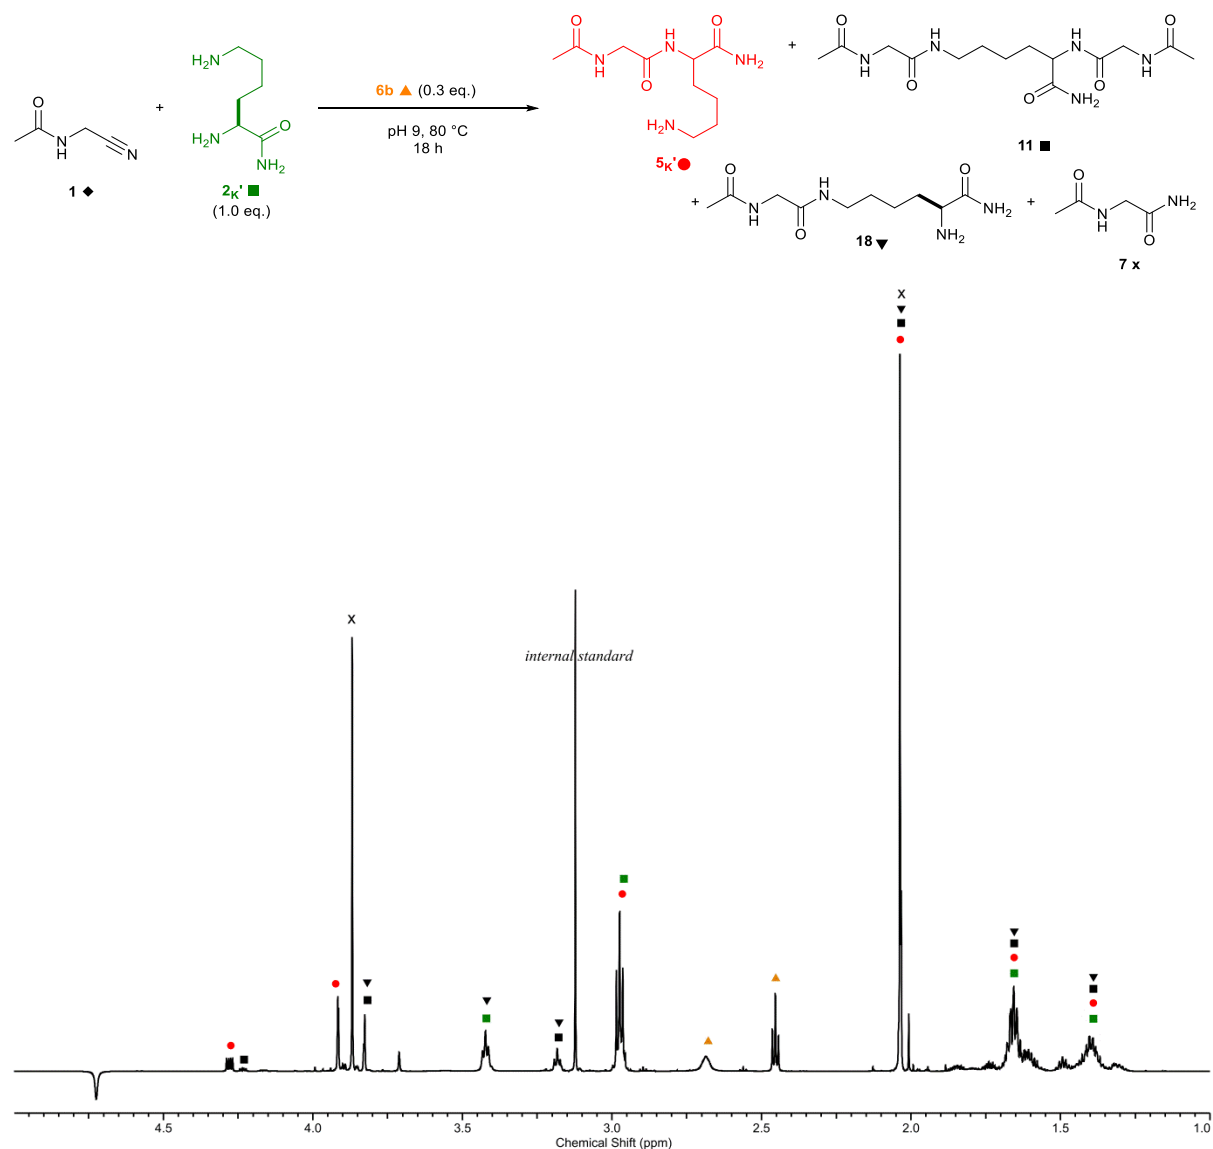

**Figure S135:**  $^1\text{H}$  NMR (700 MHz,  $\text{H}_2\text{O}/\text{D}_2\text{O}$  9:1, noesygppr1d, 1.0-5.0 ppm) spectrum to show the reaction of N-acetyl glycine nitrile (**1**, 200 mM) with L-lysynamide (**2k'**, 200 mM) and 3-mercaptopropanoic acid (**6b**, 60 mM) with MSM (17 mM) as an internal standard at pH 9.0 and 80°C after 18 h.

$\epsilon$ -amide (partial assignment) (■, ▼):  $\delta_{\text{H}}$  3.85 (2H, s,  $\text{CH}_2\text{C}(\text{NH})\text{NH}$ ), 3.21 (1H, t,  $J = 7.0$  Hz,  $\text{Lys-}\epsilon\text{-CH}_2\text{NH}_2$ ), 2.09 (3H, s,  $\text{H}_3\text{C}(\text{CO})$ ).

| Entry | $\alpha$ -amide ( <b>5k'</b> + <b>11</b> ) / % | $\epsilon$ -amide ( <b>11</b> + <b>17</b> ) / % | 7 / % |
|-------|------------------------------------------------|-------------------------------------------------|-------|
| 1     | 20                                             | 15                                              | 59    |

**Table S33.** Coupling of N-acetylglycine nitrile **1** with L-lysynamide **2k'** at pH 9.0, 80 °C

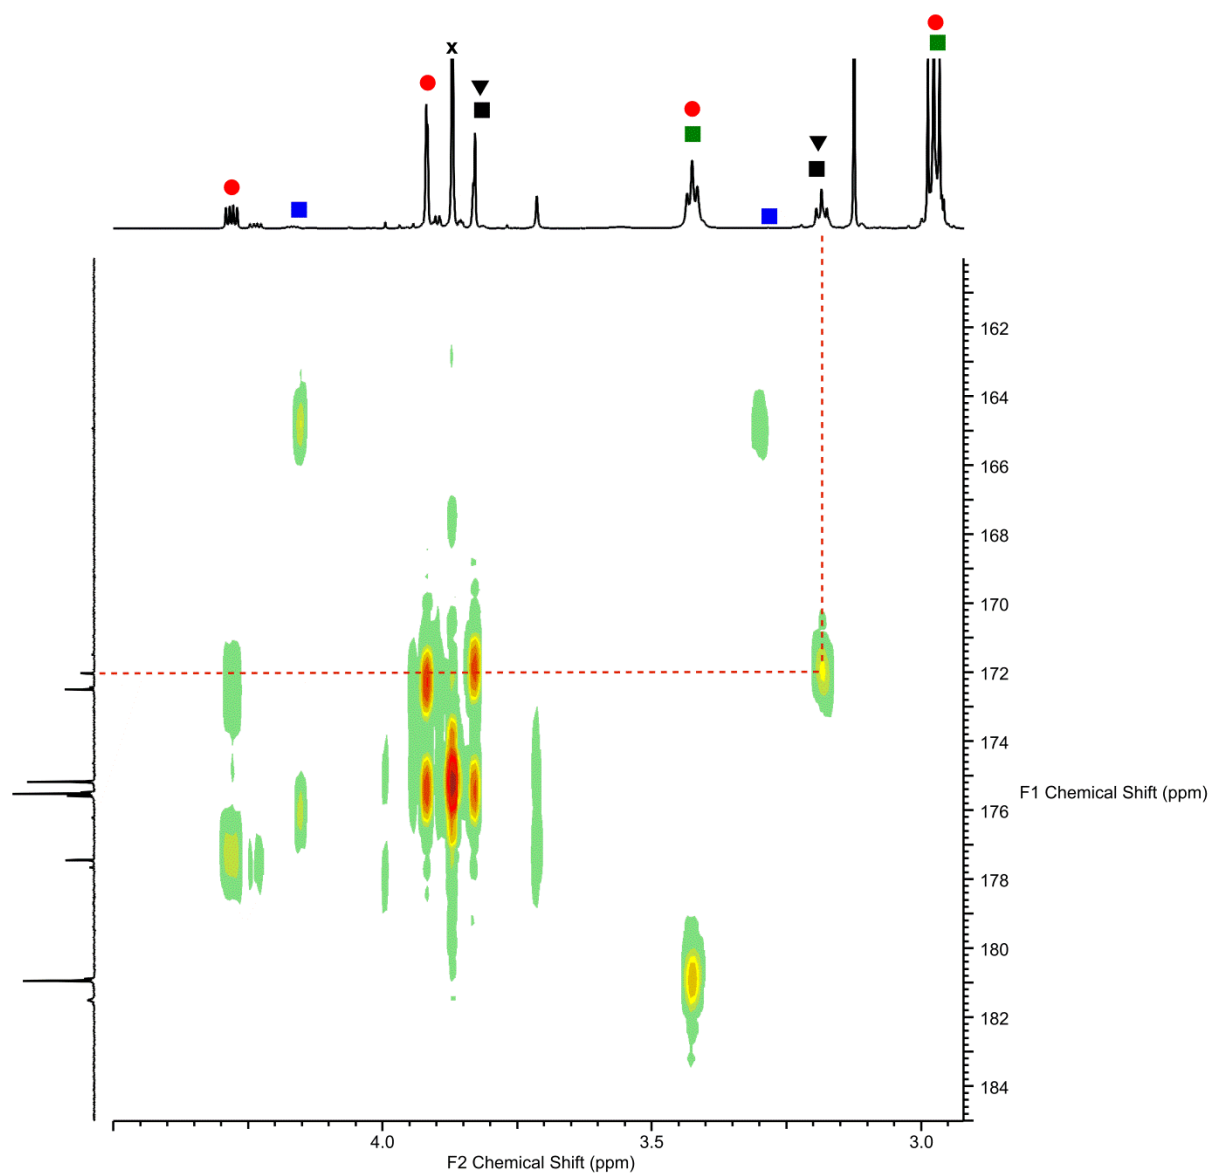

**Figure S136:**  $^1\text{H}$ - $^{13}\text{C}$  HMBC ( $^1\text{H}$ : 700 MHz [3.9-4.5 ppm],  $^{13}\text{C}$ : 176 MHz [160-180 ppm],  $\text{H}_2\text{O}/\text{D}_2\text{O}$  9:1) spectrum showing the  $^3J_{\text{CH}}$  coupling of the  $\text{Lys-}\epsilon\text{H}_2$  in **11** and **18** at 3.21 ppm with a resonance at 164.9 ppm, characteristic of amide formation.



Coupling of N-acetylglycine nitrile **1** with L-lysynamide **2κ'** at pH 7.0, 80°C

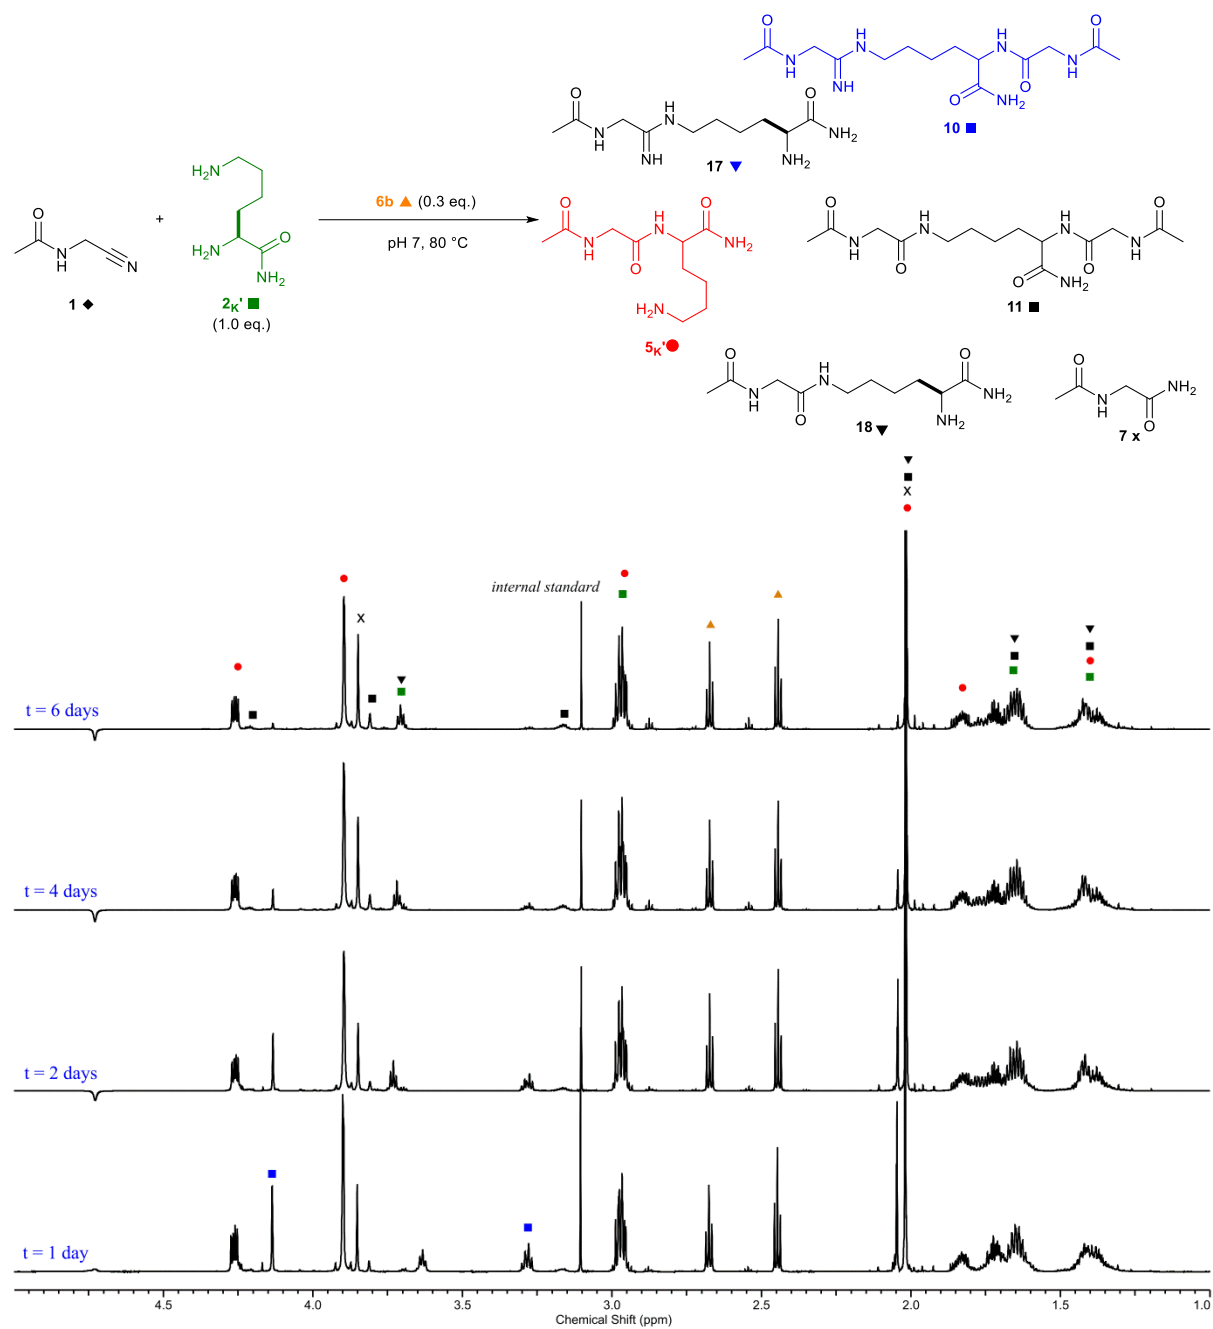

**Figure S137:** <sup>1</sup>H NMR (700 MHz, H<sub>2</sub>O/D<sub>2</sub>O 9:1, noesygppr1d, 1.0-5.0 ppm) spectrum to show the reaction of N-acetyl glycine nitrile (**1**, 200 mM) with L-lysynamide (**2κ'**, 200 mM) and 3-mercaptopropanoic acid (**6b**, 60 mM) with MSM (17 mM) as an internal standard at pH 9.0 and 80°C.

| Entry | time / days | α-amide<br>( <b>5κ'</b> + <b>10</b> + <b>11</b> ) /<br>% | ε-amidine<br>( <b>10</b> + <b>17</b> )<br>/ % | ε-amide<br>( <b>11</b> + <b>18</b> )<br>/ % | 7/ % |
|-------|-------------|----------------------------------------------------------|-----------------------------------------------|---------------------------------------------|------|
| 1     | 1           | 67                                                       | 19                                            | trace                                       | 16   |
| 2     | 2           | 68                                                       | 14                                            | 4                                           | 19   |
| 3     | 4           | 68                                                       | 5                                             | 6                                           | 24   |
| 4     | 6           | 65                                                       | trace                                         | 7                                           | 25   |

**Table S34.** Coupling of N-acetylglycine nitrile **1** with L-lysynamide **2κ'** at pH 7.0, 80 °C

Coupling of *N*-acetyl glycine nitrile **1** with *L*-lysylglycine **2<sub>KG</sub>** at pH 7.0, 80 °C

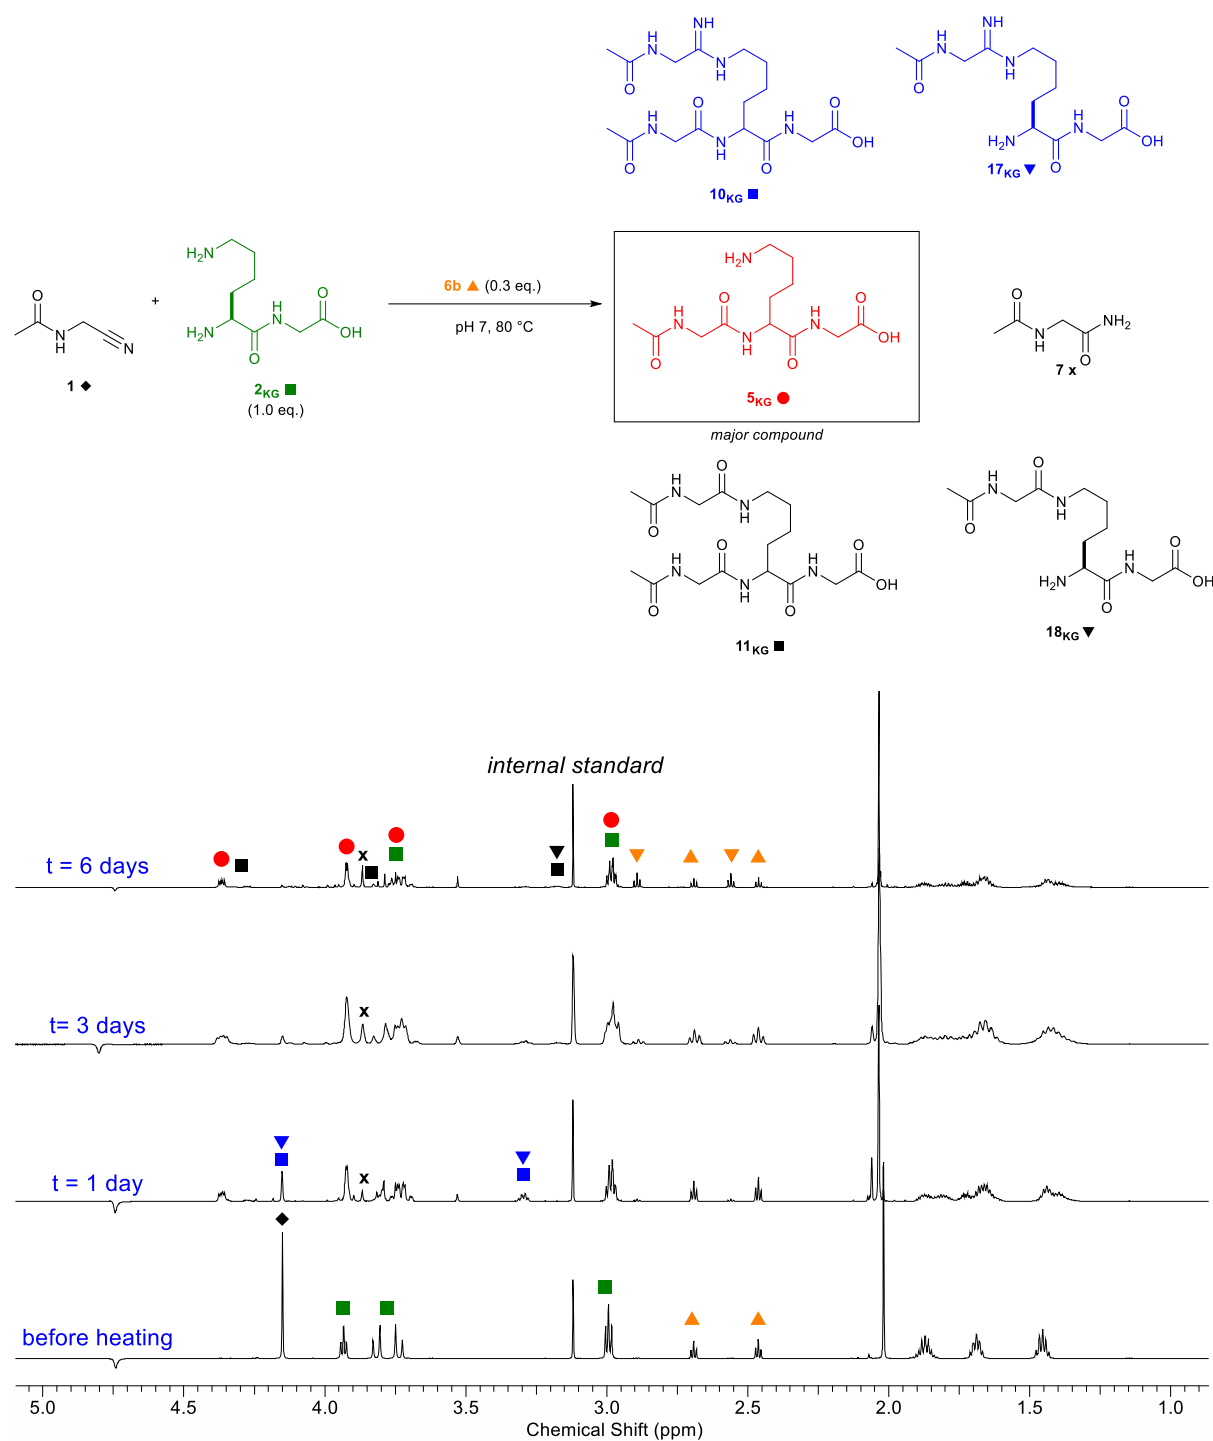

**Figure S138.**  $^1\text{H}$  NMR (700 MHz,  $\text{H}_2\text{O}/\text{D}_2\text{O}$  9:1, noesygppr1d, 1.0–5.0 ppm) spectrum to show the reaction of *N*-acetyl glycine nitrile (**1**, 200 mM) with *L*-lysylglycine (**2<sub>KG</sub>**, 200 mM) and 3-mercaptopropanoic acid (**6b**, 60 mM, 0.3 eq.) with MSM (40 mM) as the internal standard at pH 7.0 and 80 °C. ▼ = 2-carboxyethyl disulfide (formed by aerial oxidation of **6b**).

$^1\text{H}$  NMR (700 MHz,  $\text{H}_2\text{O}/\text{D}_2\text{O}$  9:1)  *$\alpha$* -peptide (partial assignment) (●, ■, ■):  $\delta_{\text{H}}$  4.36 (1H, dd,  $J = 9.2, 4.9$  Hz, Lys- $\alpha$ -CHCONHGlyOH), 3.93 (1H, AB,  $J = 17.3$  Hz, CHCONHLysOH), 3.91 (1H, AB,  $J = 17.3$  Hz, CHCONHLysOH), 3.71 (1H, ABX,  $J = 17.3, 4.0$  Hz, LysCHCO<sub>2</sub>H), 2.03 (3H, s, **H<sub>3</sub>C**(CO));  $\epsilon$ -amidine (partial assignment) (■, ▼):  $\delta_{\text{H}}$  4.15 (2H, s, CH<sub>2</sub>(NH)NH), 2.06 (3H, s, **H<sub>3</sub>C**(CO)); *LL*-lysylglycine, **2<sub>KG</sub>** (partial assignment) (■):  $\delta_{\text{H}}$  3.80 (1H, AB,  $J = 17.3$  Hz, LysCHCO<sub>2</sub>H); *N*-Acetyl glycine amide, **7** (x) (partial assignment):  $\delta_{\text{H}}$  3.87 (2H, s, CH<sub>2</sub>). HRMS (ESI)  $m/z$  for **5<sub>KG</sub>** [ $\text{C}_{12}\text{H}_{23}\text{N}_4\text{O}_5$ ]<sup>+</sup>: calcd 303.1663, found 303.1661.

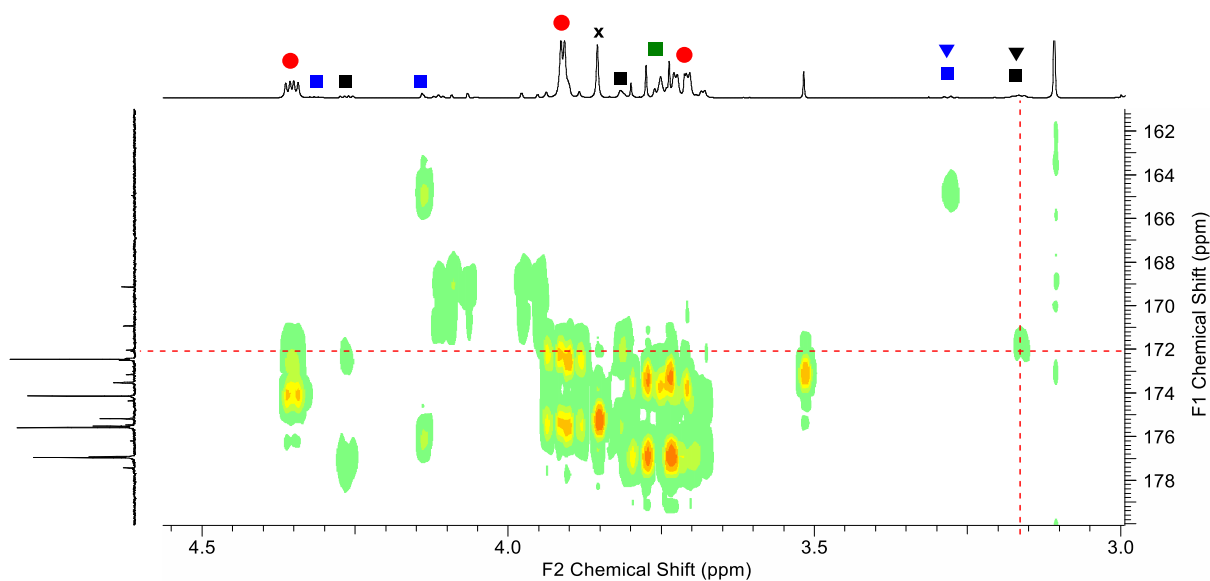

**Figure S139.**  $^1\text{H}$ - $^{13}\text{C}$  HMBC ( $^1\text{H}$ : 700 MHz [3.0-4.6 ppm],  $^{13}\text{C}$ : 176 MHz [162-180 ppm],  $\text{H}_2\text{O}/\text{D}_2\text{O}$  9:1) spectrum showing the  $^3J_{\text{CH}}$  coupling of the Lys- $\epsilon\text{H}_2$  in **11<sub>KG</sub>** and **18<sub>KG</sub>** at 3.18 ppm with a resonance at 172 ppm, characteristic of amide formation.

| Entry | time / days | $\alpha$ -amide                                                                    | $\epsilon$ -amidine                                        | $\epsilon$ -amide ( <b>11<sub>KG</sub></b> |
|-------|-------------|------------------------------------------------------------------------------------|------------------------------------------------------------|--------------------------------------------|
|       |             | ( <b>5<sub>KG</sub></b> + <b>10<sub>KG</sub></b> + <b>11<sub>KG</sub></b> )<br>/ % | ( <b>10<sub>KG</sub></b> + <b>17<sub>KG</sub></b> )<br>/ % | + <b>18<sub>KG</sub></b> ) / %             |
| 1     | 1           | 55                                                                                 | 17                                                         | 2                                          |
| 2     | 3           | 50                                                                                 | 7                                                          | 4                                          |
| 3     | 6           | 59                                                                                 | 2                                                          | 6                                          |

**Table S35.** Coupling of N-acetylglycine nitrile **1** with L-lysylglycine **2<sub>KG</sub>** at pH 7.0, 80 °C. **7** could not be accurately quantified due to overlap with glycol peaks.

Coupling of N-acetylglycine nitrile **1** with L-lysyl-L-lysine **2<sub>KK</sub>** at pH 7.0, 80 °C

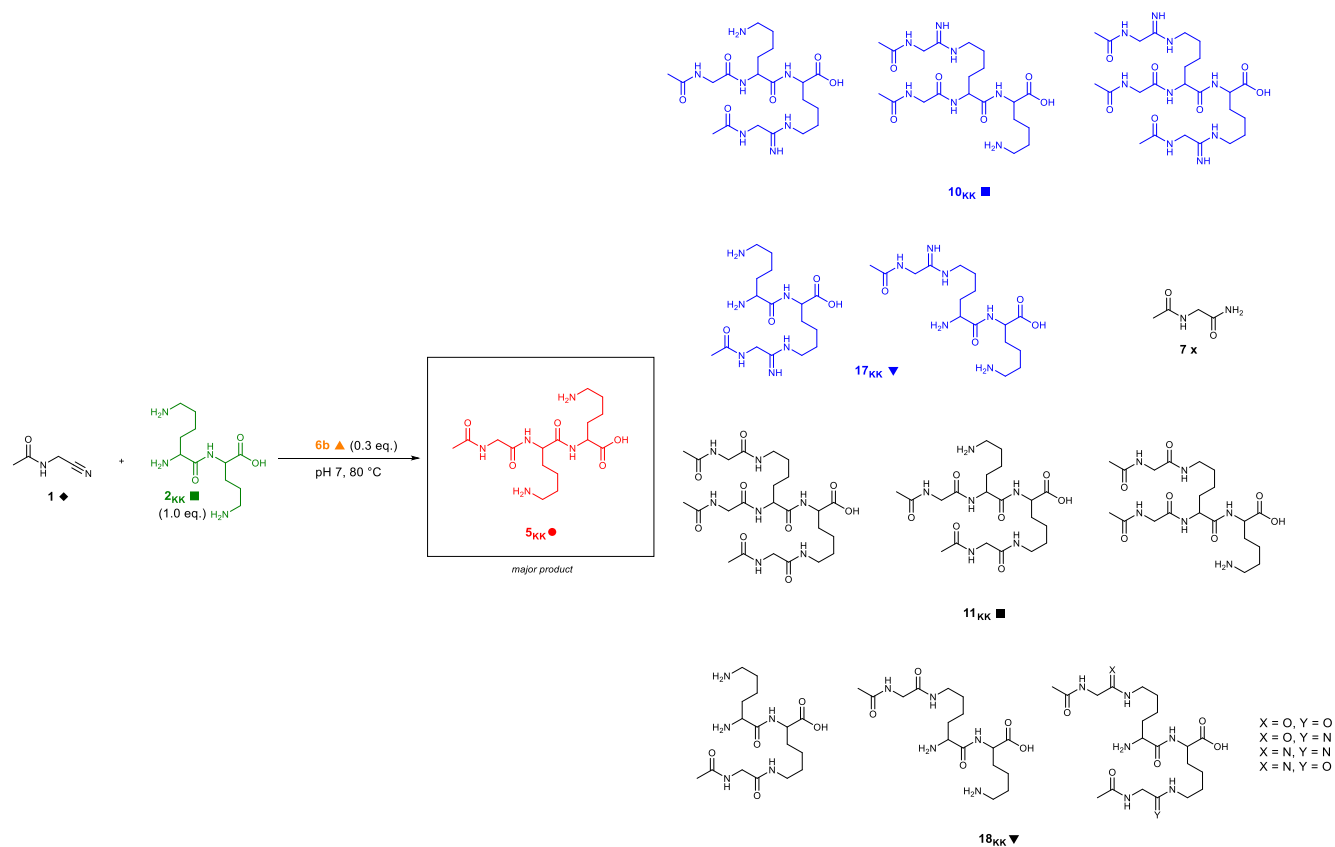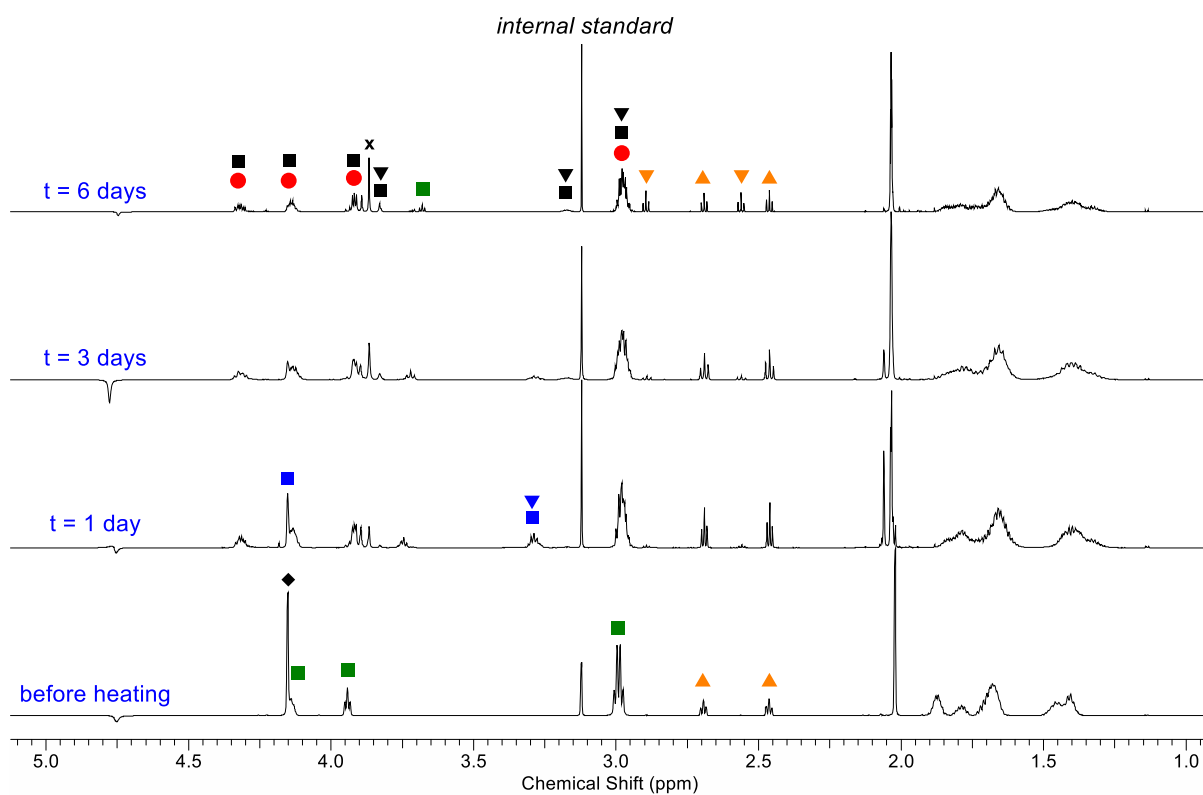

Figure S140: <sup>1</sup>H NMR (700 MHz, H<sub>2</sub>O/D<sub>2</sub>O 9:1, noesygppr1d, 1.0-5.0 ppm) spectrum to show the reaction of N-acetyl glycine nitrile (**1**, 200

mM) with LL-lysyllysine (**2<sub>KK</sub>**, 200 mM) and 3-mercaptopropanoic acid (**6b**, 60 mM, 0.3 eq.) with MSM (33 mM) as the internal standard at pH 7.0 and 80 °C. ▼ = 2-carboxyethylsulfide (formed by aerial oxidation of **6b**).

<sup>1</sup>H NMR (700 MHz, H<sub>2</sub>O/D<sub>2</sub>O 9:1) *α*-peptide (partial assignment, mixture of diastereomers) (●, ■): δ<sub>H</sub> 4.31 (1H, overlapping dd, Lys-*α*-CHCONHLysOH), 3.93 (1H, AB, *J* = 16.8 Hz, CHCONH), 3.91 (1H, AB, *J* = 16.8 Hz, CHCONH), 2.03 (3H, s, H<sub>3</sub>C(CO)); *ε*-amidine (partial assignment, mixture of diastereomers) (■, ▼): δ<sub>H</sub> 4.15 (2H, s, CH<sub>2</sub>(NH)NH), 2.06 (3H, s, H<sub>3</sub>C(CO)); LL-lysyllysine, **2<sub>KK</sub>** (partial assignment) (■): δ<sub>H</sub> 3.68 (1H, t, *J* = 6.6 Hz, CHCONH<sub>2</sub>); *N*-Acetylglycinamide, **7** (x) (partial assignment): δ<sub>H</sub> 3.87 (2H, s, CH<sub>2</sub>). HRMS (ESI) *m/z* for **5<sub>KK</sub>** [C<sub>16</sub>H<sub>32</sub>N<sub>5</sub>O<sub>5</sub>]<sup>+</sup>: calcd 374.23980, found 374.2398.

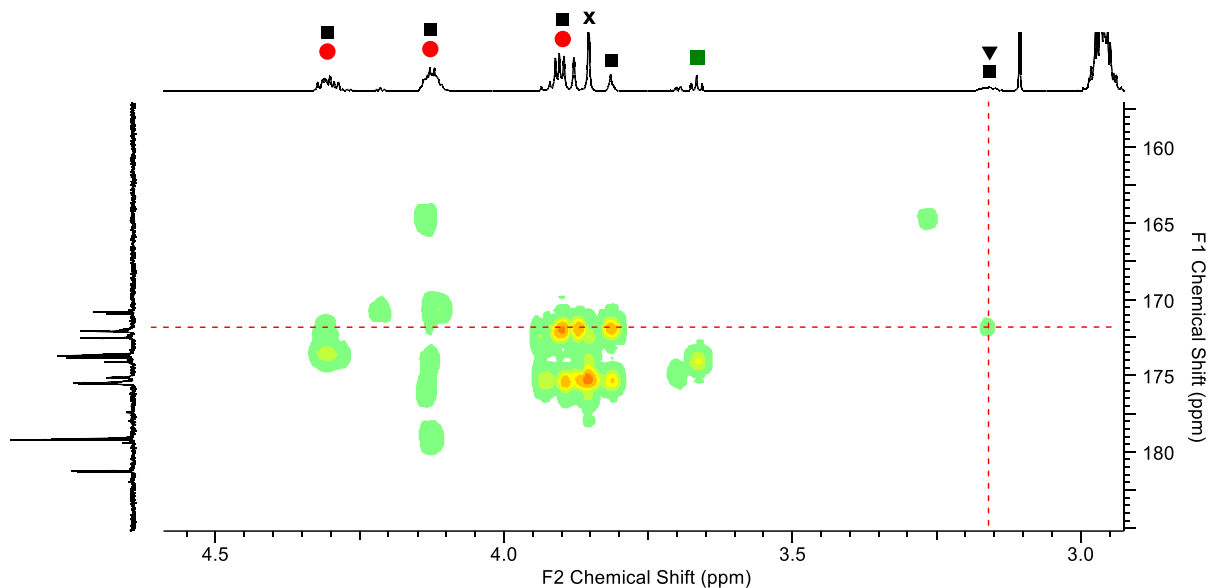

**Figure S141.** <sup>1</sup>H–<sup>13</sup>C HMBC (<sup>1</sup>H: 700 MHz [2.9–4.6 ppm], <sup>13</sup>C: 176 MHz [160–185 ppm], H<sub>2</sub>O/D<sub>2</sub>O 9:1) spectrum showing the <sup>3</sup>J<sub>CH</sub> coupling of the Lys-*ε*H<sub>2</sub> in **11<sub>KK</sub>** and **18<sub>KK</sub>** at 3.21 ppm with a resonance at 172 ppm, characteristic of amide formation.

| Entry | time / days | <i>α</i> -amide<br>( <b>5<sub>KK</sub></b> + <b>10<sub>KK</sub></b> + <b>11<sub>KK</sub></b> )<br>/ % | <i>ε</i> -amidine<br>( <b>10<sub>KK</sub></b> + <b>17<sub>KK</sub></b> )<br>/ % | <i>ε</i> -amide<br>( <b>11<sub>KK</sub></b> + <b>18<sub>KK</sub></b> ) / % |
|-------|-------------|-------------------------------------------------------------------------------------------------------|---------------------------------------------------------------------------------|----------------------------------------------------------------------------|
| 1     | 1           | 63                                                                                                    | 33                                                                              | 3                                                                          |
| 2     | 3           | 62                                                                                                    | 13                                                                              | 9                                                                          |
| 3     | 6           | 70                                                                                                    | 2                                                                               | 13                                                                         |

**Table S36.** Coupling of *N*-acetylglycine nitrile **1** with LL-lysyllysine **2<sub>KK</sub>** at pH 7.0, 80 °C. **7** could not be accurately quantified due to overlap with glycol peaks.

Coupling of N-acetylglycine nitrile **1** with O-methyl serinamide **2<sub>MeS</sub>'** catalyzed by **6b**

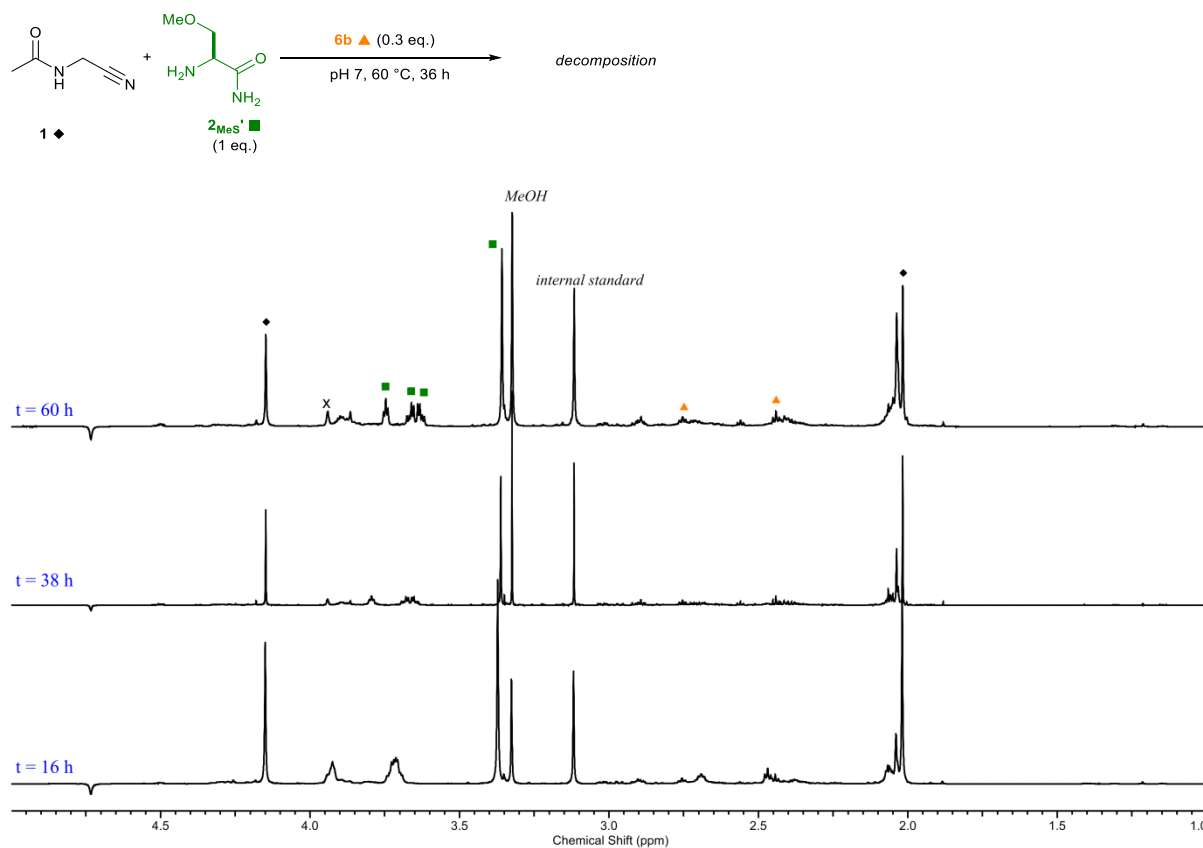

**Figure S142:** <sup>1</sup>H NMR (700 MHz, H<sub>2</sub>O/D<sub>2</sub>O 9:1, noesygppr1d, 1.0-5.0 ppm) spectrum to show the reaction of N-acetyl glycine nitrile (**1**, 200 mM) with O-methyl serinamide hydrochloride (**2<sub>MeS</sub>'**, 200 mM) and 3-mercaptopropanoic acid (**6b**, 60 mM, 0.3 eq.) with MSM (33 mM) as the internal standard at pH 7.0 and 60 °C.

Coupling between **1** and **2<sub>MeS</sub>'** at pH 7 and 60 °C shows a similar result to coupling between **1** and **2<sub>S</sub>'** at pH 8.5 (Fig. S88). The methyl group prevents oxazoline formation which enables serinamide **2<sub>S</sub>'** to form peptides in high yield at neutral pH (Fig. S89).

<sup>1</sup> Covington, A. K., Paabo, M., Robinson, R. A. & Bates, R. G. Use of the glass electrode in deuterium oxide and the relation between the standardized pD (paD) scale and the operational pH in heavy water. *Anal. Chem.* **1968**, 40, 700-706.

<sup>2</sup> Kohn, H.; Hyup Lee, S. Phosphine-Assisted Rearrangement of 4,5-Dihydroxy-1,2-Dithianes to 4-Hydroxy-3-Mercaptotetrahydrothiophenes. *Heterocycles* **2003**, 60, 47-56.

<sup>3</sup> Canavelli, P.; Islam, S.; Powner, M. W., Peptide ligation by chemoselective aminonitrile coupling in water. *Nature* **2019**, 571, 546-549.
